# Supplementary material for: Peroxiredoxin promotes longevity and H2O2-resistance in yeast through redox-modulation of protein kinase A
Source: eLife. 2020 Jul 14;9:e60346. doi: 10.7554/eLife.60346 (PMC7392609; doi:10.7554/eLife.60346)
Supplement: Supplementary file 1. [file elife-60346-supp1.xlsx]

## Sheet: Introduction
Supplementary file 1 - Mass spectrometry data (Supplemental Information to "Peroxiredoxin promotes longevity and H2O2-resistance in yeast through redox modulation of protein kinase A"). Approach: Tpk1-HBH has been tandem affinitiy purified from Yeast cells (strain: WR1832: tpk2::natMX4, tpk3::hphMX4, trp1::kanMX4, TPK1-HBH::TRP1; experimental condition: OD600=1; treated or not with 0.4mM or 0.8mM…

## Sheet: 1A.FragPipe Open Search results
FragPipe open search results, used to define variable modification for MaxQuant search
Spectrum	Peptide	Modified Peptide	Charge	Retention	Calculated M/Z	Observed M/Z	Original Delta Mass	Adjusted Delta Mass	Experimental Mass	Peptide Mass	Expectation	Hyperscore	Nextscore	PeptideProphet Probability	Intensity	Assigned Modifications	Observed Modifications	Number of Phospho Sites	Phospho Site Localization	Is Unique	Gene	Protein	Protein Description	Mapped Proteins
20180918_Lumos_RSLC6_Reiter_Ammerer_MFPL_onbead_Tpk1_1_1.03028.03028.3	SVEKEGGETQEKPK		3	619.508	515.93	516.264	1.0019	1.0039	1545.77	1544.77	1.295e-13	50.875	36.187	1	0		0.9970:Label:15N(1) (15N(1))	0		TRUE	TPK1	sp|P06244|KAPA_YEAST	cAMP-dependent protein kinase type 1
20180918_Lumos_RSLC6_Reiter_Ammerer_MFPL_onbead_Tpk1_1_1.03039.03039.2	SVEKEGGETQEKPK		2	621.169	773.391	773.391	-0.0014	0.0006	1544.77	1544.77	2.616e-15	38.744	22.052	1	0		Unknown	0		TRUE	TPK1	sp|P06244|KAPA_YEAST	cAMP-dependent protein kinase type 1
20180918_Lumos_RSLC6_Reiter_Ammerer_MFPL_onbead_Tpk1_1_1.03053.03053.4	SVEKEGGETQEKPK		4	623.393	387.199	387.199	-0.0032	-0.0012	1544.77	1544.77	2.215e-07	32.396	30.114	1	0		Unknown	0		TRUE	TPK1	sp|P06244|KAPA_YEAST	cAMP-dependent protein kinase type 1
20180918_Lumos_RSLC6_Reiter_Ammerer_MFPL_onbead_Tpk1_1_1.03068.03068.3	EGGETQEKPK		3	625.82	368.184	453.896	257.136	257.138	1358.67	1101.53	0.006134	20.979	18.872	0.977	0		Unknown	0		TRUE	TPK1	sp|P06244|KAPA_YEAST	cAMP-dependent protein kinase type 1
20180918_Lumos_RSLC6_Reiter_Ammerer_MFPL_onbead_Tpk1_1_1.03072.03072.2	EGGETQEKPK		2	626.557	551.772	680.34	257.134	257.136	1358.66	1101.53	0.01344	15.568	15.352	0.9111	0		Unknown	0		TRUE	TPK1	sp|P06244|KAPA_YEAST	cAMP-dependent protein kinase type 1
20180918_Lumos_RSLC6_Reiter_Ammerer_MFPL_onbead_Tpk1_1_1.03222.03222.3	SVEKEGGETQEKPK		3	651.395	515.93	515.929	-0.0021	-0.0001	1544.77	1544.77	6.896e-10	48.77	36.188	1	0		Unknown	0		TRUE	TPK1	sp|P06244|KAPA_YEAST	cAMP-dependent protein kinase type 1
20180918_Lumos_RSLC6_Reiter_Ammerer_MFPL_onbead_Tpk1_1_1.03233.03233.2	SVEKEGGETQEKPK		2	653.28	773.391	773.892	1.0006	1.0026	1545.77	1544.77	0.000639	16.592	16.592	0.9996	0		0.9970:Label:15N(1) (15N(1))	0		TRUE	TPK1	sp|P06244|KAPA_YEAST	cAMP-dependent protein kinase type 1
20180918_Lumos_RSLC6_Reiter_Ammerer_MFPL_onbead_Tpk1_1_1.03414.03414.3	SVEKEGGETQEKPK		3	682.609	515.93	515.929	-0.0022	-0.0002	1544.77	1544.77	7.364e-07	34.969	27.887	0.9999	0		Unknown	0		TRUE	TPK1	sp|P06244|KAPA_YEAST	cAMP-dependent protein kinase type 1
20180918_Lumos_RSLC6_Reiter_Ammerer_MFPL_onbead_Tpk1_1_1.03442.03442.3	LKQVEHTNDER		3	687.13	456.9	456.9	-0.0017	0.0003	1367.68	1367.68	1.744e-06	35.196	28.473	1	0		Unknown	0		FALSE	TPK3	sp|P05986|KAPC_YEAST	cAMP-dependent protein kinase type 3	sp|P06244|KAPA_YEAST
20180918_Lumos_RSLC6_Reiter_Ammerer_MFPL_onbead_Tpk1_1_1.03443.03443.2	LKQVEHTNDER		2	687.398	684.847	684.846	-0.0015	0.0005	1367.68	1367.68	1.386e-10	29.932	15.42	1	0		Unknown	0		FALSE	TPK3	sp|P05986|KAPC_YEAST	cAMP-dependent protein kinase type 3	sp|P06244|KAPA_YEAST
20180918_Lumos_RSLC6_Reiter_Ammerer_MFPL_onbead_Tpk1_1_1.03464.03464.2	QVEHTNDER		2	690.755	564.257	564.257	-0.0009	0.0011	1126.5	1126.5	0.0001141	23.646	15.89	1	0		Unknown	0		FALSE	TPK3	sp|P05986|KAPC_YEAST	cAMP-dependent protein kinase type 3	sp|P06244|KAPA_YEAST, sp|P06245|KAPB_YEAST
20180918_Lumos_RSLC6_Reiter_Ammerer_MFPL_onbead_Tpk1_1_1.03470.03470.3	LKQVEHTNDER		3	691.738	456.9	463.238	19.0125	19.0145	1386.69	1367.68	0.0008778	27.575	19.954	0.9885	0		19.0098:Gln->Phe (Gln->Phe substitution), 19.0137:Label:2H(3)+Oxidation (Oxidised 2H(3) labelled Methionine)	0		FALSE	TPK3	sp|P05986|KAPC_YEAST	cAMP-dependent protein kinase type 3	sp|P06244|KAPA_YEAST
20180918_Lumos_RSLC6_Reiter_Ammerer_MFPL_onbead_Tpk1_1_1.03479.03479.3	QVEHTNDER		3	693.18	376.507	419.205	128.093	128.095	1254.59	1126.5	0.0001902	26.414	23.173	0.9993	0		128.0950:Lys (Addition of lysine due to transpeptidation)	0		FALSE	TPK3	sp|P05986|KAPC_YEAST	cAMP-dependent protein kinase type 3	sp|P06244|KAPA_YEAST, sp|P06245|KAPB_YEAST
20180918_Lumos_RSLC6_Reiter_Ammerer_MFPL_onbead_Tpk1_1_1.03480.03480.2	LKQVEHTNDER		2	693.449	684.847	628.304	-113.085	-113.083	1254.59	1367.68	0.01141	15.286	14.665	0.636	0		Unknown	0		FALSE	TPK3	sp|P05986|KAPC_YEAST	cAMP-dependent protein kinase type 3	sp|P06244|KAPA_YEAST
20180918_Lumos_RSLC6_Reiter_Ammerer_MFPL_onbead_Tpk1_1_1.03484.03484.3	LKQVEHTNDER		3	694.073	456.9	462.904	18.0096	18.0116	1385.69	1367.68	1.769e-06	29.846	20.752	0.9988	0		Unknown	0		FALSE	TPK3	sp|P05986|KAPC_YEAST	cAMP-dependent protein kinase type 3	sp|P06244|KAPA_YEAST
20180918_Lumos_RSLC6_Reiter_Ammerer_MFPL_onbead_Tpk1_1_1.03485.03485.2	LKQVEHTNDER		2	694.34	684.847	706.827	43.9612	43.9632	1411.64	1367.68	0.03175	13.283	9.883	0.8584	0		Unknown	0		FALSE	TPK3	sp|P05986|KAPC_YEAST	cAMP-dependent protein kinase type 3	sp|P06244|KAPA_YEAST
20180918_Lumos_RSLC6_Reiter_Ammerer_MFPL_onbead_Tpk1_1_1.03492.03492.3	SVEKEGGETQEKPK		3	695.991	515.93	516.265	1.004	1.006	1545.77	1544.77	2.657e-07	37.651	33.352	1	0		0.9970:Label:15N(1) (15N(1))	0		TRUE	TPK1	sp|P06244|KAPA_YEAST	cAMP-dependent protein kinase type 1
20180918_Lumos_RSLC6_Reiter_Ammerer_MFPL_onbead_Tpk1_1_1.03531.03531.3	SVEKEGGETQEKPK		3	705.817	515.93	534.937	57.0205	57.0225	1601.79	1544.77	3.5e-07	28.149	14.108	0.9967	0		57.0215:Gly->Asn (Gly->Asn substitution), 57.0215:Gly (Addition of Glycine), 57.0215:Carbamidomethyl (Iodoacetamide derivative), 57.0215:Ala->Gln (Ala->Gln substitution)	0		TRUE	TPK1	sp|P06244|KAPA_YEAST	cAMP-dependent protein kinase type 1
20180918_Lumos_RSLC6_Reiter_Ammerer_MFPL_onbead_Tpk1_1_1.03596.03596.3	LKQVEHTNDER		3	717.375	456.9	456.9	-0.0016	0.0004	1367.68	1367.68	1.172e-05	28.41	24.513	1	0		Unknown	0		FALSE	TPK3	sp|P05986|KAPC_YEAST	cAMP-dependent protein kinase type 3	sp|P06244|KAPA_YEAST
20180918_Lumos_RSLC6_Reiter_Ammerer_MFPL_onbead_Tpk1_1_1.03597.03597.2	LKQVEHTNDER		2	717.643	684.847	684.846	-0.0015	0.0005	1367.68	1367.68	1.198e-11	32.178	17.629	1	0		Unknown	0		FALSE	TPK3	sp|P05986|KAPC_YEAST	cAMP-dependent protein kinase type 3	sp|P06244|KAPA_YEAST
20180918_Lumos_RSLC6_Reiter_Ammerer_MFPL_onbead_Tpk1_1_1.03754.03754.2	LKQVEHTNDER		2	747.607	684.847	684.846	-0.0019	0.0001	1367.68	1367.68	2.066e-07	28.116	15.63	1	0		Unknown	0		FALSE	TPK3	sp|P05986|KAPC_YEAST	cAMP-dependent protein kinase type 3	sp|P06244|KAPA_YEAST
20180918_Lumos_RSLC6_Reiter_Ammerer_MFPL_onbead_Tpk1_1_1.03761.03761.3	LKQVEHTNDER		3	748.999	456.9	456.9	-0.0013	0.0007	1367.68	1367.68	1.26e-06	35.204	28.474	1	0		Unknown	0		FALSE	TPK3	sp|P05986|KAPC_YEAST	cAMP-dependent protein kinase type 3	sp|P06244|KAPA_YEAST
20180918_Lumos_RSLC6_Reiter_Ammerer_MFPL_onbead_Tpk1_1_1.03914.03914.3	LKQVEHTNDER		3	776.832	456.9	457.228	0.9819	0.9839	1368.66	1367.68	1.938e-05	30.354	25.232	1	0		0.9840:Deamidated (Deamidation), 0.9840:Asn->Asp (Asn->Asp substitution), 0.9840:Gln->Glu (Gln->Glu substitution)	0		FALSE	TPK3	sp|P05986|KAPC_YEAST	cAMP-dependent protein kinase type 3	sp|P06244|KAPA_YEAST
20180918_Lumos_RSLC6_Reiter_Ammerer_MFPL_onbead_Tpk1_1_1.03921.03921.2	LKQVEHTNDER		2	777.921	684.847	685.338	0.9829	0.9849	1368.66	1367.68	3.13e-05	25.451	15.048	1	0		0.9840:Deamidated (Deamidation), 0.9840:Asn->Asp (Asn->Asp substitution), 0.9840:Gln->Glu (Gln->Glu substitution)	0		FALSE	TPK3	sp|P05986|KAPC_YEAST	cAMP-dependent protein kinase type 3	sp|P06244|KAPA_YEAST
20180918_Lumos_RSLC6_Reiter_Ammerer_MFPL_onbead_Tpk1_1_1.03994.03994.3	SVEKEGGETQEKPK	S[167]VEKEGGETQEKPK	3	789.81	542.586	542.585	-0.0024	-0.0004	1624.73	1624.73	2.803e-05	24.742	14.946	0.9999	0	1S(79.9663)	Unknown	0		TRUE	TPK1	sp|P06244|KAPA_YEAST	cAMP-dependent protein kinase type 1
20180918_Lumos_RSLC6_Reiter_Ammerer_MFPL_onbead_Tpk1_1_1.04085.04085.3	LKQVEHTNDER		3	804.494	456.9	456.9	-0.0019	0.0001	1367.68	1367.68	7.689e-05	27.9	22.794	1	0		Unknown	0		FALSE	TPK3	sp|P05986|KAPC_YEAST	cAMP-dependent protein kinase type 3	sp|P06244|KAPA_YEAST
20180918_Lumos_RSLC6_Reiter_Ammerer_MFPL_onbead_Tpk1_1_1.04088.04088.2	LKQVEHTNDER		2	805.076	684.847	685.338	0.9818	0.9838	1368.66	1367.68	1.751e-07	26.902	14.909	1	0		0.9840:Deamidated (Deamidation), 0.9840:Asn->Asp (Asn->Asp substitution), 0.9840:Gln->Glu (Gln->Glu substitution)	0		FALSE	TPK3	sp|P05986|KAPC_YEAST	cAMP-dependent protein kinase type 3	sp|P06244|KAPA_YEAST
20180918_Lumos_RSLC6_Reiter_Ammerer_MFPL_onbead_Tpk1_1_1.04232.04232.3	LKQVEHTNDER		3	828.424	456.9	457.228	0.9824	0.9844	1368.66	1367.68	3.373e-06	30.442	25.3	1	0		0.9840:Deamidated (Deamidation), 0.9840:Asn->Asp (Asn->Asp substitution), 0.9840:Gln->Glu (Gln->Glu substitution)	0		FALSE	TPK3	sp|P05986|KAPC_YEAST	cAMP-dependent protein kinase type 3	sp|P06244|KAPA_YEAST
20180918_Lumos_RSLC6_Reiter_Ammerer_MFPL_onbead_Tpk1_1_1.04266.04266.2	LKQVEHTNDER		2	833.864	684.847	685.338	0.9825	0.9845	1368.66	1367.68	2.647e-07	24.394	15.607	1	0		0.9840:Deamidated (Deamidation), 0.9840:Asn->Asp (Asn->Asp substitution), 0.9840:Gln->Glu (Gln->Glu substitution)	0		FALSE	TPK3	sp|P05986|KAPC_YEAST	cAMP-dependent protein kinase type 3	sp|P06244|KAPA_YEAST
20180918_Lumos_RSLC6_Reiter_Ammerer_MFPL_onbead_Tpk1_1_1.04277.04277.3	LKQVEHTNDER		3	835.669	456.9	456.9	-0.0017	0.0003	1367.68	1367.68	7.244e-06	31.978	26.501	1	0		Unknown	0		FALSE	TPK3	sp|P05986|KAPC_YEAST	cAMP-dependent protein kinase type 3	sp|P06244|KAPA_YEAST
20180918_Lumos_RSLC6_Reiter_Ammerer_MFPL_onbead_Tpk1_1_1.04480.04480.3	LKQVEHTNDER		3	868.497	456.9	456.9	-0.0017	0.0003	1367.68	1367.68	2.264e-05	30.876	25.728	0.9999	0		Unknown	0		FALSE	TPK3	sp|P05986|KAPC_YEAST	cAMP-dependent protein kinase type 3	sp|P06244|KAPA_YEAST
20180918_Lumos_RSLC6_Reiter_Ammerer_MFPL_onbead_Tpk1_1_1.04664.04664.3	GETSERETTATESGNESK		3	898.856	638.284	637.636	-1.9422	-1.9402	1909.89	1911.83	0.0002738	25.603	20.435	0.9946	0		-1.9429:Asp->Xle (Asp->Leu/Ile substitution)	0		TRUE	TPK1	sp|P06244|KAPA_YEAST	cAMP-dependent protein kinase type 1
20180918_Lumos_RSLC6_Reiter_Ammerer_MFPL_onbead_Tpk1_1_1.04697.04697.3	GETSERETTATESGNESK		3	904.078	638.284	638.283	-0.0035	-0.0015	1911.83	1911.83	1.984e-06	46.997	32.401	1	0		Unknown	0		TRUE	TPK1	sp|P06244|KAPA_YEAST	cAMP-dependent protein kinase type 1
20180918_Lumos_RSLC6_Reiter_Ammerer_MFPL_onbead_Tpk1_1_1.04827.04827.3	LKQVEHTNDER		3	925.063	456.9	456.899	-0.0025	-0.0005	1367.68	1367.68	6.904e-07	32.045	25.487	0.9999	0		Unknown	0		FALSE	TPK3	sp|P05986|KAPC_YEAST	cAMP-dependent protein kinase type 3	sp|P06244|KAPA_YEAST
20180918_Lumos_RSLC6_Reiter_Ammerer_MFPL_onbead_Tpk1_1_1.05411.05411.2	QGEESQKGETSER		2	1019.3	732.832	724.317	-17.0285	-17.0265	1446.62	1463.65	0.1182	12.234	10.226	0.8803	0		-17.0265:Gln->pyro-Glu (Pyro-glu from Q), -17.0265:Ammonia-loss (Loss of ammonia)	0		TRUE	TPK1	sp|P06244|KAPA_YEAST	cAMP-dependent protein kinase type 1
20180918_Lumos_RSLC6_Reiter_Ammerer_MFPL_onbead_Tpk1_1_1.06098.06098.3	QGEESQKGETSER		3	1131.74	488.89	617.942	387.156	387.158	1850.81	1463.65	0.05085	19.148	16.229	0.5213	0		Unknown	0		TRUE	TPK1	sp|P06244|KAPA_YEAST	cAMP-dependent protein kinase type 1
20180918_Lumos_RSLC6_Reiter_Ammerer_MFPL_onbead_Tpk1_1_1.06203.06203.2	ETTATESGNESK		2	1148.6	627.278	675.55	96.5436	96.5456	1349.09	1252.54	0.07456	15.269	13.308	0.4262	0		Unknown	0		TRUE	TPK1	sp|P06244|KAPA_YEAST	cAMP-dependent protein kinase type 1
20180918_Lumos_RSLC6_Reiter_Ammerer_MFPL_onbead_Tpk1_1_1.06394.06394.3	SVEKEGGETQEKPK		3	1180.48	515.93	530.265	43.0041	43.0061	1587.77	1544.77	7.02e-05	24.169	17.131	0.9984	0		43.0058:Carbamyl (Carbamylation), 43.0058:Ala->Asn (Ala->Asn substitution)	0		TRUE	TPK1	sp|P06244|KAPA_YEAST	cAMP-dependent protein kinase type 1
20180918_Lumos_RSLC6_Reiter_Ammerer_MFPL_onbead_Tpk1_1_1.06527.06527.3	LKQVEHTNDER		3	1202.05	456.9	456.9	-0.002	0	1367.68	1367.68	0.007727	17.449	16.623	0.999	0		Unknown	0		FALSE	TPK3	sp|P05986|KAPC_YEAST	cAMP-dependent protein kinase type 3	sp|P06244|KAPA_YEAST
20180918_Lumos_RSLC6_Reiter_Ammerer_MFPL_onbead_Tpk1_1_1.06633.06633.3	SVEKEGGETQEKPK		3	1219.29	515.93	576.941	183.033	183.035	1727.8	1544.77	1.081e-05	28.787	24.703	0.9969	0		183.0354:AEBS (Aminoethylbenzenesulfonylation)	0		TRUE	TPK1	sp|P06244|KAPA_YEAST	cAMP-dependent protein kinase type 1
20180918_Lumos_RSLC6_Reiter_Ammerer_MFPL_onbead_Tpk1_1_1.06672.06672.3	LKQVEHTNDER		3	1225.68	456.9	471.235	43.0044	43.0064	1410.68	1367.68	0.002464	27.652	27.147	0.9822	0		43.0058:Carbamyl (Carbamylation), 43.0058:Ala->Asn (Ala->Asn substitution)	0		FALSE	TPK3	sp|P05986|KAPC_YEAST	cAMP-dependent protein kinase type 3	sp|P06244|KAPA_YEAST
20180918_Lumos_RSLC6_Reiter_Ammerer_MFPL_onbead_Tpk1_1_1.06679.06679.2	LKQVEHTNDER		2	1226.83	684.847	706.349	43.005	43.007	1410.68	1367.68	2.134e-08	28.81	18.443	1	0		43.0058:Carbamyl (Carbamylation), 43.0058:Ala->Asn (Ala->Asn substitution)	0		FALSE	TPK3	sp|P05986|KAPC_YEAST	cAMP-dependent protein kinase type 3	sp|P06244|KAPA_YEAST
20180918_Lumos_RSLC6_Reiter_Ammerer_MFPL_onbead_Tpk1_1_1.08122.08122.3	SQRFPNPVAK		3	1475.14	381.88	424.578	128.093	128.095	1270.71	1142.62	0.02381	20.808	16.733	0.8354	0		128.0950:Lys (Addition of lysine due to transpeptidation)	0		FALSE	TPK3	sp|P05986|KAPC_YEAST	cAMP-dependent protein kinase type 3	sp|P06244|KAPA_YEAST, sp|P06245|KAPB_YEAST
20180918_Lumos_RSLC6_Reiter_Ammerer_MFPL_onbead_Tpk1_1_1.08195.08195.3	SQRFPNPVAK		3	1486.65	381.88	424.884	129.012	129.014	1271.63	1142.62	0.01298	22.821	20.629	0.9907	0		Unknown	0		FALSE	TPK3	sp|P05986|KAPC_YEAST	cAMP-dependent protein kinase type 3	sp|P06244|KAPA_YEAST, sp|P06245|KAPB_YEAST
20180918_Lumos_RSLC6_Reiter_Ammerer_MFPL_onbead_Tpk1_1_1.08476.08476.2	GETSERETTATESGNESK		2	1532.32	956.922	822.37	-269.105	-269.103	1642.72	1911.83	0.0006872	24.859	17.971	0.9336	0		Unknown	0		TRUE	TPK1	sp|P06244|KAPA_YEAST	cAMP-dependent protein kinase type 1
20180918_Lumos_RSLC6_Reiter_Ammerer_MFPL_onbead_Tpk1_1_1.08492.08492.2	EGGETQEKPK		2	1535.12	551.772	718.825	334.104	334.106	1435.63	1101.53	0.07449	17.398	15.865	0.9134	0		Unknown	0		TRUE	TPK1	sp|P06244|KAPA_YEAST	cAMP-dependent protein kinase type 1
20180918_Lumos_RSLC6_Reiter_Ammerer_MFPL_onbead_Tpk1_1_1.09179.09179.2	ETTATESGNESKSVEK		2	1649	848.897	797.362	-103.07	-103.068	1592.71	1695.78	7.255e-05	19.445	19.445	1	0		Unknown	0		FALSE	TPK1	sp|P06244|KAPA_YEAST	cAMP-dependent protein kinase type 1
20180918_Lumos_RSLC6_Reiter_Ammerer_MFPL_onbead_Tpk1_1_1.10992.10992.2	QFIAQAR		2	1944.37	417.235	417.234	-0.0014	0.0006	832.454	832.456	0.8808	14.607	12.463	0.9797	0		Unknown	0		TRUE	TPK1	sp|P06244|KAPA_YEAST	cAMP-dependent protein kinase type 1
20180918_Lumos_RSLC6_Reiter_Ammerer_MFPL_onbead_Tpk1_1_1.11165.11165.2	QFIAQAR		2	1974.98	417.235	417.234	-0.0014	0.0006	832.454	832.456	0.9236	14.567	12.409	0.9787	0		Unknown	0		TRUE	TPK1	sp|P06244|KAPA_YEAST	cAMP-dependent protein kinase type 1
20180918_Lumos_RSLC6_Reiter_Ammerer_MFPL_onbead_Tpk1_1_1.11347.11347.3	SQRFPNPVAK		3	2004.3	381.88	381.88	-0.002	0	1142.62	1142.62	0.0002066	26.109	17.785	1	0		Unknown	0		FALSE	TPK3	sp|P05986|KAPC_YEAST	cAMP-dependent protein kinase type 3	sp|P06244|KAPA_YEAST, sp|P06245|KAPB_YEAST
20180918_Lumos_RSLC6_Reiter_Ammerer_MFPL_onbead_Tpk1_1_1.11360.11360.2	QFIAQAR		2	2006.24	417.235	417.234	-0.0013	0.0007	832.454	832.456	0.1142	14.591	14.094	0.9983	0		Unknown	0		TRUE	TPK1	sp|P06244|KAPA_YEAST	cAMP-dependent protein kinase type 1
20180918_Lumos_RSLC6_Reiter_Ammerer_MFPL_onbead_Tpk1_1_1.11432.11432.2	SQRFPNPVAK		2	2017.82	572.317	572.317	-0.0009	0.0011	1142.62	1142.62	7.726e-05	18.304	8.517	1	0		Unknown	0		FALSE	TPK3	sp|P05986|KAPC_YEAST	cAMP-dependent protein kinase type 3	sp|P06244|KAPA_YEAST, sp|P06245|KAPB_YEAST
20180918_Lumos_RSLC6_Reiter_Ammerer_MFPL_onbead_Tpk1_1_1.11444.11444.2	SQRFPNPVAK		2	2019.69	572.317	572.317	-0.0012	0.0008	1142.62	1142.62	5.956e-05	18.471	8.43	1	0		Unknown	0		FALSE	TPK3	sp|P05986|KAPC_YEAST	cAMP-dependent protein kinase type 3	sp|P06244|KAPA_YEAST, sp|P06245|KAPB_YEAST
20180918_Lumos_RSLC6_Reiter_Ammerer_MFPL_onbead_Tpk1_1_1.11538.11538.3	SQRFPNPVAK		3	2034.6	381.88	381.88	-0.0021	-0.0001	1142.62	1142.62	2.474e-08	36.853	18.594	1	0		Unknown	0		FALSE	TPK3	sp|P05986|KAPC_YEAST	cAMP-dependent protein kinase type 3	sp|P06244|KAPA_YEAST, sp|P06245|KAPB_YEAST
20180918_Lumos_RSLC6_Reiter_Ammerer_MFPL_onbead_Tpk1_1_1.11553.11553.2	QFIAQAR		2	2037.02	417.235	417.235	-0.0012	0.0008	832.454	832.456	0.933	14.557	14.042	0.9785	0		Unknown	0		TRUE	TPK1	sp|P06244|KAPA_YEAST	cAMP-dependent protein kinase type 1
20180918_Lumos_RSLC6_Reiter_Ammerer_MFPL_onbead_Tpk1_1_1.11635.11635.2	SQRFPNPVAK		2	2050.49	572.317	572.316	-0.0014	0.0006	1142.62	1142.62	0.000132	19.203	19.203	1	0		Unknown	0		FALSE	TPK3	sp|P05986|KAPC_YEAST	cAMP-dependent protein kinase type 3	sp|P06244|KAPA_YEAST, sp|P06245|KAPB_YEAST
20180918_Lumos_RSLC6_Reiter_Ammerer_MFPL_onbead_Tpk1_1_1.11670.11670.4	EGGETQEKPKQPHVTYYNEEQYK	EGGET[181]QEKPKQPHVTYYNEEQYK	4	2056.27	716.321	807.388	364.27	364.272	3225.52	2861.25	5.319e-06	27.74	26.718	1	0	5T(79.9663)	Unknown	0		FALSE	TPK1	sp|P06244|KAPA_YEAST	cAMP-dependent protein kinase type 1
20180918_Lumos_RSLC6_Reiter_Ammerer_MFPL_onbead_Tpk1_1_1.11706.11706.3	EGGETQEKPKQPHVTYYNEEQYK		3	2062.07	928.103	1076.18	444.238	444.24	3225.53	2781.29	7.128e-11	47.186	33.522	1	0		Unknown	0		TRUE	TPK1	sp|P06244|KAPA_YEAST	cAMP-dependent protein kinase type 1
20180918_Lumos_RSLC6_Reiter_Ammerer_MFPL_onbead_Tpk1_1_1.11723.11723.3	SQRFPNPVAK		3	2064.7	381.88	381.88	-0.0014	0.0006	1142.62	1142.62	7.699e-07	32.344	17.025	0.9999	0		Unknown	0		FALSE	TPK3	sp|P05986|KAPC_YEAST	cAMP-dependent protein kinase type 3	sp|P06244|KAPA_YEAST, sp|P06245|KAPB_YEAST
20180918_Lumos_RSLC6_Reiter_Ammerer_MFPL_onbead_Tpk1_1_1.11751.11751.3	EGGETQEKPKQPHVTYYNEEQYK		3	2069.35	928.103	1076.18	444.238	444.24	3225.53	2781.29	9.261e-10	44.198	33.422	1	0		Unknown	0		TRUE	TPK1	sp|P06244|KAPA_YEAST	cAMP-dependent protein kinase type 1
20180918_Lumos_RSLC6_Reiter_Ammerer_MFPL_onbead_Tpk1_1_1.11764.11764.2	QPHVTYYNEEQYK		2	2071.49	849.891	737.334	-225.114	-225.112	1472.65	1697.77	0.0002574	20.439	15.099	0.9998	0		Unknown	0		TRUE	TPK1	sp|P06244|KAPA_YEAST	cAMP-dependent protein kinase type 1
20180918_Lumos_RSLC6_Reiter_Ammerer_MFPL_onbead_Tpk1_1_1.11870.11870.4	EGGETQEKPKQPHVTYYNEEQYK	EGGET[181]QEKPKQPHVTYYNEEQYK	4	2089.71	716.321	807.389	364.273	364.275	3225.53	2861.25	5.638e-08	29.964	28.424	1	0	5T(79.9663)	Unknown	0		FALSE	TPK1	sp|P06244|KAPA_YEAST	cAMP-dependent protein kinase type 1
20180918_Lumos_RSLC6_Reiter_Ammerer_MFPL_onbead_Tpk1_1_1.11933.11933.4	EGGETQEKPKQPHVTYYNEEQYK	EGGET[181]QEKPKQPHVTYYNEEQYK	4	2099.72	716.321	807.389	364.272	364.274	3225.53	2861.25	3.144e-08	26.931	24.332	1	0	5T(79.9663)	Unknown	0		FALSE	TPK1	sp|P06244|KAPA_YEAST	cAMP-dependent protein kinase type 1
20180918_Lumos_RSLC6_Reiter_Ammerer_MFPL_onbead_Tpk1_1_1.11947.11947.3	QPHVTYYNEEQYK		3	2102.02	566.93	641.98	225.148	225.15	1922.92	1697.77	2.705e-05	28.748	20.453	0.999	0		225.1558:TMT2plex (Duplex Tandem Mass TagÂ®)	0		TRUE	TPK1	sp|P06244|KAPA_YEAST	cAMP-dependent protein kinase type 1
20180918_Lumos_RSLC6_Reiter_Ammerer_MFPL_onbead_Tpk1_1_1.11970.11970.2	QPHVTYYNEEQYK		2	2105.68	849.891	737.836	-224.111	-224.109	1473.66	1697.77	0.01059	20.269	15.065	0.9597	0		Unknown	0		TRUE	TPK1	sp|P06244|KAPA_YEAST	cAMP-dependent protein kinase type 1
20180918_Lumos_RSLC6_Reiter_Ammerer_MFPL_onbead_Tpk1_1_1.11985.11985.2	SVEKEGGETQEKPK		2	2108.15	773.391	1022.78	498.772	498.774	2043.54	1544.77	0.09675	16.079	14.666	0.4355	0		Unknown	0		TRUE	TPK1	sp|P06244|KAPA_YEAST	cAMP-dependent protein kinase type 1
20180918_Lumos_RSLC6_Reiter_Ammerer_MFPL_onbead_Tpk1_1_1.12047.12047.2	GETSERETTATESGNESK		2	2117.86	956.922	1132.23	350.617	350.619	2262.45	1911.83	0.04168	18.835	15.97	0.9863	0		Unknown	0		TRUE	TPK1	sp|P06244|KAPA_YEAST	cAMP-dependent protein kinase type 1
20180918_Lumos_RSLC6_Reiter_Ammerer_MFPL_onbead_Tpk1_1_1.12269.12269.4	EGGETQEKPKQPHVTYYNEEQYK		4	2155.2	696.329	696.829	2.0007	2.0027	2783.29	2781.29	0.002875	22.667	16.051	0.9999	0		1.9979:Glu->Met (Glu->Met substitution), 2.0042:Label:18O(1) (O18 Labeling), 1.9941:Label:15N(2) (15N(2))	0		TRUE	TPK1	sp|P06244|KAPA_YEAST	cAMP-dependent protein kinase type 1
20180918_Lumos_RSLC6_Reiter_Ammerer_MFPL_onbead_Tpk1_1_1.12295.12295.3	EGGETQEKPKQPHVTYYNEEQYK		3	2159.61	928.103	928.77	2.0014	2.0034	2783.29	2781.29	6.506e-11	34.583	33.512	1	0		2.0042:Label:18O(1) (O18 Labeling), 1.9941:Label:15N(2) (15N(2)), 1.9979:Glu->Met (Glu->Met substitution)	0		TRUE	TPK1	sp|P06244|KAPA_YEAST	cAMP-dependent protein kinase type 1
20180918_Lumos_RSLC6_Reiter_Ammerer_MFPL_onbead_Tpk1_1_1.12351.12351.2	EGGETQEKPKQPHVTYYNEEQYK		2	2169.31	1391.65	1392.15	1.0024	1.0044	2782.29	2781.29	1.016e-11	32.157	22.553	1	0		0.9970:Label:15N(1) (15N(1))	0		TRUE	TPK1	sp|P06244|KAPA_YEAST	cAMP-dependent protein kinase type 1
20180918_Lumos_RSLC6_Reiter_Ammerer_MFPL_onbead_Tpk1_1_1.12356.12356.2	EGGETQEKPKQPHVTYYNEEQYK		2	2170.28	1391.65	1391.65	0.0027	0.0047	2781.29	2781.29	3.627e-15	41.34	25.077	1	0		Unknown	0		TRUE	TPK1	sp|P06244|KAPA_YEAST	cAMP-dependent protein kinase type 1
20180918_Lumos_RSLC6_Reiter_Ammerer_MFPL_onbead_Tpk1_1_1.12358.12358.5	EGGETQEKPKQPHVTYYNEEQYK		5	2170.53	557.265	557.465	1.0012	1.0032	2782.29	2781.29	0.0921	17.243	15.682	0.9981	0		0.9970:Label:15N(1) (15N(1))	0		TRUE	TPK1	sp|P06244|KAPA_YEAST	cAMP-dependent protein kinase type 1
20180918_Lumos_RSLC6_Reiter_Ammerer_MFPL_onbead_Tpk1_1_1.12372.12372.4	EGGETQEKPKQPHVTYYNEEQYK		4	2172.85	696.329	710.835	58.0217	58.0237	2839.31	2781.29	3.775e-05	20.37	15.858	1	0		58.0293:Carbofuran (2,3-dihydro-2,2-dimethyl-7-benzofuranol N-methyl carbamate), 58.0207:Gln->Trp (Gln->Trp substitution)	0		TRUE	TPK1	sp|P06244|KAPA_YEAST	cAMP-dependent protein kinase type 1
20180918_Lumos_RSLC6_Reiter_Ammerer_MFPL_onbead_Tpk1_1_1.12393.12393.4	EGGETQEKPKQPHVTYYNEEQYK		4	2176.28	696.329	701.082	19.0109	19.0129	2800.3	2781.29	8.934e-08	30.765	25.298	1	0		19.0098:Gln->Phe (Gln->Phe substitution), 19.0137:Label:2H(3)+Oxidation (Oxidised 2H(3) labelled Methionine)	0		TRUE	TPK1	sp|P06244|KAPA_YEAST	cAMP-dependent protein kinase type 1
20180918_Lumos_RSLC6_Reiter_Ammerer_MFPL_onbead_Tpk1_1_1.12449.12449.4	EGGETQEKPKQPHVTYYNEEQYK		4	2185.18	696.329	696.579	0.9985	1.0005	2782.29	2781.29	4.161e-07	32.7	22.985	1	0		0.9970:Label:15N(1) (15N(1))	0		TRUE	TPK1	sp|P06244|KAPA_YEAST	cAMP-dependent protein kinase type 1
20180918_Lumos_RSLC6_Reiter_Ammerer_MFPL_onbead_Tpk1_1_1.12478.12478.3	EGGETQEKPKQPHVTYYNEEQYK		3	2189.92	928.103	928.435	0.9953	0.9973	2782.28	2781.29	1e-15	72.471	49.589	1	0		0.9970:Label:15N(1) (15N(1))	0		TRUE	TPK1	sp|P06244|KAPA_YEAST	cAMP-dependent protein kinase type 1
20180918_Lumos_RSLC6_Reiter_Ammerer_MFPL_onbead_Tpk1_1_1.12495.12495.3	EGGETQEKPKQPHVTYYNEEQYK		3	2192.44	928.103	928.102	-0.0044	-0.0024	2781.28	2781.29	1e-15	67.243	46.678	1	0		Unknown	0		TRUE	TPK1	sp|P06244|KAPA_YEAST	cAMP-dependent protein kinase type 1
20180918_Lumos_RSLC6_Reiter_Ammerer_MFPL_onbead_Tpk1_1_1.12536.12536.2	QPHVTYYNEEQYK		2	2199.67	849.891	696.579	-306.625	-306.623	1391.14	1697.77	0.00035	21.543	16.831	0.9983	0		Unknown	0		TRUE	TPK1	sp|P06244|KAPA_YEAST	cAMP-dependent protein kinase type 1
20180918_Lumos_RSLC6_Reiter_Ammerer_MFPL_onbead_Tpk1_1_1.12632.12632.4	EGGETQEKPKQPHVTYYNEEQYK		4	2217.64	696.329	696.328	-0.0042	-0.0022	2781.28	2781.29	0.0001431	22.842	15.926	1	0		Unknown	0		TRUE	TPK1	sp|P06244|KAPA_YEAST	cAMP-dependent protein kinase type 1
20180918_Lumos_RSLC6_Reiter_Ammerer_MFPL_onbead_Tpk1_1_1.12683.12683.2	STEEQNGGGQKSLDDR	n[43]STEEQNGGGQKS[167]LDDR	2	2225.42	921.879	922.379	1.0001	1.0021	1842.74	1841.74	5.105e-06	26.247	18.554	1	0	n(42.0106), 12S(79.9663)	0.9970:Label:15N(1) (15N(1))	0		TRUE	TPK1	sp|P06244|KAPA_YEAST	cAMP-dependent protein kinase type 1
20180918_Lumos_RSLC6_Reiter_Ammerer_MFPL_onbead_Tpk1_1_1.12722.12722.2	LGNLQNGTEDVK		2	2231.66	644.331	643.839	-0.9842	-0.9822	1285.66	1286.65	1.157	13.384	11.566	0.5054	0		-0.9790:Glu->pyro-Glu+Methyl:2H(2)13C(1) (Pyro-Glu from E + Methylation Medium), -0.9840:Amidated (Amidation), -0.9840:Asp->Asn (Asp->Asn substitution), -0.9840:Glu->Gln (Glu->Gln substitution)	0		TRUE	TPK1	sp|P06244|KAPA_YEAST	cAMP-dependent protein kinase type 1
20180918_Lumos_RSLC6_Reiter_Ammerer_MFPL_onbead_Tpk1_1_1.12824.12824.4	EGGETQEKPKQPHVTYYNEEQYK		4	2248.07	696.329	696.578	0.9968	0.9988	2782.28	2781.29	0.07155	20.912	17.512	0.9969	0		0.9970:Label:15N(1) (15N(1))	0		TRUE	TPK1	sp|P06244|KAPA_YEAST	cAMP-dependent protein kinase type 1
20180918_Lumos_RSLC6_Reiter_Ammerer_MFPL_onbead_Tpk1_1_1.12838.12838.4	EGGETQEKPKQPHVTYYNEEQYK		4	2250.34	696.329	696.83	2.0012	2.0032	2783.29	2781.29	0.05364	21.063	17.525	0.9963	0		2.0042:Label:18O(1) (O18 Labeling), 1.9941:Label:15N(2) (15N(2)), 1.9979:Glu->Met (Glu->Met substitution)	0		TRUE	TPK1	sp|P06244|KAPA_YEAST	cAMP-dependent protein kinase type 1
20180918_Lumos_RSLC6_Reiter_Ammerer_MFPL_onbead_Tpk1_1_1.13069.13069.4	EGGETQEKPKQPHVTYYNEEQYK		4	2289.92	696.329	696.579	1.0002	1.0022	2782.29	2781.29	0.1536	20.127	17.843	0.995	0		0.9970:Label:15N(1) (15N(1))	0		TRUE	TPK1	sp|P06244|KAPA_YEAST	cAMP-dependent protein kinase type 1
20180918_Lumos_RSLC6_Reiter_Ammerer_MFPL_onbead_Tpk1_1_1.13212.13212.4	EGGETQEKPKQPHVTYYNEEQYK	EGGET[181]QEKPKQPHVTYYNEEQYK	4	2312.19	716.321	827.631	445.242	445.244	3306.5	2861.25	3.817e-08	30.216	15.335	1	0	5T(79.9663)	Unknown	0		FALSE	TPK1	sp|P06244|KAPA_YEAST	cAMP-dependent protein kinase type 1
20180918_Lumos_RSLC6_Reiter_Ammerer_MFPL_onbead_Tpk1_1_1.13234.13234.4	EGGETQEKPKQPHVTYYNEEQYK		4	2315.59	696.329	697.077	2.9921	2.9941	2784.28	2781.29	0.04456	20.788	18.584	0.9619	0		2.9883:Deamidated:18O(1) (Deamidation in presence of O18), 2.9911:Label:15N(3) (15N(3)), 2.9883:Delta:H(1)N(-1)18O(1) (glycosylated asparagine 18O labeling)	0		TRUE	TPK1	sp|P06244|KAPA_YEAST	cAMP-dependent protein kinase type 1
20180918_Lumos_RSLC6_Reiter_Ammerer_MFPL_onbead_Tpk1_1_1.13253.13253.2	LGNLQNGTEDVK		2	2318.36	644.331	644.33	-0.001	0.001	1286.65	1286.65	6.286e-09	33	15.635	1	0		Unknown	0		TRUE	TPK1	sp|P06244|KAPA_YEAST	cAMP-dependent protein kinase type 1
20180918_Lumos_RSLC6_Reiter_Ammerer_MFPL_onbead_Tpk1_1_1.13254.13254.4	EGGETQEKPKQPHVTYYNEEQYK		4	2318.52	696.329	696.827	1.9895	1.9915	2783.28	2781.29	0.07591	20.519	18.309	0.9955	0		1.9941:Label:15N(2) (15N(2)), 1.9979:Glu->Met (Glu->Met substitution)	0		TRUE	TPK1	sp|P06244|KAPA_YEAST	cAMP-dependent protein kinase type 1
20180918_Lumos_RSLC6_Reiter_Ammerer_MFPL_onbead_Tpk1_1_1.13262.13262.2	QFIAQAR		2	2319.8	417.235	417.234	-0.0013	0.0007	832.454	832.456	6.288	15.071	14.058	0.9388	0		Unknown	0		TRUE	TPK1	sp|P06244|KAPA_YEAST	cAMP-dependent protein kinase type 1
20180918_Lumos_RSLC6_Reiter_Ammerer_MFPL_onbead_Tpk1_1_1.13346.13346.2	QPHVTYYNEEQYK		2	2332.97	849.891	785.861	-128.06	-128.058	1569.71	1697.77	1.782e-06	24.395	14.877	1	0		Unknown	0		TRUE	TPK1	sp|P06244|KAPA_YEAST	cAMP-dependent protein kinase type 1
20180918_Lumos_RSLC6_Reiter_Ammerer_MFPL_onbead_Tpk1_1_1.13491.13491.3	EGGETQEKPKQPHVTYYNEEQYK	EGGET[181]QEKPKQPHVTYYNEEQYK	3	2355.28	954.759	867.558	-261.601	-261.599	2599.65	2861.25	3.041e-11	39.41	36.622	1	0	5T(79.9663)	Unknown	0		FALSE	TPK1	sp|P06244|KAPA_YEAST	cAMP-dependent protein kinase type 1
20180918_Lumos_RSLC6_Reiter_Ammerer_MFPL_onbead_Tpk1_1_1.13511.13511.3	EGGETQEKPKQPHVTYYNEEQYK		3	2358.56	928.103	1012.45	253.032	253.034	3034.32	2781.29	0.01064	19.331	14.458	0.5145	0		Unknown	0		TRUE	TPK1	sp|P06244|KAPA_YEAST	cAMP-dependent protein kinase type 1
20180918_Lumos_RSLC6_Reiter_Ammerer_MFPL_onbead_Tpk1_1_1.13706.13706.2	LGNLQNGTEDVK		2	2389.45	644.331	644.33	-0.001	0.001	1286.65	1286.65	6.378e-09	33.238	15.73	1	0		Unknown	0		TRUE	TPK1	sp|P06244|KAPA_YEAST	cAMP-dependent protein kinase type 1
20180918_Lumos_RSLC6_Reiter_Ammerer_MFPL_onbead_Tpk1_1_1.13724.13724.2	FPNPVAK		2	2392.27	386.721	386.721	-0.0008	0.0012	771.427	771.428	4.037	15.498	14.228	0.9459	0		Unknown	0		FALSE	TPK3	sp|P05986|KAPC_YEAST	cAMP-dependent protein kinase type 3	sp|P06244|KAPA_YEAST, sp|P06245|KAPB_YEAST
20180918_Lumos_RSLC6_Reiter_Ammerer_MFPL_onbead_Tpk1_1_1.13902.13902.2	LGNLQNGTEDVK		2	2420.44	644.331	644.33	-0.0015	0.0005	1286.65	1286.65	3.053e-10	37.008	17.386	1	0		Unknown	0		TRUE	TPK1	sp|P06244|KAPA_YEAST	cAMP-dependent protein kinase type 1
20180918_Lumos_RSLC6_Reiter_Ammerer_MFPL_onbead_Tpk1_1_1.13923.13923.2	FPNPVAK		2	2423.85	386.721	386.721	-0.0011	0.0009	771.427	771.428	0.006466	18.302	14.224	0.9998	0		Unknown	0		FALSE	TPK3	sp|P05986|KAPC_YEAST	cAMP-dependent protein kinase type 3	sp|P06244|KAPA_YEAST, sp|P06245|KAPB_YEAST
20180918_Lumos_RSLC6_Reiter_Ammerer_MFPL_onbead_Tpk1_1_1.13966.13966.2	STEEQNGGGQKSLDDR	n[43]STEEQNGGGQKS[167]LDDR	2	2430.36	921.879	922.371	0.9842	0.9862	1842.73	1841.74	5.378	13.157	12.324	0.6257	0	n(42.0106), 12S(79.9663)	0.9840:Deamidated (Deamidation), 0.9840:Asn->Asp (Asn->Asp substitution), 0.9840:Gln->Glu (Gln->Glu substitution)	0		TRUE	TPK1	sp|P06244|KAPA_YEAST	cAMP-dependent protein kinase type 1
20180918_Lumos_RSLC6_Reiter_Ammerer_MFPL_onbead_Tpk1_1_1.14108.14108.2	LGNLQNGTEDVK		2	2452.17	644.331	644.33	-0.0016	0.0004	1286.64	1286.65	9.39e-11	37.034	17.403	1	0		Unknown	0		TRUE	TPK1	sp|P06244|KAPA_YEAST	cAMP-dependent protein kinase type 1
20180918_Lumos_RSLC6_Reiter_Ammerer_MFPL_onbead_Tpk1_1_1.14129.14129.2	FPNPVAK		2	2455.39	386.721	386.721	-0.0012	0.0008	771.427	771.428	0.007798	18.281	14.284	0.9997	0		Unknown	0		FALSE	TPK3	sp|P05986|KAPC_YEAST	cAMP-dependent protein kinase type 3	sp|P06244|KAPA_YEAST, sp|P06245|KAPB_YEAST
20180918_Lumos_RSLC6_Reiter_Ammerer_MFPL_onbead_Tpk1_1_1.14133.14133.3	QPHVTYYNEEQYK		3	2456.05	566.93	586.272	58.0257	58.0277	1755.79	1697.77	0.1067	19.534	19.395	0.9179	0		58.0207:Gln->Trp (Gln->Trp substitution), 58.0293:Carbofuran (2,3-dihydro-2,2-dimethyl-7-benzofuranol N-methyl carbamate)	0		TRUE	TPK1	sp|P06244|KAPA_YEAST	cAMP-dependent protein kinase type 1
20180918_Lumos_RSLC6_Reiter_Ammerer_MFPL_onbead_Tpk1_1_1.14168.14168.2	QPHVTYYNEEQYK		2	2461.57	849.891	850.391	0.9989	1.0009	1698.77	1697.77	1.625e-07	26.579	17.782	1	0		0.9970:Label:15N(1) (15N(1))	0		TRUE	TPK1	sp|P06244|KAPA_YEAST	cAMP-dependent protein kinase type 1
20180918_Lumos_RSLC6_Reiter_Ammerer_MFPL_onbead_Tpk1_1_1.14171.14171.3	QPHVTYYNEEQYK		3	2461.96	566.93	567.264	1.0008	1.0028	1698.77	1697.77	5.374e-05	29.333	19.397	1	0		0.9970:Label:15N(1) (15N(1))	0		TRUE	TPK1	sp|P06244|KAPA_YEAST	cAMP-dependent protein kinase type 1
20180918_Lumos_RSLC6_Reiter_Ammerer_MFPL_onbead_Tpk1_1_1.14209.14209.3	QPHVTYYNEEQYK		3	2467.76	566.93	561.254	-17.0275	-17.0255	1680.74	1697.77	0.0531	21.487	17.236	0.9038	0		-17.0265:Ammonia-loss (Loss of ammonia), -17.0265:Gln->pyro-Glu (Pyro-glu from Q)	0		TRUE	TPK1	sp|P06244|KAPA_YEAST	cAMP-dependent protein kinase type 1
20180918_Lumos_RSLC6_Reiter_Ammerer_MFPL_onbead_Tpk1_1_1.14213.14213.2	QPHVTYYNEEQYK		2	2468.38	849.891	878.403	57.0221	57.0241	1754.79	1697.77	0.0001332	19.691	15.051	1	0		57.0215:Gly->Asn (Gly->Asn substitution), 57.0327:Val->Arg (Val->Arg substitution), 57.0215:Gly (Addition of Glycine), 57.0215:Carbamidomethyl (Iodoacetamide derivative), 57.0215:Ala->Gln (Ala->Gln substitution)	0		TRUE	TPK1	sp|P06244|KAPA_YEAST	cAMP-dependent protein kinase type 1
20180918_Lumos_RSLC6_Reiter_Ammerer_MFPL_onbead_Tpk1_1_1.14229.14229.2	QPHVTYYNEEQYK		2	2470.59	849.891	841.876	-16.0305	-16.0285	1681.74	1697.77	2.776e-06	24.677	15.793	1	0		-16.0313:Xle->Pro (Leu/Ile->Pro substitution), -16.0279:Phe->Met (Phe->Met substitution)	0		TRUE	TPK1	sp|P06244|KAPA_YEAST	cAMP-dependent protein kinase type 1
20180918_Lumos_RSLC6_Reiter_Ammerer_MFPL_onbead_Tpk1_1_1.14233.14233.3	QPHVTYYNEEQYK		3	2471.26	566.93	560.926	-18.012	-18.01	1679.76	1697.77	0.1433	20.388	17.885	0.8652	0		-18.0106:Dehydrated (Dehydration), -18.0106:Glu->pyro-Glu (Pyro-glu from E)	0		TRUE	TPK1	sp|P06244|KAPA_YEAST	cAMP-dependent protein kinase type 1
20180918_Lumos_RSLC6_Reiter_Ammerer_MFPL_onbead_Tpk1_1_1.14239.14239.3	QPHVTYYNEEQYK		3	2472.04	566.93	572.934	18.0107	18.0127	1715.78	1697.77	0.001735	26.754	19.197	0.9948	0		Unknown	0		TRUE	TPK1	sp|P06244|KAPA_YEAST	cAMP-dependent protein kinase type 1
20180918_Lumos_RSLC6_Reiter_Ammerer_MFPL_onbead_Tpk1_1_1.14243.14243.2	QPHVTYYNEEQYK		2	2472.81	849.891	841.88	-16.0225	-16.0205	1681.75	1697.77	1.794e-06	24.995	15.813	1	0		-16.0135:Met->Asp (Met->Asp substitution), -16.0279:Phe->Met (Phe->Met substitution)	0		TRUE	TPK1	sp|P06244|KAPA_YEAST	cAMP-dependent protein kinase type 1
20180918_Lumos_RSLC6_Reiter_Ammerer_MFPL_onbead_Tpk1_1_1.14247.14247.2	QPHVTYYNEEQYK		2	2473.42	849.891	876.85	53.9176	53.9196	1751.69	1697.77	0.0009455	17.656	15.488	0.9879	0		53.9193:Cation:Fe[II] (Replacement of 2 protons by iron)	0		TRUE	TPK1	sp|P06244|KAPA_YEAST	cAMP-dependent protein kinase type 1
20180918_Lumos_RSLC6_Reiter_Ammerer_MFPL_onbead_Tpk1_1_1.14255.14255.2	QPHVTYYNEEQYK		2	2474.78	849.891	877.349	54.9149	54.9169	1752.68	1697.77	0.02488	18.142	15.954	0.632	0		Unknown	0		TRUE	TPK1	sp|P06244|KAPA_YEAST	cAMP-dependent protein kinase type 1
20180918_Lumos_RSLC6_Reiter_Ammerer_MFPL_onbead_Tpk1_1_1.14261.14261.2	QPHVTYYNEEQYK		2	2475.75	849.891	842.382	-15.0188	-15.0168	1682.75	1697.77	0.0009903	20.301	15.551	0.9913	0		-15.0109:Lys->Xle (Lys->Leu/Ile substitution), -15.0109:ISD_z+2_ion (ISD (z+2)-series), -15.0109:Ser->LacticAcid (lactic acid from N-term Ser)	0		TRUE	TPK1	sp|P06244|KAPA_YEAST	cAMP-dependent protein kinase type 1
20180918_Lumos_RSLC6_Reiter_Ammerer_MFPL_onbead_Tpk1_1_1.14266.14266.2	QPHVTYYNEEQYK		2	2476.77	849.891	841.884	-16.0149	-16.0129	1681.75	1697.77	1.189e-06	25.067	15.844	1	0		-16.0135:Met->Asp (Met->Asp substitution)	0		TRUE	TPK1	sp|P06244|KAPA_YEAST	cAMP-dependent protein kinase type 1
20180918_Lumos_RSLC6_Reiter_Ammerer_MFPL_onbead_Tpk1_1_1.14270.14270.2	QPHVTYYNEEQYK		2	2477.43	849.891	841.875	-16.0335	-16.0315	1681.73	1697.77	1.321e-06	25.056	15.819	1	0		-16.0313:Xle->Pro (Leu/Ile->Pro substitution), -16.0279:Phe->Met (Phe->Met substitution)	0		TRUE	TPK1	sp|P06244|KAPA_YEAST	cAMP-dependent protein kinase type 1
20180918_Lumos_RSLC6_Reiter_Ammerer_MFPL_onbead_Tpk1_1_1.14308.14308.2	LGNLQNGTEDVK		2	2483.34	644.331	644.33	-0.0012	0.0008	1286.65	1286.65	2.788e-08	33.271	27.905	1	0		Unknown	0		TRUE	TPK1	sp|P06244|KAPA_YEAST	cAMP-dependent protein kinase type 1
20180918_Lumos_RSLC6_Reiter_Ammerer_MFPL_onbead_Tpk1_1_1.14330.14330.2	FPNPVAK		2	2486.74	386.721	386.721	-0.0011	0.0009	771.427	771.428	0.009269	18.244	14.218	0.9997	0		Unknown	0		FALSE	TPK3	sp|P05986|KAPC_YEAST	cAMP-dependent protein kinase type 3	sp|P06244|KAPA_YEAST, sp|P06245|KAPB_YEAST
20180918_Lumos_RSLC6_Reiter_Ammerer_MFPL_onbead_Tpk1_1_1.14366.14366.2	QPHVTYYNEEQYK		2	2492.41	849.891	849.891	-0.0019	0.0001	1697.77	1697.77	5.953e-07	26.444	17.456	1	0		Unknown	0		TRUE	TPK1	sp|P06244|KAPA_YEAST	cAMP-dependent protein kinase type 1
20180918_Lumos_RSLC6_Reiter_Ammerer_MFPL_onbead_Tpk1_1_1.14375.14375.3	QPHVTYYNEEQYK		3	2493.86	566.93	566.929	-0.0017	0.0003	1697.77	1697.77	6.714e-06	31.533	21.354	1	0		Unknown	0		TRUE	TPK1	sp|P06244|KAPA_YEAST	cAMP-dependent protein kinase type 1
20180918_Lumos_RSLC6_Reiter_Ammerer_MFPL_onbead_Tpk1_1_1.14512.14512.2	LGNLQNGTEDVK		2	2515.05	644.331	644.33	-0.0014	0.0006	1286.65	1286.65	7.464e-09	33.216	17.516	1	0		Unknown	0		TRUE	TPK1	sp|P06244|KAPA_YEAST	cAMP-dependent protein kinase type 1
20180918_Lumos_RSLC6_Reiter_Ammerer_MFPL_onbead_Tpk1_1_1.14532.14532.2	FPNPVAK		2	2518.03	386.721	386.72	-0.0017	0.0003	771.426	771.428	0.006154	18.17	14.259	0.9998	0		Unknown	0		FALSE	TPK3	sp|P05986|KAPC_YEAST	cAMP-dependent protein kinase type 3	sp|P06244|KAPA_YEAST, sp|P06245|KAPB_YEAST
20180918_Lumos_RSLC6_Reiter_Ammerer_MFPL_onbead_Tpk1_1_1.14578.14578.3	QPHVTYYNEEQYK		3	2524.49	566.93	567.264	1.0015	1.0035	1698.77	1697.77	0.001102	25.044	17.292	1	0		0.9970:Label:15N(1) (15N(1))	0		TRUE	TPK1	sp|P06244|KAPA_YEAST	cAMP-dependent protein kinase type 1
20180918_Lumos_RSLC6_Reiter_Ammerer_MFPL_onbead_Tpk1_1_1.14590.14590.2	LGNLQNGTEDVK		2	2526.32	644.331	672.841	57.0205	57.0225	1343.67	1286.65	6.805e-06	24.203	13.57	1	0		57.0215:Gly->Asn (Gly->Asn substitution), 57.0215:Gly (Addition of Glycine), 57.0215:Carbamidomethyl (Iodoacetamide derivative), 57.0215:Ala->Gln (Ala->Gln substitution)	0		TRUE	TPK1	sp|P06244|KAPA_YEAST	cAMP-dependent protein kinase type 1
20180918_Lumos_RSLC6_Reiter_Ammerer_MFPL_onbead_Tpk1_1_1.14597.14597.2	LGNLQNGTEDVK		2	2527.27	644.331	645.212	1.7638	1.7658	1288.41	1286.65	3.256e-06	25.222	14.866	1	0		Unknown	0		TRUE	TPK1	sp|P06244|KAPA_YEAST	cAMP-dependent protein kinase type 1
20180918_Lumos_RSLC6_Reiter_Ammerer_MFPL_onbead_Tpk1_1_1.14602.14602.3	EGGETQEKPKQPHVTYYNEEQYK		3	2528.1	928.103	996.114	204.033	204.035	2985.32	2781.29	0.0004715	25.827	19.075	0.9867	0		Unknown	0		TRUE	TPK1	sp|P06244|KAPA_YEAST	cAMP-dependent protein kinase type 1
20180918_Lumos_RSLC6_Reiter_Ammerer_MFPL_onbead_Tpk1_1_1.14620.14620.3	EGGETQEKPKQPHVTYYNEEQYK	EGGET[181]QEKPKQPHVTYYNEEQYK	3	2530.98	954.759	996.28	124.565	124.567	2985.82	2861.25	1.255e-07	33.578	33.521	0.9944	0	5T(79.9663)	Unknown	0		FALSE	TPK1	sp|P06244|KAPA_YEAST	cAMP-dependent protein kinase type 1
20180918_Lumos_RSLC6_Reiter_Ammerer_MFPL_onbead_Tpk1_1_1.14623.14623.2	QPHVTYYNEEQYK		2	2531.39	849.891	849.89	-0.0037	-0.0017	1697.76	1697.77	3.845e-07	26.669	17.767	1	0		Unknown	0		TRUE	TPK1	sp|P06244|KAPA_YEAST	cAMP-dependent protein kinase type 1
20180918_Lumos_RSLC6_Reiter_Ammerer_MFPL_onbead_Tpk1_1_1.14726.14726.2	LGNLQNGTEDVK		2	2547	644.331	644.33	-0.0006	0.0014	1286.65	1286.65	1.531e-08	31.466	15.765	1	0		Unknown	0		TRUE	TPK1	sp|P06244|KAPA_YEAST	cAMP-dependent protein kinase type 1
20180918_Lumos_RSLC6_Reiter_Ammerer_MFPL_onbead_Tpk1_1_1.14749.14749.2	FPNPVAK		2	2550.62	386.721	386.721	-0.0009	0.0011	771.427	771.428	0.009707	18.175	14.213	0.9997	0		Unknown	0		FALSE	TPK3	sp|P05986|KAPC_YEAST	cAMP-dependent protein kinase type 3	sp|P06244|KAPA_YEAST, sp|P06245|KAPB_YEAST
20180918_Lumos_RSLC6_Reiter_Ammerer_MFPL_onbead_Tpk1_1_1.14766.14766.2	QPHVTYYNEEQYK		2	2553.14	849.891	850.892	2.0002	2.0022	1699.77	1697.77	0.0009221	18.729	13.911	0.9997	0		2.0042:Label:18O(1) (O18 Labeling), 1.9941:Label:15N(2) (15N(2)), 1.9979:Glu->Met (Glu->Met substitution)	0		TRUE	TPK1	sp|P06244|KAPA_YEAST	cAMP-dependent protein kinase type 1
20180918_Lumos_RSLC6_Reiter_Ammerer_MFPL_onbead_Tpk1_1_1.14830.14830.2	QPHVTYYNEEQYK		2	2562.62	849.891	849.891	-0.0016	0.0004	1697.77	1697.77	2.593e-07	26.441	17.643	1	0		Unknown	0		TRUE	TPK1	sp|P06244|KAPA_YEAST	cAMP-dependent protein kinase type 1
20180918_Lumos_RSLC6_Reiter_Ammerer_MFPL_onbead_Tpk1_1_1.14886.14886.3	QPHVTYYNEEQYK		3	2570.89	566.93	566.929	-0.0021	-0.0001	1697.77	1697.77	0.002843	25.538	18.554	0.9999	0		Unknown	0		TRUE	TPK1	sp|P06244|KAPA_YEAST	cAMP-dependent protein kinase type 1
20180918_Lumos_RSLC6_Reiter_Ammerer_MFPL_onbead_Tpk1_1_1.14973.14973.2	FPNPVAK		2	2583.18	386.721	386.721	-0.0012	0.0008	771.427	771.428	0.04218	18.229	14.269	0.9988	0		Unknown	0		FALSE	TPK3	sp|P05986|KAPC_YEAST	cAMP-dependent protein kinase type 3	sp|P06244|KAPA_YEAST, sp|P06245|KAPB_YEAST
20180918_Lumos_RSLC6_Reiter_Ammerer_MFPL_onbead_Tpk1_1_1.15008.15008.2	LGNLQNGTEDVK		2	2588.04	644.331	643.851	-0.9601	-0.9581	1285.69	1286.65	3.056	14.59	14.578	0.3511	0		-0.9589:Asn->Xle (Asn->Leu/Ile substitution)	0		TRUE	TPK1	sp|P06244|KAPA_YEAST	cAMP-dependent protein kinase type 1
20180918_Lumos_RSLC6_Reiter_Ammerer_MFPL_onbead_Tpk1_1_1.15071.15071.2	LGNLQNGTEDVK		2	2599.33	644.331	643.851	-0.9604	-0.9584	1285.69	1286.65	0.0001084	20.939	12.714	1	0		-0.9589:Asn->Xle (Asn->Leu/Ile substitution)	0		TRUE	TPK1	sp|P06244|KAPA_YEAST	cAMP-dependent protein kinase type 1
20180918_Lumos_RSLC6_Reiter_Ammerer_MFPL_onbead_Tpk1_1_1.15079.15079.2	QPHVTYYNEEQYK		2	2600.8	849.891	850.394	1.005	1.007	1698.77	1697.77	1.017e-06	26.892	18.107	1	0		0.9970:Label:15N(1) (15N(1))	0		TRUE	TPK1	sp|P06244|KAPA_YEAST	cAMP-dependent protein kinase type 1
20180918_Lumos_RSLC6_Reiter_Ammerer_MFPL_onbead_Tpk1_1_1.15098.15098.3	QPHVTYYNEEQYK		3	2603.56	566.93	567.264	1.0031	1.0051	1698.77	1697.77	0.06309	19.257	16.784	0.9993	0		0.9970:Label:15N(1) (15N(1))	0		TRUE	TPK1	sp|P06244|KAPA_YEAST	cAMP-dependent protein kinase type 1
20180918_Lumos_RSLC6_Reiter_Ammerer_MFPL_onbead_Tpk1_1_1.15112.15112.2	TLGTGSFGR		2	2605.79	448.235	448.235	-0.0011	0.0009	894.455	894.456	0.001301	19.093	15.489	0.9999	0		Unknown	0		FALSE	TPK3	sp|P05986|KAPC_YEAST	cAMP-dependent protein kinase type 3	sp|P06245|KAPB_YEAST, sp|P06244|KAPA_YEAST
20180918_Lumos_RSLC6_Reiter_Ammerer_MFPL_onbead_Tpk1_1_1.15137.15137.2	TLGTGSFGR		2	2609.72	448.235	426.222	-44.0272	-44.0252	850.429	894.456	0.1327	17.062	14.517	0.8691	0		-44.0262:Thr->Gly (Thr->Gly substitution)	0		FALSE	TPK3	sp|P05986|KAPC_YEAST	cAMP-dependent protein kinase type 3	sp|P06244|KAPA_YEAST, sp|P06245|KAPB_YEAST
20180918_Lumos_RSLC6_Reiter_Ammerer_MFPL_onbead_Tpk1_1_1.15171.15171.2	FPNPVAK		2	2614.58	386.721	386.721	-0.0008	0.0012	771.427	771.428	2.036	16.888	15.337	0.9596	0		Unknown	0		FALSE	TPK3	sp|P05986|KAPC_YEAST	cAMP-dependent protein kinase type 3	sp|P06244|KAPA_YEAST, sp|P06245|KAPB_YEAST
20180918_Lumos_RSLC6_Reiter_Ammerer_MFPL_onbead_Tpk1_1_1.15172.15172.2	TLGTGSFGR		2	2614.66	448.235	439.23	-18.0113	-18.0093	876.445	894.456	0.0003107	20.631	14.915	0.9992	0		-18.0106:Dehydrated (Dehydration), -18.0106:Glu->pyro-Glu (Pyro-glu from E)	0		FALSE	TPK3	sp|P05986|KAPC_YEAST	cAMP-dependent protein kinase type 3	sp|P06244|KAPA_YEAST, sp|P06245|KAPB_YEAST
20180918_Lumos_RSLC6_Reiter_Ammerer_MFPL_onbead_Tpk1_1_1.15180.15180.2	TLGTGSFGR		2	2615.68	448.235	398.213	-100.045	-100.043	794.411	894.456	0.0334	17.889	14.131	0.9257	0		Unknown	0		FALSE	TPK3	sp|P05986|KAPC_YEAST	cAMP-dependent protein kinase type 3	sp|P06245|KAPB_YEAST, sp|P06244|KAPA_YEAST
20180918_Lumos_RSLC6_Reiter_Ammerer_MFPL_onbead_Tpk1_1_1.15185.15185.2	LGNLQNGTEDVK	LGNLQNGT[181]EDVK	2	2616.4	684.314	635.816	-96.9948	-96.9928	1269.62	1366.61	1.201	17.35	15.65	0.2991	0	8T(79.9663)	Unknown	0		FALSE	TPK1	sp|P06244|KAPA_YEAST	cAMP-dependent protein kinase type 1
20180918_Lumos_RSLC6_Reiter_Ammerer_MFPL_onbead_Tpk1_1_1.15199.15199.2	LGNLQNGTEDVK		2	2618.61	644.331	644.33	-0.0016	0.0004	1286.64	1286.65	2.577e-08	30.93	16.374	1	0		Unknown	0		TRUE	TPK1	sp|P06244|KAPA_YEAST	cAMP-dependent protein kinase type 1
20180918_Lumos_RSLC6_Reiter_Ammerer_MFPL_onbead_Tpk1_1_1.15280.15280.2	QPHVTYYNEEQYK		2	2631.26	849.891	850.392	1.0013	1.0033	1698.77	1697.77	5.854e-05	25.196	17.68	1	0		0.9970:Label:15N(1) (15N(1))	0		TRUE	TPK1	sp|P06244|KAPA_YEAST	cAMP-dependent protein kinase type 1
20180918_Lumos_RSLC6_Reiter_Ammerer_MFPL_onbead_Tpk1_1_1.15303.15303.3	QPHVTYYNEEQYK		3	2634.92	566.93	567.264	1.002	1.004	1698.77	1697.77	0.003788	23.853	17.158	0.9999	0		0.9970:Label:15N(1) (15N(1))	0		TRUE	TPK1	sp|P06244|KAPA_YEAST	cAMP-dependent protein kinase type 1
20180918_Lumos_RSLC6_Reiter_Ammerer_MFPL_onbead_Tpk1_1_1.15315.15315.2	TLGTGSFGR		2	2636.55	448.235	448.235	-0.0009	0.0011	894.455	894.456	0.0007208	18.107	13.398	1	0		Unknown	0		FALSE	TPK3	sp|P05986|KAPC_YEAST	cAMP-dependent protein kinase type 3	sp|P06244|KAPA_YEAST, sp|P06245|KAPB_YEAST
20180918_Lumos_RSLC6_Reiter_Ammerer_MFPL_onbead_Tpk1_1_1.15342.15342.2	LGNLQNGTEDVK		2	2640.6	644.331	644.822	0.9834	0.9854	1287.63	1286.65	1.016e-06	28.344	15.701	1	0		0.9840:Deamidated (Deamidation), 0.9840:Asn->Asp (Asn->Asp substitution), 0.9840:Gln->Glu (Gln->Glu substitution)	0		TRUE	TPK1	sp|P06244|KAPA_YEAST	cAMP-dependent protein kinase type 1
20180918_Lumos_RSLC6_Reiter_Ammerer_MFPL_onbead_Tpk1_1_1.15400.15400.2	TLGTGSFGR		2	2649.19	448.235	439.23	-18.0113	-18.0093	876.445	894.456	0.0004819	19.381	12.519	0.9976	0		-18.0106:Dehydrated (Dehydration), -18.0106:Glu->pyro-Glu (Pyro-glu from E)	0		FALSE	TPK3	sp|P05986|KAPC_YEAST	cAMP-dependent protein kinase type 3	sp|P06244|KAPA_YEAST, sp|P06245|KAPB_YEAST
20180918_Lumos_RSLC6_Reiter_Ammerer_MFPL_onbead_Tpk1_1_1.15453.15453.2	QPHVTYYNEEQYK		2	2657.66	849.891	849.891	-0.0012	0.0008	1697.77	1697.77	2.68e-05	25.039	15.878	1	0		Unknown	0		TRUE	TPK1	sp|P06244|KAPA_YEAST	cAMP-dependent protein kinase type 1
20180918_Lumos_RSLC6_Reiter_Ammerer_MFPL_onbead_Tpk1_1_1.15509.15509.3	QPHVTYYNEEQYK		3	2665.98	566.93	566.93	-0.0014	0.0006	1697.77	1697.77	0.04195	19.52	15.986	0.9986	0		Unknown	0		TRUE	TPK1	sp|P06244|KAPA_YEAST	cAMP-dependent protein kinase type 1
20180918_Lumos_RSLC6_Reiter_Ammerer_MFPL_onbead_Tpk1_1_1.15518.15518.2	TLGTGSFGR		2	2667.2	448.235	448.235	-0.0012	0.0008	894.455	894.456	0.0008277	19.023	15.491	0.9999	0		Unknown	0		FALSE	TPK3	sp|P05986|KAPC_YEAST	cAMP-dependent protein kinase type 3	sp|P06244|KAPA_YEAST, sp|P06245|KAPB_YEAST
20180918_Lumos_RSLC6_Reiter_Ammerer_MFPL_onbead_Tpk1_1_1.15556.15556.2	LGNLQNGTEDVK		2	2672.89	644.331	644.33	-0.0014	0.0006	1286.65	1286.65	1.785e-08	31.377	15.996	1	0		Unknown	0		TRUE	TPK1	sp|P06244|KAPA_YEAST	cAMP-dependent protein kinase type 1
20180918_Lumos_RSLC6_Reiter_Ammerer_MFPL_onbead_Tpk1_1_1.15610.15610.2	FPNPVAK		2	2680.68	386.721	386.697	-0.049	-0.047	771.379	771.428	2.498	14.841	14.324	0.9551	0		Unknown	0		FALSE	TPK3	sp|P05986|KAPC_YEAST	cAMP-dependent protein kinase type 3	sp|P06244|KAPA_YEAST, sp|P06245|KAPB_YEAST
20180918_Lumos_RSLC6_Reiter_Ammerer_MFPL_onbead_Tpk1_1_1.15614.15614.3	EGGETQEKPKQPHVTYYNEEQYK		3	2681.25	928.103	942.772	44.0063	44.0083	2825.29	2781.29	1.383e-13	53.976	44.179	1	0		44.0085:Delta:H(4)C(2)O(-1)S(1) (S-Ethylcystine from Serine), 44.0085:Ser->Met (Ser->Met substitution), 44.0173:Acetyl:13C(2) (heavy acetylation)	0		TRUE	TPK1	sp|P06244|KAPA_YEAST	cAMP-dependent protein kinase type 1
20180918_Lumos_RSLC6_Reiter_Ammerer_MFPL_onbead_Tpk1_1_1.15619.15619.3	QPHVTYYNEEQYK		3	2682.04	566.93	567.258	0.9834	0.9854	1698.75	1697.77	0.07155	21.092	17.041	0.9992	0		0.9840:Deamidated (Deamidation), 0.9840:Asn->Asp (Asn->Asp substitution), 0.9840:Gln->Glu (Gln->Glu substitution)	0		TRUE	TPK1	sp|P06244|KAPA_YEAST	cAMP-dependent protein kinase type 1
20180918_Lumos_RSLC6_Reiter_Ammerer_MFPL_onbead_Tpk1_1_1.15650.15650.2	QPHVTYYNEEQYK		2	2686.93	849.891	850.383	0.9819	0.9839	1698.75	1697.77	5.608e-05	20.304	13.93	1	0		0.9840:Deamidated (Deamidation), 0.9840:Asn->Asp (Asn->Asp substitution), 0.9840:Gln->Glu (Gln->Glu substitution)	0		TRUE	TPK1	sp|P06244|KAPA_YEAST	cAMP-dependent protein kinase type 1
20180918_Lumos_RSLC6_Reiter_Ammerer_MFPL_onbead_Tpk1_1_1.15654.15654.2	TLGTGSFGR		2	2687.48	448.235	448.781	1.092	1.094	895.548	894.456	0.0007606	19.056	15.502	0.9999	0		Unknown	0		FALSE	TPK3	sp|P05986|KAPC_YEAST	cAMP-dependent protein kinase type 3	sp|P06244|KAPA_YEAST, sp|P06245|KAPB_YEAST
20180918_Lumos_RSLC6_Reiter_Ammerer_MFPL_onbead_Tpk1_1_1.15725.15725.2	TLGTGSFGR		2	2698.12	448.235	448.235	-0.0011	0.0009	894.455	894.456	0.0002991	19.063	15.489	1	0		Unknown	0		FALSE	TPK3	sp|P05986|KAPC_YEAST	cAMP-dependent protein kinase type 3	sp|P06244|KAPA_YEAST, sp|P06245|KAPB_YEAST
20180918_Lumos_RSLC6_Reiter_Ammerer_MFPL_onbead_Tpk1_1_1.15739.15739.3	QPHVTYYNEEQYK		3	2700.18	566.93	566.93	-0.001	0.001	1697.77	1697.77	0.0291	21.791	17.041	0.999	0		Unknown	0		TRUE	TPK1	sp|P06244|KAPA_YEAST	cAMP-dependent protein kinase type 1
20180918_Lumos_RSLC6_Reiter_Ammerer_MFPL_onbead_Tpk1_1_1.15770.15770.2	LGNLQNGTEDVK		2	2704.56	644.331	644.822	0.9823	0.9843	1287.63	1286.65	1.613e-05	25.309	15.292	1	0		0.9840:Deamidated (Deamidation), 0.9840:Asn->Asp (Asn->Asp substitution), 0.9840:Gln->Glu (Gln->Glu substitution)	0		TRUE	TPK1	sp|P06244|KAPA_YEAST	cAMP-dependent protein kinase type 1
20180918_Lumos_RSLC6_Reiter_Ammerer_MFPL_onbead_Tpk1_1_1.15792.15792.2	QPHVTYYNEEQYK		2	2707.58	849.891	849.891	-0.0006	0.0014	1697.77	1697.77	4.126e-05	23.069	14.713	1	0		Unknown	0		TRUE	TPK1	sp|P06244|KAPA_YEAST	cAMP-dependent protein kinase type 1
20180918_Lumos_RSLC6_Reiter_Ammerer_MFPL_onbead_Tpk1_1_1.15835.15835.3	LGNLQNGTEDVK		3	2713.54	429.889	438.203	24.9399	24.9419	1311.59	1286.65	0.5383	18.98	16.925	0.3908	0		Unknown	0		FALSE	TPK1	sp|P06244|KAPA_YEAST	cAMP-dependent protein kinase type 1
20180918_Lumos_RSLC6_Reiter_Ammerer_MFPL_onbead_Tpk1_1_1.15840.15840.2	QPHVTYYNEEQYK		2	2714.16	849.891	668.805	-362.173	-362.171	1335.6	1697.77	0.006536	18.732	16.443	0.9758	0		Unknown	0		TRUE	TPK1	sp|P06244|KAPA_YEAST	cAMP-dependent protein kinase type 1
20180918_Lumos_RSLC6_Reiter_Ammerer_MFPL_onbead_Tpk1_1_1.15882.15882.2	LGNLQNGSEDVK		2	2720.44	637.323	637.811	0.976	0.978	1273.61	1272.63	1.03	15.48	13.014	0.972	0		0.9840:Deamidated (Deamidation), 0.9840:Asn->Asp (Asn->Asp substitution), 0.9840:Gln->Glu (Gln->Glu substitution)	0		TRUE	TPK3	sp|P05986|KAPC_YEAST	cAMP-dependent protein kinase type 3
20180918_Lumos_RSLC6_Reiter_Ammerer_MFPL_onbead_Tpk1_1_1.15889.15889.2	LGNLQNGSEDVK		2	2721.46	637.323	637.811	0.9769	0.9789	1273.61	1272.63	1.075	15.451	13.193	0.9709	0		0.9840:Deamidated (Deamidation), 0.9840:Asn->Asp (Asn->Asp substitution), 0.9840:Gln->Glu (Gln->Glu substitution)	0		TRUE	TPK3	sp|P05986|KAPC_YEAST	cAMP-dependent protein kinase type 3
20180918_Lumos_RSLC6_Reiter_Ammerer_MFPL_onbead_Tpk1_1_1.15896.15896.2	LGNLQNGTEDVK		2	2722.52	644.331	635.817	-17.0274	-17.0254	1269.62	1286.65	0.07769	18.538	15.669	0.9857	0		-17.0265:Gln->pyro-Glu (Pyro-glu from Q), -17.0265:Ammonia-loss (Loss of ammonia)	0		TRUE	TPK1	sp|P06244|KAPA_YEAST	cAMP-dependent protein kinase type 1
20180918_Lumos_RSLC6_Reiter_Ammerer_MFPL_onbead_Tpk1_1_1.15937.15937.2	TLGTGSFGR		2	2728.88	448.235	448.235	-0.0009	0.0011	894.455	894.456	0.0002512	19.055	15.516	1	0		Unknown	0		FALSE	TPK3	sp|P05986|KAPC_YEAST	cAMP-dependent protein kinase type 3	sp|P06244|KAPA_YEAST, sp|P06245|KAPB_YEAST
20180918_Lumos_RSLC6_Reiter_Ammerer_MFPL_onbead_Tpk1_1_1.15987.15987.3	QPHVTYYNEEQYK		3	2736.11	566.93	567.258	0.9842	0.9862	1698.75	1697.77	0.06628	18.959	16.947	0.9992	0		0.9840:Deamidated (Deamidation), 0.9840:Asn->Asp (Asn->Asp substitution), 0.9840:Gln->Glu (Gln->Glu substitution)	0		TRUE	TPK1	sp|P06244|KAPA_YEAST	cAMP-dependent protein kinase type 1
20180918_Lumos_RSLC6_Reiter_Ammerer_MFPL_onbead_Tpk1_1_1.15996.15996.2	LGNLQNGTEDVK		2	2737.33	644.331	644.822	0.9822	0.9842	1287.63	1286.65	0.01444	19.139	15.259	0.9994	0		0.9840:Deamidated (Deamidation), 0.9840:Asn->Asp (Asn->Asp substitution), 0.9840:Gln->Glu (Gln->Glu substitution)	0		TRUE	TPK1	sp|P06244|KAPA_YEAST	cAMP-dependent protein kinase type 1
20180918_Lumos_RSLC6_Reiter_Ammerer_MFPL_onbead_Tpk1_1_1.16105.16105.3	QPHVTYYNEEQYK		3	2752.9	566.93	567.592	1.9864	1.9884	1699.75	1697.77	0.02075	21.425	16.931	0.9975	0		1.9979:Glu->Met (Glu->Met substitution), 1.9793:Val->Thr (Val->Thr substitution), 1.9941:Label:15N(2) (15N(2))	0		TRUE	TPK1	sp|P06244|KAPA_YEAST	cAMP-dependent protein kinase type 1
20180918_Lumos_RSLC6_Reiter_Ammerer_MFPL_onbead_Tpk1_1_1.16152.16152.2	TLGTGSFGR		2	2759.37	448.235	448.235	-0.0012	0.0008	894.455	894.456	0.003816	18.149	13.412	0.9999	0		Unknown	0		FALSE	TPK3	sp|P05986|KAPC_YEAST	cAMP-dependent protein kinase type 3	sp|P06244|KAPA_YEAST, sp|P06245|KAPB_YEAST
20180918_Lumos_RSLC6_Reiter_Ammerer_MFPL_onbead_Tpk1_1_1.16213.16213.2	LGNLQNGTEDVK		2	2768.05	644.331	644.822	0.982	0.984	1287.63	1286.65	0.00188	21.05	15.413	0.9999	0		0.9840:Deamidated (Deamidation), 0.9840:Asn->Asp (Asn->Asp substitution), 0.9840:Gln->Glu (Gln->Glu substitution)	0		TRUE	TPK1	sp|P06244|KAPA_YEAST	cAMP-dependent protein kinase type 1
20180918_Lumos_RSLC6_Reiter_Ammerer_MFPL_onbead_Tpk1_1_1.16214.16214.2	TLGTGSFGR		2	2768.32	448.235	448.723	0.9756	0.9776	895.431	894.456	0.02175	16.472	13.152	0.999	0		0.9840:Asn->Asp (Asn->Asp substitution), 0.9840:Gln->Glu (Gln->Glu substitution), 0.9840:Deamidated (Deamidation)	0		FALSE	TPK3	sp|P05986|KAPC_YEAST	cAMP-dependent protein kinase type 3	sp|P06244|KAPA_YEAST, sp|P06245|KAPB_YEAST
20180918_Lumos_RSLC6_Reiter_Ammerer_MFPL_onbead_Tpk1_1_1.16395.16395.2	LGNLQNGTEDVK		2	2796.46	644.331	644.271	-0.1199	-0.1179	1286.53	1286.65	1.622	15.153	13.928	0.965	0		Unknown	0		TRUE	TPK1	sp|P06244|KAPA_YEAST	cAMP-dependent protein kinase type 1
20180918_Lumos_RSLC6_Reiter_Ammerer_MFPL_onbead_Tpk1_1_1.16457.16457.2	TLGTGSFGR		2	2807.56	448.235	448.235	-0.0009	0.0011	894.455	894.456	0.01177	16.869	13.432	0.9996	0		Unknown	0		FALSE	TPK3	sp|P05986|KAPC_YEAST	cAMP-dependent protein kinase type 3	sp|P06244|KAPA_YEAST, sp|P06245|KAPB_YEAST
20180918_Lumos_RSLC6_Reiter_Ammerer_MFPL_onbead_Tpk1_1_1.16528.16528.2	TLGTGSFGR		2	2817.83	448.235	448.226	-0.0194	-0.0174	894.436	894.456	0.003752	18.154	16.732	0.9999	0		Unknown	0		FALSE	TPK3	sp|P05986|KAPC_YEAST	cAMP-dependent protein kinase type 3	sp|P06244|KAPA_YEAST, sp|P06245|KAPB_YEAST
20180918_Lumos_RSLC6_Reiter_Ammerer_MFPL_onbead_Tpk1_1_1.16551.16551.2	LGNLQNGTEDVK		2	2820.61	644.331	644.822	0.9817	0.9837	1287.63	1286.65	0.000154	23.399	15.427	1	0		0.9840:Deamidated (Deamidation), 0.9840:Asn->Asp (Asn->Asp substitution), 0.9840:Gln->Glu (Gln->Glu substitution)	0		TRUE	TPK1	sp|P06244|KAPA_YEAST	cAMP-dependent protein kinase type 1
20180918_Lumos_RSLC6_Reiter_Ammerer_MFPL_onbead_Tpk1_1_1.16788.16788.2	LGNLQNGTEDVK		2	2853.54	644.331	644.822	0.9819	0.9839	1287.63	1286.65	0.0005048	23.175	15.16	1	0		0.9840:Asn->Asp (Asn->Asp substitution), 0.9840:Gln->Glu (Gln->Glu substitution), 0.9840:Deamidated (Deamidation)	0		TRUE	TPK1	sp|P06244|KAPA_YEAST	cAMP-dependent protein kinase type 1
20180918_Lumos_RSLC6_Reiter_Ammerer_MFPL_onbead_Tpk1_1_1.17009.17009.2	LGNLQNGTEDVK		2	2884.58	644.331	644.822	0.9819	0.9839	1287.63	1286.65	6.641e-05	25.695	17.049	1	0		0.9840:Asn->Asp (Asn->Asp substitution), 0.9840:Gln->Glu (Gln->Glu substitution), 0.9840:Deamidated (Deamidation)	0		TRUE	TPK1	sp|P06244|KAPA_YEAST	cAMP-dependent protein kinase type 1
20180918_Lumos_RSLC6_Reiter_Ammerer_MFPL_onbead_Tpk1_1_1.17170.17170.2	TLGTGSFGR		2	2907.22	448.235	448.235	-0.001	0.001	894.455	894.456	1.752	16.983	15.447	0.9632	0		Unknown	0		FALSE	TPK3	sp|P05986|KAPC_YEAST	cAMP-dependent protein kinase type 3	sp|P06244|KAPA_YEAST, sp|P06245|KAPB_YEAST
20180918_Lumos_RSLC6_Reiter_Ammerer_MFPL_onbead_Tpk1_1_1.17306.17306.2	LGNLQNGTEDVK		2	2926.26	644.331	644.822	0.9824	0.9844	1287.63	1286.65	6.991e-05	25.643	17.034	1	0		0.9840:Deamidated (Deamidation), 0.9840:Asn->Asp (Asn->Asp substitution), 0.9840:Gln->Glu (Gln->Glu substitution)	0		TRUE	TPK1	sp|P06244|KAPA_YEAST	cAMP-dependent protein kinase type 1
20180918_Lumos_RSLC6_Reiter_Ammerer_MFPL_onbead_Tpk1_1_1.17346.17346.3	TLGTGSFGR		3	2932.31	299.159	448.235	447.228	447.231	1341.68	894.456	0.1263	18.347	15.481	0.3667	0		Unknown	0		FALSE	TPK3	sp|P05986|KAPC_YEAST	cAMP-dependent protein kinase type 3	sp|P06244|KAPA_YEAST, sp|P06245|KAPB_YEAST
20180918_Lumos_RSLC6_Reiter_Ammerer_MFPL_onbead_Tpk1_1_1.17591.17591.2	TLGTGSFGR		2	2967.95	448.235	448.235	-0.0001	0.0019	894.456	894.456	0.01042	17.082	13.429	0.9996	0		Unknown	0		FALSE	TPK3	sp|P05986|KAPC_YEAST	cAMP-dependent protein kinase type 3	sp|P06244|KAPA_YEAST, sp|P06245|KAPB_YEAST
20180918_Lumos_RSLC6_Reiter_Ammerer_MFPL_onbead_Tpk1_1_1.17781.17781.2	LGNLQNGTEDVK		2	2996.53	644.331	644.822	0.9823	0.9843	1287.63	1286.65	9.523e-07	28.158	15.53	1	0		0.9840:Deamidated (Deamidation), 0.9840:Asn->Asp (Asn->Asp substitution), 0.9840:Gln->Glu (Gln->Glu substitution)	0		TRUE	TPK1	sp|P06244|KAPA_YEAST	cAMP-dependent protein kinase type 1
20180918_Lumos_RSLC6_Reiter_Ammerer_MFPL_onbead_Tpk1_1_1.17842.17842.2	LGNLQNGTEDVK		2	3005.19	644.331	645.333	2.0042	2.0062	1288.65	1286.65	0.6558	15.852	13.637	0.9235	0		2.0042:Label:18O(1) (O18 Labeling), 1.9979:Glu->Met (Glu->Met substitution), 2.0156:Pro->Val (Pro->Val substitution)	0		TRUE	TPK1	sp|P06244|KAPA_YEAST	cAMP-dependent protein kinase type 1
20180918_Lumos_RSLC6_Reiter_Ammerer_MFPL_onbead_Tpk1_1_1.17993.17993.2	TLGTGSFGR		2	3026.85	448.235	448.235	-0.0009	0.0011	894.455	894.456	0.9569	14.532	12.982	0.9779	0		Unknown	0		FALSE	TPK3	sp|P05986|KAPC_YEAST	cAMP-dependent protein kinase type 3	sp|P06244|KAPA_YEAST, sp|P06245|KAPB_YEAST
20180918_Lumos_RSLC6_Reiter_Ammerer_MFPL_onbead_Tpk1_1_1.18049.18049.2	LGNLQNGTEDVK		2	3035.04	644.331	644.822	0.9823	0.9843	1287.63	1286.65	1.41e-06	28.358	16.716	1	0		0.9840:Gln->Glu (Gln->Glu substitution), 0.9840:Deamidated (Deamidation), 0.9840:Asn->Asp (Asn->Asp substitution)	0		TRUE	TPK1	sp|P06244|KAPA_YEAST	cAMP-dependent protein kinase type 1
20180918_Lumos_RSLC6_Reiter_Ammerer_MFPL_onbead_Tpk1_1_1.18064.18064.2	LKQVEHTNDER		2	3037.14	684.847	684.859	0.0249	0.0269	1367.7	1367.68	0.01659	18.618	14.398	0.9949	0		0.0364:Gln->Lys (Gln->Lys substitution)	0		FALSE	TPK3	sp|P05986|KAPC_YEAST	cAMP-dependent protein kinase type 3	sp|P06244|KAPA_YEAST
20180918_Lumos_RSLC6_Reiter_Ammerer_MFPL_onbead_Tpk1_1_1.18137.18137.2	QFIAQAR		2	3047.96	417.235	417.711	0.9513	0.9533	833.407	832.456	3.311	15.725	14.127	0.9409	0		0.9589:Xle->Asn (Leu/Ile->Asn substitution), 0.9476:Lys->Glu (Lys->Glu substitution)	0		TRUE	TPK1	sp|P06244|KAPA_YEAST	cAMP-dependent protein kinase type 1
20180918_Lumos_RSLC6_Reiter_Ammerer_MFPL_onbead_Tpk1_1_1.18517.18517.2	LGNLQNGTEDVK		2	3101.43	644.331	644.822	0.9825	0.9845	1287.63	1286.65	1.17e-05	24.234	14.492	1	0		0.9840:Gln->Glu (Gln->Glu substitution), 0.9840:Deamidated (Deamidation), 0.9840:Asn->Asp (Asn->Asp substitution)	0		TRUE	TPK1	sp|P06244|KAPA_YEAST	cAMP-dependent protein kinase type 1
20180918_Lumos_RSLC6_Reiter_Ammerer_MFPL_onbead_Tpk1_1_1.18732.18732.2	LGNLQNGTEDVK		2	3131.05	644.331	645.314	1.9663	1.9683	1288.61	1286.65	0.009377	18.212	13.52	0.9981	0		1.9615:Thr->Cys (Thr->Cys substitution)	0		TRUE	TPK1	sp|P06244|KAPA_YEAST	cAMP-dependent protein kinase type 1
20180918_Lumos_RSLC6_Reiter_Ammerer_MFPL_onbead_Tpk1_1_1.18864.18864.2	TLGTGSFGR		2	3150.08	448.235	448.711	0.9507	0.9527	895.407	894.456	0.03567	15.115	14.229	0.9987	0		0.9589:Xle->Asn (Leu/Ile->Asn substitution), 0.9476:Lys->Glu (Lys->Glu substitution)	0		FALSE	TPK3	sp|P05986|KAPC_YEAST	cAMP-dependent protein kinase type 3	sp|P06244|KAPA_YEAST, sp|P06245|KAPB_YEAST
20180918_Lumos_RSLC6_Reiter_Ammerer_MFPL_onbead_Tpk1_1_1.18865.18865.2	LGNLQNGTEDVK		2	3150.2	644.331	644.824	0.9861	0.9881	1287.63	1286.65	1.6e-05	23.831	23.262	1	0		0.9840:Asn->Asp (Asn->Asp substitution), 0.9840:Gln->Glu (Gln->Glu substitution), 0.9970:Label:15N(1) (15N(1)), 0.9840:Deamidated (Deamidation)	0		TRUE	TPK1	sp|P06244|KAPA_YEAST	cAMP-dependent protein kinase type 1
20180918_Lumos_RSLC6_Reiter_Ammerer_MFPL_onbead_Tpk1_1_1.19079.19079.2	LGNLQNGTEDVK		2	3179.73	644.331	645.308	1.9541	1.9561	1288.6	1286.65	0.12	18.087	15.012	0.9905	0		1.9615:Thr->Cys (Thr->Cys substitution)	0		TRUE	TPK1	sp|P06244|KAPA_YEAST	cAMP-dependent protein kinase type 1
20180918_Lumos_RSLC6_Reiter_Ammerer_MFPL_onbead_Tpk1_1_1.19126.19126.2	LGNLQNGTEDVK		2	3186.07	644.331	644.821	0.9807	0.9827	1287.63	1286.65	1.638e-05	23.919	15.209	1	0		0.9840:Asn->Asp (Asn->Asp substitution), 0.9840:Gln->Glu (Gln->Glu substitution), 0.9840:Deamidated (Deamidation)	0		TRUE	TPK1	sp|P06244|KAPA_YEAST	cAMP-dependent protein kinase type 1
20180918_Lumos_RSLC6_Reiter_Ammerer_MFPL_onbead_Tpk1_1_1.19182.19182.2	TLGTGSFGR		2	3193.58	448.235	448.71	0.9504	0.9524	895.406	894.456	4.848	15.342	14.332	0.9333	0		0.9589:Xle->Asn (Leu/Ile->Asn substitution), 0.9476:Lys->Glu (Lys->Glu substitution)	0		FALSE	TPK3	sp|P05986|KAPC_YEAST	cAMP-dependent protein kinase type 3	sp|P06244|KAPA_YEAST, sp|P06245|KAPB_YEAST
20180918_Lumos_RSLC6_Reiter_Ammerer_MFPL_onbead_Tpk1_1_1.19470.19470.2	LGNLQNGTEDVK		2	3233.82	644.331	644.822	0.9833	0.9853	1287.63	1286.65	4.717e-06	25.856	25.254	1	0		0.9840:Deamidated (Deamidation), 0.9840:Asn->Asp (Asn->Asp substitution), 0.9840:Gln->Glu (Gln->Glu substitution)	0		TRUE	TPK1	sp|P06244|KAPA_YEAST	cAMP-dependent protein kinase type 1
20180918_Lumos_RSLC6_Reiter_Ammerer_MFPL_onbead_Tpk1_1_1.19888.19888.2	LGNLQNGTEDVK		2	3291.58	644.331	644.822	0.9831	0.9851	1287.63	1286.65	0.0001506	24.495	16.878	1	0		0.9840:Asn->Asp (Asn->Asp substitution), 0.9840:Gln->Glu (Gln->Glu substitution), 0.9840:Deamidated (Deamidation)	0		TRUE	TPK1	sp|P06244|KAPA_YEAST	cAMP-dependent protein kinase type 1
20180918_Lumos_RSLC6_Reiter_Ammerer_MFPL_onbead_Tpk1_1_1.20184.20184.2	LGNLQNGTEDVK		2	3332.36	644.331	644.331	0	0.002	1286.65	1286.65	4.367e-05	22.189	14.068	1	0		Unknown	0		TRUE	TPK1	sp|P06244|KAPA_YEAST	cAMP-dependent protein kinase type 1
20180918_Lumos_RSLC6_Reiter_Ammerer_MFPL_onbead_Tpk1_1_1.20760.20760.4	DLKPENILLDKNGHIK		4	3413.14	462.515	462.766	1.002	1.004	1847.03	1846.03	1.428e-07	42.358	20.337	1	0		0.9970:Label:15N(1) (15N(1))	0		FALSE	TPK3	sp|P05986|KAPC_YEAST	cAMP-dependent protein kinase type 3	sp|P06244|KAPA_YEAST
20180918_Lumos_RSLC6_Reiter_Ammerer_MFPL_onbead_Tpk1_1_1.20799.20799.3	DLKPENILLDKNGHIK		3	3418.47	616.351	616.35	-0.0025	-0.0005	1846.03	1846.03	1.307e-07	39.712	18.667	1	0		Unknown	0		FALSE	TPK3	sp|P05986|KAPC_YEAST	cAMP-dependent protein kinase type 3	sp|P06244|KAPA_YEAST
20180918_Lumos_RSLC6_Reiter_Ammerer_MFPL_onbead_Tpk1_1_1.21778.21778.2	QPHVTYYNEEQYK		2	3553.65	849.891	841.377	-17.0287	-17.0267	1680.74	1697.77	6.355e-06	24.712	15.71	1	0		-17.0265:Gln->pyro-Glu (Pyro-glu from Q), -17.0265:Ammonia-loss (Loss of ammonia)	0		TRUE	TPK1	sp|P06244|KAPA_YEAST	cAMP-dependent protein kinase type 1
20180918_Lumos_RSLC6_Reiter_Ammerer_MFPL_onbead_Tpk1_1_1.21839.21839.2	QPHVTYYNEEQYK		2	3562.17	849.891	870.39	40.9961	40.9981	1738.76	1697.77	0.01891	17.633	13.329	0.8992	0		41.0014:AzidoF (Azidophenylalanine)	0		TRUE	TPK1	sp|P06244|KAPA_YEAST	cAMP-dependent protein kinase type 1
20180918_Lumos_RSLC6_Reiter_Ammerer_MFPL_onbead_Tpk1_1_1.21889.21889.2	QPHVTYYNEEQYK		2	3569.04	849.891	870.391	40.9988	41.0008	1738.77	1697.77	0.001131	20.435	15.632	0.9891	0		41.0014:AzidoF (Azidophenylalanine)	0		TRUE	TPK1	sp|P06244|KAPA_YEAST	cAMP-dependent protein kinase type 1
20180918_Lumos_RSLC6_Reiter_Ammerer_MFPL_onbead_Tpk1_1_1.21998.21998.2	QPHVTYYNEEQYK		2	3584.08	849.891	841.377	-17.0299	-17.0279	1680.74	1697.77	3.332e-06	24.937	15.725	1	0		-17.0265:Ammonia-loss (Loss of ammonia), -17.0265:Gln->pyro-Glu (Pyro-glu from Q)	0		TRUE	TPK1	sp|P06244|KAPA_YEAST	cAMP-dependent protein kinase type 1
20180918_Lumos_RSLC6_Reiter_Ammerer_MFPL_onbead_Tpk1_1_1.22099.22099.2	DLKPENILLDKNGHIK		2	3598.17	924.023	924.513	0.9807	0.9827	1847.01	1846.03	2.536	15.688	14.886	0.688	0		0.9840:Asn->Asp (Asn->Asp substitution), 0.9840:Gln->Glu (Gln->Glu substitution), 0.9840:Deamidated (Deamidation)	0		FALSE	TPK3	sp|P05986|KAPC_YEAST	cAMP-dependent protein kinase type 3	sp|P06244|KAPA_YEAST
20180918_Lumos_RSLC6_Reiter_Ammerer_MFPL_onbead_Tpk1_1_1.22206.22206.2	QPHVTYYNEEQYK		2	3614.19	849.891	841.377	-17.0285	-17.0265	1680.74	1697.77	5.036e-06	24.72	15.744	1	0		-17.0265:Gln->pyro-Glu (Pyro-glu from Q), -17.0265:Ammonia-loss (Loss of ammonia)	0		TRUE	TPK1	sp|P06244|KAPA_YEAST	cAMP-dependent protein kinase type 1
20180918_Lumos_RSLC6_Reiter_Ammerer_MFPL_onbead_Tpk1_1_1.22231.22231.4	LGNLQNGTEDVKNHPWFK		4	3617.43	525.018	525.269	1.0024	1.0044	2097.05	2096.04	3.329e-12	45.348	31.613	1	0		0.9970:Label:15N(1) (15N(1))	0		TRUE	TPK1	sp|P06244|KAPA_YEAST	cAMP-dependent protein kinase type 1
20180918_Lumos_RSLC6_Reiter_Ammerer_MFPL_onbead_Tpk1_1_1.22251.22251.3	LGNLQNGTEDVKNHPWFK		3	3620.15	699.689	700.023	1.0022	1.0042	2097.05	2096.04	6.007e-11	51.593	31.555	1	0		0.9970:Label:15N(1) (15N(1))	0		TRUE	TPK1	sp|P06244|KAPA_YEAST	cAMP-dependent protein kinase type 1
20180918_Lumos_RSLC6_Reiter_Ammerer_MFPL_onbead_Tpk1_1_1.22287.22287.2	LGNLQNGTEDVKNHPWFK		2	3624.91	1049.03	1049.03	-0.0022	-0.0002	2096.04	2096.04	3.993e-14	44.331	30.386	1	0		Unknown	0		TRUE	TPK1	sp|P06244|KAPA_YEAST	cAMP-dependent protein kinase type 1
20180918_Lumos_RSLC6_Reiter_Ammerer_MFPL_onbead_Tpk1_1_1.22354.22354.2	DLKPENILLDKNGHIK		2	3634.3	924.023	924.514	0.9814	0.9834	1847.01	1846.03	0.02224	17.902	13.689	0.9921	0		0.9840:Deamidated (Deamidation), 0.9840:Asn->Asp (Asn->Asp substitution), 0.9840:Gln->Glu (Gln->Glu substitution)	0		FALSE	TPK3	sp|P05986|KAPC_YEAST	cAMP-dependent protein kinase type 3	sp|P06244|KAPA_YEAST
20180918_Lumos_RSLC6_Reiter_Ammerer_MFPL_onbead_Tpk1_1_1.22391.22391.2	QPHVTYYNEEQYK		2	3639.26	849.891	841.902	-15.9796	-15.9776	1681.79	1697.77	2.031	17.869	16.991	0.484	0		-15.9772:Cys->Ser (Cys->Ser substitution)	0		TRUE	TPK1	sp|P06244|KAPA_YEAST	cAMP-dependent protein kinase type 1
20180918_Lumos_RSLC6_Reiter_Ammerer_MFPL_onbead_Tpk1_1_1.22460.22460.4	LGNLQNGTEDVKNHPWFK		4	3648.52	525.018	525.269	1.0009	1.0029	2097.04	2096.04	1.705e-13	48.189	36.711	1	0		0.9970:Label:15N(1) (15N(1))	0		TRUE	TPK1	sp|P06244|KAPA_YEAST	cAMP-dependent protein kinase type 1
20180918_Lumos_RSLC6_Reiter_Ammerer_MFPL_onbead_Tpk1_1_1.22485.22485.4	LGNLQNGTEDVKNHPWFK		4	3651.72	525.018	525.269	1.0009	1.0029	2097.04	2096.04	6.337e-12	40.573	25.734	1	0		0.9970:Label:15N(1) (15N(1))	0		TRUE	TPK1	sp|P06244|KAPA_YEAST	cAMP-dependent protein kinase type 1
20180918_Lumos_RSLC6_Reiter_Ammerer_MFPL_onbead_Tpk1_1_1.22524.22524.2	QPHVTYYNEEQYK		2	3657.06	849.891	841.377	-17.0288	-17.0268	1680.74	1697.77	0.0001413	24.788	17.462	1	0		-17.0265:Gln->pyro-Glu (Pyro-glu from Q), -17.0265:Ammonia-loss (Loss of ammonia)	0		TRUE	TPK1	sp|P06244|KAPA_YEAST	cAMP-dependent protein kinase type 1
20180918_Lumos_RSLC6_Reiter_Ammerer_MFPL_onbead_Tpk1_1_1.22631.22631.4	DLKPENILLDKNGHIK		4	3671.36	462.515	462.761	0.9819	0.9839	1847.01	1846.03	2.24	21.504	21.277	0.851	0		0.9840:Deamidated (Deamidation), 0.9840:Asn->Asp (Asn->Asp substitution), 0.9840:Gln->Glu (Gln->Glu substitution)	0		FALSE	TPK3	sp|P05986|KAPC_YEAST	cAMP-dependent protein kinase type 3	sp|P06244|KAPA_YEAST
20180918_Lumos_RSLC6_Reiter_Ammerer_MFPL_onbead_Tpk1_1_1.22701.22701.3	LGNLQNGTEDVKNHPWFK		3	3682.25	699.689	700.356	2.0022	2.0042	2098.05	2096.04	0.000378	24.035	15.859	0.9997	0		1.9979:Glu->Met (Glu->Met substitution), 2.0042:Label:18O(1) (O18 Labeling)	0		TRUE	TPK1	sp|P06244|KAPA_YEAST	cAMP-dependent protein kinase type 1
20180918_Lumos_RSLC6_Reiter_Ammerer_MFPL_onbead_Tpk1_1_1.22752.22752.2	QPHVTYYNEEQYK		2	3689.97	849.891	841.377	-17.0282	-17.0262	1680.74	1697.77	0.0002176	24.729	17.151	1	0		-17.0265:Gln->pyro-Glu (Pyro-glu from Q), -17.0265:Ammonia-loss (Loss of ammonia)	0		TRUE	TPK1	sp|P06244|KAPA_YEAST	cAMP-dependent protein kinase type 1
20180918_Lumos_RSLC6_Reiter_Ammerer_MFPL_onbead_Tpk1_1_1.22813.22813.4	LGNLQNGTEDVKNHPWFK	LGNLQNGT[181]EDVKNHPWFK	4	3698.81	545.01	520.761	-96.9954	-96.9934	2079.01	2176.01	0.0008647	26.957	24.499	0.9999	0	8T(79.9663)	Unknown	0		FALSE	TPK1	sp|P06244|KAPA_YEAST	cAMP-dependent protein kinase type 1
20180918_Lumos_RSLC6_Reiter_Ammerer_MFPL_onbead_Tpk1_1_1.22971.22971.2	QPHVTYYNEEQYK		2	3722.24	849.891	841.378	-17.0275	-17.0255	1680.74	1697.77	5.586e-06	24.586	15.596	1	0		-17.0265:Gln->pyro-Glu (Pyro-glu from Q), -17.0265:Ammonia-loss (Loss of ammonia)	0		TRUE	TPK1	sp|P06244|KAPA_YEAST	cAMP-dependent protein kinase type 1
20180918_Lumos_RSLC6_Reiter_Ammerer_MFPL_onbead_Tpk1_1_1.23200.23200.2	QPHVTYYNEEQYK		2	3756.95	849.891	841.377	-17.0288	-17.0268	1680.74	1697.77	2.941e-06	25.035	15.798	1	0		-17.0265:Gln->pyro-Glu (Pyro-glu from Q), -17.0265:Ammonia-loss (Loss of ammonia)	0		TRUE	TPK1	sp|P06244|KAPA_YEAST	cAMP-dependent protein kinase type 1
20180918_Lumos_RSLC6_Reiter_Ammerer_MFPL_onbead_Tpk1_1_1.23674.23674.2	ITDFGFAK		2	3826.74	449.737	449.737	-0.0011	0.0009	897.459	897.46	0.01844	17.727	13.437	0.9993	0		Unknown	0		FALSE	TPK3	sp|P05986|KAPC_YEAST	cAMP-dependent protein kinase type 3	sp|P06245|KAPB_YEAST, sp|P06244|KAPA_YEAST
20180918_Lumos_RSLC6_Reiter_Ammerer_MFPL_onbead_Tpk1_1_1.23883.23883.2	ITDFGFAK		2	3857.7	449.737	449.737	-0.0009	0.0011	897.459	897.46	0.01655	17.715	13.431	0.9994	0		Unknown	0		FALSE	TPK3	sp|P05986|KAPC_YEAST	cAMP-dependent protein kinase type 3	sp|P06245|KAPB_YEAST, sp|P06244|KAPA_YEAST
20180918_Lumos_RSLC6_Reiter_Ammerer_MFPL_onbead_Tpk1_1_1.24107.24107.2	ITDFGFAK		2	3890.79	449.737	449.737	-0.0012	0.0008	897.458	897.46	0.01706	17.727	13.426	0.9994	0		Unknown	0		FALSE	TPK3	sp|P05986|KAPC_YEAST	cAMP-dependent protein kinase type 3	sp|P06244|KAPA_YEAST, sp|P06245|KAPB_YEAST
20180918_Lumos_RSLC6_Reiter_Ammerer_MFPL_onbead_Tpk1_1_1.24258.24258.4	LGNLQNGTEDVKNHPWFK		4	3913.02	525.018	525.514	1.9843	1.9863	2098.03	2096.04	0.3014	24.072	21.101	0.9835	0		1.9941:Label:15N(2) (15N(2)), 1.9793:Val->Thr (Val->Thr substitution)	0		TRUE	TPK1	sp|P06244|KAPA_YEAST	cAMP-dependent protein kinase type 1
20180918_Lumos_RSLC6_Reiter_Ammerer_MFPL_onbead_Tpk1_1_1.24313.24313.2	ITDFGFAK		2	3921.04	449.737	449.737	-0.0008	0.0012	897.459	897.46	0.02428	17.684	13.43	0.9991	0		Unknown	0		FALSE	TPK3	sp|P05986|KAPC_YEAST	cAMP-dependent protein kinase type 3	sp|P06244|KAPA_YEAST, sp|P06245|KAPB_YEAST
20180918_Lumos_RSLC6_Reiter_Ammerer_MFPL_onbead_Tpk1_1_1.24356.24356.2	LGNLQNGTEDVKNHPWFK		2	3928.28	1049.03	1049.52	0.98	0.982	2097.02	2096.04	6.013e-09	31.406	28.791	1	0		0.9840:Deamidated (Deamidation), 0.9840:Asn->Asp (Asn->Asp substitution), 0.9840:Gln->Glu (Gln->Glu substitution)	0		TRUE	TPK1	sp|P06244|KAPA_YEAST	cAMP-dependent protein kinase type 1
20180918_Lumos_RSLC6_Reiter_Ammerer_MFPL_onbead_Tpk1_1_1.24463.24463.4	LGNLQNGTEDVKNHPWFK		4	3944.7	525.018	525.514	1.9846	1.9866	2098.03	2096.04	6.509e-06	29.411	24.45	1	0		1.9941:Label:15N(2) (15N(2)), 1.9793:Val->Thr (Val->Thr substitution)	0		TRUE	TPK1	sp|P06244|KAPA_YEAST	cAMP-dependent protein kinase type 1
20180918_Lumos_RSLC6_Reiter_Ammerer_MFPL_onbead_Tpk1_1_1.24484.24484.3	LGNLQNGTEDVKNHPWFK		3	3947.95	699.689	700.016	0.9821	0.9841	2097.03	2096.04	0.0002683	30.874	29.226	1	0		0.9840:Deamidated (Deamidation), 0.9840:Asn->Asp (Asn->Asp substitution), 0.9840:Gln->Glu (Gln->Glu substitution)	0		TRUE	TPK1	sp|P06244|KAPA_YEAST	cAMP-dependent protein kinase type 1
20180918_Lumos_RSLC6_Reiter_Ammerer_MFPL_onbead_Tpk1_1_1.24525.24525.2	ITDFGFAK		2	3953.69	449.737	449.736	-0.0013	0.0007	897.458	897.46	0.02048	17.719	13.44	0.9992	0		Unknown	0		FALSE	TPK3	sp|P05986|KAPC_YEAST	cAMP-dependent protein kinase type 3	sp|P06245|KAPB_YEAST, sp|P06244|KAPA_YEAST
20180918_Lumos_RSLC6_Reiter_Ammerer_MFPL_onbead_Tpk1_1_1.24743.24743.2	ITDFGFAK		2	3986.04	449.737	449.736	-0.0014	0.0006	897.458	897.46	0.01606	17.752	13.482	0.9994	0		Unknown	0		FALSE	TPK3	sp|P05986|KAPC_YEAST	cAMP-dependent protein kinase type 3	sp|P06244|KAPA_YEAST, sp|P06245|KAPB_YEAST
20180918_Lumos_RSLC6_Reiter_Ammerer_MFPL_onbead_Tpk1_1_1.24767.24767.4	LGNLQNGTEDVKNHPWFK		4	3989.34	525.018	525.511	1.9707	1.9727	2098.01	2096.04	0.0139	25.958	25.621	0.9989	0		1.9793:Val->Thr (Val->Thr substitution)	0		TRUE	TPK1	sp|P06244|KAPA_YEAST	cAMP-dependent protein kinase type 1
20180918_Lumos_RSLC6_Reiter_Ammerer_MFPL_onbead_Tpk1_1_1.24822.24822.4	LGNLQNGTEDVKNHPWFK		4	3997.19	525.018	525.514	1.9838	1.9858	2098.03	2096.04	0.2133	23.561	20.707	0.9905	0		1.9941:Label:15N(2) (15N(2)), 1.9793:Val->Thr (Val->Thr substitution)	0		TRUE	TPK1	sp|P06244|KAPA_YEAST	cAMP-dependent protein kinase type 1
20180918_Lumos_RSLC6_Reiter_Ammerer_MFPL_onbead_Tpk1_1_1.24957.24957.2	ITDFGFAK		2	4017.19	449.737	449.737	-0.0011	0.0009	897.459	897.46	0.008471	18.084	13.748	0.9997	0		Unknown	0		FALSE	TPK3	sp|P05986|KAPC_YEAST	cAMP-dependent protein kinase type 3	sp|P06244|KAPA_YEAST, sp|P06245|KAPB_YEAST
20180918_Lumos_RSLC6_Reiter_Ammerer_MFPL_onbead_Tpk1_1_1.25068.25068.4	LGNLQNGTEDVKNHPWFK		4	4033.3	525.018	525.264	0.9833	0.9853	2097.03	2096.04	0.02857	22.438	18.097	0.9982	0		0.9840:Deamidated (Deamidation), 0.9840:Asn->Asp (Asn->Asp substitution), 0.9840:Gln->Glu (Gln->Glu substitution)	0		TRUE	TPK1	sp|P06244|KAPA_YEAST	cAMP-dependent protein kinase type 1
20180918_Lumos_RSLC6_Reiter_Ammerer_MFPL_onbead_Tpk1_1_1.25167.25167.2	ITDFGFAK		2	4048.09	449.737	449.765	0.0563	0.0583	897.516	897.46	0.009005	18.583	13.768	0.9997	0		Unknown	0		FALSE	TPK3	sp|P05986|KAPC_YEAST	cAMP-dependent protein kinase type 3	sp|P06244|KAPA_YEAST, sp|P06245|KAPB_YEAST
20180918_Lumos_RSLC6_Reiter_Ammerer_MFPL_onbead_Tpk1_1_1.25230.25230.2	ITDFGFAK		2	4058.57	449.737	449.737	-0.0012	0.0008	897.458	897.46	0.008214	18.527	13.708	0.9997	0		Unknown	0		FALSE	TPK3	sp|P05986|KAPC_YEAST	cAMP-dependent protein kinase type 3	sp|P06244|KAPA_YEAST, sp|P06245|KAPB_YEAST
20180918_Lumos_RSLC6_Reiter_Ammerer_MFPL_onbead_Tpk1_1_1.25254.25254.3	LGNLQNGTEDVKNHPWFK		3	4062.41	699.689	700.35	1.9843	1.9863	2098.03	2096.04	0.0004981	29.63	29.423	0.9996	0		1.9793:Val->Thr (Val->Thr substitution), 1.9941:Label:15N(2) (15N(2))	0		TRUE	TPK1	sp|P06244|KAPA_YEAST	cAMP-dependent protein kinase type 1
20180918_Lumos_RSLC6_Reiter_Ammerer_MFPL_onbead_Tpk1_1_1.25271.25271.4	LGNLQNGTEDVKNHPWFK		4	4064.79	525.018	525.514	1.9843	1.9863	2098.03	2096.04	4.598e-08	36.014	30.72	1	0		1.9793:Val->Thr (Val->Thr substitution), 1.9941:Label:15N(2) (15N(2))	0		TRUE	TPK1	sp|P06244|KAPA_YEAST	cAMP-dependent protein kinase type 1
20180918_Lumos_RSLC6_Reiter_Ammerer_MFPL_onbead_Tpk1_1_1.25289.25289.3	QPHVTYYNEEQYKQFIAQAR		3	4067.49	838.412	838.744	0.997	0.999	2513.21	2512.21	1e-15	48.405	36.673	1	0		0.9970:Label:15N(1) (15N(1))	0		TRUE	TPK1	sp|P06244|KAPA_YEAST	cAMP-dependent protein kinase type 1
20180918_Lumos_RSLC6_Reiter_Ammerer_MFPL_onbead_Tpk1_1_1.25453.25453.2	ITDFGFAK		2	4091.59	449.737	449.736	-0.0014	0.0006	897.458	897.46	0.08339	16.546	13.441	0.9985	0		Unknown	0		FALSE	TPK3	sp|P05986|KAPC_YEAST	cAMP-dependent protein kinase type 3	sp|P06245|KAPB_YEAST, sp|P06244|KAPA_YEAST
20180918_Lumos_RSLC6_Reiter_Ammerer_MFPL_onbead_Tpk1_1_1.25504.25504.4	LGNLQNGTEDVKNHPWFK		4	4099.22	525.018	525.514	1.9824	1.9844	2098.03	2096.04	0.07274	26.848	22.959	0.9956	0		1.9793:Val->Thr (Val->Thr substitution), 1.9941:Label:15N(2) (15N(2))	0		TRUE	TPK1	sp|P06244|KAPA_YEAST	cAMP-dependent protein kinase type 1
20180918_Lumos_RSLC6_Reiter_Ammerer_MFPL_onbead_Tpk1_1_1.25518.25518.3	QPHVTYYNEEQYKQFIAQAR		3	4101.33	838.412	839.079	2.0024	2.0044	2514.22	2512.21	2.389e-08	37.118	25.793	1	0		1.9979:Glu->Met (Glu->Met substitution), 2.0042:Label:18O(1) (O18 Labeling)	0		TRUE	TPK1	sp|P06244|KAPA_YEAST	cAMP-dependent protein kinase type 1
20180918_Lumos_RSLC6_Reiter_Ammerer_MFPL_onbead_Tpk1_1_1.25706.25706.2	ITDFGFAK		2	4129.6	449.737	449.737	-0.0008	0.0012	897.459	897.46	0.02643	18.396	14.124	0.9991	0		Unknown	0		FALSE	TPK3	sp|P05986|KAPC_YEAST	cAMP-dependent protein kinase type 3	sp|P06244|KAPA_YEAST, sp|P06245|KAPB_YEAST
20180918_Lumos_RSLC6_Reiter_Ammerer_MFPL_onbead_Tpk1_1_1.25785.25785.2	ITDFGFAK		2	4141.24	449.737	449.21	-1.0545	-1.0525	896.405	897.46	0.07594	17.998	15.542	0.9503	0		Unknown	0		FALSE	TPK3	sp|P05986|KAPC_YEAST	cAMP-dependent protein kinase type 3	sp|P06244|KAPA_YEAST, sp|P06245|KAPB_YEAST
20180918_Lumos_RSLC6_Reiter_Ammerer_MFPL_onbead_Tpk1_1_1.26004.26004.2	ITDFGFAK		2	4174.34	449.737	449.21	-1.0547	-1.0527	896.405	897.46	0.128	15.561	15.441	0.9407	0		Unknown	0		FALSE	TPK3	sp|P05986|KAPC_YEAST	cAMP-dependent protein kinase type 3	sp|P06244|KAPA_YEAST, sp|P06245|KAPB_YEAST
20180918_Lumos_RSLC6_Reiter_Ammerer_MFPL_onbead_Tpk1_1_1.26653.26653.2	ITDFGFAK		2	4271.76	449.737	449.737	-0.0012	0.0008	897.458	897.46	0.06399	16.472	13.637	0.9986	0		Unknown	0		FALSE	TPK3	sp|P05986|KAPC_YEAST	cAMP-dependent protein kinase type 3	sp|P06244|KAPA_YEAST, sp|P06245|KAPB_YEAST
20180918_Lumos_RSLC6_Reiter_Ammerer_MFPL_onbead_Tpk1_1_1.26959.26959.3	DLKPENILLDK		3	4317.92	433.25	433.25	-0.0015	0.0005	1296.73	1296.73	8.528e-06	36.996	25.212	1	0		Unknown	0		FALSE	TPK3	sp|P05986|KAPC_YEAST	cAMP-dependent protein kinase type 3	sp|P38147|CHK1_YEAST, sp|Q03407|PKH1_YEAST, sp|P06244|KAPA_YEAST, sp|P34244|HSL1_YEAST
20180918_Lumos_RSLC6_Reiter_Ammerer_MFPL_onbead_Tpk1_1_1.26968.26968.2	DLKPENILLDK		2	4319.12	649.372	649.37	-0.0023	-0.0003	1296.73	1296.73	7.428e-06	29.298	15.598	1	0		Unknown	0		FALSE	TPK3	sp|P05986|KAPC_YEAST	cAMP-dependent protein kinase type 3	sp|P06244|KAPA_YEAST, sp|P34244|HSL1_YEAST, sp|P38147|CHK1_YEAST, sp|Q03407|PKH1_YEAST
20180918_Lumos_RSLC6_Reiter_Ammerer_MFPL_onbead_Tpk1_1_1.27024.27024.2	DLKPENILLDK		2	4327.54	649.372	535.316	-228.112	-228.11	1068.62	1296.73	0.005131	18.005	12.952	0.9747	0		Unknown	0		FALSE	TPK3	sp|P05986|KAPC_YEAST	cAMP-dependent protein kinase type 3	sp|P06244|KAPA_YEAST, sp|P34244|HSL1_YEAST, sp|P38147|CHK1_YEAST, sp|Q03407|PKH1_YEAST
20180918_Lumos_RSLC6_Reiter_Ammerer_MFPL_onbead_Tpk1_1_1.27168.27168.3	DLKPENILLDK		3	4349.31	433.25	433.25	-0.0014	0.0006	1296.73	1296.73	7.061e-06	36.955	22.29	1	0		Unknown	0		FALSE	TPK3	sp|P05986|KAPC_YEAST	cAMP-dependent protein kinase type 3	sp|P06244|KAPA_YEAST, sp|P34244|HSL1_YEAST, sp|P38147|CHK1_YEAST, sp|Q03407|PKH1_YEAST
20180918_Lumos_RSLC6_Reiter_Ammerer_MFPL_onbead_Tpk1_1_1.27251.27251.2	DLKPENILLDK		2	4361.04	649.372	649.371	-0.0016	0.0004	1296.73	1296.73	2.316e-06	29.245	24.22	1	0		Unknown	0		FALSE	TPK3	sp|P05986|KAPC_YEAST	cAMP-dependent protein kinase type 3	sp|P06244|KAPA_YEAST, sp|P34244|HSL1_YEAST, sp|P38147|CHK1_YEAST, sp|Q03407|PKH1_YEAST
20180918_Lumos_RSLC6_Reiter_Ammerer_MFPL_onbead_Tpk1_1_1.27293.27293.2	ITDFGFAK		2	4366.9	449.737	449.737	-0.0002	0.0018	897.459	897.46	0.007502	15.982	11.999	0.9997	0		Unknown	0		FALSE	TPK3	sp|P05986|KAPC_YEAST	cAMP-dependent protein kinase type 3	sp|P06244|KAPA_YEAST, sp|P06245|KAPB_YEAST
20180918_Lumos_RSLC6_Reiter_Ammerer_MFPL_onbead_Tpk1_1_1.27380.27380.3	DLKPENILLDK		3	4380.03	433.25	433.25	-0.0017	0.0003	1296.73	1296.73	3.111e-05	36.903	36.903	1	0		Unknown	0		FALSE	TPK3	sp|P05986|KAPC_YEAST	cAMP-dependent protein kinase type 3	sp|P38147|CHK1_YEAST, sp|Q03407|PKH1_YEAST, sp|P06244|KAPA_YEAST, sp|P34244|HSL1_YEAST
20180918_Lumos_RSLC6_Reiter_Ammerer_MFPL_onbead_Tpk1_1_1.27514.27514.2	ITDFGFAK		2	4399.7	449.737	449.737	-0.0011	0.0009	897.458	897.46	0.02354	17.259	13.051	0.9991	0		Unknown	0		FALSE	TPK3	sp|P05986|KAPC_YEAST	cAMP-dependent protein kinase type 3	sp|P06244|KAPA_YEAST, sp|P06245|KAPB_YEAST
20180918_Lumos_RSLC6_Reiter_Ammerer_MFPL_onbead_Tpk1_1_1.27651.27651.2	ITDFGFAK		2	4419.73	449.737	449.245	-0.9852	-0.9832	896.475	897.46	1.426	15.179	13.626	0.4596	0		-0.9790:Glu->pyro-Glu+Methyl:2H(2)13C(1) (Pyro-Glu from E + Methylation Medium), -0.9840:Amidated (Amidation), -0.9840:Asp->Asn (Asp->Asn substitution), -0.9840:Glu->Gln (Glu->Gln substitution)	0		FALSE	TPK3	sp|P05986|KAPC_YEAST	cAMP-dependent protein kinase type 3	sp|P06244|KAPA_YEAST, sp|P06245|KAPB_YEAST
20180918_Lumos_RSLC6_Reiter_Ammerer_MFPL_onbead_Tpk1_1_1.27759.27759.3	DLKPENILLDK		3	4435.74	433.25	433.902	1.9567	1.9587	1298.69	1296.73	0.0004983	32.884	32.884	0.9999	0		1.9615:Thr->Cys (Thr->Cys substitution)	0		FALSE	TPK3	sp|P05986|KAPC_YEAST	cAMP-dependent protein kinase type 3	sp|P38147|CHK1_YEAST, sp|Q03407|PKH1_YEAST, sp|P06244|KAPA_YEAST, sp|P34244|HSL1_YEAST
20180918_Lumos_RSLC6_Reiter_Ammerer_MFPL_onbead_Tpk1_1_1.28001.28001.2	ITDFGFAK		2	4472.44	449.737	449.273	-0.9278	-0.9258	896.532	897.46	2.821	14.637	14.111	0.359	0		Unknown	0		FALSE	TPK3	sp|P05986|KAPC_YEAST	cAMP-dependent protein kinase type 3	sp|P06244|KAPA_YEAST, sp|P06245|KAPB_YEAST
20180918_Lumos_RSLC6_Reiter_Ammerer_MFPL_onbead_Tpk1_1_1.28221.28221.3	QPHVTYYNEEQYKQFIAQAR	QPHVT[181]YYNEEQYKQFIAQAR	3	4504.69	865.067	718.022	-441.135	-441.133	2151.04	2592.18	5.693e-10	40.335	39.74	1	0	5T(79.9663)	Unknown	0		FALSE	TPK1	sp|P06244|KAPA_YEAST	cAMP-dependent protein kinase type 1
20180918_Lumos_RSLC6_Reiter_Ammerer_MFPL_onbead_Tpk1_1_1.28302.28302.3	DLKPENILLDK		3	4516.53	433.25	452.257	57.02	57.022	1353.75	1296.73	0.01114	24.337	18.058	0.9734	0		57.0215:Carbamidomethyl (Iodoacetamide derivative), 57.0215:Ala->Gln (Ala->Gln substitution), 57.0215:Gly->Asn (Gly->Asn substitution), 57.0215:Gly (Addition of Glycine)	0		FALSE	TPK3	sp|P05986|KAPC_YEAST	cAMP-dependent protein kinase type 3	sp|Q03407|PKH1_YEAST, sp|P06244|KAPA_YEAST, sp|P34244|HSL1_YEAST, sp|P38147|CHK1_YEAST
20180918_Lumos_RSLC6_Reiter_Ammerer_MFPL_onbead_Tpk1_1_1.28312.28312.2	DLKPENILLDK		2	4518.06	649.372	677.881	57.0195	57.0215	1353.75	1296.73	0.005279	19.188	13.04	0.9925	0		57.0215:Ala->Gln (Ala->Gln substitution), 57.0215:Gly->Asn (Gly->Asn substitution), 57.0215:Gly (Addition of Glycine), 57.0215:Carbamidomethyl (Iodoacetamide derivative)	0		FALSE	TPK3	sp|P05986|KAPC_YEAST	cAMP-dependent protein kinase type 3	sp|Q03407|PKH1_YEAST, sp|P06244|KAPA_YEAST, sp|P34244|HSL1_YEAST, sp|P38147|CHK1_YEAST
20180918_Lumos_RSLC6_Reiter_Ammerer_MFPL_onbead_Tpk1_1_1.28329.28329.3	DLKPENILLDK		3	4520.51	433.25	433.25	-0.001	0.001	1296.73	1296.73	0.1091	23.077	23.077	0.9969	0		Unknown	0		FALSE	TPK3	sp|P05986|KAPC_YEAST	cAMP-dependent protein kinase type 3	sp|P06244|KAPA_YEAST, sp|P34244|HSL1_YEAST, sp|P38147|CHK1_YEAST, sp|Q03407|PKH1_YEAST
20180918_Lumos_RSLC6_Reiter_Ammerer_MFPL_onbead_Tpk1_1_1.28390.28390.2	DLKPENILLDK		2	4528.98	649.372	678.383	58.0233	58.0253	1354.75	1296.73	0.01199	17.317	12.456	0.9777	0		58.0293:Carbofuran (2,3-dihydro-2,2-dimethyl-7-benzofuranol N-methyl carbamate), 58.0207:Gln->Trp (Gln->Trp substitution)	0		FALSE	TPK3	sp|P05986|KAPC_YEAST	cAMP-dependent protein kinase type 3	sp|P34244|HSL1_YEAST, sp|P38147|CHK1_YEAST, sp|Q03407|PKH1_YEAST, sp|P06244|KAPA_YEAST
20180918_Lumos_RSLC6_Reiter_Ammerer_MFPL_onbead_Tpk1_1_1.28441.28441.3	DLKPENILLDK		3	4536.79	433.25	433.903	1.9571	1.9591	1298.69	1296.73	0.2062	20.049	17.562	0.9835	0		1.9615:Thr->Cys (Thr->Cys substitution)	0		FALSE	TPK3	sp|P05986|KAPC_YEAST	cAMP-dependent protein kinase type 3	sp|P06244|KAPA_YEAST, sp|P34244|HSL1_YEAST, sp|P38147|CHK1_YEAST, sp|Q03407|PKH1_YEAST
20180918_Lumos_RSLC6_Reiter_Ammerer_MFPL_onbead_Tpk1_1_1.28540.28540.3	DLKPENILLDK		3	4552.29	433.25	433.25	-0.0013	0.0007	1296.73	1296.73	0.1436	23.497	20.772	0.9964	0		Unknown	0		FALSE	TPK3	sp|P05986|KAPC_YEAST	cAMP-dependent protein kinase type 3	sp|P06244|KAPA_YEAST, sp|P34244|HSL1_YEAST, sp|P38147|CHK1_YEAST, sp|Q03407|PKH1_YEAST
20180918_Lumos_RSLC6_Reiter_Ammerer_MFPL_onbead_Tpk1_1_1.28673.28673.2	ITDFGFAK		2	4571.56	449.737	449.737	-0.0011	0.0009	897.458	897.46	0.0295	16.989	13.629	0.999	0		Unknown	0		FALSE	TPK3	sp|P05986|KAPC_YEAST	cAMP-dependent protein kinase type 3	sp|P06244|KAPA_YEAST, sp|P06245|KAPB_YEAST
20180918_Lumos_RSLC6_Reiter_Ammerer_MFPL_onbead_Tpk1_1_1.28809.28809.3	DLKPENILLDK		3	4592.24	433.25	433.25	-0.0017	0.0003	1296.73	1296.73	0.06429	23.342	23.285	0.9979	0		Unknown	0		FALSE	TPK3	sp|P05986|KAPC_YEAST	cAMP-dependent protein kinase type 3	sp|P38147|CHK1_YEAST, sp|Q03407|PKH1_YEAST, sp|P06244|KAPA_YEAST, sp|P34244|HSL1_YEAST
20180918_Lumos_RSLC6_Reiter_Ammerer_MFPL_onbead_Tpk1_1_1.28998.28998.2	ITDFGFAK		2	4619.7	449.737	450.238	1.0021	1.0041	898.462	897.46	0.03342	17.013	13.923	0.9987	0		0.9970:Label:15N(1) (15N(1))	0		FALSE	TPK3	sp|P05986|KAPC_YEAST	cAMP-dependent protein kinase type 3	sp|P06244|KAPA_YEAST, sp|P06245|KAPB_YEAST
20180918_Lumos_RSLC6_Reiter_Ammerer_MFPL_onbead_Tpk1_1_1.29054.29054.3	NIETPYEPPIQQGQGDTSQFDK	NIETPY[243]EPPIQQGQGDTSQFDK	3	4627.66	858.046	832.059	-77.9607	-77.9587	2493.16	2571.12	1.098e-10	43.949	43.739	1	0	6Y(79.9663)	Unknown	0		FALSE	TPK1	sp|P06244|KAPA_YEAST	cAMP-dependent protein kinase type 1
20180918_Lumos_RSLC6_Reiter_Ammerer_MFPL_onbead_Tpk1_1_1.29077.29077.2	NIETPYEPPIQQGQGDTSQFDK		2	4631.1	1246.58	1247.08	0.9992	1.0012	2492.15	2491.15	5.035e-12	39.356	36.204	1	0		0.9970:Label:15N(1) (15N(1))	0		TRUE	TPK1	sp|P06244|KAPA_YEAST	cAMP-dependent protein kinase type 1
20180918_Lumos_RSLC6_Reiter_Ammerer_MFPL_onbead_Tpk1_1_1.29137.29137.3	DLKPENILLDK		3	4640.06	433.25	433.902	1.956	1.958	1298.68	1296.73	0.1106	22.128	18.512	0.9889	0		1.9615:Thr->Cys (Thr->Cys substitution)	0		FALSE	TPK3	sp|P05986|KAPC_YEAST	cAMP-dependent protein kinase type 3	sp|P06244|KAPA_YEAST, sp|P34244|HSL1_YEAST, sp|P38147|CHK1_YEAST, sp|Q03407|PKH1_YEAST
20180918_Lumos_RSLC6_Reiter_Ammerer_MFPL_onbead_Tpk1_1_1.29285.29285.3	NIETPYEPPIQQGQGDTSQFDK		3	4661.07	831.391	832.061	2.0114	2.0134	2493.16	2491.15	1.859e-14	52.392	51.047	1	0		2.0042:Label:18O(1) (O18 Labeling), 2.0156:Pro->Val (Pro->Val substitution)	0		TRUE	TPK1	sp|P06244|KAPA_YEAST	cAMP-dependent protein kinase type 1
20180918_Lumos_RSLC6_Reiter_Ammerer_MFPL_onbead_Tpk1_1_1.29296.29296.2	ITDFGFAK		2	4662.78	449.737	449.737	-0.0009	0.0011	897.459	897.46	0.005501	17.073	13.172	0.9998	0		Unknown	0		FALSE	TPK3	sp|P05986|KAPC_YEAST	cAMP-dependent protein kinase type 3	sp|P06245|KAPB_YEAST, sp|P06244|KAPA_YEAST
20180918_Lumos_RSLC6_Reiter_Ammerer_MFPL_onbead_Tpk1_1_1.29300.29300.3	NIETPYEPPIQQGQGDTSQFDK	NIETPY[243]EPPIQQGQGDTSQFDK	3	4663.4	858.046	831.724	-78.9656	-78.9636	2492.15	2571.12	1.399e-13	52.602	52.353	1	0	6Y(79.9663)	Unknown	0		FALSE	TPK1	sp|P06244|KAPA_YEAST	cAMP-dependent protein kinase type 1
20180918_Lumos_RSLC6_Reiter_Ammerer_MFPL_onbead_Tpk1_1_1.29317.29317.3	NIETPYEPPIQQGQGDTSQFDK	NIETPY[243]EPPIQQGQGDTSQFDK	3	4665.9	858.046	832.06	-77.9578	-77.9558	2493.16	2571.12	1.465e-12	49.787	49.579	1	0	6Y(79.9663)	Unknown	0		FALSE	TPK1	sp|P06244|KAPA_YEAST	cAMP-dependent protein kinase type 1
20180918_Lumos_RSLC6_Reiter_Ammerer_MFPL_onbead_Tpk1_1_1.29329.29329.3	NIETPYEPPIQQGQGDTSQFDK	NIETPY[243]EPPIQQGQGDTSQFDK	3	4667.5	858.046	831.724	-78.9668	-78.9648	2492.15	2571.12	8.181e-11	46.664	46.447	1	0	6Y(79.9663)	Unknown	0		FALSE	TPK1	sp|P06244|KAPA_YEAST	cAMP-dependent protein kinase type 1
20180918_Lumos_RSLC6_Reiter_Ammerer_MFPL_onbead_Tpk1_1_1.29460.29460.2	TYEKILNAELR		2	4686.57	675.375	697.379	44.0077	44.0097	1392.74	1348.73	3.299e-05	24.382	18.569	1	0		44.0085:Ser->Met (Ser->Met substitution), 44.0173:Acetyl:13C(2) (heavy acetylation), 44.0085:Delta:H(4)C(2)O(-1)S(1) (S-Ethylcystine from Serine)	0		TRUE	TPK1	sp|P06244|KAPA_YEAST	cAMP-dependent protein kinase type 1
20180918_Lumos_RSLC6_Reiter_Ammerer_MFPL_onbead_Tpk1_1_1.29575.29575.3	DLKPENILLDK		3	4702.99	433.25	433.25	-0.0011	0.0009	1296.73	1296.73	3.073	21.235	20.937	0.9434	0		Unknown	0		FALSE	TPK3	sp|P05986|KAPC_YEAST	cAMP-dependent protein kinase type 3	sp|P06244|KAPA_YEAST, sp|P34244|HSL1_YEAST, sp|P38147|CHK1_YEAST, sp|Q03407|PKH1_YEAST
20180918_Lumos_RSLC6_Reiter_Ammerer_MFPL_onbead_Tpk1_1_1.29622.29622.2	ITDFGFAK		2	4709.86	449.737	449.737	-0.0009	0.0011	897.459	897.46	0.0241	17.109	13.212	0.9991	0		Unknown	0		FALSE	TPK3	sp|P05986|KAPC_YEAST	cAMP-dependent protein kinase type 3	sp|P06244|KAPA_YEAST, sp|P06245|KAPB_YEAST
20180918_Lumos_RSLC6_Reiter_Ammerer_MFPL_onbead_Tpk1_1_1.30108.30108.2	ITDFGFAK		2	4782.61	449.737	449.736	-0.0017	0.0003	897.458	897.46	0.01734	17.299	14.416	0.9993	0		Unknown	0		FALSE	TPK3	sp|P05986|KAPC_YEAST	cAMP-dependent protein kinase type 3	sp|P06244|KAPA_YEAST, sp|P06245|KAPB_YEAST
20180918_Lumos_RSLC6_Reiter_Ammerer_MFPL_onbead_Tpk1_1_1.30133.30133.2	YSLQDFQILR		2	4786.35	641.843	604.806	-74.0744	-74.0724	1207.6	1281.67	0.1427	17.131	14.82	0.4125	0		Unknown	0		TRUE	TPK1	sp|P06244|KAPA_YEAST	cAMP-dependent protein kinase type 1
20180918_Lumos_RSLC6_Reiter_Ammerer_MFPL_onbead_Tpk1_1_1.30176.30176.3	VTSGKYSLQDFQILR		3	4792.64	585.653	604.659	57.0196	57.0216	1810.96	1753.94	0.00026	28.411	27.564	0.9968	0		57.0215:Gly->Asn (Gly->Asn substitution), 57.0215:Gly (Addition of Glycine), 57.0215:Carbamidomethyl (Iodoacetamide derivative), 57.0215:Ala->Gln (Ala->Gln substitution)	0		TRUE	TPK1	sp|P06244|KAPA_YEAST	cAMP-dependent protein kinase type 1
20180918_Lumos_RSLC6_Reiter_Ammerer_MFPL_onbead_Tpk1_1_1.30235.30235.3	VTSGKYSLQDFQILR		3	4801.56	585.653	585.652	-0.0025	-0.0005	1753.93	1753.94	0.0002125	41	30.108	1	0		Unknown	0		TRUE	TPK1	sp|P06244|KAPA_YEAST	cAMP-dependent protein kinase type 1
20180918_Lumos_RSLC6_Reiter_Ammerer_MFPL_onbead_Tpk1_1_1.30296.30296.2	VTSGKYSLQDFQILR		2	4811.43	877.976	877.975	-0.001	0.001	1753.94	1753.94	1.774e-10	40.933	28.419	1	0		Unknown	0		TRUE	TPK1	sp|P06244|KAPA_YEAST	cAMP-dependent protein kinase type 1
20180918_Lumos_RSLC6_Reiter_Ammerer_MFPL_onbead_Tpk1_1_1.30438.30438.2	ITDFGFAK		2	4832.3	449.737	449.737	-0.0009	0.0011	897.459	897.46	0.01641	17.106	13.223	0.9994	0		Unknown	0		FALSE	TPK3	sp|P05986|KAPC_YEAST	cAMP-dependent protein kinase type 3	sp|P06244|KAPA_YEAST, sp|P06245|KAPB_YEAST
20180918_Lumos_RSLC6_Reiter_Ammerer_MFPL_onbead_Tpk1_1_1.30693.30693.2	ITDFGFAK		2	4869.46	449.737	449.736	-0.0016	0.0004	897.458	897.46	0.09843	17.217	15.454	0.9984	0		Unknown	0		FALSE	TPK3	sp|P05986|KAPC_YEAST	cAMP-dependent protein kinase type 3	sp|P06244|KAPA_YEAST, sp|P06245|KAPB_YEAST
20180918_Lumos_RSLC6_Reiter_Ammerer_MFPL_onbead_Tpk1_1_1.30828.30828.3	QPHVTYYNEEQYKQFIAQAR		3	4889.79	838.412	853.08	44.0039	44.0059	2556.22	2512.21	2.948e-06	36.151	31.518	0.9997	0		44.0085:Delta:H(4)C(2)O(-1)S(1) (S-Ethylcystine from Serine), 44.0085:Ser->Met (Ser->Met substitution)	0		TRUE	TPK1	sp|P06244|KAPA_YEAST	cAMP-dependent protein kinase type 1
20180918_Lumos_RSLC6_Reiter_Ammerer_MFPL_onbead_Tpk1_1_1.30863.30863.3	QPHVTYYNEEQYKQFIAQAR		3	4894.79	838.412	853.08	44.0048	44.0068	2556.22	2512.21	5.86e-09	40.704	33.685	1	0		44.0085:Delta:H(4)C(2)O(-1)S(1) (S-Ethylcystine from Serine), 44.0085:Ser->Met (Ser->Met substitution)	0		TRUE	TPK1	sp|P06244|KAPA_YEAST	cAMP-dependent protein kinase type 1
20180918_Lumos_RSLC6_Reiter_Ammerer_MFPL_onbead_Tpk1_1_1.30891.30891.3	QPHVTYYNEEQYKQFIAQAR		3	4899.05	838.412	833.403	-15.0249	-15.0229	2497.19	2512.21	1.009e-13	44.357	35.727	1	0		Unknown	0		TRUE	TPK1	sp|P06244|KAPA_YEAST	cAMP-dependent protein kinase type 1
20180918_Lumos_RSLC6_Reiter_Ammerer_MFPL_onbead_Tpk1_1_1.32098.32098.2	ITDFGFAK		2	5077.56	449.737	449.736	-0.0014	0.0006	897.458	897.46	0.02429	17.252	13.125	0.9991	0		Unknown	0		FALSE	TPK3	sp|P05986|KAPC_YEAST	cAMP-dependent protein kinase type 3	sp|P06245|KAPB_YEAST, sp|P06244|KAPA_YEAST
20180918_Lumos_RSLC6_Reiter_Ammerer_MFPL_onbead_Tpk1_1_2.50638.50638.4	ITDFGFAKYVPDVTYTLCGTPDYIAPEVVSTKPYNK	IT[181]DFGFAKY[243]VPDVT[181]YTLC[160]GTPDYIAPEVVSTKPYNK	4	7084.53	1078.23	1203.02	499.132	499.134	4808.04	4308.91	0.0001062	27.772	27.772	1	0	2T(79.9663), 9Y(79.9663), 14T(79.9663), 18C(57.0215)	Unknown	0		FALSE	TPK3	sp|P05986|KAPC_YEAST	cAMP-dependent protein kinase type 3	sp|P06244|KAPA_YEAST
20180918_Lumos_RSLC6_Reiter_Ammerer_MFPL_onbead_Tpk1_1_1.32273.32273.2	QPHVTYYNEEQYK		2	5103.93	849.891	850.393	1.0022	1.0042	1698.77	1697.77	2.261e-07	26.522	17.777	1	0		0.9970:Label:15N(1) (15N(1))	0		TRUE	TPK1	sp|P06244|KAPA_YEAST	cAMP-dependent protein kinase type 1
20180918_Lumos_RSLC6_Reiter_Ammerer_MFPL_onbead_Tpk1_1_1.32362.32362.2	ITDFGFAK		2	5117.01	449.737	449.736	-0.0015	0.0005	897.458	897.46	0.03077	16.964	13.141	0.999	0		Unknown	0		FALSE	TPK3	sp|P05986|KAPC_YEAST	cAMP-dependent protein kinase type 3	sp|P06245|KAPB_YEAST, sp|P06244|KAPA_YEAST
20180918_Lumos_RSLC6_Reiter_Ammerer_MFPL_onbead_Tpk1_1_1.32618.32618.2	ITDFGFAK		2	5155.29	449.737	449.736	-0.0017	0.0003	897.458	897.46	0.009828	18.197	14.255	0.9997	0		Unknown	0		FALSE	TPK3	sp|P05986|KAPC_YEAST	cAMP-dependent protein kinase type 3	sp|P06244|KAPA_YEAST, sp|P06245|KAPB_YEAST
20180918_Lumos_RSLC6_Reiter_Ammerer_MFPL_onbead_Tpk1_1_1.32810.32810.4	LGNLQNGTEDVKNHPWFK		4	5183.39	525.018	565.794	163.105	163.107	2259.15	2096.04	4.734e-06	30.832	17.356	1	0		Unknown	0		TRUE	TPK1	sp|P06244|KAPA_YEAST	cAMP-dependent protein kinase type 1
20180918_Lumos_RSLC6_Reiter_Ammerer_MFPL_onbead_Tpk1_1_1.33062.33062.3	NGHIKITDFGFAK		3	5220.11	483.261	497.924	43.9881	43.9901	1490.75	1446.76	0.1178	20.598	17.773	0.6324	0		43.9898:Carboxy (Carboxylation), 43.9898:Ala->Asp (Ala->Asp substitution)	0		FALSE	TPK3	sp|P05986|KAPC_YEAST	cAMP-dependent protein kinase type 3	sp|P06244|KAPA_YEAST, sp|P06245|KAPB_YEAST
20180918_Lumos_RSLC6_Reiter_Ammerer_MFPL_onbead_Tpk1_2_2.39171.39171.4	ITDFGFAKYVPDVTYTLCGTPDYIAPEVVSTKPYNK	IT[181]DFGFAKYVPDVTYTLCGT[181]PDY[243]IAPEVVSTKPYNK	4	6055.85	1063.98	1186.8	491.284	491.286	4743.17	4251.88	1.133e-05	28.511	28.492	1	0	2T(79.9663), 20T(79.9663), 23Y(79.9663)	Unknown	0		FALSE	TPK3	sp|P05986|KAPC_YEAST	cAMP-dependent protein kinase type 3	sp|P06244|KAPA_YEAST
20180918_Lumos_RSLC6_Reiter_Ammerer_MFPL_onbead_Tpk1_1_2.41402.41402.4	YVPDVTYTLCGTPDYIAPEVVSTKPYNK	YVPDVT[181]YTLCGTPDYIAPEVVSTKPYNK	4	5897.63	804.133	926.91	491.108	491.11	3703.61	3212.5	4.588e-05	28.732	28.732	1	0	6T(79.9663)	Unknown	0		FALSE	TPK3	sp|P05986|KAPC_YEAST	cAMP-dependent protein kinase type 3	sp|P06244|KAPA_YEAST
20180918_Lumos_RSLC6_Reiter_Ammerer_MFPL_onbead_Tpk1_1_1.33314.33314.2	ITDFGFAK		2	5258.07	449.737	449.748	0.0209	0.0229	897.481	897.46	0.1079	16.051	13.749	0.9984	0		Unknown	0		FALSE	TPK3	sp|P05986|KAPC_YEAST	cAMP-dependent protein kinase type 3	sp|P06244|KAPA_YEAST, sp|P06245|KAPB_YEAST
20180918_Lumos_RSLC6_Reiter_Ammerer_MFPL_onbead_Tpk1_1_1.33475.33475.3	VTSGKYSLQDFQILR		3	5282.1	585.653	646.998	184.036	184.038	1937.97	1753.94	0.2813	24.883	22.462	0.4	0		Unknown	0		TRUE	TPK1	sp|P06244|KAPA_YEAST	cAMP-dependent protein kinase type 1
20180918_Lumos_RSLC6_Reiter_Ammerer_MFPL_onbead_Tpk1_1_1.33532.33532.2	FPPFFNEDVK		2	5290.04	620.306	620.305	-0.0016	0.0004	1238.6	1238.6	1.495e-07	24.192	11.322	1	0		Unknown	0		TRUE	TPK1	sp|P06244|KAPA_YEAST	cAMP-dependent protein kinase type 1
20180918_Lumos_RSLC6_Reiter_Ammerer_MFPL_onbead_Tpk1_1_1.33656.33656.3	YPEEDINYGVQGEDPYADLFR		3	5308.57	830.708	705.656	-375.157	-375.155	2113.94	2489.1	0.009424	22.679	20.68	0.73	0		Unknown	0		TRUE	TPK1	sp|P06244|KAPA_YEAST	cAMP-dependent protein kinase type 1
20180918_Lumos_RSLC6_Reiter_Ammerer_MFPL_onbead_Tpk1_1_1.33744.33744.2	FPPFFNEDVK		2	5321.45	620.306	620.305	-0.0015	0.0005	1238.6	1238.6	1.353e-07	24.24	11.363	1	0		Unknown	0		TRUE	TPK1	sp|P06244|KAPA_YEAST	cAMP-dependent protein kinase type 1
20180918_Lumos_RSLC6_Reiter_Ammerer_MFPL_onbead_Tpk1_1_1.33897.33897.2	FPPFFNEDVK		2	5344.18	620.306	498.247	-244.119	-244.117	994.478	1238.6	0.01138	18.127	13.955	0.9267	0		Unknown	0		TRUE	TPK1	sp|P06244|KAPA_YEAST	cAMP-dependent protein kinase type 1
20180918_Lumos_RSLC6_Reiter_Ammerer_MFPL_onbead_Tpk1_1_1.33938.33938.2	ILNAELRFPPFFNEDVK		2	5350.4	1025.04	995.568	-58.9521	-58.9501	1989.12	2048.07	0.0001336	18.831	9.801	0.9998	0		Unknown	0		FALSE	TPK1	sp|P06244|KAPA_YEAST	cAMP-dependent protein kinase type 1
20180918_Lumos_RSLC6_Reiter_Ammerer_MFPL_onbead_Tpk1_1_1.33961.33961.2	FPPFFNEDVK		2	5353.87	620.306	620.305	-0.0017	0.0003	1238.6	1238.6	1.554e-07	24.197	11.342	1	0		Unknown	0		TRUE	TPK1	sp|P06244|KAPA_YEAST	cAMP-dependent protein kinase type 1
20180918_Lumos_RSLC6_Reiter_Ammerer_MFPL_onbead_Tpk1_1_1.34044.34044.2	FPPFFNEDVK		2	5366.05	620.306	546.772	-147.068	-147.066	1091.53	1238.6	0.0001996	20.627	13.018	0.9995	0		Unknown	0		TRUE	TPK1	sp|P06244|KAPA_YEAST	cAMP-dependent protein kinase type 1
20180918_Lumos_RSLC6_Reiter_Ammerer_MFPL_onbead_Tpk1_1_1.34164.34164.2	FPPFFNEDVK		2	5384.09	620.306	620.305	-0.0016	0.0004	1238.6	1238.6	1.638e-07	24.226	11.337	1	0		Unknown	0		TRUE	TPK1	sp|P06244|KAPA_YEAST	cAMP-dependent protein kinase type 1
20180918_Lumos_RSLC6_Reiter_Ammerer_MFPL_onbead_Tpk1_1_1.34344.34344.2	ITDFGFAK		2	5410.6	449.737	449.736	-0.0015	0.0005	897.458	897.46	0.03483	17.674	13.514	0.9989	0		Unknown	0		FALSE	TPK3	sp|P05986|KAPC_YEAST	cAMP-dependent protein kinase type 3	sp|P06244|KAPA_YEAST, sp|P06245|KAPB_YEAST
20180918_Lumos_RSLC6_Reiter_Ammerer_MFPL_onbead_Tpk1_1_1.34383.34383.2	FPPFFNEDVK		2	5416.22	620.306	620.305	-0.0019	0.0001	1238.6	1238.6	5.665e-07	24.221	11.323	1	0		Unknown	0		TRUE	TPK1	sp|P06244|KAPA_YEAST	cAMP-dependent protein kinase type 1
20180918_Lumos_RSLC6_Reiter_Ammerer_MFPL_onbead_Tpk1_1_1.34401.34401.3	LMLSIVTHPFIIR	LM[147]LSIVTHPFIIR	3	5419.07	519.306	519.305	-0.0017	0.0003	1554.89	1554.9	1.756e-08	45.497	36.757	1	0	2M(15.9949)	Unknown	0		TRUE	TPK1	sp|P06244|KAPA_YEAST	cAMP-dependent protein kinase type 1
20180918_Lumos_RSLC6_Reiter_Ammerer_MFPL_onbead_Tpk1_1_1.34455.34455.2	LMLSIVTHPFIIR	LM[147]LSIVTHPFIIR	2	5426.97	778.455	778.453	-0.0031	-0.0011	1554.89	1554.9	1.371e-06	26.833	19.528	1	0	2M(15.9949)	Unknown	0		TRUE	TPK1	sp|P06244|KAPA_YEAST	cAMP-dependent protein kinase type 1
20180918_Lumos_RSLC6_Reiter_Ammerer_MFPL_onbead_Tpk1_1_1.34572.34572.2	ITDFGFAK		2	5445.08	449.737	449.737	-0.0012	0.0008	897.458	897.46	0.004377	19.558	15.357	0.9999	0		Unknown	0		FALSE	TPK3	sp|P05986|KAPC_YEAST	cAMP-dependent protein kinase type 3	sp|P06244|KAPA_YEAST, sp|P06245|KAPB_YEAST
20180918_Lumos_RSLC6_Reiter_Ammerer_MFPL_onbead_Tpk1_1_1.34604.34604.2	FPPFFNEDVK		2	5449.88	620.306	620.305	-0.0015	0.0005	1238.6	1238.6	1.926e-07	24.222	11.361	1	0		Unknown	0		TRUE	TPK1	sp|P06244|KAPA_YEAST	cAMP-dependent protein kinase type 1
20180918_Lumos_RSLC6_Reiter_Ammerer_MFPL_onbead_Tpk1_1_1.34830.34830.2	FPPFFNEDVK		2	5483.18	620.306	620.305	-0.002	0	1238.6	1238.6	2.941e-08	25.968	11.448	1	0		Unknown	0		TRUE	TPK1	sp|P06244|KAPA_YEAST	cAMP-dependent protein kinase type 1
20180918_Lumos_RSLC6_Reiter_Ammerer_MFPL_onbead_Tpk1_1_1.35047.35047.2	FPPFFNEDVK		2	5515.17	620.306	620.305	-0.0016	0.0004	1238.6	1238.6	1.633e-07	24.22	11.348	1	0		Unknown	0		TRUE	TPK1	sp|P06244|KAPA_YEAST	cAMP-dependent protein kinase type 1
20180918_Lumos_RSLC6_Reiter_Ammerer_MFPL_onbead_Tpk1_1_1.35083.35083.2	DLKPENILLDK		2	5520.41	649.372	670.874	43.0036	43.0056	1339.73	1296.73	0.0005512	22.25	22.25	0.9993	0		43.0058:Ala->Asn (Ala->Asn substitution), 43.0058:Carbamyl (Carbamylation)	0		FALSE	TPK3	sp|P05986|KAPC_YEAST	cAMP-dependent protein kinase type 3	sp|P06244|KAPA_YEAST, sp|P34244|HSL1_YEAST, sp|P38147|CHK1_YEAST, sp|Q03407|PKH1_YEAST
20180918_Lumos_RSLC6_Reiter_Ammerer_MFPL_onbead_Tpk1_1_1.35150.35150.2	ITDFGFAK		2	5530.53	449.737	450.263	1.0514	1.0534	898.511	897.46	0.8221	16.657	16.249	0.9779	0		Unknown	0		FALSE	TPK3	sp|P05986|KAPC_YEAST	cAMP-dependent protein kinase type 3	sp|P06244|KAPA_YEAST, sp|P06245|KAPB_YEAST
20180918_Lumos_RSLC6_Reiter_Ammerer_MFPL_onbead_Tpk1_1_1.35266.35266.2	ITDFGFAK		2	5547.58	449.737	449.737	-0.0011	0.0009	897.459	897.46	0.02359	18.187	15.53	0.9991	0		Unknown	0		FALSE	TPK3	sp|P05986|KAPC_YEAST	cAMP-dependent protein kinase type 3	sp|P06244|KAPA_YEAST, sp|P06245|KAPB_YEAST
20180918_Lumos_RSLC6_Reiter_Ammerer_MFPL_onbead_Tpk1_1_1.35272.35272.2	FPPFFNEDVK		2	5548.44	620.306	620.305	-0.0012	0.0008	1238.6	1238.6	1.542e-07	24.217	11.341	1	0		Unknown	0		TRUE	TPK1	sp|P06244|KAPA_YEAST	cAMP-dependent protein kinase type 1
20180918_Lumos_RSLC6_Reiter_Ammerer_MFPL_onbead_Tpk1_1_1.35476.35476.2	FPPFFNEDVK		2	5579.49	620.306	620.305	-0.0017	0.0003	1238.6	1238.6	4.235e-07	24.185	11.26	1	0		Unknown	0		TRUE	TPK1	sp|P06244|KAPA_YEAST	cAMP-dependent protein kinase type 1
20180918_Lumos_RSLC6_Reiter_Ammerer_MFPL_onbead_Tpk1_1_1.35503.35503.2	ITDFGFAK		2	5583.82	449.737	449.736	-0.0017	0.0003	897.458	897.46	0.06438	18.548	15.888	0.9986	0		Unknown	0		FALSE	TPK3	sp|P05986|KAPC_YEAST	cAMP-dependent protein kinase type 3	sp|P06244|KAPA_YEAST, sp|P06245|KAPB_YEAST
20180918_Lumos_RSLC6_Reiter_Ammerer_MFPL_onbead_Tpk1_1_1.35605.35605.3	FPPFFNEDVKDLLSR		3	5599.11	608.649	527.275	-244.123	-244.121	1578.8	1822.93	4.99e-09	44.342	20.209	1	0		Unknown	0		TRUE	TPK1	sp|P06244|KAPA_YEAST	cAMP-dependent protein kinase type 1
20180918_Lumos_RSLC6_Reiter_Ammerer_MFPL_onbead_Tpk1_1_1.35670.35670.2	FPPFFNEDVK		2	5608.88	620.306	498.279	-244.054	-244.053	994.543	1238.6	0.01038	18.071	13.897	0.9337	0		Unknown	0		TRUE	TPK1	sp|P06244|KAPA_YEAST	cAMP-dependent protein kinase type 1
20180918_Lumos_RSLC6_Reiter_Ammerer_MFPL_onbead_Tpk1_1_1.35682.35682.3	FPPFFNEDVK		3	5610.66	413.873	546.593	398.16	398.162	1636.76	1238.6	0.001239	24.594	18.408	0.9833	0		Unknown	0		FALSE	TPK1	sp|P06244|KAPA_YEAST	cAMP-dependent protein kinase type 1
20180918_Lumos_RSLC6_Reiter_Ammerer_MFPL_onbead_Tpk1_1_1.35689.35689.2	FPPFFNEDVK		2	5611.68	620.306	620.305	-0.0014	0.0006	1238.6	1238.6	4.639e-07	24.202	11.302	1	0		Unknown	0		TRUE	TPK1	sp|P06244|KAPA_YEAST	cAMP-dependent protein kinase type 1
20180918_Lumos_RSLC6_Reiter_Ammerer_MFPL_onbead_Tpk1_1_1.35724.35724.2	FPPFFNEDVK		2	5617.24	620.306	498.246	-244.12	-244.118	994.477	1238.6	0.02981	18.08	15.48	0.8364	0		Unknown	0		TRUE	TPK1	sp|P06244|KAPA_YEAST	cAMP-dependent protein kinase type 1
20180918_Lumos_RSLC6_Reiter_Ammerer_MFPL_onbead_Tpk1_1_1.35791.35791.2	ITDFGFAK		2	5627.37	449.737	449.737	-0.0009	0.0011	897.459	897.46	0.005056	18.286	13.97	0.9998	0		Unknown	0		FALSE	TPK3	sp|P05986|KAPC_YEAST	cAMP-dependent protein kinase type 3	sp|P06245|KAPB_YEAST, sp|P06244|KAPA_YEAST
20180918_Lumos_RSLC6_Reiter_Ammerer_MFPL_onbead_Tpk1_1_1.35905.35905.2	FPPFFNEDVK		2	5644.44	620.306	620.305	-0.0016	0.0004	1238.6	1238.6	1.345e-07	24.193	11.345	1	0		Unknown	0		TRUE	TPK1	sp|P06244|KAPA_YEAST	cAMP-dependent protein kinase type 1
20180918_Lumos_RSLC6_Reiter_Ammerer_MFPL_onbead_Tpk1_1_1.36125.36125.2	FPPFFNEDVK		2	5677.83	620.306	620.305	-0.0016	0.0004	1238.6	1238.6	1.373e-07	24.19	11.316	1	0		Unknown	0		TRUE	TPK1	sp|P06244|KAPA_YEAST	cAMP-dependent protein kinase type 1
20180918_Lumos_RSLC6_Reiter_Ammerer_MFPL_onbead_Tpk1_1_1.36136.36136.2	ITDFGFAK		2	5679.6	449.737	449.737	-0.0011	0.0009	897.458	897.46	0.06858	17.485	14.823	0.9986	0		Unknown	0		FALSE	TPK3	sp|P05986|KAPC_YEAST	cAMP-dependent protein kinase type 3	sp|P06244|KAPA_YEAST, sp|P06245|KAPB_YEAST
20180918_Lumos_RSLC6_Reiter_Ammerer_MFPL_onbead_Tpk1_1_1.36337.36337.2	FPPFFNEDVK		2	5709.9	620.306	620.305	-0.0017	0.0003	1238.6	1238.6	1.331e-07	24.259	11.387	1	0		Unknown	0		TRUE	TPK1	sp|P06244|KAPA_YEAST	cAMP-dependent protein kinase type 1
20180918_Lumos_RSLC6_Reiter_Ammerer_MFPL_onbead_Tpk1_1_1.36432.36432.2	ITDFGFAK		2	5724.31	449.737	450.255	1.0351	1.0371	898.495	897.46	0.02073	16	12.413	0.9991	0		Unknown	0		FALSE	TPK3	sp|P05986|KAPC_YEAST	cAMP-dependent protein kinase type 3	sp|P06244|KAPA_YEAST, sp|P06245|KAPB_YEAST
20180918_Lumos_RSLC6_Reiter_Ammerer_MFPL_onbead_Tpk1_1_1.36561.36561.2	FPPFFNEDVK		2	5744.35	620.306	620.305	-0.0016	0.0004	1238.6	1238.6	1.353e-07	24.238	11.429	1	0		Unknown	0		TRUE	TPK1	sp|P06244|KAPA_YEAST	cAMP-dependent protein kinase type 1
20180918_Lumos_RSLC6_Reiter_Ammerer_MFPL_onbead_Tpk1_1_1.36597.36597.2	ITDFGFAK		2	5749.75	449.737	450.24	1.005	1.007	898.465	897.46	0.02067	17.329	13.221	0.9991	0		0.9970:Label:15N(1) (15N(1))	0		FALSE	TPK3	sp|P05986|KAPC_YEAST	cAMP-dependent protein kinase type 3	sp|P06244|KAPA_YEAST, sp|P06245|KAPB_YEAST
20180918_Lumos_RSLC6_Reiter_Ammerer_MFPL_onbead_Tpk1_1_1.36770.36770.2	FPPFFNEDVK		2	5776.33	620.306	620.305	-0.001	0.001	1238.6	1238.6	2.288e-07	24.339	11.512	1	0		Unknown	0		TRUE	TPK1	sp|P06244|KAPA_YEAST	cAMP-dependent protein kinase type 1
20180918_Lumos_RSLC6_Reiter_Ammerer_MFPL_onbead_Tpk1_1_1.36776.36776.4	LGNLQNGTEDVKNHPWFK		4	5777.38	525.018	565.544	162.103	162.105	2258.15	2096.04	1.414e-06	31.076	16.409	1	0		Unknown	0		TRUE	TPK1	sp|P06244|KAPA_YEAST	cAMP-dependent protein kinase type 1
20180918_Lumos_RSLC6_Reiter_Ammerer_MFPL_onbead_Tpk1_1_1.36794.36794.3	LGNLQNGTEDVKNHPWFK		3	5780.11	699.689	754.394	164.116	164.118	2260.16	2096.04	0.01946	21.116	17.015	0.7551	0		Unknown	0		TRUE	TPK1	sp|P06244|KAPA_YEAST	cAMP-dependent protein kinase type 1
20180918_Lumos_RSLC6_Reiter_Ammerer_MFPL_onbead_Tpk1_1_3.42020.42020.4	YVPDVTYTLCGTPDYIAPEVVSTKPYNK	YVPDVT[181]YTLCGTPDYIAPEVVSTKPYNK	4	5912.02	804.133	926.66	490.108	490.11	3702.61	3212.5	0.0004232	27.046	27.046	1	0	6T(79.9663)	Unknown	0		FALSE	TPK3	sp|P05986|KAPC_YEAST	cAMP-dependent protein kinase type 3	sp|P06244|KAPA_YEAST
20180918_Lumos_RSLC6_Reiter_Ammerer_MFPL_onbead_Tpk1_1_1.37525.37525.4	YVPDVTYTLCGTPDYIAPEVVSTKPYNK	YVPDVT[181]YTLCGTPDYIAPEVVSTKPYNK	4	5891.13	804.133	926.66	490.107	490.109	3702.61	3212.5	0.02088	24.288	24.288	0.9952	0	6T(79.9663)	Unknown	0		FALSE	TPK3	sp|P05986|KAPC_YEAST	cAMP-dependent protein kinase type 3	sp|P06244|KAPA_YEAST
20180918_Lumos_RSLC6_Reiter_Ammerer_MFPL_onbead_Tpk1_1_2.41439.41439.4	YVPDVTYTLCGTPDYIAPEVVSTKPYNK	YVPDVT[181]YTLCGTPDYIAPEVVSTKPYNK	4	5902.49	804.133	926.659	490.104	490.106	3702.61	3212.5	0.0302	21.417	21.417	0.9069	0	6T(79.9663)	Unknown	0		FALSE	TPK3	sp|P05986|KAPC_YEAST	cAMP-dependent protein kinase type 3	sp|P06244|KAPA_YEAST
20180918_Lumos_RSLC6_Reiter_Ammerer_MFPL_onbead_Tpk1_3_1.38465.38465.4	YVPDVTYTLCGTPDYIAPEVVSTKPYNK	YVPDVT[181]YTLCGTPDYIAPEVVSTKPYNK	4	5888.02	804.133	926.659	490.103	490.106	3702.61	3212.5	1.616e-05	31.06	31.06	1	0	6T(79.9663)	Unknown	0		FALSE	TPK3	sp|P05986|KAPC_YEAST	cAMP-dependent protein kinase type 3	sp|P06244|KAPA_YEAST
20180918_Lumos_RSLC6_Reiter_Ammerer_MFPL_onbead_Tpk1_1_1.36876.36876.3	LGNLQNGTEDVKNHPWFK		3	5792.35	699.689	753.723	162.103	162.105	2258.15	2096.04	0.0002466	24.003	18.037	0.9993	0		Unknown	0		TRUE	TPK1	sp|P06244|KAPA_YEAST	cAMP-dependent protein kinase type 1
20180918_Lumos_RSLC6_Reiter_Ammerer_MFPL_onbead_Tpk1_2_2.38115.38115.4	YVPDVTYTLCGTPDYIAPEVVSTKPYNK	YVPDVT[181]YTLCGTPDYIAPEVVSTKPYNK	4	5912.58	804.133	926.409	489.103	489.105	3701.61	3212.5	0.2062	22.336	22.336	0.4452	0	6T(79.9663)	Unknown	0		FALSE	TPK3	sp|P05986|KAPC_YEAST	cAMP-dependent protein kinase type 3	sp|P06244|KAPA_YEAST
20180918_Lumos_RSLC6_Reiter_Ammerer_MFPL_onbead_Tpk1_1_1.36989.36989.2	FPPFFNEDVK		2	5809.3	620.306	620.305	-0.0009	0.0011	1238.6	1238.6	6.431e-07	24.327	11.541	1	0		Unknown	0		TRUE	TPK1	sp|P06244|KAPA_YEAST	cAMP-dependent protein kinase type 1
20180918_Lumos_RSLC6_Reiter_Ammerer_MFPL_onbead_Tpk1_1_1.36998.36998.2	ITDFGFAK		2	5810.68	449.737	449.31	-0.8551	-0.8531	896.605	897.46	2.146	17.839	17.266	0.3913	0		Unknown	0		FALSE	TPK3	sp|P05986|KAPC_YEAST	cAMP-dependent protein kinase type 3	sp|P06244|KAPA_YEAST, sp|P06245|KAPB_YEAST
20180918_Lumos_RSLC6_Reiter_Ammerer_MFPL_onbead_Tpk1_1_1.37006.37006.3	LMLSIVTHPFIIR		3	5811.92	513.974	513.974	-0.0015	0.0005	1538.9	1538.9	1.459e-07	44.322	36.858	1	0		Unknown	0		TRUE	TPK1	sp|P06244|KAPA_YEAST	cAMP-dependent protein kinase type 1
20180918_Lumos_RSLC6_Reiter_Ammerer_MFPL_onbead_Tpk1_1_1.37010.37010.4	LGNLQNGTEDVKNHPWFK		4	5812.53	525.018	565.794	163.102	163.104	2259.15	2096.04	0.004319	24.471	18.412	0.9953	0		Unknown	0		TRUE	TPK1	sp|P06244|KAPA_YEAST	cAMP-dependent protein kinase type 1
20180918_Lumos_RSLC6_Reiter_Ammerer_MFPL_onbead_Tpk1_1_1.37015.37015.3	FPPFFNEDVKDLLSR		3	5813.3	608.649	560.298	-145.053	-145.051	1677.87	1822.93	3.23e-10	39.075	18.988	1	0		Unknown	0		TRUE	TPK1	sp|P06244|KAPA_YEAST	cAMP-dependent protein kinase type 1
20180918_Lumos_RSLC6_Reiter_Ammerer_MFPL_onbead_Tpk1_1_1.37024.37024.3	FPPFFNEDVKDLLSR		3	5814.76	608.649	560.632	-144.052	-144.05	1678.87	1822.93	0.0272	17.794	14.3	0.3286	0		Unknown	0		TRUE	TPK1	sp|P06244|KAPA_YEAST	cAMP-dependent protein kinase type 1
20180918_Lumos_RSLC6_Reiter_Ammerer_MFPL_onbead_Tpk1_1_1.40416.40416.4	ITDFGFAKYVPDVTYTLCGTPDYIAPEVVSTKPYNK	IT[181]DFGFAKY[243]VPDVTYTLCGTPDYIAPEVVSTKPYNK	4	6334.68	1043.99	1165.31	485.309	485.311	4657.23	4171.92	1.21e-07	33.131	33.131	1	0	2T(79.9663), 9Y(79.9663)	Unknown	0		FALSE	TPK3	sp|P05986|KAPC_YEAST	cAMP-dependent protein kinase type 3	sp|P06244|KAPA_YEAST
20180918_Lumos_RSLC6_Reiter_Ammerer_MFPL_onbead_Tpk1_1_1.37051.37051.2	LMLSIVTHPFIIR		2	5818.91	770.458	770.457	-0.0019	0.0001	1538.9	1538.9	6.623e-07	28.31	22.218	1	0		Unknown	0		TRUE	TPK1	sp|P06244|KAPA_YEAST	cAMP-dependent protein kinase type 1
20180918_Lumos_RSLC6_Reiter_Ammerer_MFPL_onbead_Tpk1_1_1.37120.37120.3	YPEEDINYGVQGEDPYADLFR		3	5829.67	830.708	873.74	129.096	129.098	2618.2	2489.1	1.132e-06	33.572	33.024	0.9999	0		Unknown	0		TRUE	TPK1	sp|P06244|KAPA_YEAST	cAMP-dependent protein kinase type 1
20180918_Lumos_RSLC6_Reiter_Ammerer_MFPL_onbead_Tpk1_1_1.37155.37155.2	ITDFGFAK		2	5834.87	449.737	449.736	-0.0014	0.0006	897.458	897.46	2.14	16.868	15.156	0.9585	0		Unknown	0		FALSE	TPK3	sp|P05986|KAPC_YEAST	cAMP-dependent protein kinase type 3	sp|P06244|KAPA_YEAST, sp|P06245|KAPB_YEAST
20180918_Lumos_RSLC6_Reiter_Ammerer_MFPL_onbead_Tpk1_1_1.37228.37228.2	FPPFFNEDVK		2	5846.3	620.306	620.305	-0.0019	0.0001	1238.6	1238.6	5.365e-08	24.465	11.699	1	0		Unknown	0		TRUE	TPK1	sp|P06244|KAPA_YEAST	cAMP-dependent protein kinase type 1
20180918_Lumos_RSLC6_Reiter_Ammerer_MFPL_onbead_Tpk1_1_1.37476.37476.2	FPPFFNEDVK		2	5883.94	620.306	620.305	-0.0014	0.0006	1238.6	1238.6	3.988e-08	26.093	11.74	1	0		Unknown	0		TRUE	TPK1	sp|P06244|KAPA_YEAST	cAMP-dependent protein kinase type 1
20180918_Lumos_RSLC6_Reiter_Ammerer_MFPL_onbead_Tpk1_4_2.42908.42908.4	ITDFGFAKYVPDVTYTLCGTPDYIAPEVVSTKPYNK	IT[181]DFGFAKY[243]VPDVTYTLCGTPDYIAPEVVSTKPYNK	4	6343.34	1043.99	1165.31	485.308	485.311	4657.23	4171.92	2.331e-07	33.709	33.709	1	0	2T(79.9663), 9Y(79.9663)	Unknown	0		FALSE	TPK3	sp|P05986|KAPC_YEAST	cAMP-dependent protein kinase type 3	sp|P06244|KAPA_YEAST
20180918_Lumos_RSLC6_Reiter_Ammerer_MFPL_onbead_Tpk1_1_1.37640.37640.2	FPPFFNEDVK		2	5908.4	620.306	649.318	58.024	58.026	1296.62	1238.6	0.7304	15.691	15.127	0.5352	0		58.0293:Carbofuran (2,3-dihydro-2,2-dimethyl-7-benzofuranol N-methyl carbamate), 58.0207:Gln->Trp (Gln->Trp substitution)	0		TRUE	TPK1	sp|P06244|KAPA_YEAST	cAMP-dependent protein kinase type 1
20180918_Lumos_RSLC6_Reiter_Ammerer_MFPL_onbead_Tpk1_1_1.37670.37670.2	FPPFFNEDVK		2	5912.99	620.306	649.317	58.0227	58.0247	1296.62	1238.6	3.506	15.599	14.68	0.2613	0		58.0293:Carbofuran (2,3-dihydro-2,2-dimethyl-7-benzofuranol N-methyl carbamate), 58.0207:Gln->Trp (Gln->Trp substitution)	0		TRUE	TPK1	sp|P06244|KAPA_YEAST	cAMP-dependent protein kinase type 1
20180918_Lumos_RSLC6_Reiter_Ammerer_MFPL_onbead_Tpk1_1_1.37717.37717.2	FPPFFNEDVK		2	5920.23	620.306	620.305	-0.0009	0.0011	1238.6	1238.6	3.546e-06	24.706	13.092	1	0		Unknown	0		TRUE	TPK1	sp|P06244|KAPA_YEAST	cAMP-dependent protein kinase type 1
20180918_Lumos_RSLC6_Reiter_Ammerer_MFPL_onbead_Tpk1_1_1.37796.37796.2	VTSGKYSLQDFQILR		2	5932.29	877.976	899.477	43.003	43.005	1796.94	1753.94	2.932e-07	34.912	28.468	1	0		43.0058:Ala->Asn (Ala->Asn substitution), 43.0058:Carbamyl (Carbamylation)	0		TRUE	TPK1	sp|P06244|KAPA_YEAST	cAMP-dependent protein kinase type 1
20180918_Lumos_RSLC6_Reiter_Ammerer_MFPL_onbead_Tpk1_1_1.37964.37964.2	FPPFFNEDVK		2	5957.9	620.306	620.305	-0.0014	0.0006	1238.6	1238.6	7.824e-07	24.829	12.709	1	0		Unknown	0		TRUE	TPK1	sp|P06244|KAPA_YEAST	cAMP-dependent protein kinase type 1
20180918_Lumos_RSLC6_Reiter_Ammerer_MFPL_onbead_Tpk1_1_1.37973.37973.2	YSLQDFQILR		2	5959.34	641.843	641.842	-0.0016	0.0004	1281.67	1281.67	2.995e-05	25.516	20.453	1	0		Unknown	0		TRUE	TPK1	sp|P06244|KAPA_YEAST	cAMP-dependent protein kinase type 1
20180918_Lumos_RSLC6_Reiter_Ammerer_MFPL_onbead_Tpk1_1_1.38000.38000.3	YSLSDFQILR	YSLS[167]DFQILR	3	5963.64	441.211	440.88	-0.9933	-0.9913	1319.62	1320.61	0.007755	18.485	14.507	0.9871	0	4S(79.9663)	-0.9840:Amidated (Amidation), -0.9840:Asp->Asn (Asp->Asn substitution), -0.9840:Glu->Gln (Glu->Gln substitution)	0		TRUE	TPK3	sp|P05986|KAPC_YEAST	cAMP-dependent protein kinase type 3
20180918_Lumos_RSLC6_Reiter_Ammerer_MFPL_onbead_Tpk1_1_1.38172.38172.2	YSLQDFQILR		2	5990.1	641.843	641.842	-0.0017	0.0003	1281.67	1281.67	0.001157	25.461	20.275	0.9999	0		Unknown	0		TRUE	TPK1	sp|P06244|KAPA_YEAST	cAMP-dependent protein kinase type 1
20180918_Lumos_RSLC6_Reiter_Ammerer_MFPL_onbead_Tpk1_1_1.38214.38214.3	YSLSDFQILR	YSLS[167]DFQILR	3	5996.61	441.211	440.879	-0.9953	-0.9933	1319.62	1320.61	0.04897	15.971	12.568	0.9372	0	4S(79.9663)	-0.9840:Glu->Gln (Glu->Gln substitution), -0.9840:Amidated (Amidation), -0.9840:Asp->Asn (Asp->Asn substitution)	0		TRUE	TPK3	sp|P05986|KAPC_YEAST	cAMP-dependent protein kinase type 3
20180918_Lumos_RSLC6_Reiter_Ammerer_MFPL_onbead_Tpk1_1_1.38231.38231.2	FPPFFNEDVK		2	5999.18	620.306	620.306	-0.0008	0.0012	1238.6	1238.6	5.071e-07	26.518	22.308	1	0		Unknown	0		TRUE	TPK1	sp|P06244|KAPA_YEAST	cAMP-dependent protein kinase type 1
20180918_Lumos_RSLC6_Reiter_Ammerer_MFPL_onbead_Tpk1_1_1.38241.38241.3	YSLSDFQILR	YSLS[167]DFQILR	3	6000.74	441.211	441.214	0.0095	0.0115	1320.62	1320.61	0.05045	15.957	12.538	0.9983	0	4S(79.9663)	Unknown	0		TRUE	TPK3	sp|P05986|KAPC_YEAST	cAMP-dependent protein kinase type 3
20180918_Lumos_RSLC6_Reiter_Ammerer_MFPL_onbead_Tpk1_1_1.38391.38391.2	YSLQDFQILR		2	6024.31	641.843	641.842	-0.0017	0.0003	1281.67	1281.67	3.03e-05	25.593	20.448	1	0		Unknown	0		TRUE	TPK1	sp|P06244|KAPA_YEAST	cAMP-dependent protein kinase type 1
20180918_Lumos_RSLC6_Reiter_Ammerer_MFPL_onbead_Tpk1_4_2.42879.42879.4	ITDFGFAKYVPDVTYTLCGTPDYIAPEVVSTKPYNK	IT[181]DFGFAKY[243]VPDVTYTLCGTPDYIAPEVVSTKPYNK	4	6339.9	1043.99	1165.31	485.308	485.31	4657.23	4171.92	8.288e-07	33.799	33.799	1	0	2T(79.9663), 9Y(79.9663)	Unknown	0		FALSE	TPK3	sp|P05986|KAPC_YEAST	cAMP-dependent protein kinase type 3	sp|P06244|KAPA_YEAST
20180918_Lumos_RSLC6_Reiter_Ammerer_MFPL_onbead_Tpk1_3_1.33637.33637.4	YVPDVTYTLCGTPDYIAPEVVSTKPYNK		4	5235.69	784.141	901.681	470.159	470.161	3602.69	3132.54	2.747e-07	32.79	32.302	1	0		470.1636:dHex(1)Hex(2) (Hex2dHex1)	0		FALSE	TPK3	sp|P05986|KAPC_YEAST	cAMP-dependent protein kinase type 3	sp|P06244|KAPA_YEAST
20180918_Lumos_RSLC6_Reiter_Ammerer_MFPL_onbead_Tpk1_4_1.33007.33007.4	YVPDVTYTLCGTPDYIAPEVVSTKPYNK		4	5226.2	784.141	901.431	469.158	469.16	3601.69	3132.54	9.9e-10	40.887	40.548	1	0		Unknown	0		FALSE	TPK3	sp|P05986|KAPC_YEAST	cAMP-dependent protein kinase type 3	sp|P06244|KAPA_YEAST
20180918_Lumos_RSLC6_Reiter_Ammerer_MFPL_onbead_Tpk1_4_1.33016.33016.4	YVPDVTYTLCGTPDYIAPEVVSTKPYNK		4	5227.31	784.141	901.43	469.156	469.158	3601.69	3132.54	1.272e-08	35.491	35.229	1	0		Unknown	0		FALSE	TPK3	sp|P05986|KAPC_YEAST	cAMP-dependent protein kinase type 3	sp|P06244|KAPA_YEAST
20180918_Lumos_RSLC6_Reiter_Ammerer_MFPL_onbead_Tpk1_1_2.35999.35999.4	YVPDVTYTLCGTPDYIAPEVVSTKPYNK		4	5223.62	784.141	901.429	469.152	469.155	3601.69	3132.54	2.795e-06	32.73	32.576	1	0		Unknown	0		FALSE	TPK3	sp|P05986|KAPC_YEAST	cAMP-dependent protein kinase type 3	sp|P06244|KAPA_YEAST
20180918_Lumos_RSLC6_Reiter_Ammerer_MFPL_onbead_Tpk1_3_1.32177.32177.4	YVPDVTYTLCGTPDYIAPEVVSTKPYNK		4	5040.54	784.141	897.422	453.123	453.125	3585.66	3132.54	7.248e-07	36.833	35.316	1	0		Unknown	0		FALSE	TPK3	sp|P05986|KAPC_YEAST	cAMP-dependent protein kinase type 3	sp|P06244|KAPA_YEAST
20180918_Lumos_RSLC6_Reiter_Ammerer_MFPL_onbead_Tpk1_1_1.38606.38606.2	YSLQDFQILR		2	6056.23	641.843	641.842	-0.0019	0.0001	1281.67	1281.67	0.001169	25.455	20.437	0.9999	0		Unknown	0		TRUE	TPK1	sp|P06244|KAPA_YEAST	cAMP-dependent protein kinase type 1
20180918_Lumos_RSLC6_Reiter_Ammerer_MFPL_onbead_Tpk1_3_3.43112.43112.3	YVPDVTYTLCGTPDYIAPEVVSTKPYNK		3	6361.61	1045.19	1189.2	432.048	432.05	3564.58	3132.54	1.918e-06	30.784	29.308	1	0		Unknown	0		FALSE	TPK3	sp|P05986|KAPC_YEAST	cAMP-dependent protein kinase type 3	sp|P06244|KAPA_YEAST
20180918_Lumos_RSLC6_Reiter_Ammerer_MFPL_onbead_Tpk1_1_3.45710.45710.3	YVPDVTYTLCGTPDYIAPEVVSTKPYNK		3	6380.88	1045.19	1188.87	431.052	431.054	3563.59	3132.54	1.373e-07	36.246	36.246	1	0		Unknown	0		FALSE	TPK3	sp|P05986|KAPC_YEAST	cAMP-dependent protein kinase type 3	sp|P06244|KAPA_YEAST
20180918_Lumos_RSLC6_Reiter_Ammerer_MFPL_onbead_Tpk1_1_3.45647.45647.3	YVPDVTYTLCGTPDYIAPEVVSTKPYNK		3	6372.93	1045.19	1188.87	431.051	431.053	3563.59	3132.54	2.588e-09	39.173	39.173	1	0		Unknown	0		FALSE	TPK3	sp|P05986|KAPC_YEAST	cAMP-dependent protein kinase type 3	sp|P06244|KAPA_YEAST
20180918_Lumos_RSLC6_Reiter_Ammerer_MFPL_onbead_Tpk1_1_1.40562.40562.3	YVPDVTYTLCGTPDYIAPEVVSTKPYNK		3	6357.34	1045.19	1188.87	431.041	431.043	3563.58	3132.54	7.771e-09	36.681	36.681	1	0		Unknown	0		FALSE	TPK3	sp|P05986|KAPC_YEAST	cAMP-dependent protein kinase type 3	sp|P06244|KAPA_YEAST
20180918_Lumos_RSLC6_Reiter_Ammerer_MFPL_onbead_Tpk1_1_1.38647.38647.3	YPEEDINYGVQGEDPYADLFR		3	6062.29	830.708	929.444	296.208	296.21	2785.31	2489.1	0.0004959	30.625	28.351	1	0		Unknown	0		TRUE	TPK1	sp|P06244|KAPA_YEAST	cAMP-dependent protein kinase type 1
20180918_Lumos_RSLC6_Reiter_Ammerer_MFPL_onbead_Tpk1_1_1.38657.38657.2	FPPFFNEDVK		2	6063.72	620.306	620.305	-0.0021	-0.0001	1238.59	1238.6	2.079e-06	24.81	13.548	1	0		Unknown	0		TRUE	TPK1	sp|P06244|KAPA_YEAST	cAMP-dependent protein kinase type 1
20180918_Lumos_RSLC6_Reiter_Ammerer_MFPL_onbead_Tpk1_1_3.45591.45591.3	YVPDVTYTLCGTPDYIAPEVVSTKPYNK		3	6365.79	1045.19	1188.54	430.052	430.054	3562.59	3132.54	4.948e-10	39.105	39.105	1	0		Unknown	0		FALSE	TPK3	sp|P05986|KAPC_YEAST	cAMP-dependent protein kinase type 3	sp|P06244|KAPA_YEAST
20180918_Lumos_RSLC6_Reiter_Ammerer_MFPL_onbead_Tpk1_1_2.45077.45077.3	YVPDVTYTLCGTPDYIAPEVVSTKPYNK		3	6359.01	1045.19	1188.54	430.048	430.05	3562.58	3132.54	1.156e-11	42.795	42.795	1	0		Unknown	0		FALSE	TPK3	sp|P05986|KAPC_YEAST	cAMP-dependent protein kinase type 3	sp|P06244|KAPA_YEAST
20180918_Lumos_RSLC6_Reiter_Ammerer_MFPL_onbead_Tpk1_2_2.41498.41498.3	YVPDVTYTLCGTPDYIAPEVVSTKPYNK		3	6375.62	1045.19	1188.54	430.047	430.049	3562.58	3132.54	8.54e-10	41.483	41.483	1	0		Unknown	0		FALSE	TPK3	sp|P05986|KAPC_YEAST	cAMP-dependent protein kinase type 3	sp|P06244|KAPA_YEAST
20180918_Lumos_RSLC6_Reiter_Ammerer_MFPL_onbead_Tpk1_4_2.43096.43096.3	YVPDVTYTLCGTPDYIAPEVVSTKPYNK		3	6365.92	1045.19	1188.53	430.046	430.048	3562.58	3132.54	1.885e-10	44.751	44.751	1	0		Unknown	0		FALSE	TPK3	sp|P05986|KAPC_YEAST	cAMP-dependent protein kinase type 3	sp|P06244|KAPA_YEAST
20180918_Lumos_RSLC6_Reiter_Ammerer_MFPL_onbead_Tpk1_1_1.38827.38827.2	YSLQDFQILR		2	6089.9	641.843	641.842	-0.0014	0.0006	1281.67	1281.67	0.1134	22.965	22.087	0.9983	0		Unknown	0		TRUE	TPK1	sp|P06244|KAPA_YEAST	cAMP-dependent protein kinase type 1
20180918_Lumos_RSLC6_Reiter_Ammerer_MFPL_onbead_Tpk1_1_1.40480.40480.3	YVPDVTYTLCGTPDYIAPEVVSTKPYNK		3	6344.47	1045.19	1188.53	430.046	430.048	3562.58	3132.54	1.268e-08	37.174	37.174	1	0		Unknown	0		FALSE	TPK3	sp|P05986|KAPC_YEAST	cAMP-dependent protein kinase type 3	sp|P06244|KAPA_YEAST
20180918_Lumos_RSLC6_Reiter_Ammerer_MFPL_onbead_Tpk1_1_1.38859.38859.2	FPPFFNEDVK		2	6094.53	620.306	620.306	-0.0001	0.0019	1238.6	1238.6	7.021e-05	23.514	14.41	1	0		Unknown	0		TRUE	TPK1	sp|P06244|KAPA_YEAST	cAMP-dependent protein kinase type 1
20180918_Lumos_RSLC6_Reiter_Ammerer_MFPL_onbead_Tpk1_1_1.40578.40578.3	YVPDVTYTLCGTPDYIAPEVVSTKPYNK		3	6359.89	1045.19	1188.2	429.047	429.049	3561.58	3132.54	3.795e-09	38.971	38.971	1	0		Unknown	0		FALSE	TPK3	sp|P05986|KAPC_YEAST	cAMP-dependent protein kinase type 3	sp|P06244|KAPA_YEAST
20180918_Lumos_RSLC6_Reiter_Ammerer_MFPL_onbead_Tpk1_2_3.43093.43093.3	YVPDVTYTLCGTPDYIAPEVVSTKPYNK		3	6370.9	1045.19	1188.2	429.042	429.044	3561.58	3132.54	1.492e-08	36.062	36.062	1	0		Unknown	0		FALSE	TPK3	sp|P05986|KAPC_YEAST	cAMP-dependent protein kinase type 3	sp|P06244|KAPA_YEAST
20180918_Lumos_RSLC6_Reiter_Ammerer_MFPL_onbead_Tpk1_2_1.42594.42594.3	YVPDVTYTLCGTPDYIAPEVVSTKPYNK		3	6345.41	1045.19	1188.2	429.038	429.041	3561.57	3132.54	4.505e-10	39.228	39.228	1	0		Unknown	0		FALSE	TPK3	sp|P05986|KAPC_YEAST	cAMP-dependent protein kinase type 3	sp|P06244|KAPA_YEAST
20180918_Lumos_RSLC6_Reiter_Ammerer_MFPL_onbead_Tpk1_1_1.38948.38948.4	LGNLQNGTEDVKNHPWFK		4	6108.78	525.018	566.041	164.09	164.092	2260.13	2096.04	0.000307	28.983	23.821	1	0		Unknown	0		TRUE	TPK1	sp|P06244|KAPA_YEAST	cAMP-dependent protein kinase type 1
20180918_Lumos_RSLC6_Reiter_Ammerer_MFPL_onbead_Tpk1_1_3.45737.45737.3	YVPDVTYTLCGTPDYIAPEVVSTKPYNK		3	6384.07	1045.19	1187.87	428.041	428.043	3560.58	3132.54	4.691e-10	39.964	39.964	1	0		Unknown	0		FALSE	TPK3	sp|P05986|KAPC_YEAST	cAMP-dependent protein kinase type 3	sp|P06244|KAPA_YEAST
20180918_Lumos_RSLC6_Reiter_Ammerer_MFPL_onbead_Tpk1_3_2.37878.37878.5	ITDFGFAKYVPDVTYTLCGTPDYIAPEVVSTKPYNK	IT[181]DFGFAKY[243]VPDVT[181]YTLCGTPDYIAPEVVSTKPYNK	5	5536.57	851.384	936.839	427.275	427.277	4679.16	4251.88	1.119e-05	27.535	27.535	1	0	2T(79.9663), 9Y(79.9663), 14T(79.9663)	Unknown	0		FALSE	TPK3	sp|P05986|KAPC_YEAST	cAMP-dependent protein kinase type 3	sp|P06244|KAPA_YEAST
20180918_Lumos_RSLC6_Reiter_Ammerer_MFPL_onbead_Tpk1_2_1.40499.40499.3	YVPDVTYTLCGTPDYIAPEVVSTKPYNK		3	6058.68	1045.19	1187.18	425.987	425.989	3558.52	3132.54	8.787e-08	33.86	33.86	0.9976	0		Unknown	0		FALSE	TPK3	sp|P05986|KAPC_YEAST	cAMP-dependent protein kinase type 3	sp|P06244|KAPA_YEAST
20180918_Lumos_RSLC6_Reiter_Ammerer_MFPL_onbead_Tpk1_1_1.39201.39201.2	FPPFFNEDVK		2	6148.19	620.306	620.305	-0.0016	0.0004	1238.6	1238.6	0.0002981	21.238	13.268	1	0		Unknown	0		TRUE	TPK1	sp|P06244|KAPA_YEAST	cAMP-dependent protein kinase type 1
20180918_Lumos_RSLC6_Reiter_Ammerer_MFPL_onbead_Tpk1_1_1.39216.39216.2	FPPFFNEDVK		2	6150.61	620.306	620.816	1.0201	1.0221	1239.62	1238.6	0.0006977	21.412	15.261	0.9999	0		Unknown	0		TRUE	TPK1	sp|P06244|KAPA_YEAST	cAMP-dependent protein kinase type 1
20180918_Lumos_RSLC6_Reiter_Ammerer_MFPL_onbead_Tpk1_3_1.39925.39925.3	YVPDVTYTLCGTPDYIAPEVVSTKPYNK		3	6089.88	1045.19	1187.18	425.986	425.988	3558.52	3132.54	7.229e-05	26.238	26.238	0.9929	0		Unknown	0		FALSE	TPK3	sp|P05986|KAPC_YEAST	cAMP-dependent protein kinase type 3	sp|P06244|KAPA_YEAST
20180918_Lumos_RSLC6_Reiter_Ammerer_MFPL_onbead_Tpk1_3_1.39725.39725.3	YVPDVTYTLCGTPDYIAPEVVSTKPYNK		3	6062.81	1045.19	1186.85	424.988	424.99	3557.52	3132.54	1.132e-09	36.948	36.948	1	0		Unknown	0		FALSE	TPK3	sp|P05986|KAPC_YEAST	cAMP-dependent protein kinase type 3	sp|P06244|KAPA_YEAST
20180918_Lumos_RSLC6_Reiter_Ammerer_MFPL_onbead_Tpk1_2_2.39427.39427.3	YVPDVTYTLCGTPDYIAPEVVSTKPYNK		3	6089.03	1045.19	1186.85	424.986	424.988	3557.52	3132.54	2.54e-09	36.344	36.344	1	0		Unknown	0		FALSE	TPK3	sp|P05986|KAPC_YEAST	cAMP-dependent protein kinase type 3	sp|P06244|KAPA_YEAST
20180918_Lumos_RSLC6_Reiter_Ammerer_MFPL_onbead_Tpk1_2_1.40484.40484.3	YVPDVTYTLCGTPDYIAPEVVSTKPYNK		3	6056.5	1045.19	1186.85	424.984	424.986	3557.52	3132.54	4.041e-07	31.451	31.451	0.9964	0		Unknown	0		FALSE	TPK3	sp|P05986|KAPC_YEAST	cAMP-dependent protein kinase type 3	sp|P06244|KAPA_YEAST
20180918_Lumos_RSLC6_Reiter_Ammerer_MFPL_onbead_Tpk1_2_1.40669.40669.4	YVPDVTYTLCGTPDYIAPEVVSTKPYNK		4	6081.6	784.141	890.387	424.982	424.984	3557.52	3132.54	8.175e-10	39.542	39.542	1	0		Unknown	0		FALSE	TPK3	sp|P05986|KAPC_YEAST	cAMP-dependent protein kinase type 3	sp|P06244|KAPA_YEAST
20180918_Lumos_RSLC6_Reiter_Ammerer_MFPL_onbead_Tpk1_1_1.39338.39338.2	ITDFGFAK		2	6169.56	449.737	449.737	-0.0006	0.0014	897.459	897.46	0.009805	17.421	13.512	0.9997	0		Unknown	0		FALSE	TPK3	sp|P05986|KAPC_YEAST	cAMP-dependent protein kinase type 3	sp|P06245|KAPB_YEAST, sp|P06244|KAPA_YEAST
20180918_Lumos_RSLC6_Reiter_Ammerer_MFPL_onbead_Tpk1_3_1.39726.39726.5	YVPDVTYTLCGTPDYIAPEVVSTKPYNK		5	6062.96	627.514	712.511	424.98	424.983	3557.52	3132.54	5.136e-07	34.565	34.565	1	0		Unknown	0		FALSE	TPK3	sp|P05986|KAPC_YEAST	cAMP-dependent protein kinase type 3	sp|P06244|KAPA_YEAST
20180918_Lumos_RSLC6_Reiter_Ammerer_MFPL_onbead_Tpk1_3_1.39829.39829.5	YVPDVTYTLCGTPDYIAPEVVSTKPYNK		5	6076.63	627.514	712.51	424.98	424.982	3557.52	3132.54	4.811e-07	31.625	31.625	1	0		Unknown	0		FALSE	TPK3	sp|P05986|KAPC_YEAST	cAMP-dependent protein kinase type 3	sp|P06244|KAPA_YEAST
20180918_Lumos_RSLC6_Reiter_Ammerer_MFPL_onbead_Tpk1_3_1.39658.39658.4	YVPDVTYTLCGTPDYIAPEVVSTKPYNK		4	6053.55	784.141	890.386	424.979	424.981	3557.51	3132.54	4.875e-10	40.792	40.792	1	0		Unknown	0		FALSE	TPK3	sp|P05986|KAPC_YEAST	cAMP-dependent protein kinase type 3	sp|P06244|KAPA_YEAST
20180918_Lumos_RSLC6_Reiter_Ammerer_MFPL_onbead_Tpk1_1_1.38737.38737.4	YVPDVTYTLCGTPDYIAPEVVSTKPYNK		4	6075.92	784.141	890.137	423.982	423.984	3556.52	3132.54	1.249e-06	30.147	30.147	1	0		Unknown	0		FALSE	TPK3	sp|P05986|KAPC_YEAST	cAMP-dependent protein kinase type 3	sp|P06244|KAPA_YEAST
20180918_Lumos_RSLC6_Reiter_Ammerer_MFPL_onbead_Tpk1_3_3.41320.41320.4	YVPDVTYTLCGTPDYIAPEVVSTKPYNK		4	6092.6	784.141	890.137	423.981	423.983	3556.52	3132.54	1.066e-09	39.754	39.754	1	0		Unknown	0		FALSE	TPK3	sp|P05986|KAPC_YEAST	cAMP-dependent protein kinase type 3	sp|P06244|KAPA_YEAST
20180918_Lumos_RSLC6_Reiter_Ammerer_MFPL_onbead_Tpk1_1_1.39469.39469.2	FPPFFNEDVK		2	6189.71	620.306	620.305	-0.0023	-0.0003	1238.59	1238.6	2.106	11.987	10.065	0.9588	0		Unknown	0		TRUE	TPK1	sp|P06244|KAPA_YEAST	cAMP-dependent protein kinase type 1
20180918_Lumos_RSLC6_Reiter_Ammerer_MFPL_onbead_Tpk1_1_3.43550.43550.4	YVPDVTYTLCGTPDYIAPEVVSTKPYNK		4	6103.73	784.141	890.136	423.981	423.983	3556.52	3132.54	2.299e-08	33.159	33.159	1	0		Unknown	0		FALSE	TPK3	sp|P05986|KAPC_YEAST	cAMP-dependent protein kinase type 3	sp|P06244|KAPA_YEAST
20180918_Lumos_RSLC6_Reiter_Ammerer_MFPL_onbead_Tpk1_3_3.41067.41067.4	YVPDVTYTLCGTPDYIAPEVVSTKPYNK		4	6055.16	784.141	890.136	423.98	423.982	3556.52	3132.54	1.356e-10	35.795	35.795	1	0		Unknown	0		FALSE	TPK3	sp|P05986|KAPC_YEAST	cAMP-dependent protein kinase type 3	sp|P06244|KAPA_YEAST
20180918_Lumos_RSLC6_Reiter_Ammerer_MFPL_onbead_Tpk1_2_3.40953.40953.5	YVPDVTYTLCGTPDYIAPEVVSTKPYNK		5	6061.03	627.514	712.311	423.98	423.982	3556.52	3132.54	3.985e-07	31.521	31.521	1	0		Unknown	0		FALSE	TPK3	sp|P05986|KAPC_YEAST	cAMP-dependent protein kinase type 3	sp|P06244|KAPA_YEAST
20180918_Lumos_RSLC6_Reiter_Ammerer_MFPL_onbead_Tpk1_3_1.39673.39673.4	YVPDVTYTLCGTPDYIAPEVVSTKPYNK		4	6055.59	784.141	889.885	422.976	422.979	3555.51	3132.54	4.735e-09	30.234	30.234	1	0		Unknown	0		FALSE	TPK3	sp|P05986|KAPC_YEAST	cAMP-dependent protein kinase type 3	sp|P06244|KAPA_YEAST
20180918_Lumos_RSLC6_Reiter_Ammerer_MFPL_onbead_Tpk1_1_1.39569.39569.4	LGNLQNGTEDVKNHPWFK		4	6205.24	525.018	565.79	163.088	163.09	2259.13	2096.04	0.05327	21.883	17.316	0.9134	0		Unknown	0		TRUE	TPK1	sp|P06244|KAPA_YEAST	cAMP-dependent protein kinase type 1
20180918_Lumos_RSLC6_Reiter_Ammerer_MFPL_onbead_Tpk1_2_1.40325.40325.4	YVPDVTYTLCGTPDYIAPEVVSTKPYNK		4	6037.03	784.141	886.891	410.997	410.999	3543.53	3132.54	5.618e-09	45.165	45.165	1	0		Unknown	0		FALSE	TPK3	sp|P05986|KAPC_YEAST	cAMP-dependent protein kinase type 3	sp|P06244|KAPA_YEAST
20180918_Lumos_RSLC6_Reiter_Ammerer_MFPL_onbead_Tpk1_1_1.39591.39591.3	YPEEDINYGVQGEDPYADLFR		3	6208.7	830.708	912.082	244.123	244.125	2733.22	2489.1	1.053e-08	36.848	33.866	1	0		Unknown	0		TRUE	TPK1	sp|P06244|KAPA_YEAST	cAMP-dependent protein kinase type 1
20180918_Lumos_RSLC6_Reiter_Ammerer_MFPL_onbead_Tpk1_4_1.38763.38763.4	YVPDVTYTLCGTPDYIAPEVVSTKPYNK		4	6043.94	784.141	886.889	410.992	410.994	3543.53	3132.54	1.382e-11	51.215	51.215	1	0		Unknown	0		FALSE	TPK3	sp|P05986|KAPC_YEAST	cAMP-dependent protein kinase type 3	sp|P06244|KAPA_YEAST
20180918_Lumos_RSLC6_Reiter_Ammerer_MFPL_onbead_Tpk1_2_2.39191.39191.4	YVPDVTYTLCGTPDYIAPEVVSTKPYNK		4	6058.45	784.141	886.647	410.022	410.024	3542.56	3132.54	2.945e-12	51.253	51.253	1	0		Unknown	0		FALSE	TPK3	sp|P05986|KAPC_YEAST	cAMP-dependent protein kinase type 3	sp|P06244|KAPA_YEAST
20180918_Lumos_RSLC6_Reiter_Ammerer_MFPL_onbead_Tpk1_2_2.39235.39235.3	YVPDVTYTLCGTPDYIAPEVVSTKPYNK		3	6064.05	1045.19	1181.86	410.017	410.019	3542.55	3132.54	5.052e-09	37.416	37.416	1	0		Unknown	0		FALSE	TPK3	sp|P05986|KAPC_YEAST	cAMP-dependent protein kinase type 3	sp|P06244|KAPA_YEAST
20180918_Lumos_RSLC6_Reiter_Ammerer_MFPL_onbead_Tpk1_2_3.40876.40876.4	YVPDVTYTLCGTPDYIAPEVVSTKPYNK		4	6049.45	784.141	886.645	410.016	410.018	3542.55	3132.54	3.251e-11	51.962	51.091	1	0		Unknown	0		FALSE	TPK3	sp|P05986|KAPC_YEAST	cAMP-dependent protein kinase type 3	sp|P06244|KAPA_YEAST
20180918_Lumos_RSLC6_Reiter_Ammerer_MFPL_onbead_Tpk1_1_2.42779.42779.4	YVPDVTYTLCGTPDYIAPEVVSTKPYNK		4	6071.36	784.141	886.645	410.015	410.017	3542.55	3132.54	5.093e-10	51.108	51.108	1	0		Unknown	0		FALSE	TPK3	sp|P05986|KAPC_YEAST	cAMP-dependent protein kinase type 3	sp|P06244|KAPA_YEAST
20180918_Lumos_RSLC6_Reiter_Ammerer_MFPL_onbead_Tpk1_4_2.40521.40521.4	YVPDVTYTLCGTPDYIAPEVVSTKPYNK		4	6057.24	784.141	886.642	410.002	410.005	3542.54	3132.54	2.472e-12	51.184	51.184	1	0		Unknown	0		FALSE	TPK3	sp|P05986|KAPC_YEAST	cAMP-dependent protein kinase type 3	sp|P06244|KAPA_YEAST
20180918_Lumos_RSLC6_Reiter_Ammerer_MFPL_onbead_Tpk1_1_1.39718.39718.3	YPEEDINYGVQGEDPYADLFR	Y[243]PEEDINYGVQGEDPYADLFR	3	6227.94	857.363	1003.79	439.284	439.286	3008.35	2569.07	1.736e-08	35.96	33.235	1	0	1Y(79.9663)	Unknown	0		FALSE	TPK1	sp|P06244|KAPA_YEAST	cAMP-dependent protein kinase type 1
20180918_Lumos_RSLC6_Reiter_Ammerer_MFPL_onbead_Tpk1_1_1.39720.39720.3	YPEEDINYGVQGEDPYADLFR		3	6228.25	830.708	961.105	391.191	391.193	2880.29	2489.1	1.236e-09	41.369	35.838	1	0		Unknown	0		TRUE	TPK1	sp|P06244|KAPA_YEAST	cAMP-dependent protein kinase type 1
20180918_Lumos_RSLC6_Reiter_Ammerer_MFPL_onbead_Tpk1_1_1.39728.39728.2	YPEEDINYGVQGEDPYADLFR		2	6229.49	1245.56	1066.52	-358.08	-358.078	2131.02	2489.1	1.245e-07	27.248	26.317	1	0		Unknown	0		TRUE	TPK1	sp|P06244|KAPA_YEAST	cAMP-dependent protein kinase type 1
20180918_Lumos_RSLC6_Reiter_Ammerer_MFPL_onbead_Tpk1_2_2.39346.39346.3	YVPDVTYTLCGTPDYIAPEVVSTKPYNK		3	6078.38	1045.19	1181.85	410	410.002	3542.54	3132.54	6.234e-08	34.746	34.746	1	0		Unknown	0		FALSE	TPK3	sp|P05986|KAPC_YEAST	cAMP-dependent protein kinase type 3	sp|P06244|KAPA_YEAST
20180918_Lumos_RSLC6_Reiter_Ammerer_MFPL_onbead_Tpk1_1_1.39736.39736.3	YPEEDINYGVQGEDPYADLFR		3	6230.79	830.708	961.106	391.194	391.196	2880.3	2489.1	1.549e-11	44.095	38.657	1	0		Unknown	0		TRUE	TPK1	sp|P06244|KAPA_YEAST	cAMP-dependent protein kinase type 1
20180918_Lumos_RSLC6_Reiter_Ammerer_MFPL_onbead_Tpk1_1_1.39786.39786.2	FPPFFNEDVK		2	6238.47	620.306	620.304	-0.0027	-0.0007	1238.59	1238.6	5.253e-07	24.727	12.529	1	0		Unknown	0		TRUE	TPK1	sp|P06244|KAPA_YEAST	cAMP-dependent protein kinase type 1
20180918_Lumos_RSLC6_Reiter_Ammerer_MFPL_onbead_Tpk1_3_3.41108.41108.4	YVPDVTYTLCGTPDYIAPEVVSTKPYNK		4	6061.31	784.141	886.641	410	410.002	3542.54	3132.54	2.55e-11	49.136	49.136	1	0		Unknown	0		FALSE	TPK3	sp|P05986|KAPC_YEAST	cAMP-dependent protein kinase type 3	sp|P06244|KAPA_YEAST
20180918_Lumos_RSLC6_Reiter_Ammerer_MFPL_onbead_Tpk1_1_1.39794.39794.2	ITDFGFAK		2	6239.7	449.737	449.737	-0.0003	0.0017	897.459	897.46	0.01571	17.334	13.307	0.9994	0		Unknown	0		FALSE	TPK3	sp|P05986|KAPC_YEAST	cAMP-dependent protein kinase type 3	sp|P06244|KAPA_YEAST, sp|P06245|KAPB_YEAST
20180918_Lumos_RSLC6_Reiter_Ammerer_MFPL_onbead_Tpk1_1_1.39824.39824.4	NIETPYEPPIQQGQGDTSQFDKYPEEDINYGVQGEDPYADLFR		4	6244.3	1241.57	1280.84	157.105	157.107	5119.35	4962.24	2.822e-08	36.994	36.994	1	0		Unknown	0		TRUE	TPK1	sp|P06244|KAPA_YEAST	cAMP-dependent protein kinase type 1
20180918_Lumos_RSLC6_Reiter_Ammerer_MFPL_onbead_Tpk1_4_2.40578.40578.3	YVPDVTYTLCGTPDYIAPEVVSTKPYNK		3	6063.8	1045.19	1181.85	409.997	409.999	3542.53	3132.54	1.046e-08	36.486	36.486	1	0		Unknown	0		FALSE	TPK3	sp|P05986|KAPC_YEAST	cAMP-dependent protein kinase type 3	sp|P06244|KAPA_YEAST
20180918_Lumos_RSLC6_Reiter_Ammerer_MFPL_onbead_Tpk1_4_2.40490.40490.4	YVPDVTYTLCGTPDYIAPEVVSTKPYNK		4	6053.23	784.141	886.639	409.989	409.991	3542.53	3132.54	5.645e-10	45.236	45.236	1	0		Unknown	0		FALSE	TPK3	sp|P05986|KAPC_YEAST	cAMP-dependent protein kinase type 3	sp|P06244|KAPA_YEAST
20180918_Lumos_RSLC6_Reiter_Ammerer_MFPL_onbead_Tpk1_2_2.39262.39262.3	YVPDVTYTLCGTPDYIAPEVVSTKPYNK		3	6067.37	1045.19	1181.53	409.019	409.022	3541.56	3132.54	7.747e-12	42.982	42.982	1	0		Unknown	0		FALSE	TPK3	sp|P05986|KAPC_YEAST	cAMP-dependent protein kinase type 3	sp|P06244|KAPA_YEAST
20180918_Lumos_RSLC6_Reiter_Ammerer_MFPL_onbead_Tpk1_1_3.43231.43231.4	YVPDVTYTLCGTPDYIAPEVVSTKPYNK		4	6063.31	784.141	886.395	409.013	409.016	3541.55	3132.54	7.685e-12	49.134	49.134	1	0		Unknown	0		FALSE	TPK3	sp|P05986|KAPC_YEAST	cAMP-dependent protein kinase type 3	sp|P06244|KAPA_YEAST
20180918_Lumos_RSLC6_Reiter_Ammerer_MFPL_onbead_Tpk1_1_1.40007.40007.2	VTSGKYSLQDFQILR		2	6272.36	877.976	641.842	-472.266	-472.264	1281.67	1753.94	0.01339	22.394	22.073	0.4225	0		Unknown	0		TRUE	TPK1	sp|P06244|KAPA_YEAST	cAMP-dependent protein kinase type 1
20180918_Lumos_RSLC6_Reiter_Ammerer_MFPL_onbead_Tpk1_4_3.41861.41861.3	YVPDVTYTLCGTPDYIAPEVVSTKPYNK		3	6077.54	1045.19	1181.52	409.013	409.015	3541.55	3132.54	5.91e-09	39.466	39.466	1	0		Unknown	0		FALSE	TPK3	sp|P05986|KAPC_YEAST	cAMP-dependent protein kinase type 3	sp|P06244|KAPA_YEAST
20180918_Lumos_RSLC6_Reiter_Ammerer_MFPL_onbead_Tpk1_1_1.40044.40044.3	YPEEDINYGVQGEDPYADLFR	Y[243]PEEDINY[243]GVQGEDPYADLFR	3	6277.95	884.019	1032.8	446.347	446.349	3095.38	2649.03	4.003e-05	33.225	20.424	1	0	1Y(79.9663), 8Y(79.9663)	Unknown	0		FALSE	TPK1	sp|P06244|KAPA_YEAST	cAMP-dependent protein kinase type 1
20180918_Lumos_RSLC6_Reiter_Ammerer_MFPL_onbead_Tpk1_1_1.40079.40079.3	YPEEDINYGVQGEDPYADLFR	Y[243]PEEDINY[243]GVQGEDPYADLFR	3	6283.25	884.019	1033.14	447.352	447.354	3096.39	2649.03	5.495e-05	33.169	20.508	0.992	0	1Y(79.9663), 8Y(79.9663)	Unknown	0		FALSE	TPK1	sp|P06244|KAPA_YEAST	cAMP-dependent protein kinase type 1
20180918_Lumos_RSLC6_Reiter_Ammerer_MFPL_onbead_Tpk1_1_1.40264.40264.2	FPPFFNEDVK		2	6311.08	620.306	620.305	-0.0015	0.0005	1238.6	1238.6	6.76e-06	22.319	12.295	1	0		Unknown	0		TRUE	TPK1	sp|P06244|KAPA_YEAST	cAMP-dependent protein kinase type 1
20180918_Lumos_RSLC6_Reiter_Ammerer_MFPL_onbead_Tpk1_3_1.39654.39654.4	YVPDVTYTLCGTPDYIAPEVVSTKPYNK		4	6052.98	784.141	886.394	409.009	409.011	3541.55	3132.54	1.978e-12	52.098	52.098	1	0		Unknown	0		FALSE	TPK3	sp|P05986|KAPC_YEAST	cAMP-dependent protein kinase type 3	sp|P06244|KAPA_YEAST
20180918_Lumos_RSLC6_Reiter_Ammerer_MFPL_onbead_Tpk1_3_2.41785.41785.4	YVPDVTYTLCGTPDYIAPEVVSTKPYNK		4	6063.66	784.141	886.391	408.998	409	3541.53	3132.54	5.953e-12	51.177	51.177	1	0		Unknown	0		FALSE	TPK3	sp|P05986|KAPC_YEAST	cAMP-dependent protein kinase type 3	sp|P06244|KAPA_YEAST
20180918_Lumos_RSLC6_Reiter_Ammerer_MFPL_onbead_Tpk1_1_3.43227.43227.3	YVPDVTYTLCGTPDYIAPEVVSTKPYNK		3	6062.76	1045.19	1181.52	408.997	408.999	3541.53	3132.54	2.965e-11	41.418	41.406	1	0		Unknown	0		FALSE	TPK3	sp|P05986|KAPC_YEAST	cAMP-dependent protein kinase type 3	sp|P06244|KAPA_YEAST
20180918_Lumos_RSLC6_Reiter_Ammerer_MFPL_onbead_Tpk1_1_3.43225.43225.4	YVPDVTYTLCGTPDYIAPEVVSTKPYNK		4	6062.6	784.141	886.388	408.986	408.988	3541.52	3132.54	5.419e-11	49.054	49.054	1	0		Unknown	0		FALSE	TPK3	sp|P05986|KAPC_YEAST	cAMP-dependent protein kinase type 3	sp|P06244|KAPA_YEAST
20180918_Lumos_RSLC6_Reiter_Ammerer_MFPL_onbead_Tpk1_1_1.38542.38542.4	YVPDVTYTLCGTPDYIAPEVVSTKPYNK		4	6046.68	784.141	886.146	408.019	408.021	3540.55	3132.54	3.428e-12	49.147	49.147	1	0		Unknown	0		FALSE	TPK3	sp|P05986|KAPC_YEAST	cAMP-dependent protein kinase type 3	sp|P06244|KAPA_YEAST
20180918_Lumos_RSLC6_Reiter_Ammerer_MFPL_onbead_Tpk1_1_1.40522.40522.2	YSLQDFQILR		2	6351.05	641.843	642.345	1.0031	1.0051	1282.67	1281.67	0.01533	22.19	21.801	0.9993	0		0.9970:Label:15N(1) (15N(1))	0		TRUE	TPK1	sp|P06244|KAPA_YEAST	cAMP-dependent protein kinase type 1
20180918_Lumos_RSLC6_Reiter_Ammerer_MFPL_onbead_Tpk1_1_3.43252.43252.4	YVPDVTYTLCGTPDYIAPEVVSTKPYNK		4	6065.45	784.141	886.144	408.013	408.015	3540.55	3132.54	8.533e-11	46.314	46.314	1	0		Unknown	0		FALSE	TPK3	sp|P05986|KAPC_YEAST	cAMP-dependent protein kinase type 3	sp|P06244|KAPA_YEAST
20180918_Lumos_RSLC6_Reiter_Ammerer_MFPL_onbead_Tpk1_2_1.40299.40299.4	YVPDVTYTLCGTPDYIAPEVVSTKPYNK		4	6033.61	784.141	886.144	408.011	408.013	3540.55	3132.54	1.479e-12	51.232	51.232	1	0		Unknown	0		FALSE	TPK3	sp|P05986|KAPC_YEAST	cAMP-dependent protein kinase type 3	sp|P06244|KAPA_YEAST
20180918_Lumos_RSLC6_Reiter_Ammerer_MFPL_onbead_Tpk1_2_2.41318.41318.4	ITDFGFAKYVPDVTYTLCGTPDYIAPEVVSTKPYNK	IT[181]DFGFAKY[243]VPDVT[181]YTLCGTPDYIAPEVVSTKPYNK	4	6350.33	1063.98	1165.81	407.341	407.343	4659.23	4251.88	1.639e-07	33.086	33.086	1	0	2T(79.9663), 9Y(79.9663), 14T(79.9663)	Unknown	0		FALSE	TPK3	sp|P05986|KAPC_YEAST	cAMP-dependent protein kinase type 3	sp|P06244|KAPA_YEAST
20180918_Lumos_RSLC6_Reiter_Ammerer_MFPL_onbead_Tpk1_4_1.40661.40661.4	ITDFGFAKYVPDVTYTLCGTPDYIAPEVVSTKPYNK	IT[181]DFGFAKY[243]VPDVT[181]YTLCGTPDYIAPEVVSTKPYNK	4	6319.05	1063.98	1165.57	406.347	406.349	4658.23	4251.88	6.179e-07	30.83	30.83	1	0	2T(79.9663), 9Y(79.9663), 14T(79.9663)	Unknown	0		FALSE	TPK3	sp|P05986|KAPC_YEAST	cAMP-dependent protein kinase type 3	sp|P06244|KAPA_YEAST
20180918_Lumos_RSLC6_Reiter_Ammerer_MFPL_onbead_Tpk1_2_1.42435.42435.4	ITDFGFAKYVPDVTYTLCGTPDYIAPEVVSTKPYNK	IT[181]DFGFAKY[243]VPDVT[181]YTLCGTPDYIAPEVVSTKPYNK	4	6323.49	1063.98	1165.56	406.343	406.345	4658.23	4251.88	9.702e-09	36.37	33.584	1	0	2T(79.9663), 9Y(79.9663), 14T(79.9663)	Unknown	0		FALSE	TPK3	sp|P05986|KAPC_YEAST	cAMP-dependent protein kinase type 3	sp|P06244|KAPA_YEAST
20180918_Lumos_RSLC6_Reiter_Ammerer_MFPL_onbead_Tpk1_1_1.40773.40773.2	EVVWEKLLSR		2	6390.32	629.861	651.364	43.0044	43.0064	1300.71	1257.71	0.001703	22.3	15.84	0.9848	0		43.0058:Carbamyl (Carbamylation), 43.0058:Ala->Asn (Ala->Asn substitution)	0		TRUE	TPK1	sp|P06244|KAPA_YEAST	cAMP-dependent protein kinase type 1
20180918_Lumos_RSLC6_Reiter_Ammerer_MFPL_onbead_Tpk1_1_1.40797.40797.2	FPPFFNEDVK		2	6394.01	620.306	620.305	-0.0012	0.0008	1238.6	1238.6	0.0004345	19.97	13.379	1	0		Unknown	0		TRUE	TPK1	sp|P06244|KAPA_YEAST	cAMP-dependent protein kinase type 1
20180918_Lumos_RSLC6_Reiter_Ammerer_MFPL_onbead_Tpk1_1_3.45477.45477.4	ITDFGFAKYVPDVTYTLCGTPDYIAPEVVSTKPYNK	IT[181]DFGFAKY[243]VPDVT[181]YTLCGTPDYIAPEVVSTKPYNK	4	6351.64	1063.98	1165.31	405.341	405.343	4657.23	4251.88	1.381e-07	33.534	30.813	1	0	2T(79.9663), 9Y(79.9663), 14T(79.9663)	Unknown	0		FALSE	TPK3	sp|P05986|KAPC_YEAST	cAMP-dependent protein kinase type 3	sp|P06244|KAPA_YEAST
20180918_Lumos_RSLC6_Reiter_Ammerer_MFPL_onbead_Tpk1_1_2.44858.44858.4	ITDFGFAKYVPDVTYTLCGTPDYIAPEVVSTKPYNK	IT[181]DFGFAKY[243]VPDVT[181]YTLCGTPDYIAPEVVSTKPYNK	4	6332.88	1063.98	1165.06	404.335	404.337	4656.22	4251.88	3.318e-08	39.47	36.624	1	0	2T(79.9663), 9Y(79.9663), 14T(79.9663)	Unknown	0		FALSE	TPK3	sp|P05986|KAPC_YEAST	cAMP-dependent protein kinase type 3	sp|P06244|KAPA_YEAST
20180918_Lumos_RSLC6_Reiter_Ammerer_MFPL_onbead_Tpk1_1_1.41018.41018.2	FPPFFNEDVK		2	6428.43	620.306	620.807	1.0025	1.0045	1239.6	1238.6	0.0003263	18.756	11.918	1	0		0.9970:Label:15N(1) (15N(1))	0		TRUE	TPK1	sp|P06244|KAPA_YEAST	cAMP-dependent protein kinase type 1
20180918_Lumos_RSLC6_Reiter_Ammerer_MFPL_onbead_Tpk1_4_3.34667.34667.4	YVPDVTYTLCGTPDYIAPEVVSTKPYNK	YVPDVTYTLC[160]GTPDYIAPEVVSTKPYNK	4	5082.39	798.397	897.922	398.103	398.105	3587.66	3189.56	5.291e-05	29.063	27.458	1	0	10C(57.0215)	Unknown	0		FALSE	TPK3	sp|P05986|KAPC_YEAST	cAMP-dependent protein kinase type 3	sp|P06244|KAPA_YEAST
20180918_Lumos_RSLC6_Reiter_Ammerer_MFPL_onbead_Tpk1_4_2.40440.40440.3	YVPDVTYTLCGTPDYIAPEVVSTKPYNK		3	6047.17	1045.19	1174.87	389.037	389.039	3521.57	3132.54	1.544e-08	36.27	36.27	1	0		Unknown	0		FALSE	TPK3	sp|P05986|KAPC_YEAST	cAMP-dependent protein kinase type 3	sp|P06244|KAPA_YEAST
20180918_Lumos_RSLC6_Reiter_Ammerer_MFPL_onbead_Tpk1_1_1.41088.41088.2	YPEEDINYGVQGEDPYADLFR		2	6439.44	1245.56	1165.03	-161.058	-161.056	2328.04	2489.1	6.891e-08	32.557	30.685	1	0		Unknown	0		TRUE	TPK1	sp|P06244|KAPA_YEAST	cAMP-dependent protein kinase type 1
20180918_Lumos_RSLC6_Reiter_Ammerer_MFPL_onbead_Tpk1_1_1.41445.41445.5	FPNPVAKFYAAEVCLALEYLHSK	FPNPVAKFY[243]AAEVC[160]LALEYLHSK	5	6495.36	550.272	639.29	445.092	445.094	3191.41	2746.32	0.02949	20.075	16.378	0.8917	0	9Y(79.9663), 14C(57.0215)	445.0890:Hex(1)HexNAc(1)Sulf(1) (Hex HexNAc Sulf), 445.0985:Hex(1)HexNAc(1)Phos(1) (Hex HexNAc Phos)	0		FALSE	TPK3	sp|P05986|KAPC_YEAST	cAMP-dependent protein kinase type 3	sp|P06244|KAPA_YEAST
20180918_Lumos_RSLC6_Reiter_Ammerer_MFPL_onbead_Tpk1_1_1.41123.41123.3	YPEEDINYGVQGEDPYADLFR		3	6444.91	830.708	776.687	-162.062	-162.06	2327.04	2489.1	4.674e-06	32.667	31.47	0.9996	0		Unknown	0		TRUE	TPK1	sp|P06244|KAPA_YEAST	cAMP-dependent protein kinase type 1
20180918_Lumos_RSLC6_Reiter_Ammerer_MFPL_onbead_Tpk1_1_2.50909.50909.3	FYAAEVCLALEYLHSKDIIYR		3	7122.02	839.766	956.136	349.108	349.11	2865.39	2516.28	0.000416	29.859	28.561	0.9816	0		Unknown	0		FALSE	TPK3	sp|P05986|KAPC_YEAST	cAMP-dependent protein kinase type 3	sp|P06244|KAPA_YEAST
20180918_Lumos_RSLC6_Reiter_Ammerer_MFPL_onbead_Tpk1_4_1.45155.45155.4	FYAAEVCLALEYLHSKDIIYR		4	7001.9	630.077	706.846	307.077	307.079	2823.35	2516.28	0.1785	22.19	19.331	0.9904	0		Unknown	0		FALSE	TPK3	sp|P05986|KAPC_YEAST	cAMP-dependent protein kinase type 3	sp|P06244|KAPA_YEAST
20180918_Lumos_RSLC6_Reiter_Ammerer_MFPL_onbead_Tpk1_2_2.44658.44658.3	FYAAEVCLALEYLHSK		3	6835.33	619.647	722.004	307.071	307.073	2162.99	1855.92	0.02443	22.342	17.812	0.9579	0		Unknown	0		FALSE	TPK3	sp|P05986|KAPC_YEAST	cAMP-dependent protein kinase type 3	sp|P06244|KAPA_YEAST
20180918_Lumos_RSLC6_Reiter_Ammerer_MFPL_onbead_Tpk1_1_1.41160.41160.2	YSLQDFQILR		2	6450.73	641.843	641.843	-0.0005	0.0015	1281.67	1281.67	0.01549	22.155	21.753	0.9994	0		Unknown	0		TRUE	TPK1	sp|P06244|KAPA_YEAST	cAMP-dependent protein kinase type 1
20180918_Lumos_RSLC6_Reiter_Ammerer_MFPL_onbead_Tpk1_3_2.42692.42692.4	YVPDVTYTLCGTPDYIAPEVVSTKPYNK		4	6188.59	784.141	881.398	389.027	389.03	3521.56	3132.54	9.868e-07	34.125	34.125	1	0		Unknown	0		FALSE	TPK3	sp|P05986|KAPC_YEAST	cAMP-dependent protein kinase type 3	sp|P06244|KAPA_YEAST
20180918_Lumos_RSLC6_Reiter_Ammerer_MFPL_onbead_Tpk1_2_3.46184.46184.4	FYAAEVCLALEYLHSK		4	6847.07	464.987	541.754	307.069	307.071	2162.99	1855.92	0.0001125	29.668	26.954	1	0		Unknown	0		FALSE	TPK3	sp|P05986|KAPC_YEAST	cAMP-dependent protein kinase type 3	sp|P06244|KAPA_YEAST
20180918_Lumos_RSLC6_Reiter_Ammerer_MFPL_onbead_Tpk1_1_1.41242.41242.2	FPPFFNEDVK		2	6463.52	620.306	620.305	-0.0012	0.0008	1238.6	1238.6	9.677e-05	22.225	14.519	1	0		Unknown	0		TRUE	TPK1	sp|P06244|KAPA_YEAST	cAMP-dependent protein kinase type 1
20180918_Lumos_RSLC6_Reiter_Ammerer_MFPL_onbead_Tpk1_1_2.49271.49271.3	FYAAEVCLALEYLHSK		3	6899.47	619.647	722.003	307.069	307.071	2162.99	1855.92	0.02449	21.332	16.526	0.9699	0		Unknown	0		FALSE	TPK3	sp|P05986|KAPC_YEAST	cAMP-dependent protein kinase type 3	sp|P06244|KAPA_YEAST
20180918_Lumos_RSLC6_Reiter_Ammerer_MFPL_onbead_Tpk1_1_1.41314.41314.2	YPEEDINYGVQGEDPYADLFR		2	6474.93	1245.56	1051.48	-388.157	-388.155	2100.94	2489.1	2.007e-10	33.557	28.165	1	0		Unknown	0		TRUE	TPK1	sp|P06244|KAPA_YEAST	cAMP-dependent protein kinase type 1
20180918_Lumos_RSLC6_Reiter_Ammerer_MFPL_onbead_Tpk1_1_1.41439.41439.2	YSLQDFQILR		2	6494.43	641.843	641.842	-0.0017	0.0003	1281.67	1281.67	0.06817	22.059	21.93	0.9986	0		Unknown	0		TRUE	TPK1	sp|P06244|KAPA_YEAST	cAMP-dependent protein kinase type 1
20180918_Lumos_RSLC6_Reiter_Ammerer_MFPL_onbead_Tpk1_4_1.44394.44394.3	FYAAEVCLALEYLHSK		3	6884.02	619.647	722.003	307.068	307.07	2162.99	1855.92	0.02854	22.165	17.764	0.9996	0		Unknown	0		FALSE	TPK3	sp|P05986|KAPC_YEAST	cAMP-dependent protein kinase type 3	sp|P06244|KAPA_YEAST
20180918_Lumos_RSLC6_Reiter_Ammerer_MFPL_onbead_Tpk1_1_1.41526.41526.2	ITDFGFAK		2	6508.13	449.737	449.736	-0.0014	0.0006	897.458	897.46	0.01287	15.567	11.66	0.9995	0		Unknown	0		FALSE	TPK3	sp|P05986|KAPC_YEAST	cAMP-dependent protein kinase type 3	sp|P06245|KAPB_YEAST, sp|P06244|KAPA_YEAST
20180918_Lumos_RSLC6_Reiter_Ammerer_MFPL_onbead_Tpk1_2_1.41363.41363.3	YVPDVTYTLCGTPDYIAPEVVSTKPYNK		3	6175.5	1045.19	1174.53	388.046	388.048	3520.58	3132.54	1.359e-06	32.177	32.177	0.9998	0		Unknown	0		FALSE	TPK3	sp|P05986|KAPC_YEAST	cAMP-dependent protein kinase type 3	sp|P06244|KAPA_YEAST
20180918_Lumos_RSLC6_Reiter_Ammerer_MFPL_onbead_Tpk1_1_1.41550.41550.2	YPEEDINYGVQGEDPYADLFR		2	6511.91	1245.56	1116	-259.113	-259.111	2229.99	2489.1	1.58e-10	33.53	28.089	1	0		Unknown	0		TRUE	TPK1	sp|P06244|KAPA_YEAST	cAMP-dependent protein kinase type 1
20180918_Lumos_RSLC6_Reiter_Ammerer_MFPL_onbead_Tpk1_1_1.41554.41554.3	YPEEDINYGVQGEDPYADLFR		3	6512.53	830.708	744.336	-259.115	-259.113	2229.99	2489.1	7.724e-06	29.874	29.373	0.9965	0		Unknown	0		TRUE	TPK1	sp|P06244|KAPA_YEAST	cAMP-dependent protein kinase type 1
20180918_Lumos_RSLC6_Reiter_Ammerer_MFPL_onbead_Tpk1_1_1.41558.41558.2	ITDFGFAK		2	6513.15	449.737	449.773	0.0721	0.0741	897.532	897.46	0.01178	15.515	11.639	0.9996	0		Unknown	0		FALSE	TPK3	sp|P05986|KAPC_YEAST	cAMP-dependent protein kinase type 3	sp|P06244|KAPA_YEAST, sp|P06245|KAPB_YEAST
20180918_Lumos_RSLC6_Reiter_Ammerer_MFPL_onbead_Tpk1_2_2.45199.45199.3	FYAAEVCLALEYLHSK		3	6917.24	619.647	721.67	306.071	306.073	2161.99	1855.92	0.7276	19.858	17.568	0.5509	0		Unknown	0		FALSE	TPK3	sp|P05986|KAPC_YEAST	cAMP-dependent protein kinase type 3	sp|P06244|KAPA_YEAST
20180918_Lumos_RSLC6_Reiter_Ammerer_MFPL_onbead_Tpk1_1_1.41633.41633.2	FPPFFNEDVK		2	6524.97	620.306	620.305	-0.0011	0.0009	1238.6	1238.6	4.568	12.382	11.19	0.9438	0		Unknown	0		TRUE	TPK1	sp|P06244|KAPA_YEAST	cAMP-dependent protein kinase type 1
20180918_Lumos_RSLC6_Reiter_Ammerer_MFPL_onbead_Tpk1_2_2.40214.40214.3	YVPDVTYTLCGTPDYIAPEVVSTKPYNK		3	6197.97	1045.19	1174.53	388.041	388.043	3520.58	3132.54	9.402e-08	36.429	36.429	1	0		Unknown	0		FALSE	TPK3	sp|P05986|KAPC_YEAST	cAMP-dependent protein kinase type 3	sp|P06244|KAPA_YEAST
20180918_Lumos_RSLC6_Reiter_Ammerer_MFPL_onbead_Tpk1_2_3.41760.41760.4	YVPDVTYTLCGTPDYIAPEVVSTKPYNK		4	6176.48	784.141	881.151	388.04	388.042	3520.58	3132.54	3.322e-09	39.606	39.606	1	0		Unknown	0		FALSE	TPK3	sp|P05986|KAPC_YEAST	cAMP-dependent protein kinase type 3	sp|P06244|KAPA_YEAST
20180918_Lumos_RSLC6_Reiter_Ammerer_MFPL_onbead_Tpk1_4_3.47397.47397.4	FYAAEVCLALEYLHSK		4	6879.7	464.987	541.504	306.07	306.072	2161.99	1855.92	1.662e-07	36.678	33.381	1	0		Unknown	0		FALSE	TPK3	sp|P05986|KAPC_YEAST	cAMP-dependent protein kinase type 3	sp|P06244|KAPA_YEAST
20180918_Lumos_RSLC6_Reiter_Ammerer_MFPL_onbead_Tpk1_4_2.40421.40421.4	YVPDVTYTLCGTPDYIAPEVVSTKPYNK		4	6045.04	784.141	881.15	388.033	388.036	3520.57	3132.54	2.425e-09	45.348	45.348	1	0		Unknown	0		FALSE	TPK3	sp|P05986|KAPC_YEAST	cAMP-dependent protein kinase type 3	sp|P06244|KAPA_YEAST
20180918_Lumos_RSLC6_Reiter_Ammerer_MFPL_onbead_Tpk1_2_2.39133.39133.3	YVPDVTYTLCGTPDYIAPEVVSTKPYNK		3	6051.39	1045.19	1174.2	387.043	387.045	3519.58	3132.54	7.702e-10	39.017	39.017	1	0		Unknown	0		FALSE	TPK3	sp|P05986|KAPC_YEAST	cAMP-dependent protein kinase type 3	sp|P06244|KAPA_YEAST
20180918_Lumos_RSLC6_Reiter_Ammerer_MFPL_onbead_Tpk1_4_3.41984.41984.3	YVPDVTYTLCGTPDYIAPEVVSTKPYNK		3	6094.2	1045.19	1174.2	387.042	387.044	3519.58	3132.54	5.79e-10	39.942	39.942	1	0		Unknown	0		FALSE	TPK3	sp|P05986|KAPC_YEAST	cAMP-dependent protein kinase type 3	sp|P06244|KAPA_YEAST
20180918_Lumos_RSLC6_Reiter_Ammerer_MFPL_onbead_Tpk1_2_2.40523.40523.3	YVPDVTYTLCGTPDYIAPEVVSTKPYNK		3	6240.54	1045.19	1174.2	387.042	387.044	3519.58	3132.54	3.805e-10	39.007	39.007	1	0		Unknown	0		FALSE	TPK3	sp|P05986|KAPC_YEAST	cAMP-dependent protein kinase type 3	sp|P06244|KAPA_YEAST
20180918_Lumos_RSLC6_Reiter_Ammerer_MFPL_onbead_Tpk1_3_1.40926.40926.3	YVPDVTYTLCGTPDYIAPEVVSTKPYNK		3	6232.25	1045.19	1174.2	387.041	387.043	3519.58	3132.54	3.338e-08	36.459	36.459	1	0		Unknown	0		FALSE	TPK3	sp|P05986|KAPC_YEAST	cAMP-dependent protein kinase type 3	sp|P06244|KAPA_YEAST
20180918_Lumos_RSLC6_Reiter_Ammerer_MFPL_onbead_Tpk1_4_3.41714.41714.3	YVPDVTYTLCGTPDYIAPEVVSTKPYNK		3	6057.65	1045.19	1174.2	387.041	387.043	3519.58	3132.54	1.95e-10	40.031	40.031	1	0		Unknown	0		FALSE	TPK3	sp|P05986|KAPC_YEAST	cAMP-dependent protein kinase type 3	sp|P06244|KAPA_YEAST
20180918_Lumos_RSLC6_Reiter_Ammerer_MFPL_onbead_Tpk1_1_1.42148.42148.4	NIETPYEPPIQQGQGDTSQFDKYPEEDINYGVQGEDPYADLFR		4	6605.45	1241.57	1127.77	-455.211	-455.209	4507.03	4962.24	2.431e-09	42.94	20.235	1	0		Unknown	0		TRUE	TPK1	sp|P06244|KAPA_YEAST	cAMP-dependent protein kinase type 1
20180918_Lumos_RSLC6_Reiter_Ammerer_MFPL_onbead_Tpk1_1_1.42182.42182.4	NIETPYEPPIQQGQGDTSQFDKYPEEDINYGVQGEDPYADLFR		4	6610.8	1241.57	1133.26	-433.225	-433.223	4529.02	4962.24	0.0001549	29.434	20.664	1	0		Unknown	0		TRUE	TPK1	sp|P06244|KAPA_YEAST	cAMP-dependent protein kinase type 1
20180918_Lumos_RSLC6_Reiter_Ammerer_MFPL_onbead_Tpk1_1_1.42193.42193.4	NIETPYEPPIQQGQGDTSQFDKYPEEDINYGVQGEDPYADLFR		4	6612.57	1241.57	1288.33	187.036	187.038	5149.28	4962.24	1.025e-10	40.393	40.393	1	0		Unknown	0		TRUE	TPK1	sp|P06244|KAPA_YEAST	cAMP-dependent protein kinase type 1
20180918_Lumos_RSLC6_Reiter_Ammerer_MFPL_onbead_Tpk1_1_1.42220.42220.4	NIETPYEPPIQQGQGDTSQFDKYPEEDINYGVQGEDPYADLFR		4	6616.85	1241.57	1287.83	185.045	185.047	5147.29	4962.24	1.068e-12	44.177	42.192	1	0		Unknown	0		TRUE	TPK1	sp|P06244|KAPA_YEAST	cAMP-dependent protein kinase type 1
20180918_Lumos_RSLC6_Reiter_Ammerer_MFPL_onbead_Tpk1_1_1.42243.42243.4	NIETPYEPPIQQGQGDTSQFDKYPEEDINYGVQGEDPYADLFR		4	6620.42	1241.57	1287.58	184.037	184.039	5146.28	4962.24	3.326e-11	42.131	40.285	1	0		Unknown	0		TRUE	TPK1	sp|P06244|KAPA_YEAST	cAMP-dependent protein kinase type 1
20180918_Lumos_RSLC6_Reiter_Ammerer_MFPL_onbead_Tpk1_1_1.42247.42247.3	FPPFFNEDVKDLLSR		3	6621.03	608.649	608.983	1.0019	1.0039	1823.93	1822.93	1.634e-14	58.768	18.01	1	0		0.9970:Label:15N(1) (15N(1))	0		TRUE	TPK1	sp|P06244|KAPA_YEAST	cAMP-dependent protein kinase type 1
20180918_Lumos_RSLC6_Reiter_Ammerer_MFPL_onbead_Tpk1_1_1.42249.42249.4	NIETPYEPPIQQGQGDTSQFDKYPEEDINYGVQGEDPYADLFR		4	6621.27	1241.57	1287.83	185.041	185.043	5147.28	4962.24	1.064e-12	44.838	42.99	1	0		Unknown	0		TRUE	TPK1	sp|P06244|KAPA_YEAST	cAMP-dependent protein kinase type 1
20180918_Lumos_RSLC6_Reiter_Ammerer_MFPL_onbead_Tpk1_1_1.42263.42263.2	ITDFGFAK		2	6623.58	449.737	449.737	-0.001	0.001	897.459	897.46	0.001134	17.719	12.718	0.9999	0		Unknown	0		FALSE	TPK3	sp|P05986|KAPC_YEAST	cAMP-dependent protein kinase type 3	sp|P06245|KAPB_YEAST, sp|P06244|KAPA_YEAST
20180918_Lumos_RSLC6_Reiter_Ammerer_MFPL_onbead_Tpk1_1_1.42273.42273.2	FPPFFNEDVK		2	6625.17	620.306	620.305	-0.0015	0.0005	1238.6	1238.6	1.096e-05	20.809	11.567	1	0		Unknown	0		TRUE	TPK1	sp|P06244|KAPA_YEAST	cAMP-dependent protein kinase type 1
20180918_Lumos_RSLC6_Reiter_Ammerer_MFPL_onbead_Tpk1_1_1.42278.42278.2	YPEEDINYGVQGEDPYADLFR		2	6625.95	1245.56	1172.02	-147.067	-147.065	2342.03	2489.1	3.124e-10	30.923	25.592	1	0		Unknown	0		TRUE	TPK1	sp|P06244|KAPA_YEAST	cAMP-dependent protein kinase type 1
20180918_Lumos_RSLC6_Reiter_Ammerer_MFPL_onbead_Tpk1_1_1.39387.39387.3	YVPDVTYTLCGTPDYIAPEVVSTKPYNK		3	6177.15	1045.19	1174.2	387.041	387.043	3519.58	3132.54	6.649e-11	39.011	39.011	1	0		Unknown	0		FALSE	TPK3	sp|P05986|KAPC_YEAST	cAMP-dependent protein kinase type 3	sp|P06244|KAPA_YEAST
20180918_Lumos_RSLC6_Reiter_Ammerer_MFPL_onbead_Tpk1_1_1.42319.42319.2	FPPFFNEDVKDLLSR		2	6632.39	912.47	912.468	-0.0033	-0.0013	1822.92	1822.93	5.248e-11	38.433	18.492	1	0		Unknown	0		TRUE	TPK1	sp|P06244|KAPA_YEAST	cAMP-dependent protein kinase type 1
20180918_Lumos_RSLC6_Reiter_Ammerer_MFPL_onbead_Tpk1_1_1.42333.42333.4	NIETPYEPPIQQGQGDTSQFDKYPEEDINYGVQGEDPYADLFR		4	6634.55	1241.57	1152.78	-355.163	-355.161	4607.08	4962.24	3.179e-12	46	43.237	1	0		Unknown	0		TRUE	TPK1	sp|P06244|KAPA_YEAST	cAMP-dependent protein kinase type 1
20180918_Lumos_RSLC6_Reiter_Ammerer_MFPL_onbead_Tpk1_1_1.42336.42336.5	NIETPYEPPIQQGQGDTSQFDKYPEEDINYGVQGEDPYADLFR	NIETPYEPPIQQGQGDT[181]SQFDKYPEEDINYGVQGEDPYADLFR	5	6635.02	1009.45	1034.86	127.056	127.058	5169.26	5042.21	2.101e-12	42.617	42.617	1	0	17T(79.9663)	127.0633:SMA (N-Succinimidyl-2-morpholine acetate)	0		FALSE	TPK1	sp|P06244|KAPA_YEAST	cAMP-dependent protein kinase type 1
20180918_Lumos_RSLC6_Reiter_Ammerer_MFPL_onbead_Tpk1_1_1.42404.42404.3	FPPFFNEDVKDLLSR		3	6646.12	608.649	559.626	-147.07	-147.068	1675.86	1822.93	3.431e-13	50.775	17.951	1	0		Unknown	0		TRUE	TPK1	sp|P06244|KAPA_YEAST	cAMP-dependent protein kinase type 1
20180918_Lumos_RSLC6_Reiter_Ammerer_MFPL_onbead_Tpk1_1_1.42414.42414.5	NIETPYEPPIQQGQGDTSQFDKYPEEDINYGVQGEDPYADLFR		5	6647.75	993.456	1035.06	208.018	208.019	5170.26	4962.24	1.732e-11	41.87	39.985	1	0		Unknown	0		TRUE	TPK1	sp|P06244|KAPA_YEAST	cAMP-dependent protein kinase type 1
20180918_Lumos_RSLC6_Reiter_Ammerer_MFPL_onbead_Tpk1_1_3.43175.43175.3	YVPDVTYTLCGTPDYIAPEVVSTKPYNK		3	6056.72	1045.19	1174.2	387.041	387.043	3519.58	3132.54	4.482e-09	37.257	37.257	1	0		Unknown	0		FALSE	TPK3	sp|P05986|KAPC_YEAST	cAMP-dependent protein kinase type 3	sp|P06244|KAPA_YEAST
20180918_Lumos_RSLC6_Reiter_Ammerer_MFPL_onbead_Tpk1_1_1.42430.42430.5	NIETPYEPPIQQGQGDTSQFDKYPEEDINYGVQGEDPYADLFR	NIETPYEPPIQQGQGDT[181]S[167]QFDKYPEEDINYGVQGEDPYADLFR	5	6650.3	1025.44	1037.85	62.0478	62.0498	5184.22	5122.17	1.177e-07	29.899	29.899	1	0	17T(79.9663), 18S(79.9663)	Unknown	0		FALSE	TPK1	sp|P06244|KAPA_YEAST	cAMP-dependent protein kinase type 1
20180918_Lumos_RSLC6_Reiter_Ammerer_MFPL_onbead_Tpk1_1_1.42433.42433.2	YPEEDINYGVQGEDPYADLFR		2	6650.76	1245.56	1153.53	-184.062	-184.06	2305.04	2489.1	0.0001773	17.421	13.624	0.9998	0		Unknown	0		TRUE	TPK1	sp|P06244|KAPA_YEAST	cAMP-dependent protein kinase type 1
20180918_Lumos_RSLC6_Reiter_Ammerer_MFPL_onbead_Tpk1_1_1.42445.42445.2	FPPFFNEDVKDLLSR		2	6652.57	912.47	790.91	-243.121	-243.119	1579.8	1822.93	1.925e-07	30.49	16.092	1	0		Unknown	0		TRUE	TPK1	sp|P06244|KAPA_YEAST	cAMP-dependent protein kinase type 1
20180918_Lumos_RSLC6_Reiter_Ammerer_MFPL_onbead_Tpk1_1_1.42453.42453.3	FPPFFNEDVKDLLSR		3	6653.74	608.649	608.648	-0.0024	-0.0004	1822.92	1822.93	4.09e-15	60.491	17.525	1	0		Unknown	0		TRUE	TPK1	sp|P06244|KAPA_YEAST	cAMP-dependent protein kinase type 1
20180918_Lumos_RSLC6_Reiter_Ammerer_MFPL_onbead_Tpk1_1_1.42456.42456.5	NIETPYEPPIQQGQGDTSQFDKYPEEDINYGVQGEDPYADLFR		5	6654.35	993.456	1038.05	222.988	222.99	5185.23	4962.24	2.837e-10	31.894	31.894	1	0		Unknown	0		TRUE	TPK1	sp|P06244|KAPA_YEAST	cAMP-dependent protein kinase type 1
20180918_Lumos_RSLC6_Reiter_Ammerer_MFPL_onbead_Tpk1_1_1.42470.42470.5	NIETPYEPPIQQGQGDTSQFDKYPEEDINYGVQGEDPYADLFR		5	6656.48	993.456	1035.06	208.015	208.017	5170.26	4962.24	9.549e-10	38.494	36.491	1	0		Unknown	0		TRUE	TPK1	sp|P06244|KAPA_YEAST	cAMP-dependent protein kinase type 1
20180918_Lumos_RSLC6_Reiter_Ammerer_MFPL_onbead_Tpk1_1_1.42488.42488.2	YPEEDINYGVQGEDPYADLFR		2	6659.35	1245.56	1245.56	0.0002	0.0022	2489.1	2489.1	1e-15	60.746	39.192	1	0		Unknown	0		TRUE	TPK1	sp|P06244|KAPA_YEAST	cAMP-dependent protein kinase type 1
20180918_Lumos_RSLC6_Reiter_Ammerer_MFPL_onbead_Tpk1_1_1.42500.42500.5	NIETPYEPPIQQGQGDTSQFDKYPEEDINYGVQGEDPYADLFR		5	6661.3	993.456	1030.66	186.045	186.047	5148.29	4962.24	6.249e-11	43.749	43.749	1	0		Unknown	0		TRUE	TPK1	sp|P06244|KAPA_YEAST	cAMP-dependent protein kinase type 1
20180918_Lumos_RSLC6_Reiter_Ammerer_MFPL_onbead_Tpk1_1_1.42507.42507.2	ITDFGFAK		2	6662.38	449.737	449.736	-0.0012	0.0008	897.458	897.46	0.002108	16.981	13.911	0.9999	0		Unknown	0		FALSE	TPK3	sp|P05986|KAPC_YEAST	cAMP-dependent protein kinase type 3	sp|P06245|KAPB_YEAST, sp|P06244|KAPA_YEAST
20180918_Lumos_RSLC6_Reiter_Ammerer_MFPL_onbead_Tpk1_1_1.42512.42512.3	YPEEDINYGVQGEDPYADLFR		3	6663.09	830.708	831.041	1.0002	1.0022	2490.1	2489.1	5.093e-11	42.962	32.76	1	0		0.9970:Label:15N(1) (15N(1))	0		TRUE	TPK1	sp|P06244|KAPA_YEAST	cAMP-dependent protein kinase type 1
20180918_Lumos_RSLC6_Reiter_Ammerer_MFPL_onbead_Tpk1_1_1.42528.42528.2	FPPFFNEDVKDLLSR		2	6665.65	912.47	912.469	-0.0021	-0.0001	1822.92	1822.93	1.498e-13	42.969	13.585	1	0		Unknown	0		TRUE	TPK1	sp|P06244|KAPA_YEAST	cAMP-dependent protein kinase type 1
20180918_Lumos_RSLC6_Reiter_Ammerer_MFPL_onbead_Tpk1_1_1.42557.42557.4	NIETPYEPPIQQGQGDTSQFDKYPEEDINYGVQGEDPYADLFR		4	6670.43	1241.57	1287.83	185.037	185.04	5147.28	4962.24	3.092e-13	44.645	42.812	1	0		Unknown	0		TRUE	TPK1	sp|P06244|KAPA_YEAST	cAMP-dependent protein kinase type 1
20180918_Lumos_RSLC6_Reiter_Ammerer_MFPL_onbead_Tpk1_4_1.38843.38843.3	YVPDVTYTLCGTPDYIAPEVVSTKPYNK		3	6054.91	1045.19	1174.2	387.041	387.043	3519.58	3132.54	2.571e-10	39.953	39.953	1	0		Unknown	0		FALSE	TPK3	sp|P05986|KAPC_YEAST	cAMP-dependent protein kinase type 3	sp|P06244|KAPA_YEAST
20180918_Lumos_RSLC6_Reiter_Ammerer_MFPL_onbead_Tpk1_1_1.42600.42600.3	YPEEDINYGVQGEDPYADLFR		3	6677.26	830.708	838.369	22.9824	22.9844	2512.08	2489.1	0.007178	22.594	21.267	0.9693	0		Unknown	0		TRUE	TPK1	sp|P06244|KAPA_YEAST	cAMP-dependent protein kinase type 1
20180918_Lumos_RSLC6_Reiter_Ammerer_MFPL_onbead_Tpk1_1_1.42611.42611.3	FPPFFNEDVKDLLSR		3	6679.03	608.649	559.626	-147.07	-147.068	1675.86	1822.93	1.681e-12	50.789	19.541	1	0		Unknown	0		TRUE	TPK1	sp|P06244|KAPA_YEAST	cAMP-dependent protein kinase type 1
20180918_Lumos_RSLC6_Reiter_Ammerer_MFPL_onbead_Tpk1_1_1.42645.42645.3	VTSGKYSLQDFQILR		3	6684.4	585.653	641.347	167.083	167.085	1921.02	1753.94	0.0008256	26.827	24.396	0.9422	0		Unknown	0		TRUE	TPK1	sp|P06244|KAPA_YEAST	cAMP-dependent protein kinase type 1
20180918_Lumos_RSLC6_Reiter_Ammerer_MFPL_onbead_Tpk1_1_1.42660.42660.3	FPPFFNEDVKDLLSR		3	6686.57	608.649	608.648	-0.0027	-0.0007	1822.92	1822.93	1.242e-15	60.483	17.421	1	0		Unknown	0		TRUE	TPK1	sp|P06244|KAPA_YEAST	cAMP-dependent protein kinase type 1
20180918_Lumos_RSLC6_Reiter_Ammerer_MFPL_onbead_Tpk1_1_1.39787.39787.3	YVPDVTYTLCGTPDYIAPEVVSTKPYNK		3	6238.62	1045.19	1174.2	387.041	387.043	3519.58	3132.54	5.829e-07	30.612	30.612	0.996	0		Unknown	0		FALSE	TPK3	sp|P05986|KAPC_YEAST	cAMP-dependent protein kinase type 3	sp|P06244|KAPA_YEAST
20180918_Lumos_RSLC6_Reiter_Ammerer_MFPL_onbead_Tpk1_1_1.42693.42693.2	YPEEDINYGVQGEDPYADLFR		2	6691.56	1245.56	1246.06	1.0017	1.0037	2490.1	2489.1	1e-15	58.365	39.157	1	0		0.9970:Label:15N(1) (15N(1))	0		TRUE	TPK1	sp|P06244|KAPA_YEAST	cAMP-dependent protein kinase type 1
20180918_Lumos_RSLC6_Reiter_Ammerer_MFPL_onbead_Tpk1_1_1.42699.42699.3	YPEEDINYGVQGEDPYADLFR		3	6692.55	830.708	838.369	22.9829	22.9849	2512.08	2489.1	0.001064	23.334	19.353	0.9935	0		Unknown	0		TRUE	TPK1	sp|P06244|KAPA_YEAST	cAMP-dependent protein kinase type 1
20180918_Lumos_RSLC6_Reiter_Ammerer_MFPL_onbead_Tpk1_1_1.42703.42703.4	NIETPYEPPIQQGQGDTSQFDKYPEEDINYGVQGEDPYADLFR		4	6693.16	1241.57	1288.33	187.038	187.04	5149.28	4962.24	2.439e-11	43.129	43.129	1	0		Unknown	0		TRUE	TPK1	sp|P06244|KAPA_YEAST	cAMP-dependent protein kinase type 1
20180918_Lumos_RSLC6_Reiter_Ammerer_MFPL_onbead_Tpk1_1_2.42783.42783.3	YVPDVTYTLCGTPDYIAPEVVSTKPYNK		3	6071.69	1045.19	1174.2	387.04	387.042	3519.58	3132.54	4.511e-10	39.009	39.009	1	0		Unknown	0		FALSE	TPK3	sp|P05986|KAPC_YEAST	cAMP-dependent protein kinase type 3	sp|P06244|KAPA_YEAST
20180918_Lumos_RSLC6_Reiter_Ammerer_MFPL_onbead_Tpk1_1_1.42728.42728.3	YPEEDINYGVQGEDPYADLFR		3	6697.14	830.708	831.042	1.0007	1.0027	2490.1	2489.1	5.472e-13	47.766	35.245	1	0		0.9970:Label:15N(1) (15N(1))	0		TRUE	TPK1	sp|P06244|KAPA_YEAST	cAMP-dependent protein kinase type 1
20180918_Lumos_RSLC6_Reiter_Ammerer_MFPL_onbead_Tpk1_1_1.42738.42738.2	FPPFFNEDVK		2	6698.69	620.306	620.305	-0.0014	0.0006	1238.6	1238.6	1.271e-05	21.891	12.743	1	0		Unknown	0		TRUE	TPK1	sp|P06244|KAPA_YEAST	cAMP-dependent protein kinase type 1
20180918_Lumos_RSLC6_Reiter_Ammerer_MFPL_onbead_Tpk1_1_1.42741.42741.2	FPPFFNEDVKDLLSR		2	6699.08	912.47	912.971	1.0013	1.0033	1823.93	1822.93	1.368e-11	38.639	15.567	1	0		0.9970:Label:15N(1) (15N(1))	0		TRUE	TPK1	sp|P06244|KAPA_YEAST	cAMP-dependent protein kinase type 1
20180918_Lumos_RSLC6_Reiter_Ammerer_MFPL_onbead_Tpk1_1_1.42754.42754.2	YSLQDFQILR		2	6701.23	641.843	642.343	0.9999	1.0019	1282.67	1281.67	0.0006478	18.556	18.144	1	0		0.9970:Label:15N(1) (15N(1))	0		TRUE	TPK1	sp|P06244|KAPA_YEAST	cAMP-dependent protein kinase type 1
20180918_Lumos_RSLC6_Reiter_Ammerer_MFPL_onbead_Tpk1_1_1.42802.42802.4	NIETPYEPPIQQGQGDTSQFDKYPEEDINYGVQGEDPYADLFR		4	6708.82	1241.57	1288.08	186.048	186.05	5148.29	4962.24	8.021e-11	39.5	37.657	1	0		Unknown	0		TRUE	TPK1	sp|P06244|KAPA_YEAST	cAMP-dependent protein kinase type 1
20180918_Lumos_RSLC6_Reiter_Ammerer_MFPL_onbead_Tpk1_1_1.42844.42844.3	FPPFFNEDVKDLLSR		3	6715.46	608.649	560.638	-144.033	-144.031	1678.89	1822.93	9.169e-07	33.62	17.462	0.9578	0		Unknown	0		TRUE	TPK1	sp|P06244|KAPA_YEAST	cAMP-dependent protein kinase type 1
20180918_Lumos_RSLC6_Reiter_Ammerer_MFPL_onbead_Tpk1_1_1.42852.42852.3	FPPFFNEDVKDLLSR		3	6716.7	608.649	559.625	-147.071	-147.069	1675.85	1822.93	6.687e-14	50.706	17.841	1	0		Unknown	0		TRUE	TPK1	sp|P06244|KAPA_YEAST	cAMP-dependent protein kinase type 1
20180918_Lumos_RSLC6_Reiter_Ammerer_MFPL_onbead_Tpk1_1_1.42860.42860.3	FPPFFNEDVKDLLSR		3	6717.94	608.649	527.282	-244.102	-244.1	1578.82	1822.93	2.048e-08	44.682	20.425	1	0		Unknown	0		TRUE	TPK1	sp|P06244|KAPA_YEAST	cAMP-dependent protein kinase type 1
20180918_Lumos_RSLC6_Reiter_Ammerer_MFPL_onbead_Tpk1_1_1.42873.42873.3	FPPFFNEDVKDLLSR		3	6719.93	608.649	608.982	1.0003	1.0023	1823.93	1822.93	4.806e-15	58.667	17.702	1	0		0.9970:Label:15N(1) (15N(1))	0		TRUE	TPK1	sp|P06244|KAPA_YEAST	cAMP-dependent protein kinase type 1
20180918_Lumos_RSLC6_Reiter_Ammerer_MFPL_onbead_Tpk1_1_1.42884.42884.4	NIETPYEPPIQQGQGDTSQFDKYPEEDINYGVQGEDPYADLFR		4	6721.75	1241.57	1287.83	185.04	185.042	5147.28	4962.24	2.707e-11	40.065	40.065	1	0		Unknown	0		TRUE	TPK1	sp|P06244|KAPA_YEAST	cAMP-dependent protein kinase type 1
20180918_Lumos_RSLC6_Reiter_Ammerer_MFPL_onbead_Tpk1_1_1.38415.38415.3	YVPDVTYTLCGTPDYIAPEVVSTKPYNK		3	6027.63	1045.19	1174.2	387.039	387.041	3519.58	3132.54	2.194e-09	37.143	37.143	1	0		Unknown	0		FALSE	TPK3	sp|P05986|KAPC_YEAST	cAMP-dependent protein kinase type 3	sp|P06244|KAPA_YEAST
20180918_Lumos_RSLC6_Reiter_Ammerer_MFPL_onbead_Tpk1_1_1.42952.42952.2	FPPFFNEDVKDLLSR		2	6732.34	912.47	912.469	-0.002	0	1822.92	1822.93	6.688e-13	40.373	13.673	1	0		Unknown	0		TRUE	TPK1	sp|P06244|KAPA_YEAST	cAMP-dependent protein kinase type 1
20180918_Lumos_RSLC6_Reiter_Ammerer_MFPL_onbead_Tpk1_1_1.42982.42982.2	FPPFFNEDVK		2	6737.14	620.306	620.808	1.0035	1.0055	1239.6	1238.6	2.565	14.901	13.931	0.9468	0		0.9970:Label:15N(1) (15N(1))	0		TRUE	TPK1	sp|P06244|KAPA_YEAST	cAMP-dependent protein kinase type 1
20180918_Lumos_RSLC6_Reiter_Ammerer_MFPL_onbead_Tpk1_1_1.43020.43020.4	NIETPYEPPIQQGQGDTSQFDKYPEEDINYGVQGEDPYADLFR		4	6743.23	1241.57	1185.29	-225.119	-225.117	4737.12	4962.24	1.929e-10	44.323	42.959	1	0		Unknown	0		TRUE	TPK1	sp|P06244|KAPA_YEAST	cAMP-dependent protein kinase type 1
20180918_Lumos_RSLC6_Reiter_Ammerer_MFPL_onbead_Tpk1_1_1.43035.43035.2	YSLQDFQILR		2	6745.63	641.843	641.843	-0.0011	0.0009	1281.67	1281.67	0.0172	22.098	21.566	0.9993	0		Unknown	0		TRUE	TPK1	sp|P06244|KAPA_YEAST	cAMP-dependent protein kinase type 1
20180918_Lumos_RSLC6_Reiter_Ammerer_MFPL_onbead_Tpk1_1_2.42808.42808.4	YVPDVTYTLCGTPDYIAPEVVSTKPYNK		4	6075	784.141	880.901	387.039	387.041	3519.58	3132.54	2.225e-10	48.294	48.294	1	0		Unknown	0		FALSE	TPK3	sp|P05986|KAPC_YEAST	cAMP-dependent protein kinase type 3	sp|P06244|KAPA_YEAST
20180918_Lumos_RSLC6_Reiter_Ammerer_MFPL_onbead_Tpk1_1_1.43076.43076.2	YPEEDINYGVQGEDPYADLFR		2	6752.11	1245.56	1250.07	9.0202	9.0222	2498.12	2489.1	0.001296	18.445	13.928	0.9869	0		9.0302:Label:13C(9) (13C(9) Silac label)	0		TRUE	TPK1	sp|P06244|KAPA_YEAST	cAMP-dependent protein kinase type 1
20180918_Lumos_RSLC6_Reiter_Ammerer_MFPL_onbead_Tpk1_1_1.43080.43080.3	FPPFFNEDVKDLLSR		3	6752.67	608.649	608.982	1.0003	1.0023	1823.93	1822.93	1.22e-15	60.62	17.802	1	0		0.9970:Label:15N(1) (15N(1))	0		TRUE	TPK1	sp|P06244|KAPA_YEAST	cAMP-dependent protein kinase type 1
20180918_Lumos_RSLC6_Reiter_Ammerer_MFPL_onbead_Tpk1_1_1.43092.43092.3	FPPFFNEDVKDLLSR		3	6754.65	608.649	559.96	-146.068	-146.066	1676.86	1822.93	5.279e-14	49.934	19.146	1	0		Unknown	0		TRUE	TPK1	sp|P06244|KAPA_YEAST	cAMP-dependent protein kinase type 1
20180918_Lumos_RSLC6_Reiter_Ammerer_MFPL_onbead_Tpk1_1_1.43132.43132.2	ITDFGFAK		2	6761.05	449.737	449.737	-0.0007	0.0013	897.459	897.46	0.003385	17.362	12.618	0.9999	0		Unknown	0		FALSE	TPK3	sp|P05986|KAPC_YEAST	cAMP-dependent protein kinase type 3	sp|P06245|KAPB_YEAST, sp|P06244|KAPA_YEAST
20180918_Lumos_RSLC6_Reiter_Ammerer_MFPL_onbead_Tpk1_1_1.43156.43156.2	FPPFFNEDVKDLLSR		2	6764.88	912.47	912.97	0.9999	1.0019	1823.93	1822.93	4.212e-12	40.592	14.12	1	0		0.9970:Label:15N(1) (15N(1))	0		TRUE	TPK1	sp|P06244|KAPA_YEAST	cAMP-dependent protein kinase type 1
20180918_Lumos_RSLC6_Reiter_Ammerer_MFPL_onbead_Tpk1_1_1.43215.43215.4	NIETPYEPPIQQGQGDTSQFDKYPEEDINYGVQGEDPYADLFR	NIETPYEPPIQQGQGDT[181]SQFDKY[243]PEEDINY[243]GVQGEDPYADLFR	4	6774.2	1301.54	1250.07	-205.887	-205.885	4996.25	5202.14	5.657e-10	37.225	37.225	1	0	17T(79.9663), 23Y(79.9663), 30Y(79.9663)	Unknown	0		FALSE	TPK1	sp|P06244|KAPA_YEAST	cAMP-dependent protein kinase type 1
20180918_Lumos_RSLC6_Reiter_Ammerer_MFPL_onbead_Tpk1_1_1.43216.43216.2	FPPFFNEDVK		2	6774.36	620.306	620.305	-0.0011	0.0009	1238.6	1238.6	0.0002717	18.588	11.977	1	0		Unknown	0		TRUE	TPK1	sp|P06244|KAPA_YEAST	cAMP-dependent protein kinase type 1
20180918_Lumos_RSLC6_Reiter_Ammerer_MFPL_onbead_Tpk1_1_1.43229.43229.2	YPEEDINYGVQGEDPYADLFR		2	6776.41	1245.56	1249.31	7.5068	7.5088	2496.61	2489.1	1.284e-05	24.961	20.646	1	0		Unknown	0		TRUE	TPK1	sp|P06244|KAPA_YEAST	cAMP-dependent protein kinase type 1
20180918_Lumos_RSLC6_Reiter_Ammerer_MFPL_onbead_Tpk1_1_1.43239.43239.4	NIETPYEPPIQQGQGDTSQFDKYPEEDINYGVQGEDPYADLFR	NIETPYEPPIQQGQGDT[181]SQFDKYPEEDINYGVQGEDPYADLFR	4	6778.02	1261.56	1250.32	-44.9561	-44.9541	4997.25	5042.21	7.869e-09	35.47	35.47	1	0	17T(79.9663)	Unknown	0		FALSE	TPK1	sp|P06244|KAPA_YEAST	cAMP-dependent protein kinase type 1
20180918_Lumos_RSLC6_Reiter_Ammerer_MFPL_onbead_Tpk1_1_1.43246.43246.2	YPEEDINYGVQGEDPYADLFR		2	6779.1	1245.56	1254.06	17.0088	17.0108	2506.11	2489.1	3.201e-05	20.483	16.156	1	0		Unknown	0		TRUE	TPK1	sp|P06244|KAPA_YEAST	cAMP-dependent protein kinase type 1
20180918_Lumos_RSLC6_Reiter_Ammerer_MFPL_onbead_Tpk1_1_1.43287.43287.3	FPPFFNEDVKDLLSR		3	6785.55	608.649	608.648	-0.0022	-0.0002	1822.92	1822.93	2.859e-15	60.473	17.362	1	0		Unknown	0		TRUE	TPK1	sp|P06244|KAPA_YEAST	cAMP-dependent protein kinase type 1
20180918_Lumos_RSLC6_Reiter_Ammerer_MFPL_onbead_Tpk1_1_1.43289.43289.3	FPPFFNEDVKDLLSR		3	6785.95	608.649	527.942	-242.121	-242.119	1580.8	1822.93	9.703e-09	28.336	14.211	1	0		Unknown	0		TRUE	TPK1	sp|P06244|KAPA_YEAST	cAMP-dependent protein kinase type 1
20180918_Lumos_RSLC6_Reiter_Ammerer_MFPL_onbead_Tpk1_1_1.43294.43294.2	VTSGKYSLQDFQILR		2	6786.72	877.976	705.292	-345.367	-345.365	1408.57	1753.94	0.004456	20.95	20.95	0.6	0		Unknown	0		TRUE	TPK1	sp|P06244|KAPA_YEAST	cAMP-dependent protein kinase type 1
20180918_Lumos_RSLC6_Reiter_Ammerer_MFPL_onbead_Tpk1_1_1.43314.43314.4	NIETPYEPPIQQGQGDTSQFDKYPEEDINYGVQGEDPYADLFR		4	6789.94	1241.57	1246.32	19.0043	19.0063	4981.25	4962.24	7.384e-14	47.083	45.083	1	0		19.0098:Gln->Phe (Gln->Phe substitution), 19.0137:Label:2H(3)+Oxidation (Oxidised 2H(3) labelled Methionine)	0		TRUE	TPK1	sp|P06244|KAPA_YEAST	cAMP-dependent protein kinase type 1
20180918_Lumos_RSLC6_Reiter_Ammerer_MFPL_onbead_Tpk1_1_1.43320.43320.2	FPPFFNEDVKDLLSR		2	6790.91	912.47	912.971	1.0016	1.0036	1823.93	1822.93	8.03e-11	36.658	13.768	1	0		0.9970:Label:15N(1) (15N(1))	0		TRUE	TPK1	sp|P06244|KAPA_YEAST	cAMP-dependent protein kinase type 1
20180918_Lumos_RSLC6_Reiter_Ammerer_MFPL_onbead_Tpk1_1_1.43401.43401.4	NIETPYEPPIQQGQGDTSQFDKYPEEDINYGVQGEDPYADLFR		4	6803.62	1241.57	1246.07	17.9985	18.0005	4980.24	4962.24	9.717e-15	43.642	41.635	1	0		17.9906:Fluoro (fluorination)	0		TRUE	TPK1	sp|P06244|KAPA_YEAST	cAMP-dependent protein kinase type 1
20180918_Lumos_RSLC6_Reiter_Ammerer_MFPL_onbead_Tpk1_1_1.43413.43413.2	FPPFFNEDVKDLLSR		2	6805.52	912.47	912.97	1.0008	1.0028	1823.93	1822.93	2.035e-11	38.71	13.806	1	0		0.9970:Label:15N(1) (15N(1))	0		TRUE	TPK1	sp|P06244|KAPA_YEAST	cAMP-dependent protein kinase type 1
20180918_Lumos_RSLC6_Reiter_Ammerer_MFPL_onbead_Tpk1_1_1.43431.43431.4	NIETPYEPPIQQGQGDTSQFDKYPEEDINYGVQGEDPYADLFR		4	6808.38	1241.57	1245.82	16.9965	16.9985	4979.24	4962.24	9.563e-12	34.199	34.199	1	0		16.9976:Asn->Met (Asn->Met substitution), 16.9902:Pro->Asn (Pro->Asn substitution)	0		TRUE	TPK1	sp|P06244|KAPA_YEAST	cAMP-dependent protein kinase type 1
20180918_Lumos_RSLC6_Reiter_Ammerer_MFPL_onbead_Tpk1_1_1.43443.43443.4	NIETPYEPPIQQGQGDTSQFDKYPEEDINYGVQGEDPYADLFR		4	6810.28	1241.57	1250.07	34.0112	34.0132	4996.25	4962.24	1.208e-14	47.548	47.548	1	0		34.0207:Glu->Tyr (Glu->Tyr substitution)	0		TRUE	TPK1	sp|P06244|KAPA_YEAST	cAMP-dependent protein kinase type 1
20180918_Lumos_RSLC6_Reiter_Ammerer_MFPL_onbead_Tpk1_1_1.43482.43482.4	NIETPYEPPIQQGQGDTSQFDKYPEEDINYGVQGEDPYADLFR		4	6816.49	1241.57	1250.31	34.9882	34.9902	4997.23	4962.24	8.543e-13	47.508	45.655	1	0		Unknown	0		TRUE	TPK1	sp|P06244|KAPA_YEAST	cAMP-dependent protein kinase type 1
20180918_Lumos_RSLC6_Reiter_Ammerer_MFPL_onbead_Tpk1_1_1.43491.43491.3	FPPFFNEDVKDLLSR		3	6817.84	608.649	608.982	1.0005	1.0025	1823.93	1822.93	3.28e-13	55.6	17.786	1	0		0.9970:Label:15N(1) (15N(1))	0		TRUE	TPK1	sp|P06244|KAPA_YEAST	cAMP-dependent protein kinase type 1
20180918_Lumos_RSLC6_Reiter_Ammerer_MFPL_onbead_Tpk1_1_1.43520.43520.4	NIETPYEPPIQQGQGDTSQFDKYPEEDINYGVQGEDPYADLFR		4	6822.55	1241.57	1246.32	19.0039	19.0059	4981.25	4962.24	5.595e-11	49.483	47.478	1	0		19.0137:Label:2H(3)+Oxidation (Oxidised 2H(3) labelled Methionine), 19.0098:Gln->Phe (Gln->Phe substitution)	0		TRUE	TPK1	sp|P06244|KAPA_YEAST	cAMP-dependent protein kinase type 1
20180918_Lumos_RSLC6_Reiter_Ammerer_MFPL_onbead_Tpk1_1_1.43537.43537.2	VTSGKYSLQDFQILR		2	6825.24	877.976	641.341	-473.269	-473.267	1280.67	1753.94	0.09365	18.306	18.165	0.4263	0		Unknown	0		TRUE	TPK1	sp|P06244|KAPA_YEAST	cAMP-dependent protein kinase type 1
20180918_Lumos_RSLC6_Reiter_Ammerer_MFPL_onbead_Tpk1_1_1.43543.43543.2	FPPFFNEDVK		2	6826.16	620.306	620.305	-0.0012	0.0008	1238.6	1238.6	4.102e-05	21.503	13.803	1	0		Unknown	0		TRUE	TPK1	sp|P06244|KAPA_YEAST	cAMP-dependent protein kinase type 1
20180918_Lumos_RSLC6_Reiter_Ammerer_MFPL_onbead_Tpk1_1_1.43590.43590.4	NIETPYEPPIQQGQGDTSQFDKYPEEDINYGVQGEDPYADLFR	NIETPYEPPIQQGQGDT[181]SQFDKYPEEDINYGVQGEDPYADLFR	4	6833.6	1261.56	1250.32	-44.9527	-44.9507	4997.25	5042.21	8.697e-12	37.688	35.966	1	0	17T(79.9663)	Unknown	0		FALSE	TPK1	sp|P06244|KAPA_YEAST	cAMP-dependent protein kinase type 1
20180918_Lumos_RSLC6_Reiter_Ammerer_MFPL_onbead_Tpk1_1_1.43605.43605.2	YPEEDINYGVQGEDPYADLFR		2	6835.92	1245.56	1256.07	21.0254	21.0274	2510.13	2489.1	7.101e-11	35.573	32.909	1	0		Unknown	0		TRUE	TPK1	sp|P06244|KAPA_YEAST	cAMP-dependent protein kinase type 1
20180918_Lumos_RSLC6_Reiter_Ammerer_MFPL_onbead_Tpk1_3_2.47614.47614.4	FYAAEVCLALEYLHSK		4	6886.33	464.987	541.504	306.07	306.072	2161.99	1855.92	1.547e-06	38.63	33.494	1	0		Unknown	0		FALSE	TPK3	sp|P05986|KAPC_YEAST	cAMP-dependent protein kinase type 3	sp|P06244|KAPA_YEAST
20180918_Lumos_RSLC6_Reiter_Ammerer_MFPL_onbead_Tpk1_2_1.45858.45858.3	FYAAEVCLALEYLHSK		3	6821.74	619.647	721.67	306.07	306.072	2161.99	1855.92	0.07136	21.193	20.038	0.9386	0		Unknown	0		FALSE	TPK3	sp|P05986|KAPC_YEAST	cAMP-dependent protein kinase type 3	sp|P06244|KAPA_YEAST
20180918_Lumos_RSLC6_Reiter_Ammerer_MFPL_onbead_Tpk1_1_1.43619.43619.4	NIETPYEPPIQQGQGDTSQFDKYPEEDINYGVQGEDPYADLFR		4	6838.16	1241.57	1250.32	35.0126	35.0146	4997.25	4962.24	1.242e-12	35.179	35.179	1	0		35.0048:Gln->Tyr (Gln->Tyr substitution)	0		TRUE	TPK1	sp|P06244|KAPA_YEAST	cAMP-dependent protein kinase type 1
20180918_Lumos_RSLC6_Reiter_Ammerer_MFPL_onbead_Tpk1_1_1.43628.43628.2	FPPFFNEDVKDLLSR		2	6839.61	912.47	912.97	1.0008	1.0028	1823.93	1822.93	8.676e-12	38.753	13.606	1	0		0.9970:Label:15N(1) (15N(1))	0		TRUE	TPK1	sp|P06244|KAPA_YEAST	cAMP-dependent protein kinase type 1
20180918_Lumos_RSLC6_Reiter_Ammerer_MFPL_onbead_Tpk1_1_1.43633.43633.2	VTSGKYSLQDFQILR		2	6840.39	877.976	641.842	-472.266	-472.264	1281.67	1753.94	0.0005155	22.124	21.573	0.9313	0		Unknown	0		TRUE	TPK1	sp|P06244|KAPA_YEAST	cAMP-dependent protein kinase type 1
20180918_Lumos_RSLC6_Reiter_Ammerer_MFPL_onbead_Tpk1_1_1.43638.43638.2	ITDFGFAK		2	6841.16	449.737	449.737	-0.0009	0.0011	897.459	897.46	0.01364	16.23	12.137	0.9995	0		Unknown	0		FALSE	TPK3	sp|P05986|KAPC_YEAST	cAMP-dependent protein kinase type 3	sp|P06244|KAPA_YEAST, sp|P06245|KAPB_YEAST
20180918_Lumos_RSLC6_Reiter_Ammerer_MFPL_onbead_Tpk1_1_1.43705.43705.3	FPPFFNEDVKDLLSR		3	6851.72	608.649	608.982	1	1.002	1823.93	1822.93	7.237e-15	60.618	18.36	1	0		0.9970:Label:15N(1) (15N(1))	0		TRUE	TPK1	sp|P06244|KAPA_YEAST	cAMP-dependent protein kinase type 1
20180918_Lumos_RSLC6_Reiter_Ammerer_MFPL_onbead_Tpk1_1_1.43741.43741.4	NIETPYEPPIQQGQGDTSQFDKYPEEDINYGVQGEDPYADLFR		4	6857.48	1241.57	1250.07	33.9921	33.9941	4996.23	4962.24	2.022e-11	46.085	46.085	1	0		33.9877:Pro->Met (Pro->Met substitution), 33.9843:Xle->Phe (Leu/Ile->Phe substitution)	0		TRUE	TPK1	sp|P06244|KAPA_YEAST	cAMP-dependent protein kinase type 1
20180918_Lumos_RSLC6_Reiter_Ammerer_MFPL_onbead_Tpk1_1_1.43754.43754.4	NIETPYEPPIQQGQGDTSQFDKYPEEDINYGVQGEDPYADLFR		4	6859.57	1241.57	1242.07	2.0068	2.0088	4964.25	4962.24	1e-15	56.553	50.17	1	0		2.0042:Label:18O(1) (O18 Labeling), 2.0156:Pro->Val (Pro->Val substitution)	0		TRUE	TPK1	sp|P06244|KAPA_YEAST	cAMP-dependent protein kinase type 1
20180918_Lumos_RSLC6_Reiter_Ammerer_MFPL_onbead_Tpk1_1_1.43786.43786.4	NIETPYEPPIQQGQGDTSQFDKYPEEDINYGVQGEDPYADLFR		4	6864.57	1241.57	1213.81	-111.033	-111.031	4851.21	4962.24	1.062e-10	45.914	43.077	1	0		Unknown	0		TRUE	TPK1	sp|P06244|KAPA_YEAST	cAMP-dependent protein kinase type 1
20180918_Lumos_RSLC6_Reiter_Ammerer_MFPL_onbead_Tpk1_1_1.43807.43807.3	YPEEDINYGVQGEDPYADLFR	YPEEDINY[243]GVQGEDPYADLFR	3	6867.85	857.363	1000.8	430.317	430.319	2999.39	2569.07	0.0001469	29.526	25.404	0.9979	0	8Y(79.9663)	Unknown	0		FALSE	TPK1	sp|P06244|KAPA_YEAST	cAMP-dependent protein kinase type 1
20180918_Lumos_RSLC6_Reiter_Ammerer_MFPL_onbead_Tpk1_1_1.43830.43830.5	NIETPYEPPIQQGQGDTSQFDKYPEEDINYGVQGEDPYADLFR		5	6871.4	993.456	1001.65	40.955	40.957	5003.2	4962.24	3.725e-07	32.105	32.105	1	0		Unknown	0		TRUE	TPK1	sp|P06244|KAPA_YEAST	cAMP-dependent protein kinase type 1
20180918_Lumos_RSLC6_Reiter_Ammerer_MFPL_onbead_Tpk1_1_1.43841.43841.4	NIETPYEPPIQQGQGDTSQFDKYPEEDINYGVQGEDPYADLFR		4	6873.16	1241.57	1256.32	59.0205	59.0225	5021.26	4962.24	1e-15	54.304	51.459	1	0		59.0194:AEC-MAEC (aminoethylcysteine)	0		TRUE	TPK1	sp|P06244|KAPA_YEAST	cAMP-dependent protein kinase type 1
20180918_Lumos_RSLC6_Reiter_Ammerer_MFPL_onbead_Tpk1_1_1.43843.43843.4	NIETPYEPPIQQGQGDTSQFDKYPEEDINYGVQGEDPYADLFR	NIETPYEPPIQQGQGDT[181]SQFDKYPEEDINYGVQGEDPYADLFR	4	6873.47	1261.56	1251.81	-39.0098	-39.0078	5003.2	5042.21	9.01e-12	42.739	39.999	1	0	17T(79.9663)	-39.0109:Trp->Phe (Trp->Phe substitution)	0		FALSE	TPK1	sp|P06244|KAPA_YEAST	cAMP-dependent protein kinase type 1
20180918_Lumos_RSLC6_Reiter_Ammerer_MFPL_onbead_Tpk1_1_1.43865.43865.4	NIETPYEPPIQQGQGDTSQFDKYPEEDINYGVQGEDPYADLFR		4	6876.98	1241.57	1247.81	24.9892	24.9912	4987.23	4962.24	2.637e-11	46.67	44.65	1	0		24.9952:Cyano (cyano)	0		TRUE	TPK1	sp|P06244|KAPA_YEAST	cAMP-dependent protein kinase type 1
20180918_Lumos_RSLC6_Reiter_Ammerer_MFPL_onbead_Tpk1_1_1.43874.43874.4	NIETPYEPPIQQGQGDTSQFDKYPEEDINYGVQGEDPYADLFR		4	6878.36	1241.57	1256.32	59.0175	59.0195	5021.26	4962.24	4.105e-14	49.389	47.409	1	0		59.0194:AEC-MAEC (aminoethylcysteine)	0		TRUE	TPK1	sp|P06244|KAPA_YEAST	cAMP-dependent protein kinase type 1
20180918_Lumos_RSLC6_Reiter_Ammerer_MFPL_onbead_Tpk1_1_1.43900.43900.4	NIETPYEPPIQQGQGDTSQFDKYPEEDINYGVQGEDPYADLFR		4	6882.5	1241.57	1237.82	-15.0103	-15.0083	4947.23	4962.24	2.359e-14	48.989	44.033	1	0		-15.0109:Ser->LacticAcid (lactic acid from N-term Ser), -15.0109:Lys->Xle (Lys->Leu/Ile substitution), -15.0109:ISD_z+2_ion (ISD (z+2)-series), -14.9997:Glu->Asn (Glu->Asn substitution)	0		TRUE	TPK1	sp|P06244|KAPA_YEAST	cAMP-dependent protein kinase type 1
20180918_Lumos_RSLC6_Reiter_Ammerer_MFPL_onbead_Tpk1_1_1.43913.43913.3	FPPFFNEDVKDLLSR		3	6884.56	608.649	608.648	-0.0024	-0.0004	1822.92	1822.93	1.413e-15	60.451	17.369	1	0		Unknown	0		TRUE	TPK1	sp|P06244|KAPA_YEAST	cAMP-dependent protein kinase type 1
20180918_Lumos_RSLC6_Reiter_Ammerer_MFPL_onbead_Tpk1_1_1.43919.43919.4	NIETPYEPPIQQGQGDTSQFDKYPEEDINYGVQGEDPYADLFR		4	6885.48	1241.57	1237.56	-16.0201	-16.0181	4946.22	4962.24	7.328e-14	51.074	45.691	1	0		-16.0279:Phe->Met (Phe->Met substitution), -16.0135:Met->Asp (Met->Asp substitution)	0		TRUE	TPK1	sp|P06244|KAPA_YEAST	cAMP-dependent protein kinase type 1
20180918_Lumos_RSLC6_Reiter_Ammerer_MFPL_onbead_Tpk1_1_1.43920.43920.4	NIETPYEPPIQQGQGDTSQFDKYPEEDINYGVQGEDPYADLFR	NIETPYEPPIQQGQGDT[181]S[167]QFDKYPEEDINYGVQGEDPYADLFR	4	6885.64	1281.55	1258.81	-90.9781	-90.9761	5031.2	5122.17	1.24e-07	34.183	32.471	1	0	17T(79.9663), 18S(79.9663)	Unknown	0		FALSE	TPK1	sp|P06244|KAPA_YEAST	cAMP-dependent protein kinase type 1
20180918_Lumos_RSLC6_Reiter_Ammerer_MFPL_onbead_Tpk1_1_1.43926.43926.5	NIETPYEPPIQQGQGDTSQFDKYPEEDINYGVQGEDPYADLFR		5	6886.49	993.456	1001.45	39.9487	39.9507	5002.19	4962.24	3.445e-11	37.19	37.19	1	0		Unknown	0		TRUE	TPK1	sp|P06244|KAPA_YEAST	cAMP-dependent protein kinase type 1
20180918_Lumos_RSLC6_Reiter_Ammerer_MFPL_onbead_Tpk1_1_1.43933.43933.3	YPEEDINYGVQGEDPYADLFR		3	6887.61	830.708	986.799	468.272	468.274	2957.37	2489.1	3.745e-05	30.968	25.803	0.9991	0		Unknown	0		TRUE	TPK1	sp|P06244|KAPA_YEAST	cAMP-dependent protein kinase type 1
20180918_Lumos_RSLC6_Reiter_Ammerer_MFPL_onbead_Tpk1_1_1.43934.43934.4	NIETPYEPPIQQGQGDTSQFDKYPEEDINYGVQGEDPYADLFR		4	6887.76	1241.57	1231.31	-41.0181	-41.0161	4921.22	4962.24	6.219e-08	29.992	28.313	1	0		Unknown	0		TRUE	TPK1	sp|P06244|KAPA_YEAST	cAMP-dependent protein kinase type 1
20180918_Lumos_RSLC6_Reiter_Ammerer_MFPL_onbead_Tpk1_1_1.43940.43940.4	NIETPYEPPIQQGQGDTSQFDKYPEEDINYGVQGEDPYADLFR	NIETPYEPPIQQGQGDT[181]SQFDKY[243]PEEDINY[243]GVQGEDPYADLFR	4	6888.69	1301.54	1258.56	-171.927	-171.925	5030.21	5202.14	2.5e-09	36.987	36.289	1	0	17T(79.9663), 23Y(79.9663), 30Y(79.9663)	Unknown	0		FALSE	TPK1	sp|P06244|KAPA_YEAST	cAMP-dependent protein kinase type 1
20180918_Lumos_RSLC6_Reiter_Ammerer_MFPL_onbead_Tpk1_1_1.43947.43947.4	NIETPYEPPIQQGQGDTSQFDKYPEEDINYGVQGEDPYADLFR	NIETPYEPPIQQGQGDT[181]S[167]QFDKYPEEDINYGVQGEDPYADLFR	4	6889.83	1281.55	1258.31	-92.9795	-92.9775	5029.19	5122.17	5.288e-12	42.211	42.204	1	0	17T(79.9663), 18S(79.9663)	Unknown	0		FALSE	TPK1	sp|P06244|KAPA_YEAST	cAMP-dependent protein kinase type 1
20180918_Lumos_RSLC6_Reiter_Ammerer_MFPL_onbead_Tpk1_1_1.43971.43971.3	FPPFFNEDVKDLLSR		3	6893.66	608.649	608.982	1.0003	1.0023	1823.93	1822.93	1e-15	60.641	17.903	1	0		0.9970:Label:15N(1) (15N(1))	0		TRUE	TPK1	sp|P06244|KAPA_YEAST	cAMP-dependent protein kinase type 1
20180918_Lumos_RSLC6_Reiter_Ammerer_MFPL_onbead_Tpk1_1_1.43977.43977.5	NIETPYEPPIQQGQGDTSQFDKYPEEDINYGVQGEDPYADLFR		5	6894.63	993.456	1004.24	53.915	53.917	5016.16	4962.24	1.909e-14	49.305	49.305	1	0		53.9193:Cation:Fe[II] (Replacement of 2 protons by iron)	0		TRUE	TPK1	sp|P06244|KAPA_YEAST	cAMP-dependent protein kinase type 1
20180918_Lumos_RSLC6_Reiter_Ammerer_MFPL_onbead_Tpk1_1_1.43978.43978.5	NIETPYEPPIQQGQGDTSQFDKYPEEDINYGVQGEDPYADLFR		5	6894.76	993.456	994.055	2.999	3.001	4965.24	4962.24	3.624e-13	44.125	42.114	1	0		2.9911:Label:15N(3) (15N(3)), 3.0101:Label:13C(3) (13C3 label for SILAC)	0		TRUE	TPK1	sp|P06244|KAPA_YEAST	cAMP-dependent protein kinase type 1
20180918_Lumos_RSLC6_Reiter_Ammerer_MFPL_onbead_Tpk1_1_1.43981.43981.3	YPEEDINYGVQGEDPYADLFR		3	6895.23	830.708	986.8	468.275	468.277	2957.38	2489.1	1.645e-05	29.396	28.298	0.9994	0		Unknown	0		TRUE	TPK1	sp|P06244|KAPA_YEAST	cAMP-dependent protein kinase type 1
20180918_Lumos_RSLC6_Reiter_Ammerer_MFPL_onbead_Tpk1_1_1.43987.43987.2	YPEEDINYGVQGEDPYADLFR		2	6896.15	1245.56	1321.09	151.061	151.064	2640.16	2489.1	0.0272	15.809	12.041	0.8821	0		Unknown	0		TRUE	TPK1	sp|P06244|KAPA_YEAST	cAMP-dependent protein kinase type 1
20180918_Lumos_RSLC6_Reiter_Ammerer_MFPL_onbead_Tpk1_1_1.43990.43990.4	NIETPYEPPIQQGQGDTSQFDKYPEEDINYGVQGEDPYADLFR		4	6896.55	1241.57	1242.07	1.9999	2.0019	4964.24	4962.24	1e-15	56.69	52.316	1	0		2.0042:Label:18O(1) (O18 Labeling), 1.9941:Label:15N(2) (15N(2)), 1.9979:Glu->Met (Glu->Met substitution)	0		TRUE	TPK1	sp|P06244|KAPA_YEAST	cAMP-dependent protein kinase type 1
20180918_Lumos_RSLC6_Reiter_Ammerer_MFPL_onbead_Tpk1_1_1.43992.43992.4	NIETPYEPPIQQGQGDTSQFDKYPEEDINYGVQGEDPYADLFR		4	6896.91	1241.57	1231.06	-42.0352	-42.0332	4920.21	4962.24	1.364e-07	31.869	30.004	1	0		Unknown	0		TRUE	TPK1	sp|P06244|KAPA_YEAST	cAMP-dependent protein kinase type 1
20180918_Lumos_RSLC6_Reiter_Ammerer_MFPL_onbead_Tpk1_1_1.43996.43996.5	NIETPYEPPIQQGQGDTSQFDKYPEEDINYGVQGEDPYADLFR		5	6897.47	993.456	998.448	24.9633	24.9653	4987.2	4962.24	2.391e-14	47.244	47.244	1	0		Unknown	0		TRUE	TPK1	sp|P06244|KAPA_YEAST	cAMP-dependent protein kinase type 1
20180918_Lumos_RSLC6_Reiter_Ammerer_MFPL_onbead_Tpk1_1_1.44005.44005.4	NIETPYEPPIQQGQGDTSQFDKYPEEDINYGVQGEDPYADLFR		4	6898.79	1241.57	1237.81	-15.0171	-15.0151	4947.22	4962.24	6.289e-13	50.731	48.068	1	0		-15.0109:Ser->LacticAcid (lactic acid from N-term Ser), -15.0109:Lys->Xle (Lys->Leu/Ile substitution), -15.0109:ISD_z+2_ion (ISD (z+2)-series)	0		TRUE	TPK1	sp|P06244|KAPA_YEAST	cAMP-dependent protein kinase type 1
20180918_Lumos_RSLC6_Reiter_Ammerer_MFPL_onbead_Tpk1_1_1.44009.44009.4	NIETPYEPPIQQGQGDTSQFDKYPEEDINYGVQGEDPYADLFR		4	6899.53	1241.57	1234.31	-29.022	-29.02	4933.22	4962.24	0.06383	24.159	24.159	0.2485	0		-29.0265:Lys->Val (Lys->Val substitution)	0		TRUE	TPK1	sp|P06244|KAPA_YEAST	cAMP-dependent protein kinase type 1
20180918_Lumos_RSLC6_Reiter_Ammerer_MFPL_onbead_Tpk1_1_1.44011.44011.5	NIETPYEPPIQQGQGDTSQFDKYPEEDINYGVQGEDPYADLFR		5	6899.85	993.456	1006.04	62.9145	62.9165	5025.16	4962.24	4.983e-10	39.652	39.652	1	0		Unknown	0		TRUE	TPK1	sp|P06244|KAPA_YEAST	cAMP-dependent protein kinase type 1
20180918_Lumos_RSLC6_Reiter_Ammerer_MFPL_onbead_Tpk1_1_1.44017.44017.4	NIETPYEPPIQQGQGDTSQFDKYPEEDINYGVQGEDPYADLFR	NIETPYEPPIQQGQGDT[181]S[167]QFDKYPEEDINYGVQGEDPYADLFR	4	6900.82	1281.55	1258.05	-93.9854	-93.9834	5028.19	5122.17	9.253e-14	46.822	44.95	1	0	17T(79.9663), 18S(79.9663)	Unknown	0		FALSE	TPK1	sp|P06244|KAPA_YEAST	cAMP-dependent protein kinase type 1
20180918_Lumos_RSLC6_Reiter_Ammerer_MFPL_onbead_Tpk1_1_1.44039.44039.4	NIETPYEPPIQQGQGDTSQFDKYPEEDINYGVQGEDPYADLFR		4	6904.34	1241.57	1227.3	-57.0582	-57.0562	4905.18	4962.24	1.381e-06	21.669	21.669	1	0		-57.0578:Lys->Ala (Lys->Ala substitution)	0		TRUE	TPK1	sp|P06244|KAPA_YEAST	cAMP-dependent protein kinase type 1
20180918_Lumos_RSLC6_Reiter_Ammerer_MFPL_onbead_Tpk1_1_1.44042.44042.4	NIETPYEPPIQQGQGDTSQFDKYPEEDINYGVQGEDPYADLFR		4	6904.8	1241.57	1263.8	88.9174	88.9194	5051.16	4962.24	0.0005069	21.967	21.967	1	0		Unknown	0		TRUE	TPK1	sp|P06244|KAPA_YEAST	cAMP-dependent protein kinase type 1
20180918_Lumos_RSLC6_Reiter_Ammerer_MFPL_onbead_Tpk1_1_1.44068.44068.4	NIETPYEPPIQQGQGDTSQFDKYPEEDINYGVQGEDPYADLFR	NIETPYEPPIQQGQGDT[181]SQFDKYPEEDINYGVQGEDPYADLFR	4	6908.86	1261.56	1247.56	-55.982	-55.98	4986.23	5042.21	1.763e-11	41.751	41.11	1	0	17T(79.9663)	Unknown	0		FALSE	TPK1	sp|P06244|KAPA_YEAST	cAMP-dependent protein kinase type 1
20180918_Lumos_RSLC6_Reiter_Ammerer_MFPL_onbead_Tpk1_1_1.44069.44069.4	NIETPYEPPIQQGQGDTSQFDKYPEEDINYGVQGEDPYADLFR	NIETPYEPPIQQGQGDT[181]SQFDKYPEEDINYGVQGEDPYADLFR	4	6909.13	1261.56	1251.56	-40.0123	-40.0103	5002.2	5042.21	2.831e-12	44.634	41.882	1	0	17T(79.9663)	-40.0061:His->Pro (His->Pro substitution)	0		FALSE	TPK1	sp|P06244|KAPA_YEAST	cAMP-dependent protein kinase type 1
20180918_Lumos_RSLC6_Reiter_Ammerer_MFPL_onbead_Tpk1_1_1.44078.44078.4	NIETPYEPPIQQGQGDTSQFDKYPEEDINYGVQGEDPYADLFR		4	6910.5	1241.57	1227.81	-55.0455	-55.0435	4907.2	4962.24	0.004251	15.39	15.39	0.9914	0		-55.0534:Arg->Thr (Arg->Thr substitution), -55.0388:Trp->Met (Trp->Met substitution)	0		TRUE	TPK1	sp|P06244|KAPA_YEAST	cAMP-dependent protein kinase type 1
20180918_Lumos_RSLC6_Reiter_Ammerer_MFPL_onbead_Tpk1_1_1.44103.44103.5	NIETPYEPPIQQGQGDTSQFDKYPEEDINYGVQGEDPYADLFR		5	6914.52	993.456	998.648	25.9638	25.9658	4988.2	4962.24	7.81e-13	42.57	42.57	1	0		Unknown	0		TRUE	TPK1	sp|P06244|KAPA_YEAST	cAMP-dependent protein kinase type 1
20180918_Lumos_RSLC6_Reiter_Ammerer_MFPL_onbead_Tpk1_1_1.44115.44115.5	NIETPYEPPIQQGQGDTSQFDKYPEEDINYGVQGEDPYADLFR		5	6916.31	993.456	998.848	26.9643	26.9663	4989.21	4962.24	1.501e-12	42.534	42.534	1	0		Unknown	0		TRUE	TPK1	sp|P06244|KAPA_YEAST	cAMP-dependent protein kinase type 1
20180918_Lumos_RSLC6_Reiter_Ammerer_MFPL_onbead_Tpk1_1_1.44118.44118.5	NIETPYEPPIQQGQGDTSQFDKYPEEDINYGVQGEDPYADLFR		5	6916.67	993.456	1001.65	40.9516	40.9536	5003.19	4962.24	5.769e-11	37.193	37.193	1	0		Unknown	0		TRUE	TPK1	sp|P06244|KAPA_YEAST	cAMP-dependent protein kinase type 1
20180918_Lumos_RSLC6_Reiter_Ammerer_MFPL_onbead_Tpk1_1_1.44124.44124.5	NIETPYEPPIQQGQGDTSQFDKYPEEDINYGVQGEDPYADLFR		5	6917.73	993.456	998.848	26.9623	26.9643	4989.2	4962.24	5.581e-13	44.473	44.473	1	0		Unknown	0		TRUE	TPK1	sp|P06244|KAPA_YEAST	cAMP-dependent protein kinase type 1
20180918_Lumos_RSLC6_Reiter_Ammerer_MFPL_onbead_Tpk1_1_1.44126.44126.3	FPPFFNEDVKDLLSR		3	6918.04	608.649	608.648	-0.002	0	1822.92	1822.93	3.134e-11	47.775	19.711	1	0		Unknown	0		TRUE	TPK1	sp|P06244|KAPA_YEAST	cAMP-dependent protein kinase type 1
20180918_Lumos_RSLC6_Reiter_Ammerer_MFPL_onbead_Tpk1_1_1.44131.44131.2	YPEEDINYGVQGEDPYADLFR		2	6918.87	1245.56	1251.81	12.4936	12.4956	2501.6	2489.1	1.357e-11	37.241	33.285	1	0		Unknown	0		TRUE	TPK1	sp|P06244|KAPA_YEAST	cAMP-dependent protein kinase type 1
20180918_Lumos_RSLC6_Reiter_Ammerer_MFPL_onbead_Tpk1_1_1.44207.44207.3	FPPFFNEDVKDLLSR		3	6930.77	608.649	628.324	59.0265	59.0285	1881.95	1822.93	1.126e-07	36.375	21.751	0.9998	0		59.0363:Propionyl:13C(3) (Propionate labeling reagent heavy form (+3amu), N-term & K), 59.0194:AEC-MAEC (aminoethylcysteine)	0		TRUE	TPK1	sp|P06244|KAPA_YEAST	cAMP-dependent protein kinase type 1
20180918_Lumos_RSLC6_Reiter_Ammerer_MFPL_onbead_Tpk1_1_1.44213.44213.4	NIETPYEPPIQQGQGDTSQFDKYPEEDINYGVQGEDPYADLFR		4	6931.63	1241.57	1242.07	2.0029	2.0049	4964.24	4962.24	1e-15	54.405	50.283	1	0		2.0042:Label:18O(1) (O18 Labeling), 1.9979:Glu->Met (Glu->Met substitution)	0		TRUE	TPK1	sp|P06244|KAPA_YEAST	cAMP-dependent protein kinase type 1
20180918_Lumos_RSLC6_Reiter_Ammerer_MFPL_onbead_Tpk1_1_1.44254.44254.2	FPPFFNEDVK		2	6938.27	620.306	620.305	-0.0012	0.0008	1238.6	1238.6	0.00337	17.548	12.733	0.9999	0		Unknown	0		TRUE	TPK1	sp|P06244|KAPA_YEAST	cAMP-dependent protein kinase type 1
20180918_Lumos_RSLC6_Reiter_Ammerer_MFPL_onbead_Tpk1_1_1.44261.44261.4	NIETPYEPPIQQGQGDTSQFDKYPEEDINYGVQGEDPYADLFR	NIETPYEPPIQQGQGDT[181]SQFDKYPEEDINYGVQGEDPYADLFR	4	6939.4	1261.56	1251.56	-40.0113	-40.0093	5002.2	5042.21	3.748e-13	43.326	41.742	1	0	17T(79.9663)	-40.0061:His->Pro (His->Pro substitution)	0		FALSE	TPK1	sp|P06244|KAPA_YEAST	cAMP-dependent protein kinase type 1
20180918_Lumos_RSLC6_Reiter_Ammerer_MFPL_onbead_Tpk1_1_1.44290.44290.3	FPPFFNEDVKDLLSR		3	6943.96	608.649	627.99	58.0214	58.0234	1880.95	1822.93	5.3e-08	36.264	27.744	1	0		58.0293:Carbofuran (2,3-dihydro-2,2-dimethyl-7-benzofuranol N-methyl carbamate), 58.0207:Gln->Trp (Gln->Trp substitution)	0		TRUE	TPK1	sp|P06244|KAPA_YEAST	cAMP-dependent protein kinase type 1
20180918_Lumos_RSLC6_Reiter_Ammerer_MFPL_onbead_Tpk1_1_1.44301.44301.4	NIETPYEPPIQQGQGDTSQFDKYPEEDINYGVQGEDPYADLFR		4	6945.66	1241.57	1254.06	49.977	49.979	5012.22	4962.24	8.089e-06	27.708	27.708	1	0		49.9793:Xle->Tyr (Leu/Ile->Tyr substitution)	0		TRUE	TPK1	sp|P06244|KAPA_YEAST	cAMP-dependent protein kinase type 1
20180918_Lumos_RSLC6_Reiter_Ammerer_MFPL_onbead_Tpk1_1_1.44306.44306.4	NIETPYEPPIQQGQGDTSQFDKYPEEDINYGVQGEDPYADLFR		4	6946.5	1241.57	1247.57	23.9897	23.9917	4986.23	4962.24	2.538e-10	41.897	40.034	1	0		Unknown	0		TRUE	TPK1	sp|P06244|KAPA_YEAST	cAMP-dependent protein kinase type 1
20180918_Lumos_RSLC6_Reiter_Ammerer_MFPL_onbead_Tpk1_1_1.44336.44336.3	FPPFFNEDVKDLLSR		3	6951.24	608.649	608.983	1.0011	1.0031	1823.93	1822.93	2.029e-11	49.276	19.226	1	0		0.9970:Label:15N(1) (15N(1))	0		TRUE	TPK1	sp|P06244|KAPA_YEAST	cAMP-dependent protein kinase type 1
20180918_Lumos_RSLC6_Reiter_Ammerer_MFPL_onbead_Tpk1_1_1.44352.44352.5	NIETPYEPPIQQGQGDTSQFDKYPEEDINYGVQGEDPYADLFR		5	6953.79	993.456	998.448	24.9648	24.9668	4987.21	4962.24	2.604e-10	39.752	39.752	1	0		Unknown	0		TRUE	TPK1	sp|P06244|KAPA_YEAST	cAMP-dependent protein kinase type 1
20180918_Lumos_RSLC6_Reiter_Ammerer_MFPL_onbead_Tpk1_1_1.44369.44369.4	NIETPYEPPIQQGQGDTSQFDKYPEEDINYGVQGEDPYADLFR		4	6956.49	1241.57	1251.81	40.9648	40.9668	5003.21	4962.24	7.019e-06	28.147	28.147	1	0		Unknown	0		TRUE	TPK1	sp|P06244|KAPA_YEAST	cAMP-dependent protein kinase type 1
20180918_Lumos_RSLC6_Reiter_Ammerer_MFPL_onbead_Tpk1_1_1.44393.44393.5	NIETPYEPPIQQGQGDTSQFDKYPEEDINYGVQGEDPYADLFR		5	6960.33	993.456	1001.44	39.9453	39.9473	5002.19	4962.24	8.651e-10	39.899	39.899	1	0		Unknown	0		TRUE	TPK1	sp|P06244|KAPA_YEAST	cAMP-dependent protein kinase type 1
20180918_Lumos_RSLC6_Reiter_Ammerer_MFPL_onbead_Tpk1_1_1.44402.44402.2	ITDFGFAK		2	6961.72	449.737	449.737	-0.0009	0.0011	897.459	897.46	0.002257	17.449	12.276	0.9999	0		Unknown	0		FALSE	TPK3	sp|P05986|KAPC_YEAST	cAMP-dependent protein kinase type 3	sp|P06244|KAPA_YEAST, sp|P06245|KAPB_YEAST
20180918_Lumos_RSLC6_Reiter_Ammerer_MFPL_onbead_Tpk1_3_3.40990.40990.3	YVPDVTYTLCGTPDYIAPEVVSTKPYNK		3	6043.4	1045.19	1174.2	387.039	387.041	3519.58	3132.54	7.792e-11	39.965	39.965	1	0		Unknown	0		FALSE	TPK3	sp|P05986|KAPC_YEAST	cAMP-dependent protein kinase type 3	sp|P06244|KAPA_YEAST
20180918_Lumos_RSLC6_Reiter_Ammerer_MFPL_onbead_Tpk1_1_1.44483.44483.4	NIETPYEPPIQQGQGDTSQFDKYPEEDINYGVQGEDPYADLFR		4	6974.5	1241.57	1242.07	2.0014	2.0034	4964.24	4962.24	5.121e-15	54.436	50.319	1	0		2.0042:Label:18O(1) (O18 Labeling), 1.9941:Label:15N(2) (15N(2)), 1.9979:Glu->Met (Glu->Met substitution)	0		TRUE	TPK1	sp|P06244|KAPA_YEAST	cAMP-dependent protein kinase type 1
20180918_Lumos_RSLC6_Reiter_Ammerer_MFPL_onbead_Tpk1_1_1.44491.44491.2	YSLQDFQILR		2	6975.69	641.843	642.344	1.0022	1.0042	1282.67	1281.67	0.1575	22.331	21.585	0.9977	0		0.9970:Label:15N(1) (15N(1))	0		TRUE	TPK1	sp|P06244|KAPA_YEAST	cAMP-dependent protein kinase type 1
20180918_Lumos_RSLC6_Reiter_Ammerer_MFPL_onbead_Tpk1_1_1.44501.44501.3	FPPFFNEDVKDLLSR		3	6977.3	608.649	627.99	58.0223	58.0243	1880.95	1822.93	9.377e-12	47.478	19.763	1	0		58.0293:Carbofuran (2,3-dihydro-2,2-dimethyl-7-benzofuranol N-methyl carbamate), 58.0207:Gln->Trp (Gln->Trp substitution)	0		TRUE	TPK1	sp|P06244|KAPA_YEAST	cAMP-dependent protein kinase type 1
20180918_Lumos_RSLC6_Reiter_Ammerer_MFPL_onbead_Tpk1_1_1.44542.44542.2	FPPFFNEDVK		2	6983.8	620.306	620.323	0.0349	0.0369	1238.63	1238.6	0.02607	15.097	11.482	0.9991	0		0.0364:Gln->Lys (Gln->Lys substitution)	0		TRUE	TPK1	sp|P06244|KAPA_YEAST	cAMP-dependent protein kinase type 1
20180918_Lumos_RSLC6_Reiter_Ammerer_MFPL_onbead_Tpk1_4_3.42692.42692.3	YVPDVTYTLCGTPDYIAPEVVSTKPYNK		3	6194.67	1045.19	1174.2	387.039	387.041	3519.58	3132.54	0.003429	23.51	23.51	0.9727	0		Unknown	0		FALSE	TPK3	sp|P05986|KAPC_YEAST	cAMP-dependent protein kinase type 3	sp|P06244|KAPA_YEAST
20180918_Lumos_RSLC6_Reiter_Ammerer_MFPL_onbead_Tpk1_1_2.42539.42539.4	YVPDVTYTLCGTPDYIAPEVVSTKPYNK		4	6042.73	784.141	880.901	387.038	387.041	3519.57	3132.54	6.448e-10	48.376	48.376	1	0		Unknown	0		FALSE	TPK3	sp|P05986|KAPC_YEAST	cAMP-dependent protein kinase type 3	sp|P06244|KAPA_YEAST
20180918_Lumos_RSLC6_Reiter_Ammerer_MFPL_onbead_Tpk1_2_3.41195.41195.3	YVPDVTYTLCGTPDYIAPEVVSTKPYNK		3	6096.49	1045.19	1174.2	387.039	387.041	3519.57	3132.54	4.366e-10	39.864	39.864	1	0		Unknown	0		FALSE	TPK3	sp|P05986|KAPC_YEAST	cAMP-dependent protein kinase type 3	sp|P06244|KAPA_YEAST
20180918_Lumos_RSLC6_Reiter_Ammerer_MFPL_onbead_Tpk1_1_1.44588.44588.2	YPEEDINYGVQGEDPYADLFR		2	6991.11	1245.56	998.986	-493.145	-493.143	1995.96	2489.1	0.0002297	22.321	16.622	0.999	0		Unknown	0		TRUE	TPK1	sp|P06244|KAPA_YEAST	cAMP-dependent protein kinase type 1
20180918_Lumos_RSLC6_Reiter_Ammerer_MFPL_onbead_Tpk1_1_1.44609.44609.4	NIETPYEPPIQQGQGDTSQFDKYPEEDINYGVQGEDPYADLFR	NIETPYEPPIQQGQGDT[181]SQFDKYPEEDINYGVQGEDPYADLFR	4	6994.37	1261.56	1247.81	-54.9786	-54.9766	4987.23	5042.21	1.031e-11	43.852	43.85	1	0	17T(79.9663)	Unknown	0		FALSE	TPK1	sp|P06244|KAPA_YEAST	cAMP-dependent protein kinase type 1
20180918_Lumos_RSLC6_Reiter_Ammerer_MFPL_onbead_Tpk1_3_2.41706.41706.3	YVPDVTYTLCGTPDYIAPEVVSTKPYNK		3	6053.13	1045.19	1174.2	387.038	387.041	3519.57	3132.54	2.795e-09	37.034	37.034	1	0		Unknown	0		FALSE	TPK3	sp|P05986|KAPC_YEAST	cAMP-dependent protein kinase type 3	sp|P06244|KAPA_YEAST
20180918_Lumos_RSLC6_Reiter_Ammerer_MFPL_onbead_Tpk1_1_1.44652.44652.5	NIETPYEPPIQQGQGDTSQFDKYPEEDINYGVQGEDPYADLFR		5	7001.25	993.456	998.849	26.9672	26.9692	4989.21	4962.24	4.414e-05	26.354	26.354	1	0		Unknown	0		TRUE	TPK1	sp|P06244|KAPA_YEAST	cAMP-dependent protein kinase type 1
20180918_Lumos_RSLC6_Reiter_Ammerer_MFPL_onbead_Tpk1_1_1.44667.44667.5	NIETPYEPPIQQGQGDTSQFDKYPEEDINYGVQGEDPYADLFR		5	7003.6	993.456	1001.25	38.9501	38.9521	5001.19	4962.24	2.359e-06	28.348	28.348	1	0		Unknown	0		TRUE	TPK1	sp|P06244|KAPA_YEAST	cAMP-dependent protein kinase type 1
20180918_Lumos_RSLC6_Reiter_Ammerer_MFPL_onbead_Tpk1_1_1.44689.44689.4	NIETPYEPPIQQGQGDTSQFDKYPEEDINYGVQGEDPYADLFR		4	7007	1241.57	1242.32	3.0024	3.0044	4965.24	4962.24	1.397e-13	51.639	47.515	1	0		3.0101:Label:13C(3) (13C3 label for SILAC)	0		TRUE	TPK1	sp|P06244|KAPA_YEAST	cAMP-dependent protein kinase type 1
20180918_Lumos_RSLC6_Reiter_Ammerer_MFPL_onbead_Tpk1_1_1.44700.44700.2	FPPFFNEDVK		2	7008.79	620.306	620.305	-0.0009	0.0011	1238.6	1238.6	0.002605	17.698	12.34	0.9999	0		Unknown	0		TRUE	TPK1	sp|P06244|KAPA_YEAST	cAMP-dependent protein kinase type 1
20180918_Lumos_RSLC6_Reiter_Ammerer_MFPL_onbead_Tpk1_1_1.44706.44706.3	FPPFFNEDVKDLLSR		3	7009.77	608.649	608.982	1.0003	1.0023	1823.93	1822.93	1.327e-09	47.699	20.252	1	0		0.9970:Label:15N(1) (15N(1))	0		TRUE	TPK1	sp|P06244|KAPA_YEAST	cAMP-dependent protein kinase type 1
20180918_Lumos_RSLC6_Reiter_Ammerer_MFPL_onbead_Tpk1_1_1.44710.44710.3	FPPFFNEDVKDLLSR		3	7010.41	608.649	627.99	58.0227	58.0247	1880.95	1822.93	3.427e-11	47.394	19.708	1	0		58.0293:Carbofuran (2,3-dihydro-2,2-dimethyl-7-benzofuranol N-methyl carbamate), 58.0207:Gln->Trp (Gln->Trp substitution)	0		TRUE	TPK1	sp|P06244|KAPA_YEAST	cAMP-dependent protein kinase type 1
20180918_Lumos_RSLC6_Reiter_Ammerer_MFPL_onbead_Tpk1_1_1.44728.44728.2	YSLQDFQILR		2	7013.26	641.843	641.843	-0.0011	0.0009	1281.67	1281.67	0.06144	22.153	21.826	0.9986	0		Unknown	0		TRUE	TPK1	sp|P06244|KAPA_YEAST	cAMP-dependent protein kinase type 1
20180918_Lumos_RSLC6_Reiter_Ammerer_MFPL_onbead_Tpk1_1_1.44824.44824.4	NIETPYEPPIQQGQGDTSQFDKYPEEDINYGVQGEDPYADLFR		4	7028.48	1241.57	1237.81	-15.0191	-15.0171	4947.22	4962.24	5.599e-08	27.228	25.294	1	0		-15.0109:ISD_z+2_ion (ISD (z+2)-series), -15.0109:Ser->LacticAcid (lactic acid from N-term Ser), -15.0109:Lys->Xle (Lys->Leu/Ile substitution)	0		TRUE	TPK1	sp|P06244|KAPA_YEAST	cAMP-dependent protein kinase type 1
20180918_Lumos_RSLC6_Reiter_Ammerer_MFPL_onbead_Tpk1_1_1.44830.44830.4	NIETPYEPPIQQGQGDTSQFDKYPEEDINYGVQGEDPYADLFR		4	7029.41	1241.57	1251.81	40.9663	40.9683	5003.21	4962.24	0.001242	22.843	22.843	0.9987	0		Unknown	0		TRUE	TPK1	sp|P06244|KAPA_YEAST	cAMP-dependent protein kinase type 1
20180918_Lumos_RSLC6_Reiter_Ammerer_MFPL_onbead_Tpk1_1_1.44838.44838.4	NIETPYEPPIQQGQGDTSQFDKYPEEDINYGVQGEDPYADLFR		4	7030.7	1241.57	1237.82	-15.0084	-15.0064	4947.23	4962.24	9.93e-09	29.563	25.575	1	0		-15.0109:ISD_z+2_ion (ISD (z+2)-series), -14.9997:Glu->Asn (Glu->Asn substitution), -15.0109:Ser->LacticAcid (lactic acid from N-term Ser), -15.0109:Lys->Xle (Lys->Leu/Ile substitution)	0		TRUE	TPK1	sp|P06244|KAPA_YEAST	cAMP-dependent protein kinase type 1
20180918_Lumos_RSLC6_Reiter_Ammerer_MFPL_onbead_Tpk1_1_1.44860.44860.2	YPEEDINYGVQGEDPYADLFR		2	7034.17	1245.56	1238.06	-14.989	-14.987	2474.11	2489.1	0.6014	13.811	11.275	0.3561	0		Unknown	0		TRUE	TPK1	sp|P06244|KAPA_YEAST	cAMP-dependent protein kinase type 1
20180918_Lumos_RSLC6_Reiter_Ammerer_MFPL_onbead_Tpk1_1_1.44864.44864.3	FPPFFNEDVKDLLSR		3	7034.84	608.649	627.99	58.0219	58.0239	1880.95	1822.93	1.025e-10	44.489	19.724	1	0		58.0293:Carbofuran (2,3-dihydro-2,2-dimethyl-7-benzofuranol N-methyl carbamate), 58.0207:Gln->Trp (Gln->Trp substitution)	0		TRUE	TPK1	sp|P06244|KAPA_YEAST	cAMP-dependent protein kinase type 1
20180918_Lumos_RSLC6_Reiter_Ammerer_MFPL_onbead_Tpk1_1_1.44895.44895.4	NIETPYEPPIQQGQGDTSQFDKYPEEDINYGVQGEDPYADLFR		4	7039.64	1241.57	1242.07	1.9985	2.0005	4964.24	4962.24	2.567e-15	54.401	50.285	1	0		1.9941:Label:15N(2) (15N(2)), 1.9979:Glu->Met (Glu->Met substitution), 2.0042:Label:18O(1) (O18 Labeling)	0		TRUE	TPK1	sp|P06244|KAPA_YEAST	cAMP-dependent protein kinase type 1
20180918_Lumos_RSLC6_Reiter_Ammerer_MFPL_onbead_Tpk1_1_1.44904.44904.2	ITDFGFAK		2	7041.14	449.737	449.737	-0.0011	0.0009	897.458	897.46	1.098	11.439	11.439	0.9747	0		Unknown	0		FALSE	TPK3	sp|P05986|KAPC_YEAST	cAMP-dependent protein kinase type 3	sp|P06244|KAPA_YEAST, sp|P06245|KAPB_YEAST
20180918_Lumos_RSLC6_Reiter_Ammerer_MFPL_onbead_Tpk1_1_1.44912.44912.3	FPPFFNEDVKDLLSR		3	7042.43	608.649	608.648	-0.0025	-0.0005	1822.92	1822.93	2.182e-12	49.303	19.568	1	0		Unknown	0		TRUE	TPK1	sp|P06244|KAPA_YEAST	cAMP-dependent protein kinase type 1
20180918_Lumos_RSLC6_Reiter_Ammerer_MFPL_onbead_Tpk1_1_1.44918.44918.2	FPPFFNEDVK		2	7043.38	620.306	620.305	-0.0023	-0.0003	1238.59	1238.6	0.000243	19.692	12.97	1	0		Unknown	0		TRUE	TPK1	sp|P06244|KAPA_YEAST	cAMP-dependent protein kinase type 1
20180918_Lumos_RSLC6_Reiter_Ammerer_MFPL_onbead_Tpk1_1_1.44922.44922.4	NIETPYEPPIQQGQGDTSQFDKYPEEDINYGVQGEDPYADLFR		4	7043.99	1241.57	1287.83	185.042	185.044	5147.28	4962.24	7.485e-15	48.871	46.727	1	0		Unknown	0		TRUE	TPK1	sp|P06244|KAPA_YEAST	cAMP-dependent protein kinase type 1
20180918_Lumos_RSLC6_Reiter_Ammerer_MFPL_onbead_Tpk1_1_1.44939.44939.4	NIETPYEPPIQQGQGDTSQFDKYPEEDINYGVQGEDPYADLFR		4	7046.62	1241.57	1256.57	60.0234	60.0254	5022.26	4962.24	1.966e-11	43.088	40.306	1	0		Unknown	0		TRUE	TPK1	sp|P06244|KAPA_YEAST	cAMP-dependent protein kinase type 1
20180918_Lumos_RSLC6_Reiter_Ammerer_MFPL_onbead_Tpk1_1_1.44952.44952.4	NIETPYEPPIQQGQGDTSQFDKYPEEDINYGVQGEDPYADLFR		4	7048.69	1241.57	1256.32	59.0268	59.0288	5021.27	4962.24	3.341e-15	48.966	46.138	1	0		59.0363:Propionyl:13C(3) (Propionate labeling reagent heavy form (+3amu), N-term & K), 59.0194:AEC-MAEC (aminoethylcysteine)	0		TRUE	TPK1	sp|P06244|KAPA_YEAST	cAMP-dependent protein kinase type 1
20180918_Lumos_RSLC6_Reiter_Ammerer_MFPL_onbead_Tpk1_1_1.44962.44962.4	NIETPYEPPIQQGQGDTSQFDKYPEEDINYGVQGEDPYADLFR		4	7050.31	1241.57	1247.81	24.9824	24.9844	4987.22	4962.24	1.53e-12	43.696	41.696	1	0		Unknown	0		TRUE	TPK1	sp|P06244|KAPA_YEAST	cAMP-dependent protein kinase type 1
20180918_Lumos_RSLC6_Reiter_Ammerer_MFPL_onbead_Tpk1_1_1.44966.44966.2	YSLQDFQILR		2	7050.94	641.843	641.842	-0.0021	-0.0001	1281.67	1281.67	0.007899	20.567	19.972	0.9997	0		Unknown	0		TRUE	TPK1	sp|P06244|KAPA_YEAST	cAMP-dependent protein kinase type 1
20180918_Lumos_RSLC6_Reiter_Ammerer_MFPL_onbead_Tpk1_1_1.44978.44978.4	NIETPYEPPIQQGQGDTSQFDKYPEEDINYGVQGEDPYADLFR		4	7052.86	1241.57	1256.33	59.0332	59.0352	5021.27	4962.24	8.924e-13	46.083	43.196	1	0		59.0363:Propionyl:13C(3) (Propionate labeling reagent heavy form (+3amu), N-term & K), 59.0450:Methyl+Acetyl:2H(3) (Mono-methylated lysine labelled with Acetyl_heavy)	0		TRUE	TPK1	sp|P06244|KAPA_YEAST	cAMP-dependent protein kinase type 1
20180918_Lumos_RSLC6_Reiter_Ammerer_MFPL_onbead_Tpk1_2_2.40472.40472.4	YVPDVTYTLCGTPDYIAPEVVSTKPYNK		4	6233.62	784.141	880.901	387.038	387.041	3519.57	3132.54	2.548e-08	36.336	36.336	1	0		Unknown	0		FALSE	TPK3	sp|P05986|KAPC_YEAST	cAMP-dependent protein kinase type 3	sp|P06244|KAPA_YEAST
20180918_Lumos_RSLC6_Reiter_Ammerer_MFPL_onbead_Tpk1_1_1.45016.45016.4	NIETPYEPPIQQGQGDTSQFDKYPEEDINYGVQGEDPYADLFR		4	7058.82	1241.57	1246.32	19.0258	19.0278	4981.27	4962.24	1.105e-07	30.696	30.696	1	0		Unknown	0		TRUE	TPK1	sp|P06244|KAPA_YEAST	cAMP-dependent protein kinase type 1
20180918_Lumos_RSLC6_Reiter_Ammerer_MFPL_onbead_Tpk1_1_2.42522.42522.3	YVPDVTYTLCGTPDYIAPEVVSTKPYNK		3	6040.78	1045.19	1174.2	387.038	387.04	3519.57	3132.54	2.885e-09	37.072	37.072	1	0		Unknown	0		FALSE	TPK3	sp|P05986|KAPC_YEAST	cAMP-dependent protein kinase type 3	sp|P06244|KAPA_YEAST
20180918_Lumos_RSLC6_Reiter_Ammerer_MFPL_onbead_Tpk1_1_3.49968.49968.3	FYAAEVCLALEYLHSK		3	6956.22	619.647	721.67	306.069	306.072	2161.99	1855.92	1.314	19.241	17.059	0.276	0		Unknown	0		FALSE	TPK3	sp|P05986|KAPC_YEAST	cAMP-dependent protein kinase type 3	sp|P06244|KAPA_YEAST
20180918_Lumos_RSLC6_Reiter_Ammerer_MFPL_onbead_Tpk1_1_3.50002.50002.3	FYAAEVCLALEYLHSK		3	6961.4	619.647	721.67	306.069	306.072	2161.99	1855.92	0.7096	18.809	16.142	0.3949	0		Unknown	0		FALSE	TPK3	sp|P05986|KAPC_YEAST	cAMP-dependent protein kinase type 3	sp|P06244|KAPA_YEAST
20180918_Lumos_RSLC6_Reiter_Ammerer_MFPL_onbead_Tpk1_4_2.47253.47253.4	FYAAEVCLALEYLHSK		4	6874.94	464.987	541.504	306.069	306.072	2161.99	1855.92	6.23e-05	30.844	25.42	1	0		Unknown	0		FALSE	TPK3	sp|P05986|KAPC_YEAST	cAMP-dependent protein kinase type 3	sp|P06244|KAPA_YEAST
20180918_Lumos_RSLC6_Reiter_Ammerer_MFPL_onbead_Tpk1_2_1.41208.41208.4	YVPDVTYTLCGTPDYIAPEVVSTKPYNK		4	6154.19	784.141	880.901	387.038	387.04	3519.57	3132.54	5.794e-08	35.753	35.753	1	0		Unknown	0		FALSE	TPK3	sp|P05986|KAPC_YEAST	cAMP-dependent protein kinase type 3	sp|P06244|KAPA_YEAST
20180918_Lumos_RSLC6_Reiter_Ammerer_MFPL_onbead_Tpk1_1_1.45106.45106.3	FPPFFNEDVKDLLSR		3	7073.15	608.649	609.851	3.6059	3.6079	1826.53	1822.93	0.01595	20.846	15.245	0.9014	0		Unknown	0		TRUE	TPK1	sp|P06244|KAPA_YEAST	cAMP-dependent protein kinase type 1
20180918_Lumos_RSLC6_Reiter_Ammerer_MFPL_onbead_Tpk1_2_3.46170.46170.3	FYAAEVCLALEYLHSK		3	6844.83	619.647	721.67	306.069	306.071	2161.99	1855.92	0.01005	24.066	21.726	0.9907	0		Unknown	0		FALSE	TPK3	sp|P05986|KAPC_YEAST	cAMP-dependent protein kinase type 3	sp|P06244|KAPA_YEAST
20180918_Lumos_RSLC6_Reiter_Ammerer_MFPL_onbead_Tpk1_1_1.45136.45136.3	FPPFFNEDVKDLLSR		3	7077.94	608.649	608.982	0.9989	1.0009	1823.92	1822.93	6.577e-12	50.757	22.571	1	0		0.9970:Label:15N(1) (15N(1))	0		TRUE	TPK1	sp|P06244|KAPA_YEAST	cAMP-dependent protein kinase type 1
20180918_Lumos_RSLC6_Reiter_Ammerer_MFPL_onbead_Tpk1_1_1.45145.45145.4	NIETPYEPPIQQGQGDTSQFDKYPEEDINYGVQGEDPYADLFR		4	7079.33	1241.57	1287.83	185.039	185.041	5147.28	4962.24	9.149e-07	21.969	21.969	1	0		Unknown	0		TRUE	TPK1	sp|P06244|KAPA_YEAST	cAMP-dependent protein kinase type 1
20180918_Lumos_RSLC6_Reiter_Ammerer_MFPL_onbead_Tpk1_1_1.45146.45146.2	FPPFFNEDVK		2	7079.49	620.306	620.807	1.0017	1.0037	1239.6	1238.6	0.001237	18.867	13.431	0.9999	0		0.9970:Label:15N(1) (15N(1))	0		TRUE	TPK1	sp|P06244|KAPA_YEAST	cAMP-dependent protein kinase type 1
20180918_Lumos_RSLC6_Reiter_Ammerer_MFPL_onbead_Tpk1_1_1.45148.45148.4	NIETPYEPPIQQGQGDTSQFDKYPEEDINYGVQGEDPYADLFR		4	7079.73	1241.57	1242.07	2.0039	2.0059	4964.25	4962.24	1e-15	54.357	50.234	1	0		2.0042:Label:18O(1) (O18 Labeling), 1.9979:Glu->Met (Glu->Met substitution), 2.0156:Pro->Val (Pro->Val substitution)	0		TRUE	TPK1	sp|P06244|KAPA_YEAST	cAMP-dependent protein kinase type 1
20180918_Lumos_RSLC6_Reiter_Ammerer_MFPL_onbead_Tpk1_1_1.45153.45153.4	NIETPYEPPIQQGQGDTSQFDKYPEEDINYGVQGEDPYADLFR		4	7080.64	1241.57	1256.32	59.0278	59.0298	5021.27	4962.24	1.764e-07	29.008	27.693	1	0		59.0363:Propionyl:13C(3) (Propionate labeling reagent heavy form (+3amu), N-term & K)	0		TRUE	TPK1	sp|P06244|KAPA_YEAST	cAMP-dependent protein kinase type 1
20180918_Lumos_RSLC6_Reiter_Ammerer_MFPL_onbead_Tpk1_1_3.43445.43445.3	YVPDVTYTLCGTPDYIAPEVVSTKPYNK		3	6090.31	1045.19	1174.2	387.038	387.04	3519.57	3132.54	2.543e-11	41.838	41.838	1	0		Unknown	0		FALSE	TPK3	sp|P05986|KAPC_YEAST	cAMP-dependent protein kinase type 3	sp|P06244|KAPA_YEAST
20180918_Lumos_RSLC6_Reiter_Ammerer_MFPL_onbead_Tpk1_1_1.45192.45192.5	NIETPYEPPIQQGQGDTSQFDKYPEEDINYGVQGEDPYADLFR		5	7086.72	993.456	1001.85	41.955	41.957	5004.2	4962.24	7.933e-09	28.597	28.597	1	0		Unknown	0		TRUE	TPK1	sp|P06244|KAPA_YEAST	cAMP-dependent protein kinase type 1
20180918_Lumos_RSLC6_Reiter_Ammerer_MFPL_onbead_Tpk1_1_1.45216.45216.2	ITDFGFAK		2	7090.58	449.737	449.737	-0.0011	0.0009	897.458	897.46	0.02248	16.03	12.066	0.9992	0		Unknown	0		FALSE	TPK3	sp|P05986|KAPC_YEAST	cAMP-dependent protein kinase type 3	sp|P06244|KAPA_YEAST, sp|P06245|KAPB_YEAST
20180918_Lumos_RSLC6_Reiter_Ammerer_MFPL_onbead_Tpk1_3_3.46398.46398.4	FYAAEVCLALEYLHSK		4	6871.9	464.987	541.504	306.069	306.071	2161.99	1855.92	1.055e-05	33.888	30.383	1	0		Unknown	0		FALSE	TPK3	sp|P05986|KAPC_YEAST	cAMP-dependent protein kinase type 3	sp|P06244|KAPA_YEAST
20180918_Lumos_RSLC6_Reiter_Ammerer_MFPL_onbead_Tpk1_1_3.43192.43192.4	YVPDVTYTLCGTPDYIAPEVVSTKPYNK		4	6058.74	784.141	880.901	387.038	387.04	3519.57	3132.54	2.97e-12	51.362	51.362	1	0		Unknown	0		FALSE	TPK3	sp|P05986|KAPC_YEAST	cAMP-dependent protein kinase type 3	sp|P06244|KAPA_YEAST
20180918_Lumos_RSLC6_Reiter_Ammerer_MFPL_onbead_Tpk1_1_2.49660.49660.3	FYAAEVCLALEYLHSK		3	6949.75	619.647	721.67	306.069	306.071	2161.99	1855.92	0.01885	22.451	17.879	0.9862	0		Unknown	0		FALSE	TPK3	sp|P05986|KAPC_YEAST	cAMP-dependent protein kinase type 3	sp|P06244|KAPA_YEAST
20180918_Lumos_RSLC6_Reiter_Ammerer_MFPL_onbead_Tpk1_1_3.50430.50430.4	FYAAEVCLALEYLHSKDIIYR		4	7023.04	630.077	706.594	306.069	306.071	2822.35	2516.28	0.03413	24.981	20.471	0.9562	0		Unknown	0		FALSE	TPK3	sp|P05986|KAPC_YEAST	cAMP-dependent protein kinase type 3	sp|P06244|KAPA_YEAST
20180918_Lumos_RSLC6_Reiter_Ammerer_MFPL_onbead_Tpk1_1_1.45316.45316.2	YSLQDFQILR		2	7106.63	641.843	641.842	-0.0025	-0.0005	1281.67	1281.67	0.01647	22.115	21.346	0.9994	0		Unknown	0		TRUE	TPK1	sp|P06244|KAPA_YEAST	cAMP-dependent protein kinase type 1
20180918_Lumos_RSLC6_Reiter_Ammerer_MFPL_onbead_Tpk1_1_1.45370.45370.4	NIETPYEPPIQQGQGDTSQFDKYPEEDINYGVQGEDPYADLFR		4	7115.24	1241.57	1242.07	2.0034	2.0054	4964.24	4962.24	1e-15	56.631	52.254	1	0		2.0042:Label:18O(1) (O18 Labeling), 1.9979:Glu->Met (Glu->Met substitution)	0		TRUE	TPK1	sp|P06244|KAPA_YEAST	cAMP-dependent protein kinase type 1
20180918_Lumos_RSLC6_Reiter_Ammerer_MFPL_onbead_Tpk1_1_1.45381.45381.2	FPPFFNEDVK		2	7116.97	620.306	620.305	-0.0017	0.0003	1238.6	1238.6	0.0001016	18.721	11.264	1	0		Unknown	0		TRUE	TPK1	sp|P06244|KAPA_YEAST	cAMP-dependent protein kinase type 1
20180918_Lumos_RSLC6_Reiter_Ammerer_MFPL_onbead_Tpk1_1_1.45389.45389.3	FPPFFNEDVKDLLSR		3	7118.27	608.649	609.311	1.9862	1.9882	1824.91	1822.93	3.121e-10	47.893	20.951	1	0		1.9793:Val->Thr (Val->Thr substitution), 1.9941:Label:15N(2) (15N(2)), 1.9979:Glu->Met (Glu->Met substitution)	0		TRUE	TPK1	sp|P06244|KAPA_YEAST	cAMP-dependent protein kinase type 1
20180918_Lumos_RSLC6_Reiter_Ammerer_MFPL_onbead_Tpk1_1_1.45443.45443.4	NIETPYEPPIQQGQGDTSQFDKYPEEDINYGVQGEDPYADLFR		4	7126.84	1241.57	1245.82	17.0195	17.0215	4979.26	4962.24	0.01766	16.386	16.386	0.9581	0		17.0265:Ammonium (replacement of proton with ammonium ion)	0		TRUE	TPK1	sp|P06244|KAPA_YEAST	cAMP-dependent protein kinase type 1
20180918_Lumos_RSLC6_Reiter_Ammerer_MFPL_onbead_Tpk1_1_1.45466.45466.2	DLKPENILLDK		2	7130.5	649.372	649.371	-0.0021	-0.0001	1296.73	1296.73	2.75e-06	29.269	15.467	1	0		Unknown	0		FALSE	TPK3	sp|P05986|KAPC_YEAST	cAMP-dependent protein kinase type 3	sp|Q03407|PKH1_YEAST, sp|P06244|KAPA_YEAST, sp|P34244|HSL1_YEAST, sp|P38147|CHK1_YEAST
20180918_Lumos_RSLC6_Reiter_Ammerer_MFPL_onbead_Tpk1_1_1.45469.45469.2	YSLQDFQILR		2	7130.96	641.843	642.347	1.0077	1.0097	1282.68	1281.67	0.0639	19.973	19.413	0.9984	0		Unknown	0		TRUE	TPK1	sp|P06244|KAPA_YEAST	cAMP-dependent protein kinase type 1
20180918_Lumos_RSLC6_Reiter_Ammerer_MFPL_onbead_Tpk1_1_1.45485.45485.4	NIETPYEPPIQQGQGDTSQFDKYPEEDINYGVQGEDPYADLFR		4	7133.42	1241.57	1247.33	23.0395	23.0415	4985.28	4962.24	3.118e-12	41.718	39.836	1	0		Unknown	0		TRUE	TPK1	sp|P06244|KAPA_YEAST	cAMP-dependent protein kinase type 1
20180918_Lumos_RSLC6_Reiter_Ammerer_MFPL_onbead_Tpk1_1_1.45560.45560.2	YPEEDINYGVQGEDPYADLFR		2	7145.39	1245.56	1001.45	-488.215	-488.213	2000.89	2489.1	0.0003392	17.762	12.655	0.9967	0		Unknown	0		TRUE	TPK1	sp|P06244|KAPA_YEAST	cAMP-dependent protein kinase type 1
20180918_Lumos_RSLC6_Reiter_Ammerer_MFPL_onbead_Tpk1_1_1.45628.45628.4	NIETPYEPPIQQGQGDTSQFDKYPEEDINYGVQGEDPYADLFR		4	7156.21	1241.57	1242.32	3.0092	3.0112	4965.25	4962.24	7.297e-15	54.395	50.29	1	0		3.0188:Label:2H(3) (Trideuteration), 3.0101:Label:13C(3) (13C3 label for SILAC)	0		TRUE	TPK1	sp|P06244|KAPA_YEAST	cAMP-dependent protein kinase type 1
20180918_Lumos_RSLC6_Reiter_Ammerer_MFPL_onbead_Tpk1_1_1.45630.45630.2	DLKPENILLDK		2	7156.54	649.372	730.423	162.103	162.105	1458.83	1296.73	1.308	13.263	11.496	0.9436	0		Unknown	0		FALSE	TPK3	sp|P05986|KAPC_YEAST	cAMP-dependent protein kinase type 3	sp|Q03407|PKH1_YEAST, sp|P06244|KAPA_YEAST, sp|P34244|HSL1_YEAST, sp|P38147|CHK1_YEAST
20180918_Lumos_RSLC6_Reiter_Ammerer_MFPL_onbead_Tpk1_1_1.45659.45659.4	NIETPYEPPIQQGQGDTSQFDKYPEEDINYGVQGEDPYADLFR		4	7161.03	1241.57	1242.32	3.0043	3.0063	4965.25	4962.24	1e-15	54.426	50.312	1	0		3.0101:Label:13C(3) (13C3 label for SILAC)	0		TRUE	TPK1	sp|P06244|KAPA_YEAST	cAMP-dependent protein kinase type 1
20180918_Lumos_RSLC6_Reiter_Ammerer_MFPL_onbead_Tpk1_1_1.45663.45663.2	YSLQDFQILR		2	7161.78	641.843	642.346	1.005	1.007	1282.68	1281.67	0.002449	20.171	19.555	0.9999	0		0.9970:Label:15N(1) (15N(1))	0		TRUE	TPK1	sp|P06244|KAPA_YEAST	cAMP-dependent protein kinase type 1
20180918_Lumos_RSLC6_Reiter_Ammerer_MFPL_onbead_Tpk1_1_1.45665.45665.2	DLKPENILLDK		2	7162.02	649.372	649.371	-0.0016	0.0004	1296.73	1296.73	2.732e-06	29.263	29.263	1	0		Unknown	0		FALSE	TPK3	sp|P05986|KAPC_YEAST	cAMP-dependent protein kinase type 3	sp|P06244|KAPA_YEAST, sp|P34244|HSL1_YEAST, sp|P38147|CHK1_YEAST, sp|Q03407|PKH1_YEAST
20180918_Lumos_RSLC6_Reiter_Ammerer_MFPL_onbead_Tpk1_1_1.45720.45720.2	YSLQDFQILR		2	7170.73	641.843	642.347	1.0069	1.0089	1282.68	1281.67	0.005108	18.761	18.087	0.9998	0		Unknown	0		TRUE	TPK1	sp|P06244|KAPA_YEAST	cAMP-dependent protein kinase type 1
20180918_Lumos_RSLC6_Reiter_Ammerer_MFPL_onbead_Tpk1_1_1.45743.45743.4	NIETPYEPPIQQGQGDTSQFDKYPEEDINYGVQGEDPYADLFR	NIETPYEPPIQQGQGDT[181]SQFDKYPEEDINYGVQGEDPYADLFR	4	7174.41	1261.56	1273.54	47.9311	47.9331	5090.14	5042.21	2.775e-10	35.254	35.254	1	0	17T(79.9663)	Unknown	0		FALSE	TPK1	sp|P06244|KAPA_YEAST	cAMP-dependent protein kinase type 1
20180918_Lumos_RSLC6_Reiter_Ammerer_MFPL_onbead_Tpk1_1_1.45859.45859.4	NIETPYEPPIQQGQGDTSQFDKYPEEDINYGVQGEDPYADLFR		4	7192.88	1241.57	1242.32	3.0068	3.0088	4965.25	4962.24	1.179e-14	52.296	50.308	1	0		3.0101:Label:13C(3) (13C3 label for SILAC)	0		TRUE	TPK1	sp|P06244|KAPA_YEAST	cAMP-dependent protein kinase type 1
20180918_Lumos_RSLC6_Reiter_Ammerer_MFPL_onbead_Tpk1_1_1.45871.45871.2	FPPFFNEDVK		2	7194.76	620.306	620.305	-0.001	0.001	1238.6	1238.6	0.01237	17.633	13.256	0.9995	0		Unknown	0		TRUE	TPK1	sp|P06244|KAPA_YEAST	cAMP-dependent protein kinase type 1
20180918_Lumos_RSLC6_Reiter_Ammerer_MFPL_onbead_Tpk1_1_1.45880.45880.2	ITDFGFAK		2	7196.22	449.737	450.274	1.0741	1.0761	898.534	897.46	0.003632	14.685	10.416	0.9998	0		Unknown	0		FALSE	TPK3	sp|P05986|KAPC_YEAST	cAMP-dependent protein kinase type 3	sp|P06244|KAPA_YEAST, sp|P06245|KAPB_YEAST
20180918_Lumos_RSLC6_Reiter_Ammerer_MFPL_onbead_Tpk1_1_1.46024.46024.2	FPPFFNEDVK		2	7218.98	620.306	620.317	0.0213	0.0233	1238.62	1238.6	0.04244	15.443	12.135	0.9988	0		Unknown	0		TRUE	TPK1	sp|P06244|KAPA_YEAST	cAMP-dependent protein kinase type 1
20180918_Lumos_RSLC6_Reiter_Ammerer_MFPL_onbead_Tpk1_1_1.46090.46090.2	ITDFGFAK		2	7229.39	449.737	450.274	1.074	1.076	898.534	897.46	0.01125	14.034	10.26	0.9995	0		Unknown	0		FALSE	TPK3	sp|P05986|KAPC_YEAST	cAMP-dependent protein kinase type 3	sp|P06244|KAPA_YEAST, sp|P06245|KAPB_YEAST
20180918_Lumos_RSLC6_Reiter_Ammerer_MFPL_onbead_Tpk1_1_1.46115.46115.2	FPPFFNEDVK		2	7233.47	620.306	620.305	-0.0026	-0.0006	1238.59	1238.6	0.0009796	17.506	11.926	0.9999	0		Unknown	0		TRUE	TPK1	sp|P06244|KAPA_YEAST	cAMP-dependent protein kinase type 1
20180918_Lumos_RSLC6_Reiter_Ammerer_MFPL_onbead_Tpk1_1_1.46162.46162.4	NIETPYEPPIQQGQGDTSQFDKYPEEDINYGVQGEDPYADLFR		4	7240.86	1241.57	1247.56	23.9892	23.9912	4986.23	4962.24	5.063e-07	25.866	25.866	1	0		Unknown	0		TRUE	TPK1	sp|P06244|KAPA_YEAST	cAMP-dependent protein kinase type 1
20180918_Lumos_RSLC6_Reiter_Ammerer_MFPL_onbead_Tpk1_1_1.46171.46171.4	NIETPYEPPIQQGQGDTSQFDKYPEEDINYGVQGEDPYADLFR		4	7242.3	1241.57	1242.07	2.0043	2.0063	4964.25	4962.24	3.556e-15	54.438	50.308	1	0		2.0042:Label:18O(1) (O18 Labeling), 1.9979:Glu->Met (Glu->Met substitution), 2.0156:Pro->Val (Pro->Val substitution)	0		TRUE	TPK1	sp|P06244|KAPA_YEAST	cAMP-dependent protein kinase type 1
20180918_Lumos_RSLC6_Reiter_Ammerer_MFPL_onbead_Tpk1_1_1.46299.46299.2	ITDFGFAK		2	7262.63	449.737	450.274	1.074	1.076	898.534	897.46	0.01226	17.201	13.29	0.9995	0		Unknown	0		FALSE	TPK3	sp|P05986|KAPC_YEAST	cAMP-dependent protein kinase type 3	sp|P06244|KAPA_YEAST, sp|P06245|KAPB_YEAST
20180918_Lumos_RSLC6_Reiter_Ammerer_MFPL_onbead_Tpk1_1_1.46352.46352.4	NIETPYEPPIQQGQGDTSQFDKYPEEDINYGVQGEDPYADLFR		4	7271.05	1241.57	1246.32	19.017	19.019	4981.26	4962.24	7.023	13.629	13.629	0.2976	0		19.0137:Label:2H(3)+Oxidation (Oxidised 2H(3) labelled Methionine), 19.0098:Gln->Phe (Gln->Phe substitution)	0		TRUE	TPK1	sp|P06244|KAPA_YEAST	cAMP-dependent protein kinase type 1
20180918_Lumos_RSLC6_Reiter_Ammerer_MFPL_onbead_Tpk1_1_1.46356.46356.4	NIETPYEPPIQQGQGDTSQFDKYPEEDINYGVQGEDPYADLFR		4	7271.67	1241.57	1237.81	-15.0235	-15.0215	4947.22	4962.24	2.238e-08	31.624	29.751	1	0		Unknown	0		TRUE	TPK1	sp|P06244|KAPA_YEAST	cAMP-dependent protein kinase type 1
20180918_Lumos_RSLC6_Reiter_Ammerer_MFPL_onbead_Tpk1_1_1.46379.46379.4	NIETPYEPPIQQGQGDTSQFDKYPEEDINYGVQGEDPYADLFR		4	7275.34	1241.57	1242.32	3.0073	3.0093	4965.25	4962.24	1.406e-15	56.644	50.288	1	0		3.0188:Label:2H(3) (Trideuteration), 3.0101:Label:13C(3) (13C3 label for SILAC)	0		TRUE	TPK1	sp|P06244|KAPA_YEAST	cAMP-dependent protein kinase type 1
20180918_Lumos_RSLC6_Reiter_Ammerer_MFPL_onbead_Tpk1_1_1.46389.46389.4	NIETPYEPPIQQGQGDTSQFDKYPEEDINYGVQGEDPYADLFR	NIETPY[243]EPPIQQGQGDT[181]SQFDKY[243]PEEDINYGVQGEDPYADLFR	4	7276.91	1301.54	1247.81	-214.911	-214.909	4987.23	5202.14	1.431e-07	26.697	26.697	1	0	6Y(79.9663), 17T(79.9663), 23Y(79.9663)	Unknown	0		FALSE	TPK1	sp|P06244|KAPA_YEAST	cAMP-dependent protein kinase type 1
20180918_Lumos_RSLC6_Reiter_Ammerer_MFPL_onbead_Tpk1_1_1.46432.46432.4	NIETPYEPPIQQGQGDTSQFDKYPEEDINYGVQGEDPYADLFR		4	7283.77	1241.57	1247.07	22.0087	22.0107	4984.25	4962.24	8.231e-05	23.703	23.703	1	0		Unknown	0		TRUE	TPK1	sp|P06244|KAPA_YEAST	cAMP-dependent protein kinase type 1
20180918_Lumos_RSLC6_Reiter_Ammerer_MFPL_onbead_Tpk1_1_1.46515.46515.2	ITDFGFAK		2	7297.39	449.737	450.275	1.0748	1.0768	898.534	897.46	0.005896	16.89	13.041	0.9998	0		Unknown	0		FALSE	TPK3	sp|P05986|KAPC_YEAST	cAMP-dependent protein kinase type 3	sp|P06244|KAPA_YEAST, sp|P06245|KAPB_YEAST
20180918_Lumos_RSLC6_Reiter_Ammerer_MFPL_onbead_Tpk1_1_1.46647.46647.4	NIETPYEPPIQQGQGDTSQFDKYPEEDINYGVQGEDPYADLFR		4	7318.61	1241.57	1242.32	3.0092	3.0112	4965.25	4962.24	3.498e-15	54.354	50.226	1	0		3.0101:Label:13C(3) (13C3 label for SILAC), 3.0188:Label:2H(3) (Trideuteration)	0		TRUE	TPK1	sp|P06244|KAPA_YEAST	cAMP-dependent protein kinase type 1
20180918_Lumos_RSLC6_Reiter_Ammerer_MFPL_onbead_Tpk1_1_1.46657.46657.4	NIETPYEPPIQQGQGDTSQFDKYPEEDINYGVQGEDPYADLFR		4	7320.15	1241.57	1273.29	126.902	126.904	5089.14	4962.24	5.911e-05	21.831	21.831	1	0		Unknown	0		TRUE	TPK1	sp|P06244|KAPA_YEAST	cAMP-dependent protein kinase type 1
20180918_Lumos_RSLC6_Reiter_Ammerer_MFPL_onbead_Tpk1_1_1.46688.46688.2	VTSGKYSLQDFQILR		2	7325.1	877.976	641.842	-472.266	-472.264	1281.67	1753.94	0.02271	21.7	21.361	0.3021	0		Unknown	0		TRUE	TPK1	sp|P06244|KAPA_YEAST	cAMP-dependent protein kinase type 1
20180918_Lumos_RSLC6_Reiter_Ammerer_MFPL_onbead_Tpk1_1_1.46730.46730.3	FPPFFNEDVKDLLSR		3	7331.8	608.649	608.648	-0.0031	-0.0011	1822.92	1822.93	6.813e-12	52.327	19.73	1	0		Unknown	0		TRUE	TPK1	sp|P06244|KAPA_YEAST	cAMP-dependent protein kinase type 1
20180918_Lumos_RSLC6_Reiter_Ammerer_MFPL_onbead_Tpk1_1_1.46736.46736.4	NIETPYEPPIQQGQGDTSQFDKYPEEDINYGVQGEDPYADLFR	NIETPYEPPIQQGQGDTSQFDKY[243]PEEDINYGVQGEDPYADLFR	4	7332.73	1261.56	1246.07	-61.9512	-61.9492	4980.26	5042.21	2.317e-07	26.155	24.235	1	0	23Y(79.9663)	Unknown	0		FALSE	TPK1	sp|P06244|KAPA_YEAST	cAMP-dependent protein kinase type 1
20180918_Lumos_RSLC6_Reiter_Ammerer_MFPL_onbead_Tpk1_1_1.46843.46843.4	NIETPYEPPIQQGQGDTSQFDKYPEEDINYGVQGEDPYADLFR		4	7349.82	1241.57	1241.82	1.0097	1.0117	4963.25	4962.24	1.44e-15	54.479	50.347	1	0		Unknown	0		TRUE	TPK1	sp|P06244|KAPA_YEAST	cAMP-dependent protein kinase type 1
20180918_Lumos_RSLC6_Reiter_Ammerer_MFPL_onbead_Tpk1_1_1.46854.46854.4	NIETPYEPPIQQGQGDTSQFDKYPEEDINYGVQGEDPYADLFR		4	7351.53	1241.57	1242.07	2.0063	2.0083	4964.25	4962.24	1e-15	54.258	50.129	1	0		2.0042:Label:18O(1) (O18 Labeling), 2.0156:Pro->Val (Pro->Val substitution)	0		TRUE	TPK1	sp|P06244|KAPA_YEAST	cAMP-dependent protein kinase type 1
20180918_Lumos_RSLC6_Reiter_Ammerer_MFPL_onbead_Tpk1_1_1.46911.46911.2	DLKPENILLDK		2	7360.59	649.372	649.371	-0.0004	0.0016	1296.73	1296.73	3.111e-06	29.348	29.348	1	0		Unknown	0		FALSE	TPK3	sp|P05986|KAPC_YEAST	cAMP-dependent protein kinase type 3	sp|P06244|KAPA_YEAST, sp|P34244|HSL1_YEAST, sp|P38147|CHK1_YEAST, sp|Q03407|PKH1_YEAST
20180918_Lumos_RSLC6_Reiter_Ammerer_MFPL_onbead_Tpk1_1_1.46916.46916.2	DLKPENILLDK		2	7361.34	649.372	730.423	162.102	162.104	1458.83	1296.73	2.635	13.567	12.706	0.9136	0		Unknown	0		FALSE	TPK3	sp|P05986|KAPC_YEAST	cAMP-dependent protein kinase type 3	sp|P06244|KAPA_YEAST, sp|P34244|HSL1_YEAST, sp|P38147|CHK1_YEAST, sp|Q03407|PKH1_YEAST
20180918_Lumos_RSLC6_Reiter_Ammerer_MFPL_onbead_Tpk1_1_1.46995.46995.2	FPPFFNEDVK		2	7373.99	620.306	620.305	-0.0014	0.0006	1238.6	1238.6	2.463e-05	19.614	11.75	1	0		Unknown	0		TRUE	TPK1	sp|P06244|KAPA_YEAST	cAMP-dependent protein kinase type 1
20180918_Lumos_RSLC6_Reiter_Ammerer_MFPL_onbead_Tpk1_1_1.47105.47105.3	FPPFFNEDVKDLLSR		3	7391.26	608.649	608.982	0.9996	1.0016	1823.92	1822.93	3.103e-10	45.189	18.421	1	0		0.9970:Label:15N(1) (15N(1))	0		TRUE	TPK1	sp|P06244|KAPA_YEAST	cAMP-dependent protein kinase type 1
20180918_Lumos_RSLC6_Reiter_Ammerer_MFPL_onbead_Tpk1_1_1.47141.47141.2	YSLQDFQILR		2	7396.95	641.843	641.843	-0.0006	0.0014	1281.67	1281.67	0.001002	21.729	21.265	0.9999	0		Unknown	0		TRUE	TPK1	sp|P06244|KAPA_YEAST	cAMP-dependent protein kinase type 1
20180918_Lumos_RSLC6_Reiter_Ammerer_MFPL_onbead_Tpk1_1_1.47152.47152.4	NIETPYEPPIQQGQGDTSQFDKYPEEDINYGVQGEDPYADLFR		4	7398.72	1241.57	1241.82	0.9999	1.0019	4963.24	4962.24	1e-15	54.452	52.323	1	0		0.9970:Label:15N(1) (15N(1))	0		TRUE	TPK1	sp|P06244|KAPA_YEAST	cAMP-dependent protein kinase type 1
20180918_Lumos_RSLC6_Reiter_Ammerer_MFPL_onbead_Tpk1_1_1.47369.47369.2	FPPFFNEDVK		2	7424.11	620.306	701.858	163.105	163.107	1401.7	1238.6	0.0007305	18.857	12.357	0.9992	0		Unknown	0		TRUE	TPK1	sp|P06244|KAPA_YEAST	cAMP-dependent protein kinase type 1
20180918_Lumos_RSLC6_Reiter_Ammerer_MFPL_onbead_Tpk1_1_1.47698.47698.2	FPPFFNEDVK		2	7473.62	620.306	620.807	1.0016	1.0036	1239.6	1238.6	2.944	12.882	11.362	0.9435	0		0.9970:Label:15N(1) (15N(1))	0		TRUE	TPK1	sp|P06244|KAPA_YEAST	cAMP-dependent protein kinase type 1
20180918_Lumos_RSLC6_Reiter_Ammerer_MFPL_onbead_Tpk1_1_1.47714.47714.2	FPPFFNEDVK		2	7476.21	620.306	619.413	-1.7852	-1.7832	1236.81	1238.6	10.9	11.045	11.045	0.2844	0		Unknown	0		TRUE	TPK1	sp|P06244|KAPA_YEAST	cAMP-dependent protein kinase type 1
20180918_Lumos_RSLC6_Reiter_Ammerer_MFPL_onbead_Tpk1_1_1.47721.47721.2	YPEEDINYGVQGEDPYADLFR		2	7477.3	1245.56	1242.07	-6.9729	-6.9709	2482.13	2489.1	7.38e-08	28.149	22.958	1	0		-6.9622:Tyr->Arg (Tyr->Arg substitution)	0		TRUE	TPK1	sp|P06244|KAPA_YEAST	cAMP-dependent protein kinase type 1
20180918_Lumos_RSLC6_Reiter_Ammerer_MFPL_onbead_Tpk1_1_1.47735.47735.2	YSLQDFQILR		2	7479.59	641.843	641.386	-0.9138	-0.9118	1280.76	1281.67	0.0005302	17.731	16.796	0.999	0		Unknown	0		TRUE	TPK1	sp|P06244|KAPA_YEAST	cAMP-dependent protein kinase type 1
20180918_Lumos_RSLC6_Reiter_Ammerer_MFPL_onbead_Tpk1_1_1.47777.47777.4	NIETPYEPPIQQGQGDTSQFDKYPEEDINYGVQGEDPYADLFR		4	7486.32	1241.57	1242.32	3.0156	3.0176	4965.26	4962.24	6.637e-11	42.139	42.139	1	0		3.0188:Label:2H(3) (Trideuteration), 3.0101:Label:13C(3) (13C3 label for SILAC)	0		TRUE	TPK1	sp|P06244|KAPA_YEAST	cAMP-dependent protein kinase type 1
20180918_Lumos_RSLC6_Reiter_Ammerer_MFPL_onbead_Tpk1_1_1.47851.47851.2	FPPFFNEDVK		2	7498.32	620.306	620.921	1.23	1.232	1239.83	1238.6	3.498	11.808	11.808	0.9397	0		Unknown	0		TRUE	TPK1	sp|P06244|KAPA_YEAST	cAMP-dependent protein kinase type 1
20180918_Lumos_RSLC6_Reiter_Ammerer_MFPL_onbead_Tpk1_1_1.47884.47884.2	FPPFFNEDVK		2	7503.62	620.306	620.921	1.2298	1.2318	1239.83	1238.6	2.152	10.155	10.155	0.9513	0		Unknown	0		TRUE	TPK1	sp|P06244|KAPA_YEAST	cAMP-dependent protein kinase type 1
20180918_Lumos_RSLC6_Reiter_Ammerer_MFPL_onbead_Tpk1_1_1.47918.47918.2	FPPFFNEDVK		2	7509.06	620.306	620.305	-0.0019	0.0001	1238.6	1238.6	0.941	10.535	8.877	0.9783	0		Unknown	0		TRUE	TPK1	sp|P06244|KAPA_YEAST	cAMP-dependent protein kinase type 1
20180918_Lumos_RSLC6_Reiter_Ammerer_MFPL_onbead_Tpk1_1_1.47934.47934.2	FPPFFNEDVK		2	7511.67	620.306	620.405	0.1975	0.1995	1238.79	1238.6	0.03694	11.494	8.785	0.9989	0		Unknown	0		TRUE	TPK1	sp|P06244|KAPA_YEAST	cAMP-dependent protein kinase type 1
20180918_Lumos_RSLC6_Reiter_Ammerer_MFPL_onbead_Tpk1_1_1.47940.47940.4	NIETPYEPPIQQGQGDTSQFDKYPEEDINYGVQGEDPYADLFR		4	7512.6	1241.57	1242.32	3.0175	3.0195	4965.26	4962.24	2.067e-10	32.61	32.61	1	0		3.0188:Label:2H(3) (Trideuteration), 3.0101:Label:13C(3) (13C3 label for SILAC)	0		TRUE	TPK1	sp|P06244|KAPA_YEAST	cAMP-dependent protein kinase type 1
20180918_Lumos_RSLC6_Reiter_Ammerer_MFPL_onbead_Tpk1_1_1.48058.48058.2	FPPFFNEDVK		2	7531.71	620.306	620.921	1.2296	1.2316	1239.83	1238.6	0.1107	11.323	11.323	0.9981	0		Unknown	0		TRUE	TPK1	sp|P06244|KAPA_YEAST	cAMP-dependent protein kinase type 1
20180918_Lumos_RSLC6_Reiter_Ammerer_MFPL_onbead_Tpk1_1_1.48075.48075.2	YPEEDINYGVQGEDPYADLFR		2	7534.39	1245.56	1242.32	-6.4793	-6.4773	2482.62	2489.1	1.489e-05	19.726	16.015	1	0		Unknown	0		TRUE	TPK1	sp|P06244|KAPA_YEAST	cAMP-dependent protein kinase type 1
20180918_Lumos_RSLC6_Reiter_Ammerer_MFPL_onbead_Tpk1_1_1.48131.48131.4	NIETPYEPPIQQGQGDTSQFDKYPEEDINYGVQGEDPYADLFR		4	7543.56	1241.57	1241.82	1.0126	1.0146	4963.25	4962.24	3.231e-10	30.924	30.924	1	0		Unknown	0		TRUE	TPK1	sp|P06244|KAPA_YEAST	cAMP-dependent protein kinase type 1
20180918_Lumos_RSLC6_Reiter_Ammerer_MFPL_onbead_Tpk1_1_1.48230.48230.2	FPPFFNEDVK		2	7559.61	620.306	620.404	0.1966	0.1986	1238.79	1238.6	0.01351	11.924	7.408	0.9995	0		Unknown	0		TRUE	TPK1	sp|P06244|KAPA_YEAST	cAMP-dependent protein kinase type 1
20180918_Lumos_RSLC6_Reiter_Ammerer_MFPL_onbead_Tpk1_1_1.48258.48258.2	FPPFFNEDVK		2	7564.12	620.306	620.921	1.2296	1.2316	1239.83	1238.6	7.334	9.39	9.39	0.926	0		Unknown	0		TRUE	TPK1	sp|P06244|KAPA_YEAST	cAMP-dependent protein kinase type 1
20180918_Lumos_RSLC6_Reiter_Ammerer_MFPL_onbead_Tpk1_1_1.48360.48360.2	YPEEDINYGVQGEDPYADLFR		2	7580.73	1245.56	1242.32	-6.4756	-6.4736	2482.63	2489.1	1.635e-07	19.817	15.885	1	0		Unknown	0		TRUE	TPK1	sp|P06244|KAPA_YEAST	cAMP-dependent protein kinase type 1
20180918_Lumos_RSLC6_Reiter_Ammerer_MFPL_onbead_Tpk1_1_1.48387.48387.2	YPEEDINYGVQGEDPYADLFR		2	7584.99	1245.56	1242.07	-6.9827	-6.9807	2482.12	2489.1	2.872e-05	19.976	15.901	1	0		Unknown	0		TRUE	TPK1	sp|P06244|KAPA_YEAST	cAMP-dependent protein kinase type 1
20180918_Lumos_RSLC6_Reiter_Ammerer_MFPL_onbead_Tpk1_1_1.48477.48477.2	FPPFFNEDVK		2	7599.54	620.306	620.405	0.1982	0.2002	1238.8	1238.6	0.01337	11.838	11.838	0.9995	0		Unknown	0		TRUE	TPK1	sp|P06244|KAPA_YEAST	cAMP-dependent protein kinase type 1
20180918_Lumos_RSLC6_Reiter_Ammerer_MFPL_onbead_Tpk1_1_1.48667.48667.2	FPPFFNEDVK		2	7630.21	620.306	620.921	1.2295	1.2315	1239.83	1238.6	2.692	8.989	8.989	0.9456	0		Unknown	0		TRUE	TPK1	sp|P06244|KAPA_YEAST	cAMP-dependent protein kinase type 1
20180918_Lumos_RSLC6_Reiter_Ammerer_MFPL_onbead_Tpk1_1_1.48741.48741.2	YPEEDINYGVQGEDPYADLFR		2	7642.22	1245.56	1242.32	-6.4778	-6.4758	2482.62	2489.1	0.0006948	15.464	11.746	0.9979	0		Unknown	0		TRUE	TPK1	sp|P06244|KAPA_YEAST	cAMP-dependent protein kinase type 1
20180918_Lumos_RSLC6_Reiter_Ammerer_MFPL_onbead_Tpk1_1_1.49166.49166.3	FPPFFNEDVKDLLSR		3	7712.07	608.649	608.648	-0.0025	-0.0005	1822.92	1822.93	0.000103	22.936	13.665	1	0		Unknown	0		TRUE	TPK1	sp|P06244|KAPA_YEAST	cAMP-dependent protein kinase type 1
20180918_Lumos_RSLC6_Reiter_Ammerer_MFPL_onbead_Tpk1_1_1.49499.49499.2	YPEEDINYGVQGEDPYADLFR		2	7767.1	1245.56	1242.07	-6.9776	-6.9756	2482.12	2489.1	0.0001344	17.94	13.881	1	0		Unknown	0		TRUE	TPK1	sp|P06244|KAPA_YEAST	cAMP-dependent protein kinase type 1
20180918_Lumos_RSLC6_Reiter_Ammerer_MFPL_onbead_Tpk1_1_1.49584.49584.3	FPPFFNEDVKDLLSR		3	7781.1	608.649	608.982	1.0003	1.0023	1823.93	1822.93	3.847e-09	31.907	14.535	1	0		0.9970:Label:15N(1) (15N(1))	0		TRUE	TPK1	sp|P06244|KAPA_YEAST	cAMP-dependent protein kinase type 1
20180918_Lumos_RSLC6_Reiter_Ammerer_MFPL_onbead_Tpk1_1_1.49619.49619.2	YPEEDINYGVQGEDPYADLFR		2	7786.9	1245.56	1242.32	-6.4766	-6.4746	2482.63	2489.1	0.000145	18.155	13.872	1	0		Unknown	0		TRUE	TPK1	sp|P06244|KAPA_YEAST	cAMP-dependent protein kinase type 1
20180918_Lumos_RSLC6_Reiter_Ammerer_MFPL_onbead_Tpk1_1_1.49744.49744.2	FPPFFNEDVK		2	7807.48	620.306	620.406	0.2003	0.2023	1238.8	1238.6	1.693	11.214	11.214	0.964	0		Unknown	0		TRUE	TPK1	sp|P06244|KAPA_YEAST	cAMP-dependent protein kinase type 1
20180918_Lumos_RSLC6_Reiter_Ammerer_MFPL_onbead_Tpk1_1_1.49782.49782.4	NIETPYEPPIQQGQGDTSQFDKYPEEDINYGVQGEDPYADLFR		4	7814.08	1241.57	1242.07	1.998	2	4964.24	4962.24	2.698e-05	21.61	21.61	1	0		2.0042:Label:18O(1) (O18 Labeling), 1.9941:Label:15N(2) (15N(2)), 1.9979:Glu->Met (Glu->Met substitution)	0		TRUE	TPK1	sp|P06244|KAPA_YEAST	cAMP-dependent protein kinase type 1
20180918_Lumos_RSLC6_Reiter_Ammerer_MFPL_onbead_Tpk1_1_1.49874.49874.2	FPPFFNEDVK		2	7829.41	620.306	620.921	1.2296	1.2316	1239.83	1238.6	0.02471	12.527	8.63	0.9989	0		Unknown	0		TRUE	TPK1	sp|P06244|KAPA_YEAST	cAMP-dependent protein kinase type 1
20180918_Lumos_RSLC6_Reiter_Ammerer_MFPL_onbead_Tpk1_1_1.49878.49878.2	FPPFFNEDVK		2	7829.97	620.306	620.305	-0.0009	0.0011	1238.6	1238.6	0.6854	11.703	11.703	0.9847	0		Unknown	0		TRUE	TPK1	sp|P06244|KAPA_YEAST	cAMP-dependent protein kinase type 1
20180918_Lumos_RSLC6_Reiter_Ammerer_MFPL_onbead_Tpk1_1_1.49986.49986.4	NIETPYEPPIQQGQGDTSQFDKYPEEDINYGVQGEDPYADLFR		4	7849.2	1241.57	1242.32	3.0083	3.0103	4965.25	4962.24	1.64e-08	23.886	23.886	1	0		3.0188:Label:2H(3) (Trideuteration), 3.0101:Label:13C(3) (13C3 label for SILAC)	0		TRUE	TPK1	sp|P06244|KAPA_YEAST	cAMP-dependent protein kinase type 1
20180918_Lumos_RSLC6_Reiter_Ammerer_MFPL_onbead_Tpk1_1_1.50057.50057.2	YPEEDINYGVQGEDPYADLFR		2	7861.05	1245.56	1242.07	-6.968	-6.966	2482.13	2489.1	0.00281	15.937	11.853	1	0		-6.9622:Tyr->Arg (Tyr->Arg substitution)	0		TRUE	TPK1	sp|P06244|KAPA_YEAST	cAMP-dependent protein kinase type 1
20180918_Lumos_RSLC6_Reiter_Ammerer_MFPL_onbead_Tpk1_1_1.50075.50075.2	FPPFFNEDVK		2	7863.96	620.306	620.305	-0.0015	0.0005	1238.6	1238.6	0.591	11.84	11.84	0.9872	0		Unknown	0		TRUE	TPK1	sp|P06244|KAPA_YEAST	cAMP-dependent protein kinase type 1
20180918_Lumos_RSLC6_Reiter_Ammerer_MFPL_onbead_Tpk1_1_1.50096.50096.2	VTSGKYSLQDFQILR		2	7867.33	877.976	642.345	-471.261	-471.259	1282.68	1753.94	0.006128	17.256	17.249	0.8544	0		Unknown	0		TRUE	TPK1	sp|P06244|KAPA_YEAST	cAMP-dependent protein kinase type 1
20180918_Lumos_RSLC6_Reiter_Ammerer_MFPL_onbead_Tpk1_1_1.50203.50203.4	NIETPYEPPIQQGQGDTSQFDKYPEEDINYGVQGEDPYADLFR		4	7884.93	1241.57	1242.32	2.998	3	4965.24	4962.24	1.112e-06	22.032	22.032	1	0		2.9911:Label:15N(3) (15N(3))	0		TRUE	TPK1	sp|P06244|KAPA_YEAST	cAMP-dependent protein kinase type 1
20180918_Lumos_RSLC6_Reiter_Ammerer_MFPL_onbead_Tpk1_1_1.50236.50236.4	NIETPYEPPIQQGQGDTSQFDKYPEEDINYGVQGEDPYADLFR		4	7890.42	1241.57	1242.57	4.0146	4.0166	4966.26	4962.24	0.001869	16.733	15.137	0.9979	0		4.0134:Label:13C(4) (13C4 Methionine label), 4.0071:Label:13C(3)15N(1) (13C3 15N1 label for SILAC), 4.0085:Label:18O(2) (O18 label at both C-terminal oxygens), 4.0251:Label:2H(4) (4,4,5,5-D4 Lysine), 4.0222:Label:13C(1)2H(3) (SILAC)	0		TRUE	TPK1	sp|P06244|KAPA_YEAST	cAMP-dependent protein kinase type 1
20180918_Lumos_RSLC6_Reiter_Ammerer_MFPL_onbead_Tpk1_1_1.50317.50317.4	NIETPYEPPIQQGQGDTSQFDKYPEEDINYGVQGEDPYADLFR		4	7903.63	1241.57	1242.32	3.0117	3.0137	4965.25	4962.24	0.0001868	20.015	20.015	1	0		3.0188:Label:2H(3) (Trideuteration), 3.0101:Label:13C(3) (13C3 label for SILAC)	0		TRUE	TPK1	sp|P06244|KAPA_YEAST	cAMP-dependent protein kinase type 1
20180918_Lumos_RSLC6_Reiter_Ammerer_MFPL_onbead_Tpk1_1_1.50344.50344.4	NIETPYEPPIQQGQGDTSQFDKYPEEDINYGVQGEDPYADLFR		4	7908	1241.57	1241.82	1.0048	1.0068	4963.25	4962.24	4.78e-05	19.517	19.517	1	0		0.9970:Label:15N(1) (15N(1))	0		TRUE	TPK1	sp|P06244|KAPA_YEAST	cAMP-dependent protein kinase type 1
20180918_Lumos_RSLC6_Reiter_Ammerer_MFPL_onbead_Tpk1_1_1.50550.50550.4	NIETPYEPPIQQGQGDTSQFDKYPEEDINYGVQGEDPYADLFR		4	7941.94	1241.57	1242.57	4.0073	4.0093	4966.25	4962.24	0.001933	18.467	18.467	0.9977	0		4.0008:Label:13C(2)15N(2) (13C(2) 15N(2)), 4.0085:Label:18O(2) (O18 label at both C-terminal oxygens), 4.0134:Label:13C(4) (13C4 Methionine label), 4.0071:Label:13C(3)15N(1) (13C3 15N1 label for SILAC)	0		TRUE	TPK1	sp|P06244|KAPA_YEAST	cAMP-dependent protein kinase type 1
20180918_Lumos_RSLC6_Reiter_Ammerer_MFPL_onbead_Tpk1_1_1.50565.50565.4	NIETPYEPPIQQGQGDTSQFDKYPEEDINYGVQGEDPYADLFR		4	7944.45	1241.57	1242.32	3.0092	3.0112	4965.25	4962.24	1.235e-08	23.933	23.933	1	0		3.0188:Label:2H(3) (Trideuteration), 3.0101:Label:13C(3) (13C3 label for SILAC)	0		TRUE	TPK1	sp|P06244|KAPA_YEAST	cAMP-dependent protein kinase type 1
20180918_Lumos_RSLC6_Reiter_Ammerer_MFPL_onbead_Tpk1_1_1.50693.50693.4	NIETPYEPPIQQGQGDTSQFDKYPEEDINYGVQGEDPYADLFR		4	7965.44	1241.57	1242.07	2.0083	2.0103	4964.25	4962.24	2.417e-06	21.906	21.906	1	0		2.0042:Label:18O(1) (O18 Labeling), 2.0156:Pro->Val (Pro->Val substitution)	0		TRUE	TPK1	sp|P06244|KAPA_YEAST	cAMP-dependent protein kinase type 1
20180918_Lumos_RSLC6_Reiter_Ammerer_MFPL_onbead_Tpk1_1_1.50708.50708.2	YPEEDINYGVQGEDPYADLFR		2	7967.78	1245.56	1242.07	-6.9759	-6.9739	2482.13	2489.1	0.009496	17.814	13.887	0.9999	0		Unknown	0		TRUE	TPK1	sp|P06244|KAPA_YEAST	cAMP-dependent protein kinase type 1
20180918_Lumos_RSLC6_Reiter_Ammerer_MFPL_onbead_Tpk1_1_1.50799.50799.2	YPEEDINYGVQGEDPYADLFR		2	7982.75	1245.56	1242.07	-6.9783	-6.9763	2482.12	2489.1	0.0003411	17.819	13.884	1	0		Unknown	0		TRUE	TPK1	sp|P06244|KAPA_YEAST	cAMP-dependent protein kinase type 1
20180918_Lumos_RSLC6_Reiter_Ammerer_MFPL_onbead_Tpk1_1_1.50901.50901.2	YPEEDINYGVQGEDPYADLFR		2	7999.98	1245.56	1242.57	-5.982	-5.98	2483.12	2489.1	0.002529	14.406	14.406	0.9951	0		Unknown	0		TRUE	TPK1	sp|P06244|KAPA_YEAST	cAMP-dependent protein kinase type 1
20180918_Lumos_RSLC6_Reiter_Ammerer_MFPL_onbead_Tpk1_1_1.50969.50969.4	NIETPYEPPIQQGQGDTSQFDKYPEEDINYGVQGEDPYADLFR		4	8011.35	1241.57	1242.07	2.0126	2.0146	4964.25	4962.24	0.04197	14.144	14.144	0.9967	0		2.0156:Pro->Val (Pro->Val substitution)	0		TRUE	TPK1	sp|P06244|KAPA_YEAST	cAMP-dependent protein kinase type 1
20180918_Lumos_RSLC6_Reiter_Ammerer_MFPL_onbead_Tpk1_1_1.51009.51009.4	NIETPYEPPIQQGQGDTSQFDKYPEEDINYGVQGEDPYADLFR		4	8018.32	1241.57	1242.07	2.0161	2.0181	4964.26	4962.24	0.04869	16.75	16.75	0.9964	0		2.0156:Pro->Val (Pro->Val substitution)	0		TRUE	TPK1	sp|P06244|KAPA_YEAST	cAMP-dependent protein kinase type 1
20180918_Lumos_RSLC6_Reiter_Ammerer_MFPL_onbead_Tpk1_1_1.51146.51146.4	NIETPYEPPIQQGQGDTSQFDKYPEEDINYGVQGEDPYADLFR		4	8043.18	1241.57	1242.07	2.0034	2.0054	4964.24	4962.24	0.0005264	16.551	16.551	1	0		1.9979:Glu->Met (Glu->Met substitution), 2.0042:Label:18O(1) (O18 Labeling)	0		TRUE	TPK1	sp|P06244|KAPA_YEAST	cAMP-dependent protein kinase type 1
20180918_Lumos_RSLC6_Reiter_Ammerer_MFPL_onbead_Tpk1_1_2.03441.03441.3	SVEKEGGETQEKPK		3	621.327	515.93	585.617	209.061	209.063	1753.83	1544.77	0.003331	19.001	13.365	0.7313	0		Unknown	0		TRUE	TPK1	sp|P06244|KAPA_YEAST	cAMP-dependent protein kinase type 1
20180918_Lumos_RSLC6_Reiter_Ammerer_MFPL_onbead_Tpk1_1_2.03548.03548.3	SVEKEGGETQEKPK		3	638.453	515.93	515.929	-0.0015	0.0008	1544.77	1544.77	3.933e-10	45.501	30.757	1	0		Unknown	0		TRUE	TPK1	sp|P06244|KAPA_YEAST	cAMP-dependent protein kinase type 1
20180918_Lumos_RSLC6_Reiter_Ammerer_MFPL_onbead_Tpk1_1_2.03553.03553.2	SVEKEGGETQEKPK		2	639.353	773.391	773.391	-0.0014	0.0009	1544.77	1544.77	2.008e-13	36.139	19.521	1	0		Unknown	0		TRUE	TPK1	sp|P06244|KAPA_YEAST	cAMP-dependent protein kinase type 1
20180918_Lumos_RSLC6_Reiter_Ammerer_MFPL_onbead_Tpk1_1_2.03564.03564.4	SVEKEGGETQEKPK		4	640.987	387.199	387.198	-0.0041	-0.0018	1544.76	1544.77	1.006e-07	32.468	30.837	1	0		Unknown	0		TRUE	TPK1	sp|P06244|KAPA_YEAST	cAMP-dependent protein kinase type 1
20180918_Lumos_RSLC6_Reiter_Ammerer_MFPL_onbead_Tpk1_1_2.03581.03581.3	EGGETQEKPK		3	643.839	368.184	453.896	257.136	257.138	1358.67	1101.53	0.001491	21.938	21.125	0.9943	0		Unknown	0		TRUE	TPK1	sp|P06244|KAPA_YEAST	cAMP-dependent protein kinase type 1
20180918_Lumos_RSLC6_Reiter_Ammerer_MFPL_onbead_Tpk1_1_2.03585.03585.2	EGGETQEKPK		2	644.468	551.772	680.34	257.136	257.138	1358.67	1101.53	7.056e-05	20.952	19.847	0.9953	0		Unknown	0		TRUE	TPK1	sp|P06244|KAPA_YEAST	cAMP-dependent protein kinase type 1
20180918_Lumos_RSLC6_Reiter_Ammerer_MFPL_onbead_Tpk1_1_2.03730.03730.3	SVEKEGGETQEKPK		3	669.21	515.93	515.929	-0.0015	0.0008	1544.77	1544.77	1.118e-09	48.107	33.424	1	0		Unknown	0		TRUE	TPK1	sp|P06244|KAPA_YEAST	cAMP-dependent protein kinase type 1
20180918_Lumos_RSLC6_Reiter_Ammerer_MFPL_onbead_Tpk1_1_2.03736.03736.2	SVEKEGGETQEKPK		2	670.198	773.391	773.391	-0.0017	0.0006	1544.77	1544.77	1.105e-13	36.165	19.534	1	0		Unknown	0		TRUE	TPK1	sp|P06244|KAPA_YEAST	cAMP-dependent protein kinase type 1
20180918_Lumos_RSLC6_Reiter_Ammerer_MFPL_onbead_Tpk1_1_2.03773.03773.4	SVEKEGGETQEKPK		4	676.198	387.199	387.198	-0.0051	-0.0028	1544.76	1544.77	0.001283	22.366	21.662	0.9999	0		Unknown	0		TRUE	TPK1	sp|P06244|KAPA_YEAST	cAMP-dependent protein kinase type 1
20180918_Lumos_RSLC6_Reiter_Ammerer_MFPL_onbead_Tpk1_1_2.03888.03888.3	LKQVEHTNDER		3	694.914	456.9	456.9	-0.0019	0.0004	1367.68	1367.68	9.152e-06	32.037	26.399	0.9999	0		Unknown	0		FALSE	TPK3	sp|P05986|KAPC_YEAST	cAMP-dependent protein kinase type 3	sp|P06244|KAPA_YEAST
20180918_Lumos_RSLC6_Reiter_Ammerer_MFPL_onbead_Tpk1_1_2.03903.03903.2	LKQVEHTNDER		2	697.229	684.847	684.846	-0.0015	0.0008	1367.68	1367.68	8.048e-11	30.005	15.46	1	0		Unknown	0		FALSE	TPK3	sp|P05986|KAPC_YEAST	cAMP-dependent protein kinase type 3	sp|P06244|KAPA_YEAST
20180918_Lumos_RSLC6_Reiter_Ammerer_MFPL_onbead_Tpk1_1_2.03925.03925.2	LKQVEHTNDER		2	700.87	684.847	706.828	43.9625	43.9648	1411.64	1367.68	0.6307	11.814	9.622	0.2876	0		Unknown	0		FALSE	TPK3	sp|P05986|KAPC_YEAST	cAMP-dependent protein kinase type 3	sp|P06244|KAPA_YEAST
20180918_Lumos_RSLC6_Reiter_Ammerer_MFPL_onbead_Tpk1_1_2.03929.03929.2	QVEHTNDER		2	701.488	564.257	564.257	-0.0009	0.0014	1126.5	1126.5	3.816e-05	23.497	15.871	0.9999	0		Unknown	0		FALSE	TPK3	sp|P05986|KAPC_YEAST	cAMP-dependent protein kinase type 3	sp|P06245|KAPB_YEAST, sp|P06244|KAPA_YEAST
20180918_Lumos_RSLC6_Reiter_Ammerer_MFPL_onbead_Tpk1_1_2.03941.03941.2	LKQVEHTNDER		2	703.621	684.847	628.304	-113.086	-113.083	1254.59	1367.68	0.01124	15.375	15.375	0.6647	0		Unknown	0		FALSE	TPK3	sp|P05986|KAPC_YEAST	cAMP-dependent protein kinase type 3	sp|P06244|KAPA_YEAST
20180918_Lumos_RSLC6_Reiter_Ammerer_MFPL_onbead_Tpk1_1_2.03951.03951.3	QVEHTNDER		3	705.709	376.507	419.205	128.094	128.096	1254.59	1126.5	0.0006038	24.795	23.176	0.9984	0		128.0950:Lys (Addition of lysine due to transpeptidation)	0		FALSE	TPK3	sp|P05986|KAPC_YEAST	cAMP-dependent protein kinase type 3	sp|P06245|KAPB_YEAST, sp|P06244|KAPA_YEAST
20180918_Lumos_RSLC6_Reiter_Ammerer_MFPL_onbead_Tpk1_1_2.03967.03967.3	LKQVEHTNDER		3	709.481	456.9	462.904	18.0094	18.0117	1385.69	1367.68	1.395e-06	27.659	19.86	0.9978	0		Unknown	0		FALSE	TPK3	sp|P05986|KAPC_YEAST	cAMP-dependent protein kinase type 3	sp|P06244|KAPA_YEAST
20180918_Lumos_RSLC6_Reiter_Ammerer_MFPL_onbead_Tpk1_1_2.03968.03968.3	SVEKEGGETQEKPK		3	709.75	515.93	516.265	1.0042	1.0065	1545.77	1544.77	8.506e-07	32.114	27.841	1	0		0.9970:Label:15N(1) (15N(1))	0		TRUE	TPK1	sp|P06244|KAPA_YEAST	cAMP-dependent protein kinase type 1
20180918_Lumos_RSLC6_Reiter_Ammerer_MFPL_onbead_Tpk1_1_2.03986.03986.3	SVEKEGGETQEKPK		3	713.469	515.93	534.937	57.0201	57.0224	1601.79	1544.77	9.691e-08	34.536	33.531	1	0		57.0215:Carbamidomethyl (Iodoacetamide derivative), 57.0215:Ala->Gln (Ala->Gln substitution), 57.0215:Gly->Asn (Gly->Asn substitution), 57.0215:Gly (Addition of Glycine)	0		TRUE	TPK1	sp|P06244|KAPA_YEAST	cAMP-dependent protein kinase type 1
20180918_Lumos_RSLC6_Reiter_Ammerer_MFPL_onbead_Tpk1_1_2.04060.04060.3	LKQVEHTNDER		3	725.596	456.9	456.9	-0.0017	0.0006	1367.68	1367.68	5.31e-06	31.568	25.358	0.9999	0		Unknown	0		FALSE	TPK3	sp|P05986|KAPC_YEAST	cAMP-dependent protein kinase type 3	sp|P06244|KAPA_YEAST
20180918_Lumos_RSLC6_Reiter_Ammerer_MFPL_onbead_Tpk1_1_2.04071.04071.2	LKQVEHTNDER		2	727.398	684.847	684.846	-0.0017	0.0006	1367.68	1367.68	1.152e-10	30.004	16.379	1	0		Unknown	0		FALSE	TPK3	sp|P05986|KAPC_YEAST	cAMP-dependent protein kinase type 3	sp|P06244|KAPA_YEAST
20180918_Lumos_RSLC6_Reiter_Ammerer_MFPL_onbead_Tpk1_1_2.04143.04143.3	SVEKEGGETQEKPK		3	739.297	515.93	516.264	1.0023	1.0046	1545.77	1544.77	1.03e-08	37.722	33.308	1	0		0.9970:Label:15N(1) (15N(1))	0		TRUE	TPK1	sp|P06244|KAPA_YEAST	cAMP-dependent protein kinase type 1
20180918_Lumos_RSLC6_Reiter_Ammerer_MFPL_onbead_Tpk1_1_2.04225.04225.3	LKQVEHTNDER		3	756.307	456.9	456.9	-0.0015	0.0008	1367.68	1367.68	9.788e-06	32.427	26.956	0.9999	0		Unknown	0		FALSE	TPK3	sp|P05986|KAPC_YEAST	cAMP-dependent protein kinase type 3	sp|P06244|KAPA_YEAST
20180918_Lumos_RSLC6_Reiter_Ammerer_MFPL_onbead_Tpk1_1_2.04236.04236.2	LKQVEHTNDER		2	758.043	684.847	684.846	-0.0015	0.0008	1367.68	1367.68	3.695e-11	32.321	18.64	1	0		Unknown	0		FALSE	TPK3	sp|P05986|KAPC_YEAST	cAMP-dependent protein kinase type 3	sp|P06244|KAPA_YEAST
20180918_Lumos_RSLC6_Reiter_Ammerer_MFPL_onbead_Tpk1_1_2.04242.04242.3	SVEKEGGETQEKPK		3	759.062	515.93	515.93	-0.0011	0.0012	1544.77	1544.77	1.469e-07	43.406	33.046	1	0		Unknown	0		TRUE	TPK1	sp|P06244|KAPA_YEAST	cAMP-dependent protein kinase type 1
20180918_Lumos_RSLC6_Reiter_Ammerer_MFPL_onbead_Tpk1_1_2.04305.04305.3	SVEKEGGETQEKPK		3	770.096	515.93	657.308	424.133	424.135	1968.9	1544.77	5.065e-08	32.592	15.974	1	0		Unknown	0		TRUE	TPK1	sp|P06244|KAPA_YEAST	cAMP-dependent protein kinase type 1
20180918_Lumos_RSLC6_Reiter_Ammerer_MFPL_onbead_Tpk1_1_2.04415.04415.3	LKQVEHTNDER		3	788.316	456.9	457.228	0.9824	0.9847	1368.66	1367.68	2.467e-06	33.065	27.876	0.9999	0		0.9840:Gln->Glu (Gln->Glu substitution), 0.9840:Deamidated (Deamidation), 0.9840:Asn->Asp (Asn->Asp substitution)	0		FALSE	TPK3	sp|P05986|KAPC_YEAST	cAMP-dependent protein kinase type 3	sp|P06244|KAPA_YEAST
20180918_Lumos_RSLC6_Reiter_Ammerer_MFPL_onbead_Tpk1_1_2.04417.04417.2	LKQVEHTNDER		2	788.748	684.847	685.84	1.9854	1.9877	1369.66	1367.68	0.000217	21.156	14.676	0.999	0		1.9941:Label:15N(2) (15N(2)), 1.9793:Val->Thr (Val->Thr substitution)	0		FALSE	TPK3	sp|P05986|KAPC_YEAST	cAMP-dependent protein kinase type 3	sp|P06244|KAPA_YEAST
20180918_Lumos_RSLC6_Reiter_Ammerer_MFPL_onbead_Tpk1_1_2.04444.04444.3	SVEKEGGETQEKPK		3	793.115	515.93	515.93	-0.0014	0.0009	1544.77	1544.77	3.094e-09	34.39	27.601	1	0		Unknown	0		TRUE	TPK1	sp|P06244|KAPA_YEAST	cAMP-dependent protein kinase type 1
20180918_Lumos_RSLC6_Reiter_Ammerer_MFPL_onbead_Tpk1_1_2.04484.04484.3	SVEKEGGETQEKPK		3	799.603	515.93	542.585	79.9647	79.967	1624.73	1544.77	1.17e-07	33.552	33.436	1	0		79.9663:Phospho (Phosphorylation)	0		TRUE	TPK1	sp|P06244|KAPA_YEAST	cAMP-dependent protein kinase type 1
20180918_Lumos_RSLC6_Reiter_Ammerer_MFPL_onbead_Tpk1_1_2.04487.04487.2	SVEKEGGETQEKPK	S[167]VEKEGGETQEKPK	2	800.086	813.375	813.374	-0.002	0.0003	1624.73	1624.73	3.359e-07	22.799	19.53	1	0	1S(79.9663)	Unknown	0		TRUE	TPK1	sp|P06244|KAPA_YEAST	cAMP-dependent protein kinase type 1
20180918_Lumos_RSLC6_Reiter_Ammerer_MFPL_onbead_Tpk1_1_2.04602.04602.2	LKQVEHTNDER		2	818.597	684.847	685.84	1.9853	1.9876	1369.66	1367.68	2.106e-05	22.727	13.984	0.9998	0		1.9941:Label:15N(2) (15N(2)), 1.9793:Val->Thr (Val->Thr substitution)	0		FALSE	TPK3	sp|P05986|KAPC_YEAST	cAMP-dependent protein kinase type 3	sp|P06244|KAPA_YEAST
20180918_Lumos_RSLC6_Reiter_Ammerer_MFPL_onbead_Tpk1_1_2.04612.04612.3	LKQVEHTNDER		3	820.134	456.9	456.9	-0.002	0.0003	1367.68	1367.68	1.89e-06	30.592	25.388	0.9999	0		Unknown	0		FALSE	TPK3	sp|P05986|KAPC_YEAST	cAMP-dependent protein kinase type 3	sp|P06244|KAPA_YEAST
20180918_Lumos_RSLC6_Reiter_Ammerer_MFPL_onbead_Tpk1_1_2.04626.04626.2	LKQVEHTNDER		2	822.421	684.847	685.338	0.9828	0.9851	1368.66	1367.68	3.59e-08	27.614	16.817	1	0		0.9840:Deamidated (Deamidation), 0.9840:Asn->Asp (Asn->Asp substitution), 0.9840:Gln->Glu (Gln->Glu substitution)	0		FALSE	TPK3	sp|P05986|KAPC_YEAST	cAMP-dependent protein kinase type 3	sp|P06244|KAPA_YEAST
20180918_Lumos_RSLC6_Reiter_Ammerer_MFPL_onbead_Tpk1_1_2.04725.04725.3	LKQVEHTNDER		3	838.308	456.9	457.228	0.9824	0.9847	1368.66	1367.68	1.276e-06	32.989	27.841	1	0		0.9840:Asn->Asp (Asn->Asp substitution), 0.9840:Gln->Glu (Gln->Glu substitution), 0.9840:Deamidated (Deamidation)	0		FALSE	TPK3	sp|P05986|KAPC_YEAST	cAMP-dependent protein kinase type 3	sp|P06244|KAPA_YEAST
20180918_Lumos_RSLC6_Reiter_Ammerer_MFPL_onbead_Tpk1_1_2.04813.04813.3	LKQVEHTNDER		3	852.463	456.9	456.9	-0.0015	0.0008	1367.68	1367.68	2.089e-05	30.721	25.618	0.9998	0		Unknown	0		FALSE	TPK3	sp|P05986|KAPC_YEAST	cAMP-dependent protein kinase type 3	sp|P06244|KAPA_YEAST
20180918_Lumos_RSLC6_Reiter_Ammerer_MFPL_onbead_Tpk1_1_2.04817.04817.2	LKQVEHTNDER		2	853.081	684.847	684.846	-0.0021	0.0002	1367.68	1367.68	2.397e-07	28.448	15.742	1	0		Unknown	0		FALSE	TPK3	sp|P05986|KAPC_YEAST	cAMP-dependent protein kinase type 3	sp|P06244|KAPA_YEAST
20180918_Lumos_RSLC6_Reiter_Ammerer_MFPL_onbead_Tpk1_1_2.04853.04853.3	SVEKEGGETQEKPK		3	858.918	515.93	515.929	-0.0021	0.0002	1544.77	1544.77	0.001045	19.893	17.798	0.9997	0		Unknown	0		TRUE	TPK1	sp|P06244|KAPA_YEAST	cAMP-dependent protein kinase type 1
20180918_Lumos_RSLC6_Reiter_Ammerer_MFPL_onbead_Tpk1_1_2.05082.05082.3	LKQVEHTNDER		3	895.484	456.9	456.9	-0.0024	-0.0001	1367.68	1367.68	4.891e-06	32.255	26.934	0.9999	0		Unknown	0		FALSE	TPK3	sp|P05986|KAPC_YEAST	cAMP-dependent protein kinase type 3	sp|P06244|KAPA_YEAST
20180918_Lumos_RSLC6_Reiter_Ammerer_MFPL_onbead_Tpk1_1_2.05195.05195.2	GETSERETTATESGNESK		2	913.923	956.922	957.42	0.997	0.9993	1912.83	1911.83	5.318e-07	48.149	23.971	1	0		0.9970:Label:15N(1) (15N(1))	0		TRUE	TPK1	sp|P06244|KAPA_YEAST	cAMP-dependent protein kinase type 1
20180918_Lumos_RSLC6_Reiter_Ammerer_MFPL_onbead_Tpk1_1_2.05198.05198.3	GETSERETTATESGNESK		3	914.319	638.284	638.617	1.0009	1.0032	1912.83	1911.83	8.278e-05	47.607	34.993	1	0		0.9970:Label:15N(1) (15N(1))	0		TRUE	TPK1	sp|P06244|KAPA_YEAST	cAMP-dependent protein kinase type 1
20180918_Lumos_RSLC6_Reiter_Ammerer_MFPL_onbead_Tpk1_1_2.05351.05351.2	LKQVEHTNDER		2	938.821	684.847	684.847	0.0001	0.0024	1367.68	1367.68	4.935e-07	24.963	14.972	1	0		Unknown	0		FALSE	TPK3	sp|P05986|KAPC_YEAST	cAMP-dependent protein kinase type 3	sp|P06244|KAPA_YEAST
20180918_Lumos_RSLC6_Reiter_Ammerer_MFPL_onbead_Tpk1_1_2.05372.05372.3	LKQVEHTNDER		3	942.167	456.9	456.9	-0.0021	0.0002	1367.68	1367.68	1.683e-06	30.86	25.764	0.9999	0		Unknown	0		FALSE	TPK3	sp|P05986|KAPC_YEAST	cAMP-dependent protein kinase type 3	sp|P06244|KAPA_YEAST
20180918_Lumos_RSLC6_Reiter_Ammerer_MFPL_onbead_Tpk1_1_2.05769.05769.2	LKQVEHTNDER		2	1005.41	684.847	685.348	1.0028	1.0051	1368.68	1367.68	0.001031	16.288	12.13	0.9996	0		0.9970:Label:15N(1) (15N(1))	0		FALSE	TPK3	sp|P05986|KAPC_YEAST	cAMP-dependent protein kinase type 3	sp|P06244|KAPA_YEAST
20180918_Lumos_RSLC6_Reiter_Ammerer_MFPL_onbead_Tpk1_1_2.05827.05827.2	LKQVEHTNDER		2	1014.71	684.847	684.826	-0.041	-0.0387	1367.64	1367.68	2.702	10.844	9.068	0.6785	0		-0.0364:Lys->Gln (Lys->Gln substitution)	0		FALSE	TPK3	sp|P05986|KAPC_YEAST	cAMP-dependent protein kinase type 3	sp|P06244|KAPA_YEAST
20180918_Lumos_RSLC6_Reiter_Ammerer_MFPL_onbead_Tpk1_1_2.05954.05954.2	QGEESQKGETSER		2	1035.16	732.832	724.318	-17.0277	-17.0254	1446.62	1463.65	0.007125	14.421	12.273	0.9723	0		-17.0265:Gln->pyro-Glu (Pyro-glu from Q), -17.0265:Ammonia-loss (Loss of ammonia)	0		TRUE	TPK1	sp|P06244|KAPA_YEAST	cAMP-dependent protein kinase type 1
20180918_Lumos_RSLC6_Reiter_Ammerer_MFPL_onbead_Tpk1_1_2.06247.06247.2	SVEKEGGETQEKPK		2	1081.65	773.391	795.394	44.0062	44.0085	1588.77	1544.77	2.462e-09	33.64	25.197	1	0		44.0085:Ser->Met (Ser->Met substitution), 44.0173:Acetyl:13C(2) (heavy acetylation), 44.0085:Delta:H(4)C(2)O(-1)S(1) (S-Ethylcystine from Serine)	0		TRUE	TPK1	sp|P06244|KAPA_YEAST	cAMP-dependent protein kinase type 1
20180918_Lumos_RSLC6_Reiter_Ammerer_MFPL_onbead_Tpk1_1_2.06843.06843.2	SVEKEGGETQEKPK		2	1177.96	773.391	794.893	43.0039	43.0062	1587.77	1544.77	2.647e-08	34.906	17.705	1	0		43.0058:Carbamyl (Carbamylation), 43.0058:Ala->Asn (Ala->Asn substitution)	0		TRUE	TPK1	sp|P06244|KAPA_YEAST	cAMP-dependent protein kinase type 1
20180918_Lumos_RSLC6_Reiter_Ammerer_MFPL_onbead_Tpk1_1_2.06876.06876.2	ETTATESGNESKSVEK	ETTATESGNES[167]KSVEK	2	1183.35	888.88	888.881	0.0008	0.0031	1775.75	1775.75	2.836	15.708	14.354	0.673	0	11S(79.9663)	Unknown	0		TRUE	TPK1	sp|P06244|KAPA_YEAST	cAMP-dependent protein kinase type 1
20180918_Lumos_RSLC6_Reiter_Ammerer_MFPL_onbead_Tpk1_1_2.06906.06906.3	SVEKEGGETQEKPK		3	1188.24	515.93	530.265	43.0041	43.0064	1587.77	1544.77	0.0006589	24.04	19.603	0.9974	0		43.0058:Carbamyl (Carbamylation), 43.0058:Ala->Asn (Ala->Asn substitution)	0		TRUE	TPK1	sp|P06244|KAPA_YEAST	cAMP-dependent protein kinase type 1
20180918_Lumos_RSLC6_Reiter_Ammerer_MFPL_onbead_Tpk1_1_2.07105.07105.3	SVEKEGGETQEKPK		3	1220.09	515.93	577.276	184.038	184.04	1728.81	1544.77	2.936e-05	28.775	24.704	0.9949	0		Unknown	0		TRUE	TPK1	sp|P06244|KAPA_YEAST	cAMP-dependent protein kinase type 1
20180918_Lumos_RSLC6_Reiter_Ammerer_MFPL_onbead_Tpk1_1_2.07169.07169.2	LKQVEHTNDER		2	1230.24	684.847	706.349	43.0049	43.0072	1410.68	1367.68	3.142e-08	31.104	19.957	1	0		43.0058:Carbamyl (Carbamylation), 43.0170:Xle->Arg (Leu/Ile->Arg substitution), 43.0058:Ala->Asn (Ala->Asn substitution)	0		FALSE	TPK3	sp|P05986|KAPC_YEAST	cAMP-dependent protein kinase type 3	sp|P06244|KAPA_YEAST
20180918_Lumos_RSLC6_Reiter_Ammerer_MFPL_onbead_Tpk1_1_2.07172.07172.3	LKQVEHTNDER		3	1230.75	456.9	471.235	43.0044	43.0067	1410.68	1367.68	0.001801	27.536	27.068	0.994	0		43.0058:Carbamyl (Carbamylation), 43.0058:Ala->Asn (Ala->Asn substitution)	0		FALSE	TPK3	sp|P05986|KAPC_YEAST	cAMP-dependent protein kinase type 3	sp|P06244|KAPA_YEAST
20180918_Lumos_RSLC6_Reiter_Ammerer_MFPL_onbead_Tpk1_1_2.07369.07369.2	QFIAQAR		2	1263.93	417.235	481.282	128.094	128.096	960.549	832.456	2.323	13.816	13.692	0.2989	0		128.0950:Lys (Addition of lysine due to transpeptidation)	0		TRUE	TPK1	sp|P06244|KAPA_YEAST	cAMP-dependent protein kinase type 1
20180918_Lumos_RSLC6_Reiter_Ammerer_MFPL_onbead_Tpk1_1_2.07406.07406.2	LKQVEHTNDER		2	1269.85	684.847	685.25	0.8053	0.8076	1368.48	1367.68	3.05	12.864	12.864	0.7414	0		Unknown	0		FALSE	TPK3	sp|P05986|KAPC_YEAST	cAMP-dependent protein kinase type 3	sp|P06244|KAPA_YEAST
20180918_Lumos_RSLC6_Reiter_Ammerer_MFPL_onbead_Tpk1_1_2.10175.10175.2	GETSERETTATESGNESK		2	1718.33	956.922	842.112	-229.621	-229.619	1682.21	1911.83	0.0003608	22.344	15.633	0.8836	0		Unknown	0		TRUE	TPK1	sp|P06244|KAPA_YEAST	cAMP-dependent protein kinase type 1
20180918_Lumos_RSLC6_Reiter_Ammerer_MFPL_onbead_Tpk1_1_2.11660.11660.3	QPHVTYYNEEQYK		3	1945.44	566.93	727.692	482.285	482.288	2180.05	1697.77	5.147e-06	26.868	15.284	0.9949	0		Unknown	0		TRUE	TPK1	sp|P06244|KAPA_YEAST	cAMP-dependent protein kinase type 1
20180918_Lumos_RSLC6_Reiter_Ammerer_MFPL_onbead_Tpk1_1_2.11662.11662.2	QFIAQAR		2	1945.68	417.235	417.234	-0.0015	0.0008	832.454	832.456	0.9528	14.541	12.455	0.9707	0		Unknown	0		TRUE	TPK1	sp|P06244|KAPA_YEAST	cAMP-dependent protein kinase type 1
20180918_Lumos_RSLC6_Reiter_Ammerer_MFPL_onbead_Tpk1_1_2.11852.11852.2	QFIAQAR		2	1975.83	417.235	417.235	-0.0011	0.0012	832.454	832.456	0.8852	14.602	12.338	0.973	0		Unknown	0		TRUE	TPK1	sp|P06244|KAPA_YEAST	cAMP-dependent protein kinase type 1
20180918_Lumos_RSLC6_Reiter_Ammerer_MFPL_onbead_Tpk1_1_2.12058.12058.2	QFIAQAR		2	2007.1	417.235	417.234	-0.0014	0.0009	832.454	832.456	0.1003	14.593	14.057	0.9977	0		Unknown	0		TRUE	TPK1	sp|P06244|KAPA_YEAST	cAMP-dependent protein kinase type 1
20180918_Lumos_RSLC6_Reiter_Ammerer_MFPL_onbead_Tpk1_1_2.12073.12073.3	SQRFPNPVAK		3	2009.47	381.88	381.88	-0.0021	0.0002	1142.62	1142.62	3.276	22.175	21.369	0.6295	0		Unknown	0		FALSE	TPK3	sp|P05986|KAPC_YEAST	cAMP-dependent protein kinase type 3	sp|P06244|KAPA_YEAST, sp|P06245|KAPB_YEAST
20180918_Lumos_RSLC6_Reiter_Ammerer_MFPL_onbead_Tpk1_1_2.12160.12160.2	SQRFPNPVAK		2	2023.36	572.317	572.316	-0.0014	0.0009	1142.62	1142.62	0.0004449	18.523	18.523	0.9996	0		Unknown	0		FALSE	TPK3	sp|P05986|KAPC_YEAST	cAMP-dependent protein kinase type 3	sp|P06245|KAPB_YEAST, sp|P06244|KAPA_YEAST
20180918_Lumos_RSLC6_Reiter_Ammerer_MFPL_onbead_Tpk1_1_2.12253.12253.2	QFIAQAR		2	2037.21	417.235	417.235	-0.0012	0.0011	832.454	832.456	0.08453	14.644	14.053	0.9979	0		Unknown	0		TRUE	TPK1	sp|P06244|KAPA_YEAST	cAMP-dependent protein kinase type 1
20180918_Lumos_RSLC6_Reiter_Ammerer_MFPL_onbead_Tpk1_1_2.12270.12270.3	SQRFPNPVAK		3	2039.96	381.88	381.88	-0.0017	0.0006	1142.62	1142.62	2.757e-08	36.846	18.593	1	0		Unknown	0		FALSE	TPK3	sp|P05986|KAPC_YEAST	cAMP-dependent protein kinase type 3	sp|P06245|KAPB_YEAST, sp|P06244|KAPA_YEAST
20180918_Lumos_RSLC6_Reiter_Ammerer_MFPL_onbead_Tpk1_1_2.12362.12362.2	SQRFPNPVAK		2	2054.46	572.317	572.317	-0.0011	0.0012	1142.62	1142.62	1.961e-07	25.705	10.444	1	0		Unknown	0		FALSE	TPK3	sp|P05986|KAPC_YEAST	cAMP-dependent protein kinase type 3	sp|P06244|KAPA_YEAST, sp|P06245|KAPB_YEAST
20180918_Lumos_RSLC6_Reiter_Ammerer_MFPL_onbead_Tpk1_1_2.12448.12448.4	EGGETQEKPKQPHVTYYNEEQYK	EGGET[181]QEKPKQPHVTYYNEEQYK	4	2067.25	716.321	807.639	365.275	365.277	3226.53	2861.25	3.204e-08	30.299	29.065	1	0	5T(79.9663)	Unknown	0		FALSE	TPK1	sp|P06244|KAPA_YEAST	cAMP-dependent protein kinase type 1
20180918_Lumos_RSLC6_Reiter_Ammerer_MFPL_onbead_Tpk1_1_2.12463.12463.3	EGGETQEKPKQPHVTYYNEEQYK		3	2069.42	928.103	1076.18	444.241	444.243	3225.53	2781.29	5.584e-10	40.374	31.058	1	0		Unknown	0		TRUE	TPK1	sp|P06244|KAPA_YEAST	cAMP-dependent protein kinase type 1
20180918_Lumos_RSLC6_Reiter_Ammerer_MFPL_onbead_Tpk1_1_2.12482.12482.3	SQRFPNPVAK		3	2072.28	381.88	381.88	-0.0017	0.0006	1142.62	1142.62	5.921e-08	36.911	20.909	1	0		Unknown	0		FALSE	TPK3	sp|P05986|KAPC_YEAST	cAMP-dependent protein kinase type 3	sp|P06244|KAPA_YEAST, sp|P06245|KAPB_YEAST
20180918_Lumos_RSLC6_Reiter_Ammerer_MFPL_onbead_Tpk1_1_2.12494.12494.5	EGGETQEKPKQPHVTYYNEEQYK		5	2073.88	557.265	646.112	444.237	444.239	3225.52	2781.29	0.009278	21.061	17.977	0.5343	0		Unknown	0		TRUE	TPK1	sp|P06244|KAPA_YEAST	cAMP-dependent protein kinase type 1
20180918_Lumos_RSLC6_Reiter_Ammerer_MFPL_onbead_Tpk1_1_2.12530.12530.2	QPHVTYYNEEQYK		2	2079.48	849.891	737.335	-225.113	-225.111	1472.66	1697.77	0.0001449	20.327	15.099	0.9977	0		Unknown	0		TRUE	TPK1	sp|P06244|KAPA_YEAST	cAMP-dependent protein kinase type 1
20180918_Lumos_RSLC6_Reiter_Ammerer_MFPL_onbead_Tpk1_1_2.12551.12551.3	EGGETQEKPKQPHVTYYNEEQYK		3	2082.84	928.103	1076.52	445.243	445.246	3226.53	2781.29	2.465e-09	40.582	36.693	1	0		Unknown	0		TRUE	TPK1	sp|P06244|KAPA_YEAST	cAMP-dependent protein kinase type 1
20180918_Lumos_RSLC6_Reiter_Ammerer_MFPL_onbead_Tpk1_1_2.12604.12604.3	EGGETQEKPKQPHVTYYNEEQYK		3	2091.08	928.103	1076.85	446.243	446.245	3227.53	2781.29	7.039e-06	34.255	33.483	0.9941	0		Unknown	0		TRUE	TPK1	sp|P06244|KAPA_YEAST	cAMP-dependent protein kinase type 1
20180918_Lumos_RSLC6_Reiter_Ammerer_MFPL_onbead_Tpk1_1_2.12625.12625.4	EGGETQEKPKQPHVTYYNEEQYK	EGGET[181]QEKPKQPHVTYYNEEQYK	4	2094.39	716.321	807.639	365.273	365.275	3226.53	2861.25	1.899e-07	30.184	28.99	1	0	5T(79.9663)	Unknown	0		FALSE	TPK1	sp|P06244|KAPA_YEAST	cAMP-dependent protein kinase type 1
20180918_Lumos_RSLC6_Reiter_Ammerer_MFPL_onbead_Tpk1_1_2.12663.12663.4	EGGETQEKPKQPHVTYYNEEQYK	EGGET[181]QEKPKQPHVTYYNEEQYK	4	2100.27	716.321	807.89	366.276	366.279	3227.53	2861.25	5.868e-08	29.929	27.252	1	0	5T(79.9663)	Unknown	0		FALSE	TPK1	sp|P06244|KAPA_YEAST	cAMP-dependent protein kinase type 1
20180918_Lumos_RSLC6_Reiter_Ammerer_MFPL_onbead_Tpk1_1_2.12689.12689.3	SQRFPNPVAK		3	2103.93	381.88	381.88	-0.0014	0.0009	1142.62	1142.62	0.002845	24.508	18.751	0.9993	0		Unknown	0		FALSE	TPK3	sp|P05986|KAPC_YEAST	cAMP-dependent protein kinase type 3	sp|P06244|KAPA_YEAST, sp|P06245|KAPB_YEAST
20180918_Lumos_RSLC6_Reiter_Ammerer_MFPL_onbead_Tpk1_1_2.12742.12742.2	QPHVTYYNEEQYK		2	2111.8	849.891	737.335	-225.113	-225.111	1472.66	1697.77	0.001851	19.597	14.358	0.9968	0		Unknown	0		TRUE	TPK1	sp|P06244|KAPA_YEAST	cAMP-dependent protein kinase type 1
20180918_Lumos_RSLC6_Reiter_Ammerer_MFPL_onbead_Tpk1_1_2.12780.12780.3	QPHVTYYNEEQYK		3	2117.8	566.93	641.979	225.145	225.148	1922.91	1697.77	6.261e-05	28.781	18.619	0.9947	0		225.1558:TMT2plex (Duplex Tandem Mass TagÂ®)	0		TRUE	TPK1	sp|P06244|KAPA_YEAST	cAMP-dependent protein kinase type 1
20180918_Lumos_RSLC6_Reiter_Ammerer_MFPL_onbead_Tpk1_1_2.13160.13160.4	EGGETQEKPKQPHVTYYNEEQYK		4	2179.92	696.329	696.579	0.999	1.0013	2782.29	2781.29	9.099e-06	27.392	20.204	1	0		0.9970:Label:15N(1) (15N(1))	0		TRUE	TPK1	sp|P06244|KAPA_YEAST	cAMP-dependent protein kinase type 1
20180918_Lumos_RSLC6_Reiter_Ammerer_MFPL_onbead_Tpk1_1_2.13164.13164.3	EGGETQEKPKQPHVTYYNEEQYK		3	2180.29	928.103	928.437	1.0019	1.0042	2782.29	2781.29	1e-15	62.608	45.075	1	0		0.9970:Label:15N(1) (15N(1))	0		TRUE	TPK1	sp|P06244|KAPA_YEAST	cAMP-dependent protein kinase type 1
20180918_Lumos_RSLC6_Reiter_Ammerer_MFPL_onbead_Tpk1_1_2.13186.13186.3	EGGETQEKPKQPHVTYYNEEQYK	EGGET[181]QEKPKQPHVTYYNEEQYK	3	2183.64	954.759	936.096	-55.9895	-55.9872	2805.26	2861.25	1.489e-05	30.548	28.022	0.9934	0	5T(79.9663)	Unknown	0		FALSE	TPK1	sp|P06244|KAPA_YEAST	cAMP-dependent protein kinase type 1
20180918_Lumos_RSLC6_Reiter_Ammerer_MFPL_onbead_Tpk1_1_2.13192.13192.3	EGGETQEKPKQPHVTYYNEEQYK	EGGET[181]QEKPKQPHVTYYNEEQYK	3	2184.59	954.759	947.444	-21.9439	-21.9416	2839.31	2861.25	3.176e-06	31.911	29.385	0.9787	0	5T(79.9663)	Unknown	0		FALSE	TPK1	sp|P06244|KAPA_YEAST	cAMP-dependent protein kinase type 1
20180918_Lumos_RSLC6_Reiter_Ammerer_MFPL_onbead_Tpk1_1_2.13193.13193.4	EGGETQEKPKQPHVTYYNEEQYK		4	2184.75	696.329	702.312	23.9304	23.9327	2805.22	2781.29	0.004324	22.242	19.908	0.9824	0		Unknown	0		TRUE	TPK1	sp|P06244|KAPA_YEAST	cAMP-dependent protein kinase type 1
20180918_Lumos_RSLC6_Reiter_Ammerer_MFPL_onbead_Tpk1_1_2.13198.13198.2	EGGETQEKPKQPHVTYYNEEQYK		2	2185.51	1391.65	1392.15	1.0031	1.0054	2782.29	2781.29	1e-15	52.039	32.664	1	0		0.9970:Label:15N(1) (15N(1))	0		TRUE	TPK1	sp|P06244|KAPA_YEAST	cAMP-dependent protein kinase type 1
20180918_Lumos_RSLC6_Reiter_Ammerer_MFPL_onbead_Tpk1_1_2.13209.13209.3	EGGETQEKPKQPHVTYYNEEQYK		3	2187.26	928.103	947.11	57.0202	57.0225	2838.31	2781.29	1.091e-08	35.716	32.112	1	0		57.0215:Gly (Addition of Glycine), 57.0215:Carbamidomethyl (Iodoacetamide derivative), 57.0215:Ala->Gln (Ala->Gln substitution), 57.0215:Gly->Asn (Gly->Asn substitution)	0		TRUE	TPK1	sp|P06244|KAPA_YEAST	cAMP-dependent protein kinase type 1
20180918_Lumos_RSLC6_Reiter_Ammerer_MFPL_onbead_Tpk1_1_2.13220.13220.3	EGGETQEKPKQPHVTYYNEEQYK		3	2188.99	928.103	942.758	43.9646	43.9669	2825.25	2781.29	0.1414	17.097	14.522	0.594	0		Unknown	0		TRUE	TPK1	sp|P06244|KAPA_YEAST	cAMP-dependent protein kinase type 1
20180918_Lumos_RSLC6_Reiter_Ammerer_MFPL_onbead_Tpk1_1_2.13239.13239.4	EGGETQEKPKQPHVTYYNEEQYK		4	2191.66	696.329	710.835	58.0229	58.0252	2839.31	2781.29	7.733e-05	23.915	19.187	1	0		58.0293:Carbofuran (2,3-dihydro-2,2-dimethyl-7-benzofuranol N-methyl carbamate), 58.0207:Gln->Trp (Gln->Trp substitution)	0		TRUE	TPK1	sp|P06244|KAPA_YEAST	cAMP-dependent protein kinase type 1
20180918_Lumos_RSLC6_Reiter_Ammerer_MFPL_onbead_Tpk1_1_2.13255.13255.3	EGGETQEKPKQPHVTYYNEEQYK	EGGET[181]QEKPKQPHVTYYNEEQYK	3	2193.94	954.759	936.423	-55.0074	-55.0051	2806.25	2861.25	1.102e-07	33.891	31.291	1	0	5T(79.9663)	Unknown	0		FALSE	TPK1	sp|P06244|KAPA_YEAST	cAMP-dependent protein kinase type 1
20180918_Lumos_RSLC6_Reiter_Ammerer_MFPL_onbead_Tpk1_1_2.13334.13334.3	EGGETQEKPKQPHVTYYNEEQYK		3	2206.34	928.103	929.103	2.9985	3.0008	2784.29	2781.29	1.687e-10	40.949	38.049	1	0		3.0101:Label:13C(3) (13C3 label for SILAC), 2.9911:Label:15N(3) (15N(3))	0		TRUE	TPK1	sp|P06244|KAPA_YEAST	cAMP-dependent protein kinase type 1
20180918_Lumos_RSLC6_Reiter_Ammerer_MFPL_onbead_Tpk1_1_2.13432.13432.4	EGGETQEKPKQPHVTYYNEEQYK		4	2224.77	696.329	696.579	1.0004	1.0027	2782.29	2781.29	0.0005571	22.223	15.302	1	0		0.9970:Label:15N(1) (15N(1))	0		TRUE	TPK1	sp|P06244|KAPA_YEAST	cAMP-dependent protein kinase type 1
20180918_Lumos_RSLC6_Reiter_Ammerer_MFPL_onbead_Tpk1_1_2.13447.13447.3	EGGETQEKPKQPHVTYYNEEQYK		3	2227.06	928.103	928.437	1.0002	1.0025	2782.29	2781.29	1e-15	58.725	44.027	1	0		0.9970:Label:15N(1) (15N(1))	0		TRUE	TPK1	sp|P06244|KAPA_YEAST	cAMP-dependent protein kinase type 1
20180918_Lumos_RSLC6_Reiter_Ammerer_MFPL_onbead_Tpk1_1_2.13479.13479.3	EGGETQEKPKQPHVTYYNEEQYK		3	2231.55	928.103	928.435	0.9953	0.9976	2782.28	2781.29	2.192e-15	61.419	46.456	1	0		0.9970:Label:15N(1) (15N(1))	0		TRUE	TPK1	sp|P06244|KAPA_YEAST	cAMP-dependent protein kinase type 1
20180918_Lumos_RSLC6_Reiter_Ammerer_MFPL_onbead_Tpk1_1_2.13480.13480.4	EGGETQEKPKQPHVTYYNEEQYK		4	2231.7	696.329	696.83	2.0036	2.0059	2783.29	2781.29	0.0004081	22.562	15.643	1	0		2.0042:Label:18O(1) (O18 Labeling), 1.9979:Glu->Met (Glu->Met substitution), 2.0156:Pro->Val (Pro->Val substitution)	0		TRUE	TPK1	sp|P06244|KAPA_YEAST	cAMP-dependent protein kinase type 1
20180918_Lumos_RSLC6_Reiter_Ammerer_MFPL_onbead_Tpk1_1_2.13486.13486.2	STEEQNGGGQKSLDDR	n[43]STEEQNGGGQKS[167]LDDR	2	2232.63	921.879	922.38	1.0014	1.0037	1842.74	1841.74	0.0003295	23.089	16.563	0.9996	0	n(42.0106), 12S(79.9663)	0.9970:Label:15N(1) (15N(1))	0		TRUE	TPK1	sp|P06244|KAPA_YEAST	cAMP-dependent protein kinase type 1
20180918_Lumos_RSLC6_Reiter_Ammerer_MFPL_onbead_Tpk1_1_2.13547.13547.2	LGNLQNGTEDVK		2	2241.2	644.331	643.84	-0.9821	-0.9798	1285.66	1286.65	1.36	15.264	13.202	0.5194	0		-0.9840:Amidated (Amidation), -0.9840:Asp->Asn (Asp->Asn substitution), -0.9840:Glu->Gln (Glu->Gln substitution), -0.9790:Glu->pyro-Glu+Methyl:2H(2)13C(1) (Pyro-Glu from E + Methylation Medium)	0		TRUE	TPK1	sp|P06244|KAPA_YEAST	cAMP-dependent protein kinase type 1
20180918_Lumos_RSLC6_Reiter_Ammerer_MFPL_onbead_Tpk1_1_2.13995.13995.4	EGGETQEKPKQPHVTYYNEEQYK	EGGET[181]QEKPKQPHVTYYNEEQYK	4	2309.77	716.321	827.38	444.238	444.24	3305.49	2861.25	2.277e-08	30.537	15.83	1	0	5T(79.9663)	Unknown	0		FALSE	TPK1	sp|P06244|KAPA_YEAST	cAMP-dependent protein kinase type 1
20180918_Lumos_RSLC6_Reiter_Ammerer_MFPL_onbead_Tpk1_1_2.14014.14014.4	EGGETQEKPKQPHVTYYNEEQYK		4	2312.4	696.329	697.078	2.9941	2.9964	2784.28	2781.29	0.1608	21.039	18.816	0.9241	0		2.9883:Deamidated:18O(1) (Deamidation in presence of O18), 2.9911:Label:15N(3) (15N(3)), 2.9883:Delta:H(1)N(-1)18O(1) (glycosylated asparagine 18O labeling)	0		TRUE	TPK1	sp|P06244|KAPA_YEAST	cAMP-dependent protein kinase type 1
20180918_Lumos_RSLC6_Reiter_Ammerer_MFPL_onbead_Tpk1_1_2.14070.14070.2	QFIAQAR		2	2320.38	417.235	417.235	-0.0009	0.0014	832.455	832.456	5.911	14.198	13.313	0.9111	0		Unknown	0		TRUE	TPK1	sp|P06244|KAPA_YEAST	cAMP-dependent protein kinase type 1
20180918_Lumos_RSLC6_Reiter_Ammerer_MFPL_onbead_Tpk1_1_2.14092.14092.2	LGNLQNGTEDVK		2	2323.36	644.331	644.33	-0.0015	0.0008	1286.65	1286.65	1.792e-09	33.05	15.706	1	0		Unknown	0		TRUE	TPK1	sp|P06244|KAPA_YEAST	cAMP-dependent protein kinase type 1
20180918_Lumos_RSLC6_Reiter_Ammerer_MFPL_onbead_Tpk1_1_2.14120.14120.2	QFIAQAR		2	2327.45	417.235	417.235	-0.0011	0.0012	832.454	832.456	1.027	15.481	13.258	0.9683	0		Unknown	0		TRUE	TPK1	sp|P06244|KAPA_YEAST	cAMP-dependent protein kinase type 1
20180918_Lumos_RSLC6_Reiter_Ammerer_MFPL_onbead_Tpk1_1_2.14160.14160.2	QPHVTYYNEEQYK		2	2333.39	849.891	785.861	-128.061	-128.059	1569.71	1697.77	3.093e-05	23.887	14.788	0.9844	0		Unknown	0		TRUE	TPK1	sp|P06244|KAPA_YEAST	cAMP-dependent protein kinase type 1
20180918_Lumos_RSLC6_Reiter_Ammerer_MFPL_onbead_Tpk1_1_2.14227.14227.2	LGNLQNGTEDVK		2	2343.27	644.331	643.831	-0.9992	-0.9969	1285.65	1286.65	0.03131	22.607	18.066	0.9783	0		Unknown	0		TRUE	TPK1	sp|P06244|KAPA_YEAST	cAMP-dependent protein kinase type 1
20180918_Lumos_RSLC6_Reiter_Ammerer_MFPL_onbead_Tpk1_1_2.14461.14461.3	EGGETQEKPKQPHVTYYNEEQYK	EGGET[181]QEKPKQPHVTYYNEEQYK	3	2377.32	954.759	1011.94	171.553	171.555	3032.81	2861.25	0.02088	19.912	19.126	0.5674	0	5T(79.9663)	Unknown	0		FALSE	TPK1	sp|P06244|KAPA_YEAST	cAMP-dependent protein kinase type 1
20180918_Lumos_RSLC6_Reiter_Ammerer_MFPL_onbead_Tpk1_1_2.14583.14583.2	LGNLQNGTEDVK		2	2394.94	644.331	644.33	-0.002	0.0003	1286.64	1286.65	6.225e-10	35.039	15.806	1	0		Unknown	0		TRUE	TPK1	sp|P06244|KAPA_YEAST	cAMP-dependent protein kinase type 1
20180918_Lumos_RSLC6_Reiter_Ammerer_MFPL_onbead_Tpk1_1_2.14602.14602.2	FPNPVAK		2	2397.58	386.721	386.721	-0.0013	0.001	771.427	771.428	4.197	15.491	14.282	0.9202	0		Unknown	0		FALSE	TPK3	sp|P05986|KAPC_YEAST	cAMP-dependent protein kinase type 3	sp|P06245|KAPB_YEAST, sp|P06244|KAPA_YEAST
20180918_Lumos_RSLC6_Reiter_Ammerer_MFPL_onbead_Tpk1_1_2.14633.14633.3	LKQVEHTNDER		3	2402.04	456.9	511.27	163.108	163.11	1530.79	1367.68	0.002317	22.58	17.535	0.9962	0		Unknown	0		FALSE	TPK3	sp|P05986|KAPC_YEAST	cAMP-dependent protein kinase type 3	sp|P06244|KAPA_YEAST
20180918_Lumos_RSLC6_Reiter_Ammerer_MFPL_onbead_Tpk1_1_2.14693.14693.2	LGNLQNGTEDVK		2	2410.37	644.331	587.764	-113.134	-113.132	1173.51	1286.65	0.0008396	20.044	13.348	0.9905	0		Unknown	0		TRUE	TPK1	sp|P06244|KAPA_YEAST	cAMP-dependent protein kinase type 1
20180918_Lumos_RSLC6_Reiter_Ammerer_MFPL_onbead_Tpk1_1_2.14764.14764.2	STEEQNGGGQKSLDDR	n[43]STEEQNGGGQKS[167]LDDR	2	2421	921.879	922.37	0.9818	0.9841	1842.72	1841.74	3.587	15.506	15.431	0.7271	0	n(42.0106), 12S(79.9663)	0.9840:Deamidated (Deamidation), 0.9840:Asn->Asp (Asn->Asp substitution), 0.9840:Gln->Glu (Gln->Glu substitution)	0		TRUE	TPK1	sp|P06244|KAPA_YEAST	cAMP-dependent protein kinase type 1
20180918_Lumos_RSLC6_Reiter_Ammerer_MFPL_onbead_Tpk1_1_2.14802.14802.2	LGNLQNGTEDVK		2	2426.69	644.331	644.33	-0.0019	0.0004	1286.64	1286.65	2.531e-09	33.226	15.828	1	0		Unknown	0		TRUE	TPK1	sp|P06244|KAPA_YEAST	cAMP-dependent protein kinase type 1
20180918_Lumos_RSLC6_Reiter_Ammerer_MFPL_onbead_Tpk1_1_2.14823.14823.2	FPNPVAK		2	2429.6	386.721	386.721	-0.0013	0.001	771.427	771.428	0.007264	18.23	14.259	0.9996	0		Unknown	0		FALSE	TPK3	sp|P05986|KAPC_YEAST	cAMP-dependent protein kinase type 3	sp|P06245|KAPB_YEAST, sp|P06244|KAPA_YEAST
20180918_Lumos_RSLC6_Reiter_Ammerer_MFPL_onbead_Tpk1_1_2.14987.14987.2	STEEQNGGGQKSLDDR	n[43]STEEQNGGGQKS[167]LDDR	2	2453.16	921.879	922.37	0.982	0.9843	1842.72	1841.74	0.1534	18.162	18.04	0.9866	0	n(42.0106), 12S(79.9663)	0.9840:Deamidated (Deamidation), 0.9840:Asn->Asp (Asn->Asp substitution), 0.9840:Gln->Glu (Gln->Glu substitution)	0		TRUE	TPK1	sp|P06244|KAPA_YEAST	cAMP-dependent protein kinase type 1
20180918_Lumos_RSLC6_Reiter_Ammerer_MFPL_onbead_Tpk1_1_2.15022.15022.2	LGNLQNGTEDVK		2	2458.43	644.331	644.33	-0.0012	0.0011	1286.65	1286.65	7.499e-11	35.045	17.448	1	0		Unknown	0		TRUE	TPK1	sp|P06244|KAPA_YEAST	cAMP-dependent protein kinase type 1
20180918_Lumos_RSLC6_Reiter_Ammerer_MFPL_onbead_Tpk1_1_2.15032.15032.2	QPHVTYYNEEQYK		2	2459.73	849.891	878.904	58.0254	58.0277	1755.79	1697.77	0.01756	15.185	12.374	0.9963	0		58.0293:Carbofuran (2,3-dihydro-2,2-dimethyl-7-benzofuranol N-methyl carbamate), 58.0207:Gln->Trp (Gln->Trp substitution)	0		TRUE	TPK1	sp|P06244|KAPA_YEAST	cAMP-dependent protein kinase type 1
20180918_Lumos_RSLC6_Reiter_Ammerer_MFPL_onbead_Tpk1_1_2.15045.15045.2	FPNPVAK		2	2461.5	386.721	386.721	-0.0014	0.0009	771.427	771.428	0.007404	18.225	14.242	0.9996	0		Unknown	0		FALSE	TPK3	sp|P05986|KAPC_YEAST	cAMP-dependent protein kinase type 3	sp|P06244|KAPA_YEAST, sp|P06245|KAPB_YEAST
20180918_Lumos_RSLC6_Reiter_Ammerer_MFPL_onbead_Tpk1_1_2.15077.15077.2	QPHVTYYNEEQYK		2	2466.25	849.891	850.894	2.0044	2.0067	1699.77	1697.77	0.0001194	24.639	17.396	0.9998	0		2.0042:Label:18O(1) (O18 Labeling), 1.9979:Glu->Met (Glu->Met substitution), 2.0156:Pro->Val (Pro->Val substitution)	0		TRUE	TPK1	sp|P06244|KAPA_YEAST	cAMP-dependent protein kinase type 1
20180918_Lumos_RSLC6_Reiter_Ammerer_MFPL_onbead_Tpk1_1_2.15080.15080.3	QPHVTYYNEEQYK		3	2466.64	566.93	566.929	-0.0019	0.0004	1697.77	1697.77	6.252e-05	29.329	19.399	1	0		Unknown	0		TRUE	TPK1	sp|P06244|KAPA_YEAST	cAMP-dependent protein kinase type 1
20180918_Lumos_RSLC6_Reiter_Ammerer_MFPL_onbead_Tpk1_1_2.15114.15114.3	EGGETQEKPKQPHVTYYNEEQYK		3	2471.54	928.103	1090.85	488.248	488.251	3269.54	2781.29	3.843e-06	27.991	25.321	0.9938	0		Unknown	0		TRUE	TPK1	sp|P06244|KAPA_YEAST	cAMP-dependent protein kinase type 1
20180918_Lumos_RSLC6_Reiter_Ammerer_MFPL_onbead_Tpk1_1_2.15129.15129.2	QPHVTYYNEEQYK		2	2473.59	849.891	842.382	-15.0185	-15.0162	1682.75	1697.77	0.001024	20.235	15.506	0.9947	0		-15.0109:Ser->LacticAcid (lactic acid from N-term Ser), -15.0109:Lys->Xle (Lys->Leu/Ile substitution), -15.0109:ISD_z+2_ion (ISD (z+2)-series)	0		TRUE	TPK1	sp|P06244|KAPA_YEAST	cAMP-dependent protein kinase type 1
20180918_Lumos_RSLC6_Reiter_Ammerer_MFPL_onbead_Tpk1_1_2.15133.15133.2	QPHVTYYNEEQYK		2	2474.26	849.891	841.888	-16.0077	-16.0054	1681.76	1697.77	1.568e-06	24.87	15.784	1	0		-16.0135:Met->Asp (Met->Asp substitution)	0		TRUE	TPK1	sp|P06244|KAPA_YEAST	cAMP-dependent protein kinase type 1
20180918_Lumos_RSLC6_Reiter_Ammerer_MFPL_onbead_Tpk1_1_2.15135.15135.3	QPHVTYYNEEQYK		3	2474.51	566.93	561.254	-17.0273	-17.025	1680.74	1697.77	0.007211	23.612	17.614	0.9923	0		-17.0265:Gln->pyro-Glu (Pyro-glu from Q), -17.0265:Ammonia-loss (Loss of ammonia)	0		TRUE	TPK1	sp|P06244|KAPA_YEAST	cAMP-dependent protein kinase type 1
20180918_Lumos_RSLC6_Reiter_Ammerer_MFPL_onbead_Tpk1_1_2.15139.15139.3	QPHVTYYNEEQYK		3	2475.07	566.93	560.926	-18.0116	-18.0093	1679.76	1697.77	0.01297	22.969	17.595	0.9935	0		-18.0106:Glu->pyro-Glu (Pyro-glu from E), -18.0106:Dehydrated (Dehydration)	0		TRUE	TPK1	sp|P06244|KAPA_YEAST	cAMP-dependent protein kinase type 1
20180918_Lumos_RSLC6_Reiter_Ammerer_MFPL_onbead_Tpk1_1_2.15154.15154.2	QPHVTYYNEEQYK		2	2476.94	849.891	841.385	-17.0132	-17.0109	1680.76	1697.77	6.156e-06	25.431	15.99	1	0		Unknown	0		TRUE	TPK1	sp|P06244|KAPA_YEAST	cAMP-dependent protein kinase type 1
20180918_Lumos_RSLC6_Reiter_Ammerer_MFPL_onbead_Tpk1_1_2.15161.15161.2	QPHVTYYNEEQYK		2	2478.05	849.891	841.877	-16.0292	-16.0269	1681.74	1697.77	1.262e-06	25.049	15.816	1	0		-16.0313:Xle->Pro (Leu/Ile->Pro substitution), -16.0279:Phe->Met (Phe->Met substitution)	0		TRUE	TPK1	sp|P06244|KAPA_YEAST	cAMP-dependent protein kinase type 1
20180918_Lumos_RSLC6_Reiter_Ammerer_MFPL_onbead_Tpk1_1_2.15167.15167.2	QPHVTYYNEEQYK		2	2478.86	849.891	841.364	-17.0542	-17.0519	1680.71	1697.77	5.079e-07	25.44	16.023	1	0		Unknown	0		TRUE	TPK1	sp|P06244|KAPA_YEAST	cAMP-dependent protein kinase type 1
20180918_Lumos_RSLC6_Reiter_Ammerer_MFPL_onbead_Tpk1_1_2.15174.15174.2	QPHVTYYNEEQYK		2	2480.02	849.891	841.377	-17.0291	-17.0268	1680.74	1697.77	5.788e-06	25.425	15.955	1	0		-17.0265:Ammonia-loss (Loss of ammonia), -17.0265:Gln->pyro-Glu (Pyro-glu from Q)	0		TRUE	TPK1	sp|P06244|KAPA_YEAST	cAMP-dependent protein kinase type 1
20180918_Lumos_RSLC6_Reiter_Ammerer_MFPL_onbead_Tpk1_1_2.15179.15179.3	QPHVTYYNEEQYK		3	2480.87	566.93	572.932	18.0057	18.008	1715.77	1697.77	0.003011	22.7	17.099	0.9953	0		Unknown	0		TRUE	TPK1	sp|P06244|KAPA_YEAST	cAMP-dependent protein kinase type 1
20180918_Lumos_RSLC6_Reiter_Ammerer_MFPL_onbead_Tpk1_1_2.15203.15203.2	QPHVTYYNEEQYK		2	2484.38	849.891	841.394	-16.9951	-16.9928	1680.77	1697.77	6.138e-06	25.413	16.003	1	0		-16.9976:Met->Asn (Met->Asn substitution), -16.9902:Asn->Pro (Asn->Pro substitution)	0		TRUE	TPK1	sp|P06244|KAPA_YEAST	cAMP-dependent protein kinase type 1
20180918_Lumos_RSLC6_Reiter_Ammerer_MFPL_onbead_Tpk1_1_2.15234.15234.2	QPHVTYYNEEQYK		2	2488.96	849.891	841.88	-16.0225	-16.0202	1681.75	1697.77	8.843e-07	24.984	15.779	1	0		-16.0279:Phe->Met (Phe->Met substitution), -16.0135:Met->Asp (Met->Asp substitution)	0		TRUE	TPK1	sp|P06244|KAPA_YEAST	cAMP-dependent protein kinase type 1
20180918_Lumos_RSLC6_Reiter_Ammerer_MFPL_onbead_Tpk1_1_2.15237.15237.2	LGNLQNGTEDVK		2	2489.47	644.331	644.33	-0.0017	0.0006	1286.64	1286.65	9.656e-08	33.237	30.251	1	0		Unknown	0		TRUE	TPK1	sp|P06244|KAPA_YEAST	cAMP-dependent protein kinase type 1
20180918_Lumos_RSLC6_Reiter_Ammerer_MFPL_onbead_Tpk1_1_2.15259.15259.2	FPNPVAK		2	2492.61	386.721	386.721	-0.001	0.0013	771.427	771.428	0.009453	18.151	14.211	0.9996	0		Unknown	0		FALSE	TPK3	sp|P05986|KAPC_YEAST	cAMP-dependent protein kinase type 3	sp|P06244|KAPA_YEAST, sp|P06245|KAPB_YEAST
20180918_Lumos_RSLC6_Reiter_Ammerer_MFPL_onbead_Tpk1_1_2.15301.15301.3	QPHVTYYNEEQYK		3	2498.51	566.93	566.929	-0.0017	0.0006	1697.77	1697.77	1.752e-06	33.728	19.447	1	0		Unknown	0		TRUE	TPK1	sp|P06244|KAPA_YEAST	cAMP-dependent protein kinase type 1
20180918_Lumos_RSLC6_Reiter_Ammerer_MFPL_onbead_Tpk1_1_2.15302.15302.2	QPHVTYYNEEQYK		2	2498.78	849.891	849.89	-0.0021	0.0002	1697.77	1697.77	1.636e-05	26.466	17.625	1	0		Unknown	0		TRUE	TPK1	sp|P06244|KAPA_YEAST	cAMP-dependent protein kinase type 1
20180918_Lumos_RSLC6_Reiter_Ammerer_MFPL_onbead_Tpk1_1_2.15408.15408.3	EGGETQEKPKQPHVTYYNEEQYK	EGGET[181]QEKPKQPHVTYYNEEQYK	3	2513.25	954.759	995.945	123.56	123.562	2984.81	2861.25	8.994e-08	34.905	32.167	1	0	5T(79.9663)	Unknown	0		FALSE	TPK1	sp|P06244|KAPA_YEAST	cAMP-dependent protein kinase type 1
20180918_Lumos_RSLC6_Reiter_Ammerer_MFPL_onbead_Tpk1_1_2.15453.15453.2	LGNLQNGTEDVK		2	2520.36	644.331	644.33	-0.0021	0.0002	1286.64	1286.65	2.409e-09	33.166	15.88	1	0		Unknown	0		TRUE	TPK1	sp|P06244|KAPA_YEAST	cAMP-dependent protein kinase type 1
20180918_Lumos_RSLC6_Reiter_Ammerer_MFPL_onbead_Tpk1_1_2.15475.15475.2	FPNPVAK		2	2523.37	386.721	386.721	-0.0011	0.0012	771.427	771.428	0.005722	18.217	14.233	0.9997	0		Unknown	0		FALSE	TPK3	sp|P05986|KAPC_YEAST	cAMP-dependent protein kinase type 3	sp|P06244|KAPA_YEAST, sp|P06245|KAPB_YEAST
20180918_Lumos_RSLC6_Reiter_Ammerer_MFPL_onbead_Tpk1_1_2.15493.15493.2	LGNLQNGTEDVK		2	2526.08	644.331	673.341	58.0218	58.0241	1344.67	1286.65	4.096e-06	24.285	16.243	1	0		58.0293:Carbofuran (2,3-dihydro-2,2-dimethyl-7-benzofuranol N-methyl carbamate), 58.0207:Gln->Trp (Gln->Trp substitution)	0		TRUE	TPK1	sp|P06244|KAPA_YEAST	cAMP-dependent protein kinase type 1
20180918_Lumos_RSLC6_Reiter_Ammerer_MFPL_onbead_Tpk1_1_2.15503.15503.2	LGNLQNGTEDVK		2	2527.51	644.331	672.841	57.02	57.0223	1343.67	1286.65	7.235e-06	24.458	15.774	1	0		57.0215:Carbamidomethyl (Iodoacetamide derivative), 57.0215:Ala->Gln (Ala->Gln substitution), 57.0215:Gly->Asn (Gly->Asn substitution), 57.0215:Gly (Addition of Glycine)	0		TRUE	TPK1	sp|P06244|KAPA_YEAST	cAMP-dependent protein kinase type 1
20180918_Lumos_RSLC6_Reiter_Ammerer_MFPL_onbead_Tpk1_1_2.15509.15509.2	QPHVTYYNEEQYK		2	2528.5	849.891	878.401	57.0182	57.0205	1754.79	1697.77	9.091e-05	23.25	15.847	0.9983	0		57.0215:Carbamidomethyl (Iodoacetamide derivative), 57.0215:Ala->Gln (Ala->Gln substitution), 57.0215:Gly->Asn (Gly->Asn substitution), 57.0215:Gly (Addition of Glycine)	0		TRUE	TPK1	sp|P06244|KAPA_YEAST	cAMP-dependent protein kinase type 1
20180918_Lumos_RSLC6_Reiter_Ammerer_MFPL_onbead_Tpk1_1_2.15511.15511.3	QPHVTYYNEEQYK		3	2528.74	566.93	567.264	1.0013	1.0036	1698.77	1697.77	0.0003254	27.39	18.821	1	0		0.9970:Label:15N(1) (15N(1))	0		TRUE	TPK1	sp|P06244|KAPA_YEAST	cAMP-dependent protein kinase type 1
20180918_Lumos_RSLC6_Reiter_Ammerer_MFPL_onbead_Tpk1_1_2.15525.15525.3	QPHVTYYNEEQYK		3	2530.94	566.93	586.605	59.0245	59.0268	1756.79	1697.77	2.514	16.64	16.075	0.3912	0		59.0363:Propionyl:13C(3) (Propionate labeling reagent heavy form (+3amu), N-term & K), 59.0194:AEC-MAEC (aminoethylcysteine)	0		TRUE	TPK1	sp|P06244|KAPA_YEAST	cAMP-dependent protein kinase type 1
20180918_Lumos_RSLC6_Reiter_Ammerer_MFPL_onbead_Tpk1_1_2.15570.15570.2	QPHVTYYNEEQYK		2	2537.63	849.891	849.89	-0.0028	-0.0005	1697.77	1697.77	5.306e-07	26.646	17.754	1	0		Unknown	0		TRUE	TPK1	sp|P06244|KAPA_YEAST	cAMP-dependent protein kinase type 1
20180918_Lumos_RSLC6_Reiter_Ammerer_MFPL_onbead_Tpk1_1_2.15637.15637.2	QPHVTYYNEEQYK		2	2547.43	849.891	850.392	1.0012	1.0035	1698.77	1697.77	1.081e-07	26.79	18.028	1	0		0.9970:Label:15N(1) (15N(1))	0		TRUE	TPK1	sp|P06244|KAPA_YEAST	cAMP-dependent protein kinase type 1
20180918_Lumos_RSLC6_Reiter_Ammerer_MFPL_onbead_Tpk1_1_2.15668.15668.2	LGNLQNGTEDVK		2	2551.97	644.331	644.33	-0.0017	0.0006	1286.64	1286.65	4.733e-09	31.373	15.634	1	0		Unknown	0		TRUE	TPK1	sp|P06244|KAPA_YEAST	cAMP-dependent protein kinase type 1
20180918_Lumos_RSLC6_Reiter_Ammerer_MFPL_onbead_Tpk1_1_2.15690.15690.2	FPNPVAK		2	2555.18	386.721	386.721	-0.0011	0.0012	771.427	771.428	0.008756	18.241	14.26	0.9996	0		Unknown	0		FALSE	TPK3	sp|P05986|KAPC_YEAST	cAMP-dependent protein kinase type 3	sp|P06244|KAPA_YEAST, sp|P06245|KAPB_YEAST
20180918_Lumos_RSLC6_Reiter_Ammerer_MFPL_onbead_Tpk1_1_2.15781.15781.2	QPHVTYYNEEQYK		2	2568.51	849.891	850.392	1.0011	1.0034	1698.77	1697.77	4.401e-06	26.819	17.993	1	0		0.9970:Label:15N(1) (15N(1))	0		TRUE	TPK1	sp|P06244|KAPA_YEAST	cAMP-dependent protein kinase type 1
20180918_Lumos_RSLC6_Reiter_Ammerer_MFPL_onbead_Tpk1_1_2.15848.15848.3	QPHVTYYNEEQYK		3	2577.65	566.93	567.264	1.0013	1.0036	1698.77	1697.77	0.01042	23.855	18.592	0.9998	0		0.9970:Label:15N(1) (15N(1))	0		TRUE	TPK1	sp|P06244|KAPA_YEAST	cAMP-dependent protein kinase type 1
20180918_Lumos_RSLC6_Reiter_Ammerer_MFPL_onbead_Tpk1_1_2.15854.15854.2	QPHVTYYNEEQYK		2	2578.4	849.891	737.353	-225.077	-225.075	1472.69	1697.77	0.02499	17.957	14.228	0.982	0		Unknown	0		TRUE	TPK1	sp|P06244|KAPA_YEAST	cAMP-dependent protein kinase type 1
20180918_Lumos_RSLC6_Reiter_Ammerer_MFPL_onbead_Tpk1_1_2.15921.15921.2	FPNPVAK		2	2587.81	386.721	386.721	-0.0012	0.0011	771.427	771.428	0.1395	18.222	15.056	0.9972	0		Unknown	0		FALSE	TPK3	sp|P05986|KAPC_YEAST	cAMP-dependent protein kinase type 3	sp|P06244|KAPA_YEAST, sp|P06245|KAPB_YEAST
20180918_Lumos_RSLC6_Reiter_Ammerer_MFPL_onbead_Tpk1_1_2.15963.15963.2	LGNLQNGTEDVK		2	2593.88	644.331	644.352	0.0437	0.046	1286.69	1286.65	0.008028	18.63	13.121	0.9996	0		0.0364:Gln->Lys (Gln->Lys substitution)	0		TRUE	TPK1	sp|P06244|KAPA_YEAST	cAMP-dependent protein kinase type 1
20180918_Lumos_RSLC6_Reiter_Ammerer_MFPL_onbead_Tpk1_1_2.16027.16027.3	QPHVTYYNEEQYK		3	2604.85	566.93	567.264	1.0018	1.0041	1698.77	1697.77	0.0006275	23.715	15.507	1	0		0.9970:Label:15N(1) (15N(1))	0		TRUE	TPK1	sp|P06244|KAPA_YEAST	cAMP-dependent protein kinase type 1
20180918_Lumos_RSLC6_Reiter_Ammerer_MFPL_onbead_Tpk1_1_2.16052.16052.2	TLGTGSFGR		2	2608.69	448.235	448.235	-0.001	0.0013	894.455	894.456	0.0002453	20.205	15.492	0.9999	0		Unknown	0		FALSE	TPK3	sp|P05986|KAPC_YEAST	cAMP-dependent protein kinase type 3	sp|P06244|KAPA_YEAST, sp|P06245|KAPB_YEAST
20180918_Lumos_RSLC6_Reiter_Ammerer_MFPL_onbead_Tpk1_1_2.16054.16054.3	QPHVTYYNEEQYK		3	2609.08	566.93	567.264	1.0015	1.0038	1698.77	1697.77	0.0001481	26.172	17.483	1	0		0.9970:Label:15N(1) (15N(1))	0		TRUE	TPK1	sp|P06244|KAPA_YEAST	cAMP-dependent protein kinase type 1
20180918_Lumos_RSLC6_Reiter_Ammerer_MFPL_onbead_Tpk1_1_2.16076.16076.2	QPHVTYYNEEQYK		2	2612.45	849.891	849.889	-0.0054	-0.0031	1697.76	1697.77	9.898e-06	26.586	17.698	1	0		Unknown	0		TRUE	TPK1	sp|P06244|KAPA_YEAST	cAMP-dependent protein kinase type 1
20180918_Lumos_RSLC6_Reiter_Ammerer_MFPL_onbead_Tpk1_1_2.16112.16112.2	TLGTGSFGR		2	2617.52	448.235	439.229	-18.0122	-18.0099	876.444	894.456	0.0002969	20.722	14.992	0.9938	0		-18.0106:Glu->pyro-Glu (Pyro-glu from E), -18.0106:Dehydrated (Dehydration)	0		FALSE	TPK3	sp|P05986|KAPC_YEAST	cAMP-dependent protein kinase type 3	sp|P06244|KAPA_YEAST, sp|P06245|KAPB_YEAST
20180918_Lumos_RSLC6_Reiter_Ammerer_MFPL_onbead_Tpk1_1_2.16119.16119.2	FPNPVAK		2	2618.54	386.721	386.721	-0.0011	0.0012	771.427	771.428	0.1131	18.369	15.309	0.9975	0		Unknown	0		FALSE	TPK3	sp|P05986|KAPC_YEAST	cAMP-dependent protein kinase type 3	sp|P06245|KAPB_YEAST, sp|P06244|KAPA_YEAST
20180918_Lumos_RSLC6_Reiter_Ammerer_MFPL_onbead_Tpk1_1_2.16124.16124.2	TLGTGSFGR		2	2619.2	448.235	398.213	-100.045	-100.043	794.411	894.456	0.008508	19.143	14.134	0.8516	0		Unknown	0		FALSE	TPK3	sp|P05986|KAPC_YEAST	cAMP-dependent protein kinase type 3	sp|P06244|KAPA_YEAST, sp|P06245|KAPB_YEAST
20180918_Lumos_RSLC6_Reiter_Ammerer_MFPL_onbead_Tpk1_1_2.16144.16144.2	TLGTGSFGR		2	2621.98	448.235	397.203	-102.064	-102.062	792.392	894.456	0.08577	17.569	14.073	0.4749	0		Unknown	0		FALSE	TPK3	sp|P05986|KAPC_YEAST	cAMP-dependent protein kinase type 3	sp|P06244|KAPA_YEAST, sp|P06245|KAPB_YEAST
20180918_Lumos_RSLC6_Reiter_Ammerer_MFPL_onbead_Tpk1_1_2.16229.16229.2	LGNLQNGTEDVK		2	2634.73	644.331	644.33	-0.0008	0.0015	1286.65	1286.65	3.166e-09	32.38	15.066	1	0		Unknown	0		TRUE	TPK1	sp|P06244|KAPA_YEAST	cAMP-dependent protein kinase type 1
20180918_Lumos_RSLC6_Reiter_Ammerer_MFPL_onbead_Tpk1_1_2.16235.16235.2	LGNLQNGTEDVK		2	2635.57	644.331	644.832	1.0027	1.005	1287.65	1286.65	1.014e-09	32.845	15.765	1	0		0.9970:Label:15N(1) (15N(1))	0		TRUE	TPK1	sp|P06244|KAPA_YEAST	cAMP-dependent protein kinase type 1
20180918_Lumos_RSLC6_Reiter_Ammerer_MFPL_onbead_Tpk1_1_2.16265.16265.2	TLGTGSFGR		2	2639.74	448.235	448.235	-0.0012	0.0011	894.455	894.456	0.0002251	20.204	15.491	0.9999	0		Unknown	0		FALSE	TPK3	sp|P05986|KAPC_YEAST	cAMP-dependent protein kinase type 3	sp|P06245|KAPB_YEAST, sp|P06244|KAPA_YEAST
20180918_Lumos_RSLC6_Reiter_Ammerer_MFPL_onbead_Tpk1_1_2.16284.16284.2	LGNLQNGTEDVK		2	2642.53	644.331	644.822	0.9822	0.9845	1287.63	1286.65	6.666e-07	28.478	15.767	1	0		0.9840:Deamidated (Deamidation), 0.9840:Asn->Asp (Asn->Asp substitution), 0.9840:Gln->Glu (Gln->Glu substitution)	0		TRUE	TPK1	sp|P06244|KAPA_YEAST	cAMP-dependent protein kinase type 1
20180918_Lumos_RSLC6_Reiter_Ammerer_MFPL_onbead_Tpk1_1_2.16382.16382.3	QPHVTYYNEEQYK		3	2656.25	566.93	567.264	1.0017	1.004	1698.77	1697.77	0.6265	19.967	17.151	0.9712	0		0.9970:Label:15N(1) (15N(1))	0		TRUE	TPK1	sp|P06244|KAPA_YEAST	cAMP-dependent protein kinase type 1
20180918_Lumos_RSLC6_Reiter_Ammerer_MFPL_onbead_Tpk1_1_2.16429.16429.2	QPHVTYYNEEQYK		2	2662.66	849.891	849.89	-0.0032	-0.0009	1697.77	1697.77	1.694e-05	24.027	15.32	1	0		Unknown	0		TRUE	TPK1	sp|P06244|KAPA_YEAST	cAMP-dependent protein kinase type 1
20180918_Lumos_RSLC6_Reiter_Ammerer_MFPL_onbead_Tpk1_1_2.16478.16478.2	TLGTGSFGR		2	2669.94	448.235	448.235	-0.0012	0.0011	894.455	894.456	0.001126	18.063	13.403	0.9999	0		Unknown	0		FALSE	TPK3	sp|P05986|KAPC_YEAST	cAMP-dependent protein kinase type 3	sp|P06244|KAPA_YEAST, sp|P06245|KAPB_YEAST
20180918_Lumos_RSLC6_Reiter_Ammerer_MFPL_onbead_Tpk1_1_2.16497.16497.3	QPHVTYYNEEQYK		3	2672.34	566.93	566.929	-0.0021	0.0002	1697.77	1697.77	3.223	17.358	16.904	0.8462	0		Unknown	0		TRUE	TPK1	sp|P06244|KAPA_YEAST	cAMP-dependent protein kinase type 1
20180918_Lumos_RSLC6_Reiter_Ammerer_MFPL_onbead_Tpk1_1_2.16525.16525.2	LGNLQNGTEDVK		2	2676.61	644.331	644.33	-0.0012	0.0011	1286.65	1286.65	1.299e-08	31.342	15.924	1	0		Unknown	0		TRUE	TPK1	sp|P06244|KAPA_YEAST	cAMP-dependent protein kinase type 1
20180918_Lumos_RSLC6_Reiter_Ammerer_MFPL_onbead_Tpk1_1_2.16541.16541.3	EGGETQEKPKQPHVTYYNEEQYK		3	2679.21	928.103	942.771	44.0026	44.0049	2825.29	2781.29	1.066e-12	54.557	47.29	1	0		44.0085:Delta:H(4)C(2)O(-1)S(1) (S-Ethylcystine from Serine), 44.0085:Ser->Met (Ser->Met substitution)	0		TRUE	TPK1	sp|P06244|KAPA_YEAST	cAMP-dependent protein kinase type 1
20180918_Lumos_RSLC6_Reiter_Ammerer_MFPL_onbead_Tpk1_1_2.16555.16555.3	EGGETQEKPKQPHVTYYNEEQYK		3	2681.34	928.103	942.438	43.0051	43.0074	2824.29	2781.29	1e-15	64.637	47.071	1	0		43.0058:Ala->Asn (Ala->Asn substitution), 43.0058:Carbamyl (Carbamylation), 43.0170:Xle->Arg (Leu/Ile->Arg substitution)	0		TRUE	TPK1	sp|P06244|KAPA_YEAST	cAMP-dependent protein kinase type 1
20180918_Lumos_RSLC6_Reiter_Ammerer_MFPL_onbead_Tpk1_1_2.16571.16571.3	QPHVTYYNEEQYK		3	2683.65	566.93	567.592	1.9854	1.9877	1699.75	1697.77	0.006839	24.489	18.866	0.9996	0		1.9793:Val->Thr (Val->Thr substitution), 1.9941:Label:15N(2) (15N(2))	0		TRUE	TPK1	sp|P06244|KAPA_YEAST	cAMP-dependent protein kinase type 1
20180918_Lumos_RSLC6_Reiter_Ammerer_MFPL_onbead_Tpk1_1_2.16574.16574.2	QPHVTYYNEEQYK		2	2683.97	849.891	850.383	0.9819	0.9842	1698.75	1697.77	0.0001557	19.668	12.884	0.9999	0		0.9840:Asn->Asp (Asn->Asp substitution), 0.9840:Gln->Glu (Gln->Glu substitution), 0.9840:Deamidated (Deamidation)	0		TRUE	TPK1	sp|P06244|KAPA_YEAST	cAMP-dependent protein kinase type 1
20180918_Lumos_RSLC6_Reiter_Ammerer_MFPL_onbead_Tpk1_1_2.16576.16576.2	LGNLQNGTEDVK		2	2684.28	644.331	644.822	0.9823	0.9846	1287.63	1286.65	6.153e-08	30.551	15.249	1	0		0.9840:Deamidated (Deamidation), 0.9840:Asn->Asp (Asn->Asp substitution), 0.9840:Gln->Glu (Gln->Glu substitution)	0		TRUE	TPK1	sp|P06244|KAPA_YEAST	cAMP-dependent protein kinase type 1
20180918_Lumos_RSLC6_Reiter_Ammerer_MFPL_onbead_Tpk1_1_2.16617.16617.2	TLGTGSFGR		2	2690.49	448.235	448.781	1.0918	1.0941	895.548	894.456	0.001864	20.235	15.506	0.9999	0		Unknown	0		FALSE	TPK3	sp|P05986|KAPC_YEAST	cAMP-dependent protein kinase type 3	sp|P06244|KAPA_YEAST, sp|P06245|KAPB_YEAST
20180918_Lumos_RSLC6_Reiter_Ammerer_MFPL_onbead_Tpk1_1_2.16658.16658.2	QPHVTYYNEEQYK		2	2696.43	849.891	850.378	0.9726	0.9749	1698.74	1697.77	1.603e-05	22.208	14.97	1	0		0.9840:Gln->Glu (Gln->Glu substitution), 0.9840:Deamidated (Deamidation), 0.9840:Asn->Asp (Asn->Asp substitution)	0		TRUE	TPK1	sp|P06244|KAPA_YEAST	cAMP-dependent protein kinase type 1
20180918_Lumos_RSLC6_Reiter_Ammerer_MFPL_onbead_Tpk1_1_2.16687.16687.2	TLGTGSFGR		2	2700.73	448.235	448.235	-0.0011	0.0012	894.455	894.456	0.01186	16.948	13.403	0.9995	0		Unknown	0		FALSE	TPK3	sp|P05986|KAPC_YEAST	cAMP-dependent protein kinase type 3	sp|P06244|KAPA_YEAST, sp|P06245|KAPB_YEAST
20180918_Lumos_RSLC6_Reiter_Ammerer_MFPL_onbead_Tpk1_1_2.16718.16718.2	QPHVTYYNEEQYK		2	2705.07	849.891	850.885	1.9875	1.9898	1699.76	1697.77	0.001745	19.157	14.286	0.9998	0		1.9941:Label:15N(2) (15N(2)), 1.9979:Glu->Met (Glu->Met substitution)	0		TRUE	TPK1	sp|P06244|KAPA_YEAST	cAMP-dependent protein kinase type 1
20180918_Lumos_RSLC6_Reiter_Ammerer_MFPL_onbead_Tpk1_1_2.16728.16728.3	QPHVTYYNEEQYK		3	2706.26	566.93	566.93	-0.0014	0.0009	1697.77	1697.77	0.0691	21.961	18.153	0.9953	0		Unknown	0		TRUE	TPK1	sp|P06244|KAPA_YEAST	cAMP-dependent protein kinase type 1
20180918_Lumos_RSLC6_Reiter_Ammerer_MFPL_onbead_Tpk1_1_2.16733.16733.2	QPHVTYYNEEQYK		2	2706.95	849.891	849.891	-0.0008	0.0015	1697.77	1697.77	4.8e-05	24.431	15.55	0.9999	0		Unknown	0		TRUE	TPK1	sp|P06244|KAPA_YEAST	cAMP-dependent protein kinase type 1
20180918_Lumos_RSLC6_Reiter_Ammerer_MFPL_onbead_Tpk1_1_2.16783.16783.2	QPHVTYYNEEQYK		2	2714.67	849.891	668.806	-362.171	-362.169	1335.6	1697.77	0.05964	18.718	16.431	0.3959	0		Unknown	0		TRUE	TPK1	sp|P06244|KAPA_YEAST	cAMP-dependent protein kinase type 1
20180918_Lumos_RSLC6_Reiter_Ammerer_MFPL_onbead_Tpk1_1_2.16787.16787.2	LGNLQNGTEDVK		2	2715.2	644.331	644.822	0.9823	0.9846	1287.63	1286.65	0.01877	18.925	15.04	0.9995	0		0.9840:Deamidated (Deamidation), 0.9840:Asn->Asp (Asn->Asp substitution), 0.9840:Gln->Glu (Gln->Glu substitution)	0		TRUE	TPK1	sp|P06244|KAPA_YEAST	cAMP-dependent protein kinase type 1
20180918_Lumos_RSLC6_Reiter_Ammerer_MFPL_onbead_Tpk1_1_2.16797.16797.2	LGNLQNGTEDVK		2	2716.62	644.331	663.795	38.9293	38.9316	1325.58	1286.65	3.375	11.665	10.074	0.2071	0		Unknown	0		TRUE	TPK1	sp|P06244|KAPA_YEAST	cAMP-dependent protein kinase type 1
20180918_Lumos_RSLC6_Reiter_Ammerer_MFPL_onbead_Tpk1_1_2.16799.16799.3	LGNLQNGTEDVK		3	2716.8	429.889	438.203	24.9403	24.9426	1311.59	1286.65	0.01552	20.945	16.106	0.966	0		Unknown	0		FALSE	TPK1	sp|P06244|KAPA_YEAST	cAMP-dependent protein kinase type 1
20180918_Lumos_RSLC6_Reiter_Ammerer_MFPL_onbead_Tpk1_1_2.16827.16827.2	LGNLQNGTEDVK		2	2720.78	644.331	636.308	-16.0451	-16.0428	1270.6	1286.65	0.02181	18.712	14.926	0.9929	0		Unknown	0		TRUE	TPK1	sp|P06244|KAPA_YEAST	cAMP-dependent protein kinase type 1
20180918_Lumos_RSLC6_Reiter_Ammerer_MFPL_onbead_Tpk1_1_2.16847.16847.2	LGNLQNGTEDVK		2	2723.71	644.331	636.308	-16.0459	-16.0436	1270.6	1286.65	0.02137	18.544	14.75	0.9931	0		Unknown	0		TRUE	TPK1	sp|P06244|KAPA_YEAST	cAMP-dependent protein kinase type 1
20180918_Lumos_RSLC6_Reiter_Ammerer_MFPL_onbead_Tpk1_1_2.16870.16870.2	LGNLQNGTEDVK		2	2727.09	644.331	636.81	-15.0417	-15.0394	1271.61	1286.65	0.06722	18.543	16.418	0.8872	0		Unknown	0		TRUE	TPK1	sp|P06244|KAPA_YEAST	cAMP-dependent protein kinase type 1
20180918_Lumos_RSLC6_Reiter_Ammerer_MFPL_onbead_Tpk1_1_2.16898.16898.2	TLGTGSFGR		2	2731.2	448.235	448.235	-0.0009	0.0014	894.455	894.456	6.272e-05	20.23	15.505	0.9999	0		Unknown	0		FALSE	TPK3	sp|P05986|KAPC_YEAST	cAMP-dependent protein kinase type 3	sp|P06244|KAPA_YEAST, sp|P06245|KAPB_YEAST
20180918_Lumos_RSLC6_Reiter_Ammerer_MFPL_onbead_Tpk1_1_2.16983.16983.3	QPHVTYYNEEQYK		3	2743.18	566.93	566.93	-0.0004	0.0019	1697.77	1697.77	0.03531	19.667	15.841	0.9978	0		Unknown	0		TRUE	TPK1	sp|P06244|KAPA_YEAST	cAMP-dependent protein kinase type 1
20180918_Lumos_RSLC6_Reiter_Ammerer_MFPL_onbead_Tpk1_1_2.17008.17008.2	LGNLQNGTEDVK		2	2746.58	644.331	644.822	0.9822	0.9845	1287.63	1286.65	0.01503	19.237	15.377	0.9996	0		0.9840:Deamidated (Deamidation), 0.9840:Asn->Asp (Asn->Asp substitution), 0.9840:Gln->Glu (Gln->Glu substitution)	0		TRUE	TPK1	sp|P06244|KAPA_YEAST	cAMP-dependent protein kinase type 1
20180918_Lumos_RSLC6_Reiter_Ammerer_MFPL_onbead_Tpk1_1_2.17064.17064.3	QPHVTYYNEEQYK		3	2754.68	566.93	567.258	0.9832	0.9855	1698.75	1697.77	0.01775	21.538	16.78	0.9996	0		0.9840:Deamidated (Deamidation), 0.9840:Asn->Asp (Asn->Asp substitution), 0.9840:Gln->Glu (Gln->Glu substitution)	0		TRUE	TPK1	sp|P06244|KAPA_YEAST	cAMP-dependent protein kinase type 1
20180918_Lumos_RSLC6_Reiter_Ammerer_MFPL_onbead_Tpk1_1_2.17117.17117.2	TLGTGSFGR		2	2762.03	448.235	448.235	-0.0014	0.0009	894.454	894.456	0.0001326	20.188	15.498	0.9999	0		Unknown	0		FALSE	TPK3	sp|P05986|KAPC_YEAST	cAMP-dependent protein kinase type 3	sp|P06244|KAPA_YEAST, sp|P06245|KAPB_YEAST
20180918_Lumos_RSLC6_Reiter_Ammerer_MFPL_onbead_Tpk1_1_2.17184.17184.2	TLGTGSFGR		2	2771.59	448.235	448.723	0.9757	0.978	895.432	894.456	0.001106	19.116	15.521	0.9999	0		0.9840:Deamidated (Deamidation), 0.9840:Asn->Asp (Asn->Asp substitution), 0.9840:Gln->Glu (Gln->Glu substitution)	0		FALSE	TPK3	sp|P05986|KAPC_YEAST	cAMP-dependent protein kinase type 3	sp|P06244|KAPA_YEAST, sp|P06245|KAPB_YEAST
20180918_Lumos_RSLC6_Reiter_Ammerer_MFPL_onbead_Tpk1_1_2.17220.17220.2	LGNLQNGTEDVK		2	2777.09	644.331	644.822	0.9823	0.9846	1287.63	1286.65	0.001502	21.292	15.44	0.9999	0		0.9840:Deamidated (Deamidation), 0.9840:Asn->Asp (Asn->Asp substitution), 0.9840:Gln->Glu (Gln->Glu substitution)	0		TRUE	TPK1	sp|P06244|KAPA_YEAST	cAMP-dependent protein kinase type 1
20180918_Lumos_RSLC6_Reiter_Ammerer_MFPL_onbead_Tpk1_1_2.17286.17286.3	QPHVTYYNEEQYK		3	2786.86	566.93	567.264	1.0028	1.0051	1698.77	1697.77	0.002341	24.669	17.411	0.9999	0		0.9970:Label:15N(1) (15N(1))	0		TRUE	TPK1	sp|P06244|KAPA_YEAST	cAMP-dependent protein kinase type 1
20180918_Lumos_RSLC6_Reiter_Ammerer_MFPL_onbead_Tpk1_1_2.17468.17468.2	TLGTGSFGR		2	2814.53	448.235	448.235	-0.0014	0.0009	894.454	894.456	0.001469	18.111	15.527	0.9999	0		Unknown	0		FALSE	TPK3	sp|P05986|KAPC_YEAST	cAMP-dependent protein kinase type 3	sp|P06244|KAPA_YEAST, sp|P06245|KAPB_YEAST
20180918_Lumos_RSLC6_Reiter_Ammerer_MFPL_onbead_Tpk1_1_2.17517.17517.2	LGNLQNGTEDVK		2	2821.55	644.331	644.822	0.9818	0.9841	1287.63	1286.65	0.004138	21.278	15.407	0.9998	0		0.9840:Deamidated (Deamidation), 0.9840:Asn->Asp (Asn->Asp substitution), 0.9840:Gln->Glu (Gln->Glu substitution)	0		TRUE	TPK1	sp|P06244|KAPA_YEAST	cAMP-dependent protein kinase type 1
20180918_Lumos_RSLC6_Reiter_Ammerer_MFPL_onbead_Tpk1_1_2.17764.17764.2	LGNLQNGTEDVK		2	2854.08	644.331	644.822	0.9826	0.9849	1287.63	1286.65	0.001623	21.169	15.28	0.9999	0		0.9840:Asn->Asp (Asn->Asp substitution), 0.9840:Gln->Glu (Gln->Glu substitution), 0.9840:Deamidated (Deamidation)	0		TRUE	TPK1	sp|P06244|KAPA_YEAST	cAMP-dependent protein kinase type 1
20180918_Lumos_RSLC6_Reiter_Ammerer_MFPL_onbead_Tpk1_1_2.17998.17998.2	LGNLQNGTEDVK		2	2884.75	644.331	644.822	0.9817	0.984	1287.63	1286.65	1.728e-05	25.865	15.562	1	0		0.9840:Deamidated (Deamidation), 0.9840:Asn->Asp (Asn->Asp substitution), 0.9840:Gln->Glu (Gln->Glu substitution)	0		TRUE	TPK1	sp|P06244|KAPA_YEAST	cAMP-dependent protein kinase type 1
20180918_Lumos_RSLC6_Reiter_Ammerer_MFPL_onbead_Tpk1_1_2.18243.18243.2	LGNLQNGTEDVK		2	2917.98	644.331	644.822	0.9826	0.9849	1287.63	1286.65	0.0002179	23.564	15.599	0.9999	0		0.9840:Deamidated (Deamidation), 0.9840:Asn->Asp (Asn->Asp substitution), 0.9840:Gln->Glu (Gln->Glu substitution)	0		TRUE	TPK1	sp|P06244|KAPA_YEAST	cAMP-dependent protein kinase type 1
20180918_Lumos_RSLC6_Reiter_Ammerer_MFPL_onbead_Tpk1_1_2.18280.18280.2	TLGTGSFGR		2	2922.63	448.235	448.235	-0.0013	0.001	894.455	894.456	0.01142	18.25	13.47	0.9995	0		Unknown	0		FALSE	TPK3	sp|P05986|KAPC_YEAST	cAMP-dependent protein kinase type 3	sp|P06244|KAPA_YEAST, sp|P06245|KAPB_YEAST
20180918_Lumos_RSLC6_Reiter_Ammerer_MFPL_onbead_Tpk1_1_2.18367.18367.2	LGNLQNGTEDVK		2	2934.7	644.331	645.324	1.9862	1.9885	1288.63	1286.65	0.1069	19.379	17.329	0.9964	0		1.9941:Label:15N(2) (15N(2)), 1.9979:Glu->Met (Glu->Met substitution), 1.9793:Val->Thr (Val->Thr substitution)	0		TRUE	TPK1	sp|P06244|KAPA_YEAST	cAMP-dependent protein kinase type 1
20180918_Lumos_RSLC6_Reiter_Ammerer_MFPL_onbead_Tpk1_1_2.18478.18478.2	LGNLQNGTEDVK		2	2950.22	644.331	644.822	0.9824	0.9847	1287.63	1286.65	0.0005198	22.694	16.416	1	0		0.9840:Gln->Glu (Gln->Glu substitution), 0.9840:Deamidated (Deamidation), 0.9840:Asn->Asp (Asn->Asp substitution)	0		TRUE	TPK1	sp|P06244|KAPA_YEAST	cAMP-dependent protein kinase type 1
20180918_Lumos_RSLC6_Reiter_Ammerer_MFPL_onbead_Tpk1_1_2.18556.18556.2	STEEQNGGGQKSLDDR	n[43]S[167]TEEQNGGGQKS[167]LDDR	2	2960.19	961.862	961.862	-0.0004	0.0019	1921.71	1921.71	0.1139	15.254	15.254	0.9836	0	n(42.0106), 1S(79.9663), 12S(79.9663)	Unknown	0		TRUE	TPK1	sp|P06244|KAPA_YEAST	cAMP-dependent protein kinase type 1
20180918_Lumos_RSLC6_Reiter_Ammerer_MFPL_onbead_Tpk1_1_2.18639.18639.2	TLGTGSFGR		2	2971.22	448.235	448.235	-0.0008	0.0015	894.455	894.456	0.0001965	20.197	15.523	0.9999	0		Unknown	0		FALSE	TPK3	sp|P05986|KAPC_YEAST	cAMP-dependent protein kinase type 3	sp|P06245|KAPB_YEAST, sp|P06244|KAPA_YEAST
20180918_Lumos_RSLC6_Reiter_Ammerer_MFPL_onbead_Tpk1_1_2.18713.18713.2	LGNLQNGTEDVK		2	2981.47	644.331	644.822	0.9826	0.9849	1287.63	1286.65	4.334e-06	27.975	16.993	1	0		0.9840:Deamidated (Deamidation), 0.9840:Asn->Asp (Asn->Asp substitution), 0.9840:Gln->Glu (Gln->Glu substitution)	0		TRUE	TPK1	sp|P06244|KAPA_YEAST	cAMP-dependent protein kinase type 1
20180918_Lumos_RSLC6_Reiter_Ammerer_MFPL_onbead_Tpk1_1_2.19109.19109.2	LGNLQNGTEDVK		2	3035.01	644.331	644.822	0.9824	0.9847	1287.63	1286.65	3.003e-07	28.297	15.64	1	0		0.9840:Deamidated (Deamidation), 0.9840:Asn->Asp (Asn->Asp substitution), 0.9840:Gln->Glu (Gln->Glu substitution)	0		TRUE	TPK1	sp|P06244|KAPA_YEAST	cAMP-dependent protein kinase type 1
20180918_Lumos_RSLC6_Reiter_Ammerer_MFPL_onbead_Tpk1_1_2.19545.19545.2	LGNLQNGTEDVK		2	3093.3	644.331	644.822	0.9822	0.9845	1287.63	1286.65	7.233e-06	24.709	15.432	1	0		0.9840:Asn->Asp (Asn->Asp substitution), 0.9840:Gln->Glu (Gln->Glu substitution), 0.9840:Deamidated (Deamidation)	0		TRUE	TPK1	sp|P06244|KAPA_YEAST	cAMP-dependent protein kinase type 1
20180918_Lumos_RSLC6_Reiter_Ammerer_MFPL_onbead_Tpk1_1_2.19752.19752.2	LGNLQNGTEDVK		2	3123.47	644.331	645.313	1.9656	1.9679	1288.61	1286.65	0.0004003	20.75	13.576	0.9999	0		1.9615:Thr->Cys (Thr->Cys substitution)	0		TRUE	TPK1	sp|P06244|KAPA_YEAST	cAMP-dependent protein kinase type 1
20180918_Lumos_RSLC6_Reiter_Ammerer_MFPL_onbead_Tpk1_1_2.20243.20243.2	TLGTGSFGR		2	3189.47	448.235	448.235	-0.0003	0.002	894.456	894.456	5.646	15.286	14.135	0.9123	0		Unknown	0		FALSE	TPK3	sp|P05986|KAPC_YEAST	cAMP-dependent protein kinase type 3	sp|P06244|KAPA_YEAST, sp|P06245|KAPB_YEAST
20180918_Lumos_RSLC6_Reiter_Ammerer_MFPL_onbead_Tpk1_1_2.20266.20266.2	LGNLQNGTEDVK		2	3193.06	644.331	645.322	1.9833	1.9856	1288.63	1286.65	0.1498	18.014	15.133	0.9957	0		1.9941:Label:15N(2) (15N(2)), 1.9793:Val->Thr (Val->Thr substitution)	0		TRUE	TPK1	sp|P06244|KAPA_YEAST	cAMP-dependent protein kinase type 1
20180918_Lumos_RSLC6_Reiter_Ammerer_MFPL_onbead_Tpk1_1_2.20566.20566.2	LGNLQNGTEDVK		2	3234.02	644.331	644.822	0.9818	0.9841	1287.63	1286.65	9.043e-07	27.128	24.419	1	0		0.9840:Deamidated (Deamidation), 0.9840:Asn->Asp (Asn->Asp substitution), 0.9840:Gln->Glu (Gln->Glu substitution)	0		TRUE	TPK1	sp|P06244|KAPA_YEAST	cAMP-dependent protein kinase type 1
20180918_Lumos_RSLC6_Reiter_Ammerer_MFPL_onbead_Tpk1_1_2.20856.20856.2	LGNLQNGTEDVK		2	3274.29	644.331	645.314	1.9665	1.9688	1288.61	1286.65	1.415	17.234	15.73	0.9372	0		1.9615:Thr->Cys (Thr->Cys substitution)	0		TRUE	TPK1	sp|P06244|KAPA_YEAST	cAMP-dependent protein kinase type 1
20180918_Lumos_RSLC6_Reiter_Ammerer_MFPL_onbead_Tpk1_1_2.21861.21861.4	DLKPENILLDKNGHIK		4	3411.34	462.515	462.514	-0.0025	-0.0002	1846.03	1846.03	1.715e-07	49.428	23.451	1	0		Unknown	0		FALSE	TPK3	sp|P05986|KAPC_YEAST	cAMP-dependent protein kinase type 3	sp|P06244|KAPA_YEAST
20180918_Lumos_RSLC6_Reiter_Ammerer_MFPL_onbead_Tpk1_1_2.21872.21872.3	DLKPENILLDKNGHIK		3	3412.81	616.351	616.684	1.0005	1.0028	1847.03	1846.03	3.893e-08	39.883	19.007	1	0		0.9970:Label:15N(1) (15N(1))	0		FALSE	TPK3	sp|P05986|KAPC_YEAST	cAMP-dependent protein kinase type 3	sp|P06244|KAPA_YEAST
20180918_Lumos_RSLC6_Reiter_Ammerer_MFPL_onbead_Tpk1_1_2.22833.22833.2	QPHVTYYNEEQYK		2	3543.09	849.891	841.879	-16.0249	-16.0226	1681.74	1697.77	4.476e-06	24.523	15.638	1	0		-16.0313:Xle->Pro (Leu/Ile->Pro substitution), -16.0279:Phe->Met (Phe->Met substitution), -16.0135:Met->Asp (Met->Asp substitution)	0		TRUE	TPK1	sp|P06244|KAPA_YEAST	cAMP-dependent protein kinase type 1
20180918_Lumos_RSLC6_Reiter_Ammerer_MFPL_onbead_Tpk1_1_2.22942.22942.2	QPHVTYYNEEQYK		2	3556.86	849.891	870.389	40.9955	40.9978	1738.76	1697.77	0.005539	20.548	15.736	0.9867	0		41.0014:AzidoF (Azidophenylalanine)	0		TRUE	TPK1	sp|P06244|KAPA_YEAST	cAMP-dependent protein kinase type 1
20180918_Lumos_RSLC6_Reiter_Ammerer_MFPL_onbead_Tpk1_1_2.22956.22956.2	QPHVTYYNEEQYK		2	3558.6	849.891	850.382	0.9809	0.9832	1698.75	1697.77	0.000126	24.943	17.621	0.9999	0		0.9840:Gln->Glu (Gln->Glu substitution), 0.9840:Deamidated (Deamidation), 0.9840:Asn->Asp (Asn->Asp substitution)	0		TRUE	TPK1	sp|P06244|KAPA_YEAST	cAMP-dependent protein kinase type 1
20180918_Lumos_RSLC6_Reiter_Ammerer_MFPL_onbead_Tpk1_1_2.23065.23065.2	QPHVTYYNEEQYK		2	3573.29	849.891	841.377	-17.0292	-17.0269	1680.74	1697.77	7.032e-06	24.861	15.693	1	0		-17.0265:Gln->pyro-Glu (Pyro-glu from Q), -17.0265:Ammonia-loss (Loss of ammonia)	0		TRUE	TPK1	sp|P06244|KAPA_YEAST	cAMP-dependent protein kinase type 1
20180918_Lumos_RSLC6_Reiter_Ammerer_MFPL_onbead_Tpk1_1_2.23173.23173.2	DLKPENILLDKNGHIK		2	3588.66	924.023	924.514	0.9818	0.9841	1847.01	1846.03	0.04581	18.092	14.937	0.9936	0		0.9840:Deamidated (Deamidation), 0.9840:Asn->Asp (Asn->Asp substitution), 0.9840:Gln->Glu (Gln->Glu substitution)	0		FALSE	TPK3	sp|P05986|KAPC_YEAST	cAMP-dependent protein kinase type 3	sp|P06244|KAPA_YEAST
20180918_Lumos_RSLC6_Reiter_Ammerer_MFPL_onbead_Tpk1_1_2.23183.23183.2	DLKPENILLDKNGHIK		2	3590.09	924.023	925.015	1.9841	1.9864	1848.02	1846.03	0.02171	18.027	13.649	0.9924	0		1.9941:Label:15N(2) (15N(2)), 1.9793:Val->Thr (Val->Thr substitution)	0		FALSE	TPK3	sp|P05986|KAPC_YEAST	cAMP-dependent protein kinase type 3	sp|P06244|KAPA_YEAST
20180918_Lumos_RSLC6_Reiter_Ammerer_MFPL_onbead_Tpk1_1_2.23273.23273.2	QPHVTYYNEEQYK		2	3603.67	849.891	841.879	-16.0254	-16.0231	1681.74	1697.77	7.848e-06	24.196	15.588	1	0		-16.0135:Met->Asp (Met->Asp substitution), -16.0313:Xle->Pro (Leu/Ile->Pro substitution), -16.0279:Phe->Met (Phe->Met substitution)	0		TRUE	TPK1	sp|P06244|KAPA_YEAST	cAMP-dependent protein kinase type 1
20180918_Lumos_RSLC6_Reiter_Ammerer_MFPL_onbead_Tpk1_1_2.23286.23286.4	LGNLQNGTEDVKNHPWFK		4	3606.01	525.018	525.018	-0.003	-0.0007	2096.04	2096.04	6.343e-13	49.833	35.504	1	0		Unknown	0		TRUE	TPK1	sp|P06244|KAPA_YEAST	cAMP-dependent protein kinase type 1
20180918_Lumos_RSLC6_Reiter_Ammerer_MFPL_onbead_Tpk1_1_2.23322.23322.3	LGNLQNGTEDVKNHPWFK		3	3611.28	699.689	700.021	0.9983	1.0006	2097.04	2096.04	1.493e-11	53.728	32.358	1	0		0.9970:Label:15N(1) (15N(1))	0		TRUE	TPK1	sp|P06244|KAPA_YEAST	cAMP-dependent protein kinase type 1
20180918_Lumos_RSLC6_Reiter_Ammerer_MFPL_onbead_Tpk1_1_2.23339.23339.3	DLKPENILLDKNGHIK		3	3613.33	616.351	617.013	1.9845	1.9868	1848.02	1846.03	0.2167	23.585	21.813	0.9562	0		1.9941:Label:15N(2) (15N(2)), 1.9793:Val->Thr (Val->Thr substitution)	0		FALSE	TPK3	sp|P05986|KAPC_YEAST	cAMP-dependent protein kinase type 3	sp|P06244|KAPA_YEAST
20180918_Lumos_RSLC6_Reiter_Ammerer_MFPL_onbead_Tpk1_1_2.23348.23348.2	LGNLQNGTEDVKNHPWFK		2	3614.71	1049.03	1049.03	-0.003	-0.0007	2096.04	2096.04	2.544e-14	44.332	30.426	1	0		Unknown	0		TRUE	TPK1	sp|P06244|KAPA_YEAST	cAMP-dependent protein kinase type 1
20180918_Lumos_RSLC6_Reiter_Ammerer_MFPL_onbead_Tpk1_1_2.23407.23407.2	DLKPENILLDKNGHIK		2	3622.72	924.023	924.514	0.9818	0.9841	1847.01	1846.03	0.6485	15.867	13.937	0.9194	0		0.9840:Gln->Glu (Gln->Glu substitution), 0.9840:Deamidated (Deamidation), 0.9840:Asn->Asp (Asn->Asp substitution)	0		FALSE	TPK3	sp|P05986|KAPC_YEAST	cAMP-dependent protein kinase type 3	sp|P06244|KAPA_YEAST
20180918_Lumos_RSLC6_Reiter_Ammerer_MFPL_onbead_Tpk1_1_2.23474.23474.2	TLGTGSFGR		2	3631.53	448.235	477.266	58.0621	58.0644	952.518	894.456	2.267	12.948	12.889	0.7332	0		Unknown	0		FALSE	TPK3	sp|P05986|KAPC_YEAST	cAMP-dependent protein kinase type 3	sp|P06244|KAPA_YEAST, sp|P06245|KAPB_YEAST
20180918_Lumos_RSLC6_Reiter_Ammerer_MFPL_onbead_Tpk1_1_2.23498.23498.2	QPHVTYYNEEQYK		2	3634.97	849.891	841.902	-15.9801	-15.9778	1681.79	1697.77	0.03207	20.333	17.22	0.9904	0		-15.9772:Cys->Ser (Cys->Ser substitution)	0		TRUE	TPK1	sp|P06244|KAPA_YEAST	cAMP-dependent protein kinase type 1
20180918_Lumos_RSLC6_Reiter_Ammerer_MFPL_onbead_Tpk1_1_2.23515.23515.4	LGNLQNGTEDVKNHPWFK		4	3636.99	525.018	525.269	1.0007	1.003	2097.04	2096.04	2.177e-12	48.131	34.065	1	0		0.9970:Label:15N(1) (15N(1))	0		TRUE	TPK1	sp|P06244|KAPA_YEAST	cAMP-dependent protein kinase type 1
20180918_Lumos_RSLC6_Reiter_Ammerer_MFPL_onbead_Tpk1_1_2.23591.23591.2	QPHVTYYNEEQYK		2	3647.01	849.891	841.902	-15.9801	-15.9778	1681.79	1697.77	0.07138	20.685	17.653	0.9828	0		-15.9772:Cys->Ser (Cys->Ser substitution)	0		TRUE	TPK1	sp|P06244|KAPA_YEAST	cAMP-dependent protein kinase type 1
20180918_Lumos_RSLC6_Reiter_Ammerer_MFPL_onbead_Tpk1_1_2.23722.23722.4	DLKPENILLDKNGHIK		4	3664.59	462.515	463.011	1.9841	1.9864	1848.02	1846.03	1.545	21.973	21.483	0.7944	0		1.9941:Label:15N(2) (15N(2)), 1.9793:Val->Thr (Val->Thr substitution)	0		FALSE	TPK3	sp|P05986|KAPC_YEAST	cAMP-dependent protein kinase type 3	sp|P06244|KAPA_YEAST
20180918_Lumos_RSLC6_Reiter_Ammerer_MFPL_onbead_Tpk1_1_2.23820.23820.2	QPHVTYYNEEQYK		2	3678.28	849.891	841.377	-17.0286	-17.0263	1680.74	1697.77	0.0002702	24.496	17.083	0.999	0		-17.0265:Gln->pyro-Glu (Pyro-glu from Q), -17.0265:Ammonia-loss (Loss of ammonia)	0		TRUE	TPK1	sp|P06244|KAPA_YEAST	cAMP-dependent protein kinase type 1
20180918_Lumos_RSLC6_Reiter_Ammerer_MFPL_onbead_Tpk1_1_2.23885.23885.3	LGNLQNGTEDVKNHPWFK		3	3686.44	699.689	700.02	0.9931	0.9954	2097.04	2096.04	0.001296	25.704	18.569	0.9998	0		0.9970:Label:15N(1) (15N(1))	0		TRUE	TPK1	sp|P06244|KAPA_YEAST	cAMP-dependent protein kinase type 1
20180918_Lumos_RSLC6_Reiter_Ammerer_MFPL_onbead_Tpk1_1_2.23926.23926.4	LGNLQNGTEDVKNHPWFK	LGNLQNGT[181]EDVKNHPWFK	4	3691.94	545.01	521.011	-95.9937	-95.9914	2080.02	2176.01	0.0009268	24.686	22.317	0.9992	0	8T(79.9663)	Unknown	0		FALSE	TPK1	sp|P06244|KAPA_YEAST	cAMP-dependent protein kinase type 1
20180918_Lumos_RSLC6_Reiter_Ammerer_MFPL_onbead_Tpk1_1_2.23951.23951.3	LGNLQNGTEDVKNHPWFK	LGNLQNGT[181]EDVKNHPWFK	3	3695.01	726.344	694.346	-95.9932	-95.9909	2080.02	2176.01	0.001131	25.968	25.238	0.9294	0	8T(79.9663)	Unknown	0		FALSE	TPK1	sp|P06244|KAPA_YEAST	cAMP-dependent protein kinase type 1
20180918_Lumos_RSLC6_Reiter_Ammerer_MFPL_onbead_Tpk1_1_2.23954.23954.3	LGNLQNGTEDVKNHPWFK		3	3695.4	699.689	700.015	0.9807	0.983	2097.02	2096.04	0.001007	26.061	19.617	0.9999	0		0.9840:Gln->Glu (Gln->Glu substitution), 0.9840:Deamidated (Deamidation), 0.9840:Asn->Asp (Asn->Asp substitution)	0		TRUE	TPK1	sp|P06244|KAPA_YEAST	cAMP-dependent protein kinase type 1
20180918_Lumos_RSLC6_Reiter_Ammerer_MFPL_onbead_Tpk1_1_2.24089.24089.2	QPHVTYYNEEQYK		2	3712.73	849.891	841.377	-17.0283	-17.026	1680.74	1697.77	2.52e-06	24.899	15.757	1	0		-17.0265:Gln->pyro-Glu (Pyro-glu from Q), -17.0265:Ammonia-loss (Loss of ammonia)	0		TRUE	TPK1	sp|P06244|KAPA_YEAST	cAMP-dependent protein kinase type 1
20180918_Lumos_RSLC6_Reiter_Ammerer_MFPL_onbead_Tpk1_1_2.24362.24362.2	QPHVTYYNEEQYK		2	3748.45	849.891	841.879	-16.0243	-16.022	1681.74	1697.77	3.567e-05	22.926	15.561	0.9996	0		-16.0313:Xle->Pro (Leu/Ile->Pro substitution), -16.0279:Phe->Met (Phe->Met substitution), -16.0135:Met->Asp (Met->Asp substitution)	0		TRUE	TPK1	sp|P06244|KAPA_YEAST	cAMP-dependent protein kinase type 1
20180918_Lumos_RSLC6_Reiter_Ammerer_MFPL_onbead_Tpk1_1_2.24756.24756.2	QPHVTYYNEEQYK		2	3799.91	849.891	841.87	-16.0424	-16.0401	1681.73	1697.77	0.02028	17.494	16.04	0.9933	0		-16.0313:Xle->Pro (Leu/Ile->Pro substitution)	0		TRUE	TPK1	sp|P06244|KAPA_YEAST	cAMP-dependent protein kinase type 1
20180918_Lumos_RSLC6_Reiter_Ammerer_MFPL_onbead_Tpk1_1_2.24928.24928.2	ITDFGFAK		2	3822.22	449.737	449.736	-0.0016	0.0007	897.458	897.46	0.01313	17.811	13.498	0.9995	0		Unknown	0		FALSE	TPK3	sp|P05986|KAPC_YEAST	cAMP-dependent protein kinase type 3	sp|P06244|KAPA_YEAST, sp|P06245|KAPB_YEAST
20180918_Lumos_RSLC6_Reiter_Ammerer_MFPL_onbead_Tpk1_1_2.25167.25167.2	ITDFGFAK		2	3853.54	449.737	449.737	-0.0012	0.0011	897.458	897.46	0.004284	17.697	13.41	0.9997	0		Unknown	0		FALSE	TPK3	sp|P05986|KAPC_YEAST	cAMP-dependent protein kinase type 3	sp|P06244|KAPA_YEAST, sp|P06245|KAPB_YEAST
20180918_Lumos_RSLC6_Reiter_Ammerer_MFPL_onbead_Tpk1_1_2.25360.25360.2	QPHVTYYNEEQYK		2	3878.39	849.891	841.87	-16.0438	-16.0415	1681.72	1697.77	0.001695	20.11	15.975	0.9987	0		Unknown	0		TRUE	TPK1	sp|P06244|KAPA_YEAST	cAMP-dependent protein kinase type 1
20180918_Lumos_RSLC6_Reiter_Ammerer_MFPL_onbead_Tpk1_1_2.25418.25418.2	ITDFGFAK		2	3886.38	449.737	449.737	-0.0011	0.0012	897.459	897.46	0.01666	17.74	13.451	0.9994	0		Unknown	0		FALSE	TPK3	sp|P05986|KAPC_YEAST	cAMP-dependent protein kinase type 3	sp|P06244|KAPA_YEAST, sp|P06245|KAPB_YEAST
20180918_Lumos_RSLC6_Reiter_Ammerer_MFPL_onbead_Tpk1_1_2.25668.25668.2	ITDFGFAK		2	3918.63	449.737	449.736	-0.0014	0.0009	897.458	897.46	0.01989	17.721	13.436	0.9993	0		Unknown	0		FALSE	TPK3	sp|P05986|KAPC_YEAST	cAMP-dependent protein kinase type 3	sp|P06244|KAPA_YEAST, sp|P06245|KAPB_YEAST
20180918_Lumos_RSLC6_Reiter_Ammerer_MFPL_onbead_Tpk1_1_2.25748.25748.2	LGNLQNGTEDVKNHPWFK		2	3928.69	1049.03	1049.52	0.9778	0.9801	2097.02	2096.04	2.475e-08	30.16	27.562	1	0		0.9840:Deamidated (Deamidation), 0.9840:Asn->Asp (Asn->Asp substitution), 0.9840:Gln->Glu (Gln->Glu substitution)	0		TRUE	TPK1	sp|P06244|KAPA_YEAST	cAMP-dependent protein kinase type 1
20180918_Lumos_RSLC6_Reiter_Ammerer_MFPL_onbead_Tpk1_1_2.25767.25767.2	LGNLQNGTEDVKNHPWFK		2	3931.46	1049.03	1050.02	1.9814	1.9837	2098.03	2096.04	1.501e-09	32.804	30.224	1	0		1.9793:Val->Thr (Val->Thr substitution)	0		TRUE	TPK1	sp|P06244|KAPA_YEAST	cAMP-dependent protein kinase type 1
20180918_Lumos_RSLC6_Reiter_Ammerer_MFPL_onbead_Tpk1_1_2.25787.25787.4	LGNLQNGTEDVKNHPWFK		4	3935.55	525.018	525.514	1.9826	1.9849	2098.03	2096.04	2.896e-10	40.153	37.261	1	0		1.9941:Label:15N(2) (15N(2)), 1.9793:Val->Thr (Val->Thr substitution)	0		TRUE	TPK1	sp|P06244|KAPA_YEAST	cAMP-dependent protein kinase type 1
20180918_Lumos_RSLC6_Reiter_Ammerer_MFPL_onbead_Tpk1_1_2.25801.25801.3	LGNLQNGTEDVKNHPWFK		3	3937.31	699.689	700.349	1.9824	1.9847	2098.03	2096.04	2.824e-07	40.278	34.76	1	0		1.9793:Val->Thr (Val->Thr substitution), 1.9941:Label:15N(2) (15N(2))	0		TRUE	TPK1	sp|P06244|KAPA_YEAST	cAMP-dependent protein kinase type 1
20180918_Lumos_RSLC6_Reiter_Ammerer_MFPL_onbead_Tpk1_1_2.25809.25809.3	LGNLQNGTEDVKNHPWFK	LGNLQNGT[181]EDVKNHPWFK	3	3938.32	726.344	707.677	-56.0022	-55.9999	2120.01	2176.01	9.819e-05	29.012	26.545	0.9986	0	8T(79.9663)	Unknown	0		FALSE	TPK1	sp|P06244|KAPA_YEAST	cAMP-dependent protein kinase type 1
20180918_Lumos_RSLC6_Reiter_Ammerer_MFPL_onbead_Tpk1_1_2.25907.25907.2	ITDFGFAK		2	3950.34	449.737	449.736	-0.0014	0.0009	897.458	897.46	0.004599	17.676	13.41	0.9997	0		Unknown	0		FALSE	TPK3	sp|P05986|KAPC_YEAST	cAMP-dependent protein kinase type 3	sp|P06245|KAPB_YEAST, sp|P06244|KAPA_YEAST
20180918_Lumos_RSLC6_Reiter_Ammerer_MFPL_onbead_Tpk1_1_2.26059.26059.4	LGNLQNGTEDVKNHPWFK		4	3969.16	525.018	525.514	1.9836	1.9859	2098.03	2096.04	0.03197	26.082	21.33	0.9966	0		1.9793:Val->Thr (Val->Thr substitution), 1.9941:Label:15N(2) (15N(2))	0		TRUE	TPK1	sp|P06244|KAPA_YEAST	cAMP-dependent protein kinase type 1
20180918_Lumos_RSLC6_Reiter_Ammerer_MFPL_onbead_Tpk1_1_2.26093.26093.2	NGHIKITDFGFAK		2	3973.4	724.388	898.466	348.156	348.159	1794.92	1446.76	0.0776	15.549	12.54	0.9774	0		Unknown	0		FALSE	TPK3	sp|P05986|KAPC_YEAST	cAMP-dependent protein kinase type 3	sp|P06245|KAPB_YEAST, sp|P06244|KAPA_YEAST
20180918_Lumos_RSLC6_Reiter_Ammerer_MFPL_onbead_Tpk1_1_2.26097.26097.2	LGNLQNGTEDVKNHPWFK		2	3973.98	1049.03	1049.52	0.9839	0.9862	2097.03	2096.04	2.626e-09	30.834	25.726	1	0		0.9840:Deamidated (Deamidation), 0.9840:Asn->Asp (Asn->Asp substitution), 0.9840:Gln->Glu (Gln->Glu substitution)	0		TRUE	TPK1	sp|P06244|KAPA_YEAST	cAMP-dependent protein kinase type 1
20180918_Lumos_RSLC6_Reiter_Ammerer_MFPL_onbead_Tpk1_1_2.26100.26100.3	LGNLQNGTEDVKNHPWFK		3	3974.49	699.689	700.35	1.9848	1.9871	2098.03	2096.04	0.0001444	34.847	32.086	1	0		1.9941:Label:15N(2) (15N(2)), 1.9793:Val->Thr (Val->Thr substitution)	0		TRUE	TPK1	sp|P06244|KAPA_YEAST	cAMP-dependent protein kinase type 1
20180918_Lumos_RSLC6_Reiter_Ammerer_MFPL_onbead_Tpk1_1_2.26161.26161.2	ITDFGFAK		2	3982.19	449.737	449.737	-0.0011	0.0012	897.458	897.46	0.01431	17.811	13.521	0.9994	0		Unknown	0		FALSE	TPK3	sp|P05986|KAPC_YEAST	cAMP-dependent protein kinase type 3	sp|P06244|KAPA_YEAST, sp|P06245|KAPB_YEAST
20180918_Lumos_RSLC6_Reiter_Ammerer_MFPL_onbead_Tpk1_1_2.26286.26286.4	LGNLQNGTEDVKNHPWFK		4	3996.89	525.018	525.514	1.9819	1.9842	2098.03	2096.04	0.003121	28.965	24.09	0.9994	0		1.9941:Label:15N(2) (15N(2)), 1.9793:Val->Thr (Val->Thr substitution)	0		TRUE	TPK1	sp|P06244|KAPA_YEAST	cAMP-dependent protein kinase type 1
20180918_Lumos_RSLC6_Reiter_Ammerer_MFPL_onbead_Tpk1_1_2.26318.26318.3	LGNLQNGTEDVKNHPWFK		3	4000.94	699.689	700.682	2.9795	2.9818	2099.02	2096.04	0.0006707	31.183	28.664	0.9978	0		2.9883:Delta:H(1)N(-1)18O(1) (glycosylated asparagine 18O labeling), 2.9883:Deamidated:18O(1) (Deamidation in presence of O18), 2.9911:Label:15N(3) (15N(3)), 2.9819:Gln->Met (Gln->Met substitution)	0		TRUE	TPK1	sp|P06244|KAPA_YEAST	cAMP-dependent protein kinase type 1
20180918_Lumos_RSLC6_Reiter_Ammerer_MFPL_onbead_Tpk1_1_2.26325.26325.4	LGNLQNGTEDVKNHPWFK		4	4001.9	525.018	525.264	0.9831	0.9854	2097.03	2096.04	0.04694	26.521	21.758	0.9984	0		0.9840:Deamidated (Deamidation), 0.9840:Asn->Asp (Asn->Asp substitution), 0.9840:Gln->Glu (Gln->Glu substitution)	0		TRUE	TPK1	sp|P06244|KAPA_YEAST	cAMP-dependent protein kinase type 1
20180918_Lumos_RSLC6_Reiter_Ammerer_MFPL_onbead_Tpk1_1_2.26357.26357.2	QPHVTYYNEEQYK		2	4005.95	849.891	841.399	-16.9844	-16.9821	1680.78	1697.77	0.0001348	20.036	15.074	0.9987	0		-16.9902:Asn->Pro (Asn->Pro substitution)	0		TRUE	TPK1	sp|P06244|KAPA_YEAST	cAMP-dependent protein kinase type 1
20180918_Lumos_RSLC6_Reiter_Ammerer_MFPL_onbead_Tpk1_1_2.26432.26432.2	ITDFGFAK		2	4015.46	449.737	449.736	-0.0014	0.0009	897.458	897.46	0.01003	18.113	13.794	0.9996	0		Unknown	0		FALSE	TPK3	sp|P05986|KAPC_YEAST	cAMP-dependent protein kinase type 3	sp|P06244|KAPA_YEAST, sp|P06245|KAPB_YEAST
20180918_Lumos_RSLC6_Reiter_Ammerer_MFPL_onbead_Tpk1_1_2.26610.26610.4	LGNLQNGTEDVKNHPWFK		4	4037.56	525.018	525.263	0.9787	0.981	2097.02	2096.04	0.08906	24.695	21.882	0.9971	0		0.9840:Deamidated (Deamidation), 0.9840:Asn->Asp (Asn->Asp substitution), 0.9840:Gln->Glu (Gln->Glu substitution)	0		TRUE	TPK1	sp|P06244|KAPA_YEAST	cAMP-dependent protein kinase type 1
20180918_Lumos_RSLC6_Reiter_Ammerer_MFPL_onbead_Tpk1_1_2.26685.26685.2	ITDFGFAK		2	4047.27	449.737	449.736	-0.0013	0.001	897.458	897.46	0.01038	19.454	15.033	0.9995	0		Unknown	0		FALSE	TPK3	sp|P05986|KAPC_YEAST	cAMP-dependent protein kinase type 3	sp|P06244|KAPA_YEAST, sp|P06245|KAPB_YEAST
20180918_Lumos_RSLC6_Reiter_Ammerer_MFPL_onbead_Tpk1_1_2.26703.26703.2	ITDFGFAK		2	4049.39	449.737	450.238	1.0016	1.0039	898.461	897.46	0.008698	18.755	13.908	0.9997	0		0.9970:Label:15N(1) (15N(1))	0		FALSE	TPK3	sp|P05986|KAPC_YEAST	cAMP-dependent protein kinase type 3	sp|P06244|KAPA_YEAST, sp|P06245|KAPB_YEAST
20180918_Lumos_RSLC6_Reiter_Ammerer_MFPL_onbead_Tpk1_1_2.26810.26810.3	LGNLQNGTEDVKNHPWFK		3	4066.19	699.689	700.016	0.9812	0.9835	2097.03	2096.04	4.546e-07	38.94	34.68	1	0		0.9840:Deamidated (Deamidation), 0.9840:Asn->Asp (Asn->Asp substitution), 0.9840:Gln->Glu (Gln->Glu substitution)	0		TRUE	TPK1	sp|P06244|KAPA_YEAST	cAMP-dependent protein kinase type 1
20180918_Lumos_RSLC6_Reiter_Ammerer_MFPL_onbead_Tpk1_1_2.26832.26832.4	LGNLQNGTEDVKNHPWFK		4	4068.93	525.018	525.514	1.9831	1.9854	2098.03	2096.04	5.084e-07	38.34	35.508	1	0		1.9941:Label:15N(2) (15N(2)), 1.9793:Val->Thr (Val->Thr substitution)	0		TRUE	TPK1	sp|P06244|KAPA_YEAST	cAMP-dependent protein kinase type 1
20180918_Lumos_RSLC6_Reiter_Ammerer_MFPL_onbead_Tpk1_1_2.26855.26855.3	QPHVTYYNEEQYKQFIAQAR		3	4071.79	838.412	839.078	1.9975	1.9998	2514.21	2512.21	1e-15	51.589	39.721	1	0		2.0042:Label:18O(1) (O18 Labeling), 1.9941:Label:15N(2) (15N(2)), 1.9979:Glu->Met (Glu->Met substitution)	0		TRUE	TPK1	sp|P06244|KAPA_YEAST	cAMP-dependent protein kinase type 1
20180918_Lumos_RSLC6_Reiter_Ammerer_MFPL_onbead_Tpk1_1_2.26870.26870.2	LGNLQNGTEDVKNHPWFK		2	4073.58	1049.03	1049.52	0.9841	0.9864	2097.03	2096.04	2.557e-08	29.276	26.628	1	0		0.9840:Deamidated (Deamidation), 0.9840:Asn->Asp (Asn->Asp substitution), 0.9840:Gln->Glu (Gln->Glu substitution)	0		TRUE	TPK1	sp|P06244|KAPA_YEAST	cAMP-dependent protein kinase type 1
20180918_Lumos_RSLC6_Reiter_Ammerer_MFPL_onbead_Tpk1_1_2.26879.26879.2	LGNLQNGTEDVKNHPWFK		2	4074.86	1049.03	1050.02	1.9836	1.9859	2098.03	2096.04	1.887e-09	32.114	27.015	1	0		1.9941:Label:15N(2) (15N(2)), 1.9793:Val->Thr (Val->Thr substitution)	0		TRUE	TPK1	sp|P06244|KAPA_YEAST	cAMP-dependent protein kinase type 1
20180918_Lumos_RSLC6_Reiter_Ammerer_MFPL_onbead_Tpk1_1_2.26915.26915.2	ITDFGFAK		2	4079.56	449.737	449.736	-0.0014	0.0009	897.458	897.46	0.01742	18.855	14.457	0.9993	0		Unknown	0		FALSE	TPK3	sp|P05986|KAPC_YEAST	cAMP-dependent protein kinase type 3	sp|P06244|KAPA_YEAST, sp|P06245|KAPB_YEAST
20180918_Lumos_RSLC6_Reiter_Ammerer_MFPL_onbead_Tpk1_1_2.27082.27082.4	LGNLQNGTEDVKNHPWFK		4	4100.93	525.018	525.263	0.9794	0.9817	2097.02	2096.04	0.7897	20.737	20.259	0.957	0		0.9840:Deamidated (Deamidation), 0.9840:Asn->Asp (Asn->Asp substitution), 0.9840:Gln->Glu (Gln->Glu substitution)	0		TRUE	TPK1	sp|P06244|KAPA_YEAST	cAMP-dependent protein kinase type 1
20180918_Lumos_RSLC6_Reiter_Ammerer_MFPL_onbead_Tpk1_1_2.27311.27311.2	ITDFGFAK		2	4129.82	449.737	449.736	-0.0012	0.0011	897.458	897.46	0.01828	18.564	14.274	0.9993	0		Unknown	0		FALSE	TPK3	sp|P05986|KAPC_YEAST	cAMP-dependent protein kinase type 3	sp|P06244|KAPA_YEAST, sp|P06245|KAPB_YEAST
20180918_Lumos_RSLC6_Reiter_Ammerer_MFPL_onbead_Tpk1_1_2.27452.27452.2	ITDFGFAK		2	4147.85	449.737	449.21	-1.0547	-1.0524	896.405	897.46	0.03437	18.52	15.429	0.9767	0		Unknown	0		FALSE	TPK3	sp|P05986|KAPC_YEAST	cAMP-dependent protein kinase type 3	sp|P06244|KAPA_YEAST, sp|P06245|KAPB_YEAST
20180918_Lumos_RSLC6_Reiter_Ammerer_MFPL_onbead_Tpk1_1_2.28288.28288.4	DLKPENILLDKNGHIK		4	4254.29	462.515	473.266	43.0043	43.0066	1889.04	1846.03	0.0007384	29.19	28.951	0.9996	0		43.0058:Carbamyl (Carbamylation), 43.0058:Ala->Asn (Ala->Asn substitution)	0		FALSE	TPK3	sp|P05986|KAPC_YEAST	cAMP-dependent protein kinase type 3	sp|P06244|KAPA_YEAST
20180918_Lumos_RSLC6_Reiter_Ammerer_MFPL_onbead_Tpk1_1_2.28309.28309.3	DLKPENILLDKNGHIK		3	4257.01	616.351	631.02	44.0058	44.0081	1890.04	1846.03	0.0002866	32.572	21.358	0.9979	0		44.0173:Acetyl:13C(2) (heavy acetylation), 44.0085:Delta:H(4)C(2)O(-1)S(1) (S-Ethylcystine from Serine), 44.0085:Ser->Met (Ser->Met substitution)	0		FALSE	TPK3	sp|P05986|KAPC_YEAST	cAMP-dependent protein kinase type 3	sp|P06244|KAPA_YEAST
20180918_Lumos_RSLC6_Reiter_Ammerer_MFPL_onbead_Tpk1_1_2.28476.28476.2	ITDFGFAK		2	4277.72	449.737	449.737	-0.0009	0.0014	897.459	897.46	0.0122	16.646	12.749	0.9995	0		Unknown	0		FALSE	TPK3	sp|P05986|KAPC_YEAST	cAMP-dependent protein kinase type 3	sp|P06244|KAPA_YEAST, sp|P06245|KAPB_YEAST
20180918_Lumos_RSLC6_Reiter_Ammerer_MFPL_onbead_Tpk1_1_2.28552.28552.4	LGNLQNGTEDVKNHPWFK		4	4287.44	525.018	525.76	2.9682	2.9705	2099.01	2096.04	0.000202	29.203	24.268	1	0		Unknown	0		TRUE	TPK1	sp|P06244|KAPA_YEAST	cAMP-dependent protein kinase type 1
20180918_Lumos_RSLC6_Reiter_Ammerer_MFPL_onbead_Tpk1_1_2.28797.28797.2	DLKPENILLDK		2	4318.45	649.372	649.369	-0.0065	-0.0042	1296.72	1296.73	9.843e-05	18.362	10.873	0.9999	0		Unknown	0		FALSE	TPK3	sp|P05986|KAPC_YEAST	cAMP-dependent protein kinase type 3	sp|P06244|KAPA_YEAST, sp|P34244|HSL1_YEAST, sp|P38147|CHK1_YEAST, sp|Q03407|PKH1_YEAST
20180918_Lumos_RSLC6_Reiter_Ammerer_MFPL_onbead_Tpk1_1_2.28821.28821.3	DLKPENILLDK		3	4321.21	433.25	433.25	-0.0015	0.0008	1296.73	1296.73	2.968e-05	36.943	36.943	1	0		Unknown	0		FALSE	TPK3	sp|P05986|KAPC_YEAST	cAMP-dependent protein kinase type 3	sp|P38147|CHK1_YEAST, sp|Q03407|PKH1_YEAST, sp|P06244|KAPA_YEAST, sp|P34244|HSL1_YEAST
20180918_Lumos_RSLC6_Reiter_Ammerer_MFPL_onbead_Tpk1_1_2.28903.28903.2	DLKPENILLDK		2	4331.42	649.372	535.316	-228.112	-228.109	1068.62	1296.73	0.04503	18.439	14.847	0.8463	0		Unknown	0		FALSE	TPK3	sp|P05986|KAPC_YEAST	cAMP-dependent protein kinase type 3	sp|P06244|KAPA_YEAST, sp|P34244|HSL1_YEAST, sp|P38147|CHK1_YEAST, sp|Q03407|PKH1_YEAST
20180918_Lumos_RSLC6_Reiter_Ammerer_MFPL_onbead_Tpk1_1_2.28958.28958.2	DLKPENILLDK		2	4340.01	649.372	592.36	-114.024	-114.022	1182.7	1296.73	0.03223	16.598	12.241	0.747	0		Unknown	0		FALSE	TPK3	sp|P05986|KAPC_YEAST	cAMP-dependent protein kinase type 3	sp|P06244|KAPA_YEAST, sp|P34244|HSL1_YEAST, sp|P38147|CHK1_YEAST, sp|Q03407|PKH1_YEAST
20180918_Lumos_RSLC6_Reiter_Ammerer_MFPL_onbead_Tpk1_1_2.28983.28983.2	DLKPENILLDK		2	4344.67	649.372	649.86	0.9756	0.9779	1297.7	1296.73	0.0008372	22.788	22.788	1	0		0.9840:Asn->Asp (Asn->Asp substitution), 0.9840:Gln->Glu (Gln->Glu substitution), 0.9840:Deamidated (Deamidation)	0		FALSE	TPK3	sp|P05986|KAPC_YEAST	cAMP-dependent protein kinase type 3	sp|P34244|HSL1_YEAST, sp|P38147|CHK1_YEAST, sp|Q03407|PKH1_YEAST, sp|P06244|KAPA_YEAST
20180918_Lumos_RSLC6_Reiter_Ammerer_MFPL_onbead_Tpk1_1_2.29037.29037.3	DLKPENILLDK		3	4351.22	433.25	433.25	-0.0019	0.0004	1296.73	1296.73	2.871e-05	36.948	36.948	0.9999	0		Unknown	0		FALSE	TPK3	sp|P05986|KAPC_YEAST	cAMP-dependent protein kinase type 3	sp|P06244|KAPA_YEAST, sp|P34244|HSL1_YEAST, sp|P38147|CHK1_YEAST, sp|Q03407|PKH1_YEAST
20180918_Lumos_RSLC6_Reiter_Ammerer_MFPL_onbead_Tpk1_1_2.29173.29173.2	DLKPENILLDK		2	4367.43	649.372	649.371	-0.0022	0.0001	1296.73	1296.73	2.688e-06	29.329	26.163	1	0		Unknown	0		FALSE	TPK3	sp|P05986|KAPC_YEAST	cAMP-dependent protein kinase type 3	sp|Q03407|PKH1_YEAST, sp|P06244|KAPA_YEAST, sp|P34244|HSL1_YEAST, sp|P38147|CHK1_YEAST
20180918_Lumos_RSLC6_Reiter_Ammerer_MFPL_onbead_Tpk1_1_2.29236.29236.2	DLKPENILLDK		2	4375.65	649.372	649.859	0.975	0.9773	1297.7	1296.73	4.655e-05	25.122	22.838	1	0		0.9840:Gln->Glu (Gln->Glu substitution), 0.9840:Deamidated (Deamidation), 0.9840:Asn->Asp (Asn->Asp substitution)	0		FALSE	TPK3	sp|P05986|KAPC_YEAST	cAMP-dependent protein kinase type 3	sp|P06244|KAPA_YEAST, sp|P34244|HSL1_YEAST, sp|P38147|CHK1_YEAST, sp|Q03407|PKH1_YEAST
20180918_Lumos_RSLC6_Reiter_Ammerer_MFPL_onbead_Tpk1_1_2.29274.29274.3	DLKPENILLDK		3	4381.98	433.25	433.25	-0.0013	0.001	1296.73	1296.73	1.165e-05	35.036	20.928	1	0		Unknown	0		FALSE	TPK3	sp|P05986|KAPC_YEAST	cAMP-dependent protein kinase type 3	sp|P06244|KAPA_YEAST, sp|P34244|HSL1_YEAST, sp|P38147|CHK1_YEAST, sp|Q03407|PKH1_YEAST
20180918_Lumos_RSLC6_Reiter_Ammerer_MFPL_onbead_Tpk1_1_2.29378.29378.2	ITDFGFAK		2	4394.82	449.737	449.737	-0.0007	0.0016	897.459	897.46	0.007241	17.143	12.804	0.9996	0		Unknown	0		FALSE	TPK3	sp|P05986|KAPC_YEAST	cAMP-dependent protein kinase type 3	sp|P06244|KAPA_YEAST, sp|P06245|KAPB_YEAST
20180918_Lumos_RSLC6_Reiter_Ammerer_MFPL_onbead_Tpk1_1_2.29617.29617.2	ITDFGFAK		2	4425.41	449.737	449.736	-0.0012	0.0011	897.458	897.46	1.077	14.436	12.603	0.9667	0		Unknown	0		FALSE	TPK3	sp|P05986|KAPC_YEAST	cAMP-dependent protein kinase type 3	sp|P06244|KAPA_YEAST, sp|P06245|KAPB_YEAST
20180918_Lumos_RSLC6_Reiter_Ammerer_MFPL_onbead_Tpk1_1_2.29634.29634.2	ITDFGFAK		2	4427.44	449.737	449.737	-0.0008	0.0015	897.459	897.46	1.268	13.289	11.971	0.961	0		Unknown	0		FALSE	TPK3	sp|P05986|KAPC_YEAST	cAMP-dependent protein kinase type 3	sp|P06244|KAPA_YEAST, sp|P06245|KAPB_YEAST
20180918_Lumos_RSLC6_Reiter_Ammerer_MFPL_onbead_Tpk1_1_2.29734.29734.3	DLKPENILLDK		3	4438.65	433.25	433.249	-0.0024	-0.0001	1296.73	1296.73	0.0001388	32.983	22.607	1	0		Unknown	0		FALSE	TPK3	sp|P05986|KAPC_YEAST	cAMP-dependent protein kinase type 3	sp|P38147|CHK1_YEAST, sp|Q03407|PKH1_YEAST, sp|P06244|KAPA_YEAST, sp|P34244|HSL1_YEAST
20180918_Lumos_RSLC6_Reiter_Ammerer_MFPL_onbead_Tpk1_1_2.29892.29892.3	DLKPENILLDK		3	4458.92	433.25	433.164	-0.2582	-0.2559	1296.47	1296.73	0.01832	17.639	13.703	0.999	0		Unknown	0		FALSE	TPK3	sp|P05986|KAPC_YEAST	cAMP-dependent protein kinase type 3	sp|P06244|KAPA_YEAST, sp|P34244|HSL1_YEAST, sp|P38147|CHK1_YEAST, sp|Q03407|PKH1_YEAST
20180918_Lumos_RSLC6_Reiter_Ammerer_MFPL_onbead_Tpk1_1_2.30041.30041.4	LMLSIVTHPFIIR		4	4477.98	385.733	399.987	57.0192	57.0215	1595.92	1538.9	0.005389	25.687	23.833	0.9908	0		57.0215:Carbamidomethyl (Iodoacetamide derivative), 57.0215:Ala->Gln (Ala->Gln substitution), 57.0215:Gly->Asn (Gly->Asn substitution), 57.0215:Gly (Addition of Glycine)	0		FALSE	TPK1	sp|P06244|KAPA_YEAST	cAMP-dependent protein kinase type 1
20180918_Lumos_RSLC6_Reiter_Ammerer_MFPL_onbead_Tpk1_1_2.30242.30242.3	QPHVTYYNEEQYKQFIAQAR	QPHVT[181]Y[243]Y[243]NEEQYKQFIAQAR	3	4503.65	918.378	1076.19	473.437	473.439	3225.55	2752.11	0.007444	21.168	15.722	0.6934	0	5T(79.9663), 6Y(79.9663), 7Y(79.9663)	Unknown	0		FALSE	TPK1	sp|P06244|KAPA_YEAST	cAMP-dependent protein kinase type 1
20180918_Lumos_RSLC6_Reiter_Ammerer_MFPL_onbead_Tpk1_1_2.30334.30334.2	DLKPENILLDK		2	4515.72	649.372	678.392	58.041	58.0433	1354.77	1296.73	2.097	9.926	9.009	0.7429	0		58.0419:Delta:H(6)C(3)O(1) (Reduced acrolein addition +58)	0		FALSE	TPK3	sp|P05986|KAPC_YEAST	cAMP-dependent protein kinase type 3	sp|P06244|KAPA_YEAST, sp|P34244|HSL1_YEAST, sp|P38147|CHK1_YEAST, sp|Q03407|PKH1_YEAST
20180918_Lumos_RSLC6_Reiter_Ammerer_MFPL_onbead_Tpk1_1_2.30372.30372.3	DLKPENILLDK		3	4520.34	433.25	452.257	57.0199	57.0222	1353.75	1296.73	0.04077	23.092	18.131	0.9272	0		57.0215:Gly->Asn (Gly->Asn substitution), 57.0215:Gly (Addition of Glycine), 57.0215:Carbamidomethyl (Iodoacetamide derivative), 57.0215:Ala->Gln (Ala->Gln substitution)	0		FALSE	TPK3	sp|P05986|KAPC_YEAST	cAMP-dependent protein kinase type 3	sp|P06244|KAPA_YEAST, sp|P34244|HSL1_YEAST, sp|P38147|CHK1_YEAST, sp|Q03407|PKH1_YEAST
20180918_Lumos_RSLC6_Reiter_Ammerer_MFPL_onbead_Tpk1_1_2.30540.30540.3	DLKPENILLDK		3	4541.76	433.25	433.25	-0.0014	0.0009	1296.73	1296.73	0.001473	23.844	17.778	0.9999	0		Unknown	0		FALSE	TPK3	sp|P05986|KAPC_YEAST	cAMP-dependent protein kinase type 3	sp|P06244|KAPA_YEAST, sp|P34244|HSL1_YEAST, sp|P38147|CHK1_YEAST, sp|Q03407|PKH1_YEAST
20180918_Lumos_RSLC6_Reiter_Ammerer_MFPL_onbead_Tpk1_1_2.30778.30778.3	DLKPENILLDK		3	4573.71	433.25	433.25	-0.0011	0.0012	1296.73	1296.73	0.1222	23.624	20.851	0.9928	0		Unknown	0		FALSE	TPK3	sp|P05986|KAPC_YEAST	cAMP-dependent protein kinase type 3	sp|Q03407|PKH1_YEAST, sp|P06244|KAPA_YEAST, sp|P34244|HSL1_YEAST, sp|P38147|CHK1_YEAST
20180918_Lumos_RSLC6_Reiter_Ammerer_MFPL_onbead_Tpk1_1_2.31024.31024.3	DLKPENILLDK		3	4606.36	433.25	433.25	-0.002	0.0003	1296.73	1296.73	0.03076	25.433	20.87	0.9981	0		Unknown	0		FALSE	TPK3	sp|P05986|KAPC_YEAST	cAMP-dependent protein kinase type 3	sp|Q03407|PKH1_YEAST, sp|P06244|KAPA_YEAST, sp|P34244|HSL1_YEAST, sp|P38147|CHK1_YEAST
20180918_Lumos_RSLC6_Reiter_Ammerer_MFPL_onbead_Tpk1_1_2.31119.31119.3	DLKPENILLDK		3	4618.06	433.25	433.902	1.9565	1.9588	1298.69	1296.73	0.2557	23.07	20.913	0.9831	0		1.9615:Thr->Cys (Thr->Cys substitution)	0		FALSE	TPK3	sp|P05986|KAPC_YEAST	cAMP-dependent protein kinase type 3	sp|P34244|HSL1_YEAST, sp|P38147|CHK1_YEAST, sp|Q03407|PKH1_YEAST, sp|P06244|KAPA_YEAST
20180918_Lumos_RSLC6_Reiter_Ammerer_MFPL_onbead_Tpk1_1_2.31212.31212.2	ITDFGFAK		2	4629.78	449.737	449.737	-0.0011	0.0012	897.459	897.46	0.01811	17.278	13.404	0.9993	0		Unknown	0		FALSE	TPK3	sp|P05986|KAPC_YEAST	cAMP-dependent protein kinase type 3	sp|P06244|KAPA_YEAST, sp|P06245|KAPB_YEAST
20180918_Lumos_RSLC6_Reiter_Ammerer_MFPL_onbead_Tpk1_1_2.31255.31255.3	NIETPYEPPIQQGQGDTSQFDK		3	4635.04	831.391	831.39	-0.002	0.0003	2491.15	2491.15	2.302e-10	43.715	41.144	1	0		Unknown	0		TRUE	TPK1	sp|P06244|KAPA_YEAST	cAMP-dependent protein kinase type 1
20180918_Lumos_RSLC6_Reiter_Ammerer_MFPL_onbead_Tpk1_1_2.31288.31288.3	DLKPENILLDK		3	4639.21	433.25	433.249	-0.0024	-0.0001	1296.73	1296.73	0.02149	24.774	20.732	0.9988	0		Unknown	0		FALSE	TPK3	sp|P05986|KAPC_YEAST	cAMP-dependent protein kinase type 3	sp|P38147|CHK1_YEAST, sp|Q03407|PKH1_YEAST, sp|P06244|KAPA_YEAST, sp|P34244|HSL1_YEAST
20180918_Lumos_RSLC6_Reiter_Ammerer_MFPL_onbead_Tpk1_1_2.31318.31318.2	NIETPYEPPIQQGQGDTSQFDK		2	4642.73	1246.58	1247.08	1.0029	1.0052	2492.15	2491.15	2.489e-13	42.102	38.972	1	0		0.9970:Label:15N(1) (15N(1))	0		TRUE	TPK1	sp|P06244|KAPA_YEAST	cAMP-dependent protein kinase type 1
20180918_Lumos_RSLC6_Reiter_Ammerer_MFPL_onbead_Tpk1_1_2.31445.31445.3	DLKPENILLDK		3	4658.58	433.25	432.889	-1.085	-1.0827	1295.64	1296.73	1.12	17.412	15.114	0.2329	0		Unknown	0		FALSE	TPK3	sp|P05986|KAPC_YEAST	cAMP-dependent protein kinase type 3	sp|P06244|KAPA_YEAST, sp|P34244|HSL1_YEAST, sp|P38147|CHK1_YEAST, sp|Q03407|PKH1_YEAST
20180918_Lumos_RSLC6_Reiter_Ammerer_MFPL_onbead_Tpk1_1_2.31454.31454.2	NIETPYEPPIQQGQGDTSQFDK		2	4659.63	1246.58	1247.08	1.0019	1.0042	2492.15	2491.15	2.966e-14	44.901	41.776	1	0		0.9970:Label:15N(1) (15N(1))	0		TRUE	TPK1	sp|P06244|KAPA_YEAST	cAMP-dependent protein kinase type 1
20180918_Lumos_RSLC6_Reiter_Ammerer_MFPL_onbead_Tpk1_1_2.31529.31529.3	NIETPYEPPIQQGQGDTSQFDK		3	4668.8	831.391	831.388	-0.0081	-0.0058	2491.14	2491.15	1.09e-12	54.107	52.672	1	0		Unknown	0		TRUE	TPK1	sp|P06244|KAPA_YEAST	cAMP-dependent protein kinase type 1
20180918_Lumos_RSLC6_Reiter_Ammerer_MFPL_onbead_Tpk1_1_2.31618.31618.3	DLKPENILLDK		3	4679.97	433.25	433.902	1.9565	1.9588	1298.69	1296.73	1.591	20.978	20.951	0.8437	0		1.9615:Thr->Cys (Thr->Cys substitution)	0		FALSE	TPK3	sp|P05986|KAPC_YEAST	cAMP-dependent protein kinase type 3	sp|P38147|CHK1_YEAST, sp|Q03407|PKH1_YEAST, sp|P06244|KAPA_YEAST, sp|P34244|HSL1_YEAST
20180918_Lumos_RSLC6_Reiter_Ammerer_MFPL_onbead_Tpk1_1_2.31927.31927.3	DLKPENILLDK		3	4717.39	433.25	433.909	1.9774	1.9797	1298.71	1296.73	2.235	16.784	16.072	0.8266	0		1.9793:Val->Thr (Val->Thr substitution)	0		FALSE	TPK3	sp|P05986|KAPC_YEAST	cAMP-dependent protein kinase type 3	sp|P06244|KAPA_YEAST, sp|P34244|HSL1_YEAST, sp|P38147|CHK1_YEAST, sp|Q03407|PKH1_YEAST
20180918_Lumos_RSLC6_Reiter_Ammerer_MFPL_onbead_Tpk1_1_2.32568.32568.3	VTSGKYSLQDFQILR		3	4800.42	585.653	604.659	57.0192	57.0215	1810.96	1753.94	0.07993	27.538	26.194	0.6632	0		57.0215:Gly (Addition of Glycine), 57.0215:Carbamidomethyl (Iodoacetamide derivative), 57.0215:Ala->Gln (Ala->Gln substitution), 57.0215:Gly->Asn (Gly->Asn substitution)	0		TRUE	TPK1	sp|P06244|KAPA_YEAST	cAMP-dependent protein kinase type 1
20180918_Lumos_RSLC6_Reiter_Ammerer_MFPL_onbead_Tpk1_1_2.32652.32652.2	VTSGKYSLQDFQILR		2	4810.73	877.976	877.975	-0.0016	0.0007	1753.93	1753.94	3.031e-06	38.666	28.385	1	0		Unknown	0		TRUE	TPK1	sp|P06244|KAPA_YEAST	cAMP-dependent protein kinase type 1
20180918_Lumos_RSLC6_Reiter_Ammerer_MFPL_onbead_Tpk1_1_2.32782.32782.2	ITDFGFAK		2	4826.89	449.737	449.737	-0.0012	0.0011	897.458	897.46	0.05151	17.513	14.43	0.9985	0		Unknown	0		FALSE	TPK3	sp|P05986|KAPC_YEAST	cAMP-dependent protein kinase type 3	sp|P06244|KAPA_YEAST, sp|P06245|KAPB_YEAST
20180918_Lumos_RSLC6_Reiter_Ammerer_MFPL_onbead_Tpk1_1_2.33223.33223.3	DLKPENILLDK		3	4879.66	433.25	433.25	-0.0014	0.0009	1296.73	1296.73	0.04647	23.861	20.1	0.9969	0		Unknown	0		FALSE	TPK3	sp|P05986|KAPC_YEAST	cAMP-dependent protein kinase type 3	sp|Q03407|PKH1_YEAST, sp|P06244|KAPA_YEAST, sp|P34244|HSL1_YEAST, sp|P38147|CHK1_YEAST
20180918_Lumos_RSLC6_Reiter_Ammerer_MFPL_onbead_Tpk1_1_2.33296.33296.2	ITDFGFAK		2	4888.4	449.737	449.737	-0.0011	0.0012	897.458	897.46	0.006012	18.402	13.515	0.9997	0		Unknown	0		FALSE	TPK3	sp|P05986|KAPC_YEAST	cAMP-dependent protein kinase type 3	sp|P06244|KAPA_YEAST, sp|P06245|KAPB_YEAST
20180918_Lumos_RSLC6_Reiter_Ammerer_MFPL_onbead_Tpk1_1_2.33402.33402.3	QPHVTYYNEEQYKQFIAQAR		3	4901.14	838.412	853.081	44.0073	44.0096	2556.22	2512.21	2.247e-08	36.155	29.283	1	0		44.0085:Delta:H(4)C(2)O(-1)S(1) (S-Ethylcystine from Serine), 44.0085:Ser->Met (Ser->Met substitution), 44.0173:Acetyl:13C(2) (heavy acetylation)	0		TRUE	TPK1	sp|P06244|KAPA_YEAST	cAMP-dependent protein kinase type 1
20180918_Lumos_RSLC6_Reiter_Ammerer_MFPL_onbead_Tpk1_1_2.33404.33404.3	QPHVTYYNEEQYKQFIAQAR		3	4901.35	838.412	853.413	45.0046	45.0069	2557.22	2512.21	3.27e-06	33.746	29.212	0.9925	0		Unknown	0		TRUE	TPK1	sp|P06244|KAPA_YEAST	cAMP-dependent protein kinase type 1
20180918_Lumos_RSLC6_Reiter_Ammerer_MFPL_onbead_Tpk1_1_2.33446.33446.3	QPHVTYYNEEQYKQFIAQAR		3	4906.24	838.412	832.736	-17.0259	-17.0236	2495.19	2512.21	1.813e-15	47.105	38.608	1	0		-17.0265:Gln->pyro-Glu (Pyro-glu from Q), -17.0265:Ammonia-loss (Loss of ammonia)	0		TRUE	TPK1	sp|P06244|KAPA_YEAST	cAMP-dependent protein kinase type 1
20180918_Lumos_RSLC6_Reiter_Ammerer_MFPL_onbead_Tpk1_1_2.35054.35054.2	ITDFGFAK		2	5108.77	449.737	449.737	-0.001	0.0013	897.459	897.46	0.01666	16.234	12.326	0.9994	0		Unknown	0		FALSE	TPK3	sp|P05986|KAPC_YEAST	cAMP-dependent protein kinase type 3	sp|P06245|KAPB_YEAST, sp|P06244|KAPA_YEAST
20180918_Lumos_RSLC6_Reiter_Ammerer_MFPL_onbead_Tpk1_1_2.35125.35125.2	QPHVTYYNEEQYK		2	5117.65	849.891	849.891	-0.0016	0.0007	1697.77	1697.77	4.08e-07	27.761	18.723	1	0		Unknown	0		TRUE	TPK1	sp|P06244|KAPA_YEAST	cAMP-dependent protein kinase type 1
20180918_Lumos_RSLC6_Reiter_Ammerer_MFPL_onbead_Tpk1_1_2.35398.35398.2	ITDFGFAK		2	5150.67	449.737	449.736	-0.0021	0.0002	897.458	897.46	0.007552	16.355	12.442	0.9996	0		Unknown	0		FALSE	TPK3	sp|P05986|KAPC_YEAST	cAMP-dependent protein kinase type 3	sp|P06244|KAPA_YEAST, sp|P06245|KAPB_YEAST
20180918_Lumos_RSLC6_Reiter_Ammerer_MFPL_onbead_Tpk1_1_2.35492.35492.2	ITDFGFAK		2	5162.36	449.737	449.737	-0.0009	0.0014	897.459	897.46	0.006311	16.448	12.506	0.9997	0		Unknown	0		FALSE	TPK3	sp|P05986|KAPC_YEAST	cAMP-dependent protein kinase type 3	sp|P06244|KAPA_YEAST, sp|P06245|KAPB_YEAST
20180918_Lumos_RSLC6_Reiter_Ammerer_MFPL_onbead_Tpk1_1_2.35704.35704.4	LGNLQNGTEDVKNHPWFK		4	5188.69	525.018	565.795	163.105	163.108	2259.15	2096.04	0.0001948	25.927	16.505	1	0		Unknown	0		TRUE	TPK1	sp|P06244|KAPA_YEAST	cAMP-dependent protein kinase type 1
20180918_Lumos_RSLC6_Reiter_Ammerer_MFPL_onbead_Tpk1_1_2.35716.35716.3	LGNLQNGTEDVKNHPWFK		3	5189.91	699.689	753.723	162.103	162.105	2258.15	2096.04	0.0216	22.957	17.179	0.9682	0		Unknown	0		TRUE	TPK1	sp|P06244|KAPA_YEAST	cAMP-dependent protein kinase type 1
20180918_Lumos_RSLC6_Reiter_Ammerer_MFPL_onbead_Tpk1_3_3.41922.41922.4	YVPDVTYTLCGTPDYIAPEVVSTKPYNK		4	6185.08	784.141	880.901	387.038	387.04	3519.57	3132.54	5.321e-10	41.427	41.427	1	0		Unknown	0		FALSE	TPK3	sp|P05986|KAPC_YEAST	cAMP-dependent protein kinase type 3	sp|P06244|KAPA_YEAST
20180918_Lumos_RSLC6_Reiter_Ammerer_MFPL_onbead_Tpk1_1_2.36321.36321.2	ITDFGFAK		2	5266.4	449.737	449.748	0.0213	0.0236	897.481	897.46	0.9327	15.55	13.179	0.9714	0		Unknown	0		FALSE	TPK3	sp|P05986|KAPC_YEAST	cAMP-dependent protein kinase type 3	sp|P06245|KAPB_YEAST, sp|P06244|KAPA_YEAST
20180918_Lumos_RSLC6_Reiter_Ammerer_MFPL_onbead_Tpk1_1_2.36528.36528.2	FPPFFNEDVK		2	5291.6	620.306	620.305	-0.0019	0.0004	1238.6	1238.6	1.783e-07	24.243	11.42	1	0		Unknown	0		TRUE	TPK1	sp|P06244|KAPA_YEAST	cAMP-dependent protein kinase type 1
20180918_Lumos_RSLC6_Reiter_Ammerer_MFPL_onbead_Tpk1_1_2.36771.36771.2	FPPFFNEDVK		2	5321.84	620.306	620.305	-0.002	0.0003	1238.6	1238.6	1.53e-07	24.239	11.398	1	0		Unknown	0		TRUE	TPK1	sp|P06244|KAPA_YEAST	cAMP-dependent protein kinase type 1
20180918_Lumos_RSLC6_Reiter_Ammerer_MFPL_onbead_Tpk1_1_2.36854.36854.2	FPPFFNEDVK		2	5332.43	620.306	498.743	-243.127	-243.124	995.47	1238.6	0.03473	17.288	13.911	0.5422	0		Unknown	0		TRUE	TPK1	sp|P06244|KAPA_YEAST	cAMP-dependent protein kinase type 1
20180918_Lumos_RSLC6_Reiter_Ammerer_MFPL_onbead_Tpk1_1_2.37013.37013.2	FPPFFNEDVK		2	5352.47	620.306	620.305	-0.0021	0.0002	1238.59	1238.6	1.668e-07	24.237	11.387	1	0		Unknown	0		TRUE	TPK1	sp|P06244|KAPA_YEAST	cAMP-dependent protein kinase type 1
20180918_Lumos_RSLC6_Reiter_Ammerer_MFPL_onbead_Tpk1_1_2.37042.37042.2	FPPFFNEDVK		2	5356	620.306	546.57	-147.472	-147.469	1091.13	1238.6	7.674e-05	20.736	12.954	0.9674	0		Unknown	0		TRUE	TPK1	sp|P06244|KAPA_YEAST	cAMP-dependent protein kinase type 1
20180918_Lumos_RSLC6_Reiter_Ammerer_MFPL_onbead_Tpk1_1_2.37241.37241.2	FPPFFNEDVK		2	5382.75	620.306	620.807	1.0017	1.004	1239.6	1238.6	1.563e-07	24.395	11.797	1	0		0.9970:Label:15N(1) (15N(1))	0		TRUE	TPK1	sp|P06244|KAPA_YEAST	cAMP-dependent protein kinase type 1
20180918_Lumos_RSLC6_Reiter_Ammerer_MFPL_onbead_Tpk1_1_2.37439.37439.3	LMLSIVTHPFIIR	LM[147]LSIVTHPFIIR	3	5407.23	519.306	519.305	-0.0013	0.001	1554.89	1554.9	2.277e-08	45.428	36.728	1	0	2M(15.9949)	Unknown	0		TRUE	TPK1	sp|P06244|KAPA_YEAST	cAMP-dependent protein kinase type 1
20180918_Lumos_RSLC6_Reiter_Ammerer_MFPL_onbead_Tpk1_1_2.37462.37462.2	LMLSIVTHPFIIR	LM[147]LSIVTHPFIIR	2	5410.08	778.455	778.454	-0.0017	0.0006	1554.89	1554.9	1.239e-07	32.563	22.121	1	0	2M(15.9949)	Unknown	0		TRUE	TPK1	sp|P06244|KAPA_YEAST	cAMP-dependent protein kinase type 1
20180918_Lumos_RSLC6_Reiter_Ammerer_MFPL_onbead_Tpk1_1_2.37500.37500.2	FPPFFNEDVK		2	5414.53	620.306	620.305	-0.0012	0.0011	1238.6	1238.6	1.715e-07	24.214	11.373	1	0		Unknown	0		TRUE	TPK1	sp|P06244|KAPA_YEAST	cAMP-dependent protein kinase type 1
20180918_Lumos_RSLC6_Reiter_Ammerer_MFPL_onbead_Tpk1_1_2.37651.37651.3	FPPFFNEDVK		3	5433.19	413.873	497.973	252.299	252.301	1490.9	1238.6	0.0005841	22.512	15.787	0.9879	0		Unknown	0		FALSE	TPK1	sp|P06244|KAPA_YEAST	cAMP-dependent protein kinase type 1
20180918_Lumos_RSLC6_Reiter_Ammerer_MFPL_onbead_Tpk1_1_2.37671.37671.2	FPPFFNEDVK		2	5435.65	620.306	621.809	3.0068	3.0091	1241.6	1238.6	0.01821	15.696	15.007	0.995	0		3.0188:Label:2H(3) (Trideuteration), 3.0101:Label:13C(3) (13C3 label for SILAC)	0		TRUE	TPK1	sp|P06244|KAPA_YEAST	cAMP-dependent protein kinase type 1
20180918_Lumos_RSLC6_Reiter_Ammerer_MFPL_onbead_Tpk1_1_2.37707.37707.3	LMLSIVTHPFIIR	LM[147]LSIVTHPFIIR	3	5439.78	519.306	519.305	-0.0017	0.0006	1554.89	1554.9	3.173e-08	45.264	36.727	1	0	2M(15.9949)	Unknown	0		TRUE	TPK1	sp|P06244|KAPA_YEAST	cAMP-dependent protein kinase type 1
20180918_Lumos_RSLC6_Reiter_Ammerer_MFPL_onbead_Tpk1_1_2.37762.37762.2	FPPFFNEDVK		2	5446.27	620.306	620.305	-0.0012	0.0011	1238.6	1238.6	9.65e-06	20.842	12.392	1	0		Unknown	0		TRUE	TPK1	sp|P06244|KAPA_YEAST	cAMP-dependent protein kinase type 1
20180918_Lumos_RSLC6_Reiter_Ammerer_MFPL_onbead_Tpk1_1_2.37874.37874.3	FPPFFNEDVK		3	5459.51	413.873	498.247	253.123	253.125	1491.72	1238.6	0.002206	21.443	16.592	0.9804	0		Unknown	0		FALSE	TPK1	sp|P06244|KAPA_YEAST	cAMP-dependent protein kinase type 1
20180918_Lumos_RSLC6_Reiter_Ammerer_MFPL_onbead_Tpk1_1_2.37974.37974.3	LMLSIVTHPFIIR	LM[147]LSIVTHPFIIR	3	5471.37	519.306	519.305	-0.0016	0.0007	1554.89	1554.9	1.745e-08	45.294	36.736	1	0	2M(15.9949)	Unknown	0		TRUE	TPK1	sp|P06244|KAPA_YEAST	cAMP-dependent protein kinase type 1
20180918_Lumos_RSLC6_Reiter_Ammerer_MFPL_onbead_Tpk1_1_2.38075.38075.2	FPPFFNEDVK		2	5484.03	620.306	620.305	-0.0019	0.0004	1238.6	1238.6	2.218e-08	25.905	11.473	1	0		Unknown	0		TRUE	TPK1	sp|P06244|KAPA_YEAST	cAMP-dependent protein kinase type 1
20180918_Lumos_RSLC6_Reiter_Ammerer_MFPL_onbead_Tpk1_1_2.38160.38160.2	FPPFFNEDVK		2	5494.93	620.306	498.247	-244.119	-244.116	994.478	1238.6	0.04287	18.062	14.302	0.8712	0		Unknown	0		TRUE	TPK1	sp|P06244|KAPA_YEAST	cAMP-dependent protein kinase type 1
20180918_Lumos_RSLC6_Reiter_Ammerer_MFPL_onbead_Tpk1_1_2.38234.38234.2	FPPFFNEDVK		2	5504.25	620.306	498.287	-244.038	-244.036	994.559	1238.6	0.01295	18.157	13.971	0.9447	0		Unknown	0		TRUE	TPK1	sp|P06244|KAPA_YEAST	cAMP-dependent protein kinase type 1
20180918_Lumos_RSLC6_Reiter_Ammerer_MFPL_onbead_Tpk1_1_2.38340.38340.2	FPPFFNEDVK		2	5517.25	620.306	620.305	-0.0017	0.0006	1238.6	1238.6	1.41e-07	24.232	11.377	1	0		Unknown	0		TRUE	TPK1	sp|P06244|KAPA_YEAST	cAMP-dependent protein kinase type 1
20180918_Lumos_RSLC6_Reiter_Ammerer_MFPL_onbead_Tpk1_1_2.38401.38401.3	FPPFFNEDVK		3	5525.23	413.873	497.918	252.134	252.136	1490.73	1238.6	0.01091	21.409	16.149	0.9018	0		Unknown	0		FALSE	TPK1	sp|P06244|KAPA_YEAST	cAMP-dependent protein kinase type 1
20180918_Lumos_RSLC6_Reiter_Ammerer_MFPL_onbead_Tpk1_1_2.38470.38470.2	DLKPENILLDK		2	5533.4	649.372	670.873	43.0034	43.0057	1339.73	1296.73	0.0008149	23.687	18.312	0.9992	0		43.0058:Ala->Asn (Ala->Asn substitution), 43.0058:Carbamyl (Carbamylation)	0		FALSE	TPK3	sp|P05986|KAPC_YEAST	cAMP-dependent protein kinase type 3	sp|P06244|KAPA_YEAST, sp|P34244|HSL1_YEAST, sp|P38147|CHK1_YEAST, sp|Q03407|PKH1_YEAST
20180918_Lumos_RSLC6_Reiter_Ammerer_MFPL_onbead_Tpk1_1_2.38471.38471.2	ITDFGFAK		2	5533.67	449.737	450.263	1.0511	1.0534	898.511	897.46	1.896	16.95	16.498	0.962	0		Unknown	0		FALSE	TPK3	sp|P05986|KAPC_YEAST	cAMP-dependent protein kinase type 3	sp|P06244|KAPA_YEAST, sp|P06245|KAPB_YEAST
20180918_Lumos_RSLC6_Reiter_Ammerer_MFPL_onbead_Tpk1_1_2.38590.38590.3	LMLSIVTHPFIIR		3	5548.21	513.974	497.635	-49.0177	-49.0154	1489.88	1538.9	1.05e-05	31.631	30.058	0.9889	0		-49.0204:Tyr->Asn (Tyr->Asn substitution), -49.0204:Trp->His (Trp->His substitution)	0		TRUE	TPK1	sp|P06244|KAPA_YEAST	cAMP-dependent protein kinase type 1
20180918_Lumos_RSLC6_Reiter_Ammerer_MFPL_onbead_Tpk1_1_2.38616.38616.2	FPPFFNEDVK		2	5551.41	620.306	620.305	-0.0016	0.0007	1238.6	1238.6	1.351e-07	24.211	11.345	1	0		Unknown	0		TRUE	TPK1	sp|P06244|KAPA_YEAST	cAMP-dependent protein kinase type 1
20180918_Lumos_RSLC6_Reiter_Ammerer_MFPL_onbead_Tpk1_1_2.38675.38675.3	FPPFFNEDVK		3	5558.44	413.873	546.989	399.348	399.351	1637.95	1238.6	0.0001859	27.022	22.435	0.9995	0		Unknown	0		FALSE	TPK1	sp|P06244|KAPA_YEAST	cAMP-dependent protein kinase type 1
20180918_Lumos_RSLC6_Reiter_Ammerer_MFPL_onbead_Tpk1_1_2.38727.38727.2	FPPFFNEDVK		2	5564.94	620.306	498.247	-244.117	-244.115	994.48	1238.6	0.03773	18.084	14.716	0.8821	0		Unknown	0		TRUE	TPK1	sp|P06244|KAPA_YEAST	cAMP-dependent protein kinase type 1
20180918_Lumos_RSLC6_Reiter_Ammerer_MFPL_onbead_Tpk1_1_2.38870.38870.2	FPPFFNEDVK		2	5582.35	620.306	620.305	-0.0016	0.0007	1238.6	1238.6	1.727e-07	24.245	11.44	1	0		Unknown	0		TRUE	TPK1	sp|P06244|KAPA_YEAST	cAMP-dependent protein kinase type 1
20180918_Lumos_RSLC6_Reiter_Ammerer_MFPL_onbead_Tpk1_1_2.38905.38905.2	FPPFFNEDVK		2	5586.43	620.306	547.729	-145.153	-145.151	1093.44	1238.6	0.04516	16.642	13.656	0.8802	0		Unknown	0		TRUE	TPK1	sp|P06244|KAPA_YEAST	cAMP-dependent protein kinase type 1
20180918_Lumos_RSLC6_Reiter_Ammerer_MFPL_onbead_Tpk1_1_2.39002.39002.3	LMLSIVTHPFIIR	LM[147]LSIVTHPFIIR	3	5598.41	519.306	519.639	0.9996	1.0019	1555.9	1554.9	8.595e-08	33.432	27.803	1	0	2M(15.9949)	0.9970:Label:15N(1) (15N(1))	0		TRUE	TPK1	sp|P06244|KAPA_YEAST	cAMP-dependent protein kinase type 1
20180918_Lumos_RSLC6_Reiter_Ammerer_MFPL_onbead_Tpk1_1_2.39142.39142.3	FPPFFNEDVK		3	5615.63	413.873	546.927	399.163	399.165	1637.76	1238.6	0.0009741	24.948	18.532	0.9952	0		Unknown	0		FALSE	TPK1	sp|P06244|KAPA_YEAST	cAMP-dependent protein kinase type 1
20180918_Lumos_RSLC6_Reiter_Ammerer_MFPL_onbead_Tpk1_1_2.39148.39148.2	FPPFFNEDVK		2	5616.43	620.306	620.305	-0.002	0.0003	1238.6	1238.6	1.699e-07	24.296	11.477	1	0		Unknown	0		TRUE	TPK1	sp|P06244|KAPA_YEAST	cAMP-dependent protein kinase type 1
20180918_Lumos_RSLC6_Reiter_Ammerer_MFPL_onbead_Tpk1_1_2.39191.39191.3	FPPFFNEDVK		3	5621.74	413.873	498.277	253.214	253.216	1491.81	1238.6	0.2602	19.468	17.952	0.384	0		Unknown	0		FALSE	TPK1	sp|P06244|KAPA_YEAST	cAMP-dependent protein kinase type 1
20180918_Lumos_RSLC6_Reiter_Ammerer_MFPL_onbead_Tpk1_1_2.39406.39406.2	FPPFFNEDVK		2	5647.88	620.306	620.305	-0.0017	0.0006	1238.6	1238.6	2.875e-07	24.303	15.83	1	0		Unknown	0		TRUE	TPK1	sp|P06244|KAPA_YEAST	cAMP-dependent protein kinase type 1
20180918_Lumos_RSLC6_Reiter_Ammerer_MFPL_onbead_Tpk1_1_2.39582.39582.2	ITDFGFAK		2	5670.78	449.737	450.254	1.0343	1.0366	898.494	897.46	0.01559	15.083	11.367	0.9996	0		Unknown	0		FALSE	TPK3	sp|P05986|KAPC_YEAST	cAMP-dependent protein kinase type 3	sp|P06244|KAPA_YEAST, sp|P06245|KAPB_YEAST
20180918_Lumos_RSLC6_Reiter_Ammerer_MFPL_onbead_Tpk1_1_2.39635.39635.2	ITDFGFAK		2	5677.4	449.737	449.736	-0.0016	0.0007	897.458	897.46	0.001681	16.359	12.653	0.9999	0		Unknown	0		FALSE	TPK3	sp|P05986|KAPC_YEAST	cAMP-dependent protein kinase type 3	sp|P06244|KAPA_YEAST, sp|P06245|KAPB_YEAST
20180918_Lumos_RSLC6_Reiter_Ammerer_MFPL_onbead_Tpk1_1_2.39661.39661.2	FPPFFNEDVK		2	5681.05	620.306	620.305	-0.0017	0.0006	1238.6	1238.6	1.195e-07	24.175	11.315	1	0		Unknown	0		TRUE	TPK1	sp|P06244|KAPA_YEAST	cAMP-dependent protein kinase type 1
20180918_Lumos_RSLC6_Reiter_Ammerer_MFPL_onbead_Tpk1_1_2.39787.39787.2	FPPFFNEDVK		2	5696.61	620.306	547.045	-146.521	-146.519	1092.08	1238.6	0.008771	16.613	12.2	0.8746	0		Unknown	0		TRUE	TPK1	sp|P06244|KAPA_YEAST	cAMP-dependent protein kinase type 1
20180918_Lumos_RSLC6_Reiter_Ammerer_MFPL_onbead_Tpk1_1_2.39912.39912.2	ITDFGFAK		2	5711.97	449.737	450.254	1.0334	1.0357	898.493	897.46	0.009562	15.324	11.672	0.9997	0		Unknown	0		FALSE	TPK3	sp|P05986|KAPC_YEAST	cAMP-dependent protein kinase type 3	sp|P06244|KAPA_YEAST, sp|P06245|KAPB_YEAST
20180918_Lumos_RSLC6_Reiter_Ammerer_MFPL_onbead_Tpk1_1_2.39933.39933.2	FPPFFNEDVK		2	5714.45	620.306	620.305	-0.0011	0.0012	1238.6	1238.6	1.319e-07	24.253	11.43	1	0		Unknown	0		TRUE	TPK1	sp|P06244|KAPA_YEAST	cAMP-dependent protein kinase type 1
20180918_Lumos_RSLC6_Reiter_Ammerer_MFPL_onbead_Tpk1_1_3.43730.43730.3	YVPDVTYTLCGTPDYIAPEVVSTKPYNK		3	6129.01	1045.19	1174.2	387.037	387.039	3519.57	3132.54	1.935e-08	33.443	33.443	1	0		Unknown	0		FALSE	TPK3	sp|P05986|KAPC_YEAST	cAMP-dependent protein kinase type 3	sp|P06244|KAPA_YEAST
20180918_Lumos_RSLC6_Reiter_Ammerer_MFPL_onbead_Tpk1_1_2.40208.40208.2	ITDFGFAK		2	5748.41	449.737	449.736	-0.0016	0.0007	897.458	897.46	0.09836	15.119	12.262	0.9977	0		Unknown	0		FALSE	TPK3	sp|P05986|KAPC_YEAST	cAMP-dependent protein kinase type 3	sp|P06245|KAPB_YEAST, sp|P06244|KAPA_YEAST
20180918_Lumos_RSLC6_Reiter_Ammerer_MFPL_onbead_Tpk1_1_2.40213.40213.2	FPPFFNEDVK		2	5749.09	620.306	620.305	-0.001	0.0013	1238.6	1238.6	1.289e-07	24.3	11.489	1	0		Unknown	0		TRUE	TPK1	sp|P06244|KAPA_YEAST	cAMP-dependent protein kinase type 1
20180918_Lumos_RSLC6_Reiter_Ammerer_MFPL_onbead_Tpk1_1_2.40249.40249.2	ITDFGFAK		2	5753.25	449.737	450.24	1.0055	1.0078	898.465	897.46	0.06025	17.423	14.372	0.9988	0		Unknown	0		FALSE	TPK3	sp|P05986|KAPC_YEAST	cAMP-dependent protein kinase type 3	sp|P06244|KAPA_YEAST, sp|P06245|KAPB_YEAST
20180918_Lumos_RSLC6_Reiter_Ammerer_MFPL_onbead_Tpk1_1_2.40324.40324.3	VTSGKYSLQDFQILR	VTSGKY[243]S[167]LQDFQILR	3	5762.08	638.964	489.243	-449.162	-449.16	1464.71	1913.87	0.001248	24.547	22.142	0.91	0	6Y(79.9663), 7S(79.9663)	Unknown	0		FALSE	TPK1	sp|P06244|KAPA_YEAST	cAMP-dependent protein kinase type 1
20180918_Lumos_RSLC6_Reiter_Ammerer_MFPL_onbead_Tpk1_1_2.40466.40466.2	FPPFFNEDVK		2	5780.26	620.306	620.305	-0.0019	0.0004	1238.6	1238.6	2.321e-07	24.298	11.508	1	0		Unknown	0		TRUE	TPK1	sp|P06244|KAPA_YEAST	cAMP-dependent protein kinase type 1
20180918_Lumos_RSLC6_Reiter_Ammerer_MFPL_onbead_Tpk1_1_2.40473.40473.4	LGNLQNGTEDVKNHPWFK		4	5781.21	525.018	565.543	162.1	162.102	2258.14	2096.04	5.505e-10	38.88	19.065	1	0		Unknown	0		TRUE	TPK1	sp|P06244|KAPA_YEAST	cAMP-dependent protein kinase type 1
20180918_Lumos_RSLC6_Reiter_Ammerer_MFPL_onbead_Tpk1_1_2.40503.40503.3	LGNLQNGTEDVKNHPWFK		3	5785.34	699.689	754.056	163.101	163.103	2259.14	2096.04	0.0001051	24.862	15.166	0.9999	0		Unknown	0		TRUE	TPK1	sp|P06244|KAPA_YEAST	cAMP-dependent protein kinase type 1
20180918_Lumos_RSLC6_Reiter_Ammerer_MFPL_onbead_Tpk1_1_3.44371.44371.3	YVPDVTYTLCGTPDYIAPEVVSTKPYNK		3	6210.84	1045.19	1174.2	387.037	387.039	3519.57	3132.54	2.211e-07	33.901	33.901	1	0		Unknown	0		FALSE	TPK3	sp|P05986|KAPC_YEAST	cAMP-dependent protein kinase type 3	sp|P06244|KAPA_YEAST
20180918_Lumos_RSLC6_Reiter_Ammerer_MFPL_onbead_Tpk1_2_1.40204.40204.3	YVPDVTYTLCGTPDYIAPEVVSTKPYNK		3	6021.7	1045.19	1174.2	387.037	387.039	3519.57	3132.54	7.07e-09	36.113	36.113	1	0		Unknown	0		FALSE	TPK3	sp|P05986|KAPC_YEAST	cAMP-dependent protein kinase type 3	sp|P06244|KAPA_YEAST
20180918_Lumos_RSLC6_Reiter_Ammerer_MFPL_onbead_Tpk1_1_2.40578.40578.3	LGNLQNGTEDVKNHPWFK		3	5795.57	699.689	754.011	162.969	162.971	2259.01	2096.04	0.0001929	24.116	23.442	0.9998	0		Unknown	0		TRUE	TPK1	sp|P06244|KAPA_YEAST	cAMP-dependent protein kinase type 1
20180918_Lumos_RSLC6_Reiter_Ammerer_MFPL_onbead_Tpk1_2_3.41018.41018.3	YVPDVTYTLCGTPDYIAPEVVSTKPYNK		3	6070.52	1045.19	1174.2	387.037	387.039	3519.57	3132.54	5.984e-10	39.857	39.857	1	0		Unknown	0		FALSE	TPK3	sp|P05986|KAPC_YEAST	cAMP-dependent protein kinase type 3	sp|P06244|KAPA_YEAST
20180918_Lumos_RSLC6_Reiter_Ammerer_MFPL_onbead_Tpk1_1_2.40693.40693.3	LMLSIVTHPFIIR		3	5810.07	513.974	513.973	-0.002	0.0003	1538.9	1538.9	2.022e-07	45.367	36.845	1	0		Unknown	0		TRUE	TPK1	sp|P06244|KAPA_YEAST	cAMP-dependent protein kinase type 1
20180918_Lumos_RSLC6_Reiter_Ammerer_MFPL_onbead_Tpk1_2_3.41233.41233.3	YVPDVTYTLCGTPDYIAPEVVSTKPYNK		3	6101.69	1045.19	1174.2	387.037	387.039	3519.57	3132.54	3.3e-09	37.181	37.181	1	0		Unknown	0		FALSE	TPK3	sp|P05986|KAPC_YEAST	cAMP-dependent protein kinase type 3	sp|P06244|KAPA_YEAST
20180918_Lumos_RSLC6_Reiter_Ammerer_MFPL_onbead_Tpk1_1_2.40716.40716.2	LMLSIVTHPFIIR		2	5812.84	770.458	770.958	1.0013	1.0036	1539.9	1538.9	3.74e-07	32.444	21.435	1	0		0.9970:Label:15N(1) (15N(1))	0		TRUE	TPK1	sp|P06244|KAPA_YEAST	cAMP-dependent protein kinase type 1
20180918_Lumos_RSLC6_Reiter_Ammerer_MFPL_onbead_Tpk1_1_2.40718.40718.2	FPPFFNEDVK		2	5813.01	620.306	620.305	-0.0012	0.0011	1238.6	1238.6	1.647e-07	25.991	11.547	1	0		Unknown	0		TRUE	TPK1	sp|P06244|KAPA_YEAST	cAMP-dependent protein kinase type 1
20180918_Lumos_RSLC6_Reiter_Ammerer_MFPL_onbead_Tpk1_1_1.38629.38629.3	YVPDVTYTLCGTPDYIAPEVVSTKPYNK		3	6059.61	1045.19	1174.2	387.037	387.039	3519.57	3132.54	8.457e-11	41.808	41.808	1	0		Unknown	0		FALSE	TPK3	sp|P05986|KAPC_YEAST	cAMP-dependent protein kinase type 3	sp|P06244|KAPA_YEAST
20180918_Lumos_RSLC6_Reiter_Ammerer_MFPL_onbead_Tpk1_1_2.40771.40771.2	ITDFGFAK		2	5819.52	449.737	449.31	-0.8544	-0.8521	896.605	897.46	2.921	15.508	14.439	0.3878	0		Unknown	0		FALSE	TPK3	sp|P05986|KAPC_YEAST	cAMP-dependent protein kinase type 3	sp|P06244|KAPA_YEAST, sp|P06245|KAPB_YEAST
20180918_Lumos_RSLC6_Reiter_Ammerer_MFPL_onbead_Tpk1_1_2.40797.40797.3	FPPFFNEDVKDLLSR		3	5823.11	608.649	559.625	-147.071	-147.068	1675.85	1822.93	8.067e-13	49.629	19.66	1	0		Unknown	0		TRUE	TPK1	sp|P06244|KAPA_YEAST	cAMP-dependent protein kinase type 1
20180918_Lumos_RSLC6_Reiter_Ammerer_MFPL_onbead_Tpk1_1_2.40887.40887.3	YPEEDINYGVQGEDPYADLFR		3	5834.32	830.708	874.073	130.096	130.099	2619.2	2489.1	4.562e-06	31.137	30.3	0.9982	0		Unknown	0		TRUE	TPK1	sp|P06244|KAPA_YEAST	cAMP-dependent protein kinase type 1
20180918_Lumos_RSLC6_Reiter_Ammerer_MFPL_onbead_Tpk1_1_2.40950.40950.3	LMLSIVTHPFIIR		3	5842.29	513.974	513.973	-0.0021	0.0002	1538.9	1538.9	6.647e-08	45.483	36.913	1	0		Unknown	0		TRUE	TPK1	sp|P06244|KAPA_YEAST	cAMP-dependent protein kinase type 1
20180918_Lumos_RSLC6_Reiter_Ammerer_MFPL_onbead_Tpk1_3_3.40982.40982.4	YVPDVTYTLCGTPDYIAPEVVSTKPYNK		4	6042.32	784.141	880.9	387.037	387.039	3519.57	3132.54	1.013e-11	48.493	48.493	1	0		Unknown	0		FALSE	TPK3	sp|P05986|KAPC_YEAST	cAMP-dependent protein kinase type 3	sp|P06244|KAPA_YEAST
20180918_Lumos_RSLC6_Reiter_Ammerer_MFPL_onbead_Tpk1_1_2.41064.41064.3	YPEEDINYGVQGEDPYADLFR		3	5855.84	830.708	873.74	129.097	129.099	2618.2	2489.1	6.709e-07	33.77	33.027	0.9999	0		Unknown	0		TRUE	TPK1	sp|P06244|KAPA_YEAST	cAMP-dependent protein kinase type 1
20180918_Lumos_RSLC6_Reiter_Ammerer_MFPL_onbead_Tpk1_1_2.41078.41078.3	YPEEDINYGVQGEDPYADLFR		3	5857.78	830.708	873.741	129.099	129.101	2618.2	2489.1	5.366e-07	33.677	33.02	1	0		Unknown	0		TRUE	TPK1	sp|P06244|KAPA_YEAST	cAMP-dependent protein kinase type 1
20180918_Lumos_RSLC6_Reiter_Ammerer_MFPL_onbead_Tpk1_3_2.41702.41702.4	YVPDVTYTLCGTPDYIAPEVVSTKPYNK		4	6052.63	784.141	880.9	387.037	387.039	3519.57	3132.54	3.76e-11	48.306	48.306	1	0		Unknown	0		FALSE	TPK3	sp|P05986|KAPC_YEAST	cAMP-dependent protein kinase type 3	sp|P06244|KAPA_YEAST
20180918_Lumos_RSLC6_Reiter_Ammerer_MFPL_onbead_Tpk1_1_2.41212.41212.3	LMLSIVTHPFIIR		3	5874.37	513.974	513.974	-0.0014	0.0009	1538.9	1538.9	9.971e-08	37.951	31.4	1	0		Unknown	0		TRUE	TPK1	sp|P06244|KAPA_YEAST	cAMP-dependent protein kinase type 1
20180918_Lumos_RSLC6_Reiter_Ammerer_MFPL_onbead_Tpk1_1_2.41214.41214.2	FPPFFNEDVK		2	5874.65	620.306	648.816	57.0196	57.0219	1295.62	1238.6	0.04717	15.527	12.09	0.9772	0		57.0215:Gly (Addition of Glycine), 57.0215:Carbamidomethyl (Iodoacetamide derivative), 57.0215:Ala->Gln (Ala->Gln substitution), 57.0215:Gly->Asn (Gly->Asn substitution)	0		TRUE	TPK1	sp|P06244|KAPA_YEAST	cAMP-dependent protein kinase type 1
20180918_Lumos_RSLC6_Reiter_Ammerer_MFPL_onbead_Tpk1_1_2.41248.41248.2	FPPFFNEDVK		2	5879.21	620.306	620.305	-0.0012	0.0011	1238.6	1238.6	7.035e-08	26.178	11.867	1	0		Unknown	0		TRUE	TPK1	sp|P06244|KAPA_YEAST	cAMP-dependent protein kinase type 1
20180918_Lumos_RSLC6_Reiter_Ammerer_MFPL_onbead_Tpk1_3_3.40977.40977.3	YVPDVTYTLCGTPDYIAPEVVSTKPYNK		3	6041.55	1045.19	1174.2	387.037	387.039	3519.57	3132.54	1.031e-09	38.92	38.92	1	0		Unknown	0		FALSE	TPK3	sp|P05986|KAPC_YEAST	cAMP-dependent protein kinase type 3	sp|P06244|KAPA_YEAST
20180918_Lumos_RSLC6_Reiter_Ammerer_MFPL_onbead_Tpk1_4_3.41718.41718.4	YVPDVTYTLCGTPDYIAPEVVSTKPYNK		4	6058.28	784.141	880.9	387.037	387.039	3519.57	3132.54	3.553e-10	45.409	45.409	1	0		Unknown	0		FALSE	TPK3	sp|P05986|KAPC_YEAST	cAMP-dependent protein kinase type 3	sp|P06244|KAPA_YEAST
20180918_Lumos_RSLC6_Reiter_Ammerer_MFPL_onbead_Tpk1_1_2.41532.41532.2	FPPFFNEDVK		2	5913.83	620.306	648.816	57.0201	57.0224	1295.62	1238.6	2.997	15.694	14.502	0.4513	0		57.0215:Gly (Addition of Glycine), 57.0215:Carbamidomethyl (Iodoacetamide derivative), 57.0215:Ala->Gln (Ala->Gln substitution), 57.0215:Gly->Asn (Gly->Asn substitution)	0		TRUE	TPK1	sp|P06244|KAPA_YEAST	cAMP-dependent protein kinase type 1
20180918_Lumos_RSLC6_Reiter_Ammerer_MFPL_onbead_Tpk1_1_2.41645.41645.2	FPPFFNEDVK		2	5928.22	620.306	620.306	-0.0006	0.0017	1238.6	1238.6	4.592e-06	23.267	12.974	1	0		Unknown	0		TRUE	TPK1	sp|P06244|KAPA_YEAST	cAMP-dependent protein kinase type 1
20180918_Lumos_RSLC6_Reiter_Ammerer_MFPL_onbead_Tpk1_2_1.40725.40725.3	YVPDVTYTLCGTPDYIAPEVVSTKPYNK		3	6088.71	1045.19	1174.2	387.037	387.039	3519.57	3132.54	8.096e-09	36.189	36.189	1	0		Unknown	0		FALSE	TPK3	sp|P05986|KAPC_YEAST	cAMP-dependent protein kinase type 3	sp|P06244|KAPA_YEAST
20180918_Lumos_RSLC6_Reiter_Ammerer_MFPL_onbead_Tpk1_1_2.41754.41754.2	VTSGKYSLQDFQILR		2	5940.74	877.976	899.478	43.0051	43.0074	1796.94	1753.94	2.654e-07	34.896	28.495	1	0		43.0058:Carbamyl (Carbamylation), 43.0170:Xle->Arg (Leu/Ile->Arg substitution), 43.0058:Ala->Asn (Ala->Asn substitution)	0		TRUE	TPK1	sp|P06244|KAPA_YEAST	cAMP-dependent protein kinase type 1
20180918_Lumos_RSLC6_Reiter_Ammerer_MFPL_onbead_Tpk1_1_2.41984.41984.2	YSLQDFQILR		2	5970	641.843	641.842	-0.0026	-0.0003	1281.67	1281.67	0.01351	25.496	20.57	0.9995	0		Unknown	0		TRUE	TPK1	sp|P06244|KAPA_YEAST	cAMP-dependent protein kinase type 1
20180918_Lumos_RSLC6_Reiter_Ammerer_MFPL_onbead_Tpk1_1_2.42029.42029.3	YSLSDFQILR	YSLS[167]DFQILR	3	5975.27	441.211	440.88	-0.9939	-0.9916	1319.62	1320.61	0.01179	18.085	14.495	0.9843	0	4S(79.9663)	-0.9840:Amidated (Amidation), -0.9840:Asp->Asn (Asp->Asn substitution), -0.9840:Glu->Gln (Glu->Gln substitution)	0		TRUE	TPK3	sp|P05986|KAPC_YEAST	cAMP-dependent protein kinase type 3
20180918_Lumos_RSLC6_Reiter_Ammerer_MFPL_onbead_Tpk1_1_2.42210.42210.2	YSLQDFQILR		2	6000.61	641.843	641.842	-0.0027	-0.0004	1281.67	1281.67	3.07e-05	25.495	20.387	1	0		Unknown	0		TRUE	TPK1	sp|P06244|KAPA_YEAST	cAMP-dependent protein kinase type 1
20180918_Lumos_RSLC6_Reiter_Ammerer_MFPL_onbead_Tpk1_1_2.42247.42247.3	YSLSDFQILR	YSLS[167]DFQILR	3	6006.16	441.211	440.879	-0.9949	-0.9926	1319.62	1320.61	0.0122	18.077	14.424	0.9836	0	4S(79.9663)	-0.9840:Asp->Asn (Asp->Asn substitution), -0.9840:Glu->Gln (Glu->Gln substitution), -0.9840:Amidated (Amidation)	0		TRUE	TPK3	sp|P05986|KAPC_YEAST	cAMP-dependent protein kinase type 3
20180918_Lumos_RSLC6_Reiter_Ammerer_MFPL_onbead_Tpk1_1_2.42471.42471.2	YSLQDFQILR		2	6034.85	641.843	641.842	-0.0017	0.0006	1281.67	1281.67	0.001115	25.488	20.407	0.9999	0		Unknown	0		TRUE	TPK1	sp|P06244|KAPA_YEAST	cAMP-dependent protein kinase type 1
20180918_Lumos_RSLC6_Reiter_Ammerer_MFPL_onbead_Tpk1_1_1.38412.38412.4	YVPDVTYTLCGTPDYIAPEVVSTKPYNK		4	6027.33	784.141	880.9	387.036	387.038	3519.57	3132.54	1.004e-13	51.433	51.433	1	0		Unknown	0		FALSE	TPK3	sp|P05986|KAPC_YEAST	cAMP-dependent protein kinase type 3	sp|P06244|KAPA_YEAST
20180918_Lumos_RSLC6_Reiter_Ammerer_MFPL_onbead_Tpk1_2_2.39388.39388.4	YVPDVTYTLCGTPDYIAPEVVSTKPYNK		4	6084	784.141	880.9	387.036	387.038	3519.57	3132.54	3.034e-12	48.41	48.41	1	0		Unknown	0		FALSE	TPK3	sp|P05986|KAPC_YEAST	cAMP-dependent protein kinase type 3	sp|P06244|KAPA_YEAST
20180918_Lumos_RSLC6_Reiter_Ammerer_MFPL_onbead_Tpk1_2_1.40220.40220.4	YVPDVTYTLCGTPDYIAPEVVSTKPYNK		4	6023.84	784.141	880.9	387.036	387.038	3519.57	3132.54	2.62e-09	42.522	42.522	1	0		Unknown	0		FALSE	TPK3	sp|P05986|KAPC_YEAST	cAMP-dependent protein kinase type 3	sp|P06244|KAPA_YEAST
20180918_Lumos_RSLC6_Reiter_Ammerer_MFPL_onbead_Tpk1_2_2.39145.39145.4	YVPDVTYTLCGTPDYIAPEVVSTKPYNK		4	6052.95	784.141	880.9	387.036	387.038	3519.57	3132.54	1.668e-10	48.437	48.437	1	0		Unknown	0		FALSE	TPK3	sp|P05986|KAPC_YEAST	cAMP-dependent protein kinase type 3	sp|P06244|KAPA_YEAST
20180918_Lumos_RSLC6_Reiter_Ammerer_MFPL_onbead_Tpk1_3_1.39787.39787.3	YVPDVTYTLCGTPDYIAPEVVSTKPYNK		3	6070.88	1045.19	1174.2	387.036	387.038	3519.57	3132.54	2.316e-09	36.214	36.214	1	0		Unknown	0		FALSE	TPK3	sp|P05986|KAPC_YEAST	cAMP-dependent protein kinase type 3	sp|P06244|KAPA_YEAST
20180918_Lumos_RSLC6_Reiter_Ammerer_MFPL_onbead_Tpk1_3_1.39988.39988.3	YVPDVTYTLCGTPDYIAPEVVSTKPYNK		3	6098.94	1045.19	1174.2	387.036	387.038	3519.57	3132.54	1.252e-09	37.041	37.041	1	0		Unknown	0		FALSE	TPK3	sp|P05986|KAPC_YEAST	cAMP-dependent protein kinase type 3	sp|P06244|KAPA_YEAST
20180918_Lumos_RSLC6_Reiter_Ammerer_MFPL_onbead_Tpk1_2_2.39378.39378.3	YVPDVTYTLCGTPDYIAPEVVSTKPYNK		3	6082.73	1045.19	1174.2	387.036	387.038	3519.57	3132.54	6.171e-10	39.931	39.931	1	0		Unknown	0		FALSE	TPK3	sp|P05986|KAPC_YEAST	cAMP-dependent protein kinase type 3	sp|P06244|KAPA_YEAST
20180918_Lumos_RSLC6_Reiter_Ammerer_MFPL_onbead_Tpk1_3_1.39823.39823.4	YVPDVTYTLCGTPDYIAPEVVSTKPYNK		4	6075.75	784.141	880.9	387.035	387.038	3519.57	3132.54	6.499e-12	51.277	51.277	1	0		Unknown	0		FALSE	TPK3	sp|P05986|KAPC_YEAST	cAMP-dependent protein kinase type 3	sp|P06244|KAPA_YEAST
20180918_Lumos_RSLC6_Reiter_Ammerer_MFPL_onbead_Tpk1_1_2.42912.42912.2	FPPFFNEDVK		2	6087.75	620.306	620.305	-0.0009	0.0014	1238.6	1238.6	4.354e-05	23.351	14.193	0.9999	0		Unknown	0		TRUE	TPK1	sp|P06244|KAPA_YEAST	cAMP-dependent protein kinase type 1
20180918_Lumos_RSLC6_Reiter_Ammerer_MFPL_onbead_Tpk1_2_3.40777.40777.3	YVPDVTYTLCGTPDYIAPEVVSTKPYNK		3	6037.1	1045.19	1174.2	387.035	387.037	3519.57	3132.54	1.153e-10	39.876	39.876	1	0		Unknown	0		FALSE	TPK3	sp|P05986|KAPC_YEAST	cAMP-dependent protein kinase type 3	sp|P06244|KAPA_YEAST
20180918_Lumos_RSLC6_Reiter_Ammerer_MFPL_onbead_Tpk1_1_2.43047.43047.2	VTSGKYSLQDFQILR		2	6103.91	877.976	641.843	-472.266	-472.263	1281.67	1753.94	0.01429	22.632	22.117	0.5136	0		Unknown	0		TRUE	TPK1	sp|P06244|KAPA_YEAST	cAMP-dependent protein kinase type 1
20180918_Lumos_RSLC6_Reiter_Ammerer_MFPL_onbead_Tpk1_1_2.43057.43057.2	VTSGKYSLQDFQILR		2	6105.38	877.976	641.352	-473.246	-473.244	1280.69	1753.94	0.01115	22.875	21.732	0.689	0		Unknown	0		TRUE	TPK1	sp|P06244|KAPA_YEAST	cAMP-dependent protein kinase type 1
20180918_Lumos_RSLC6_Reiter_Ammerer_MFPL_onbead_Tpk1_3_1.39578.39578.4	YVPDVTYTLCGTPDYIAPEVVSTKPYNK		4	6042.85	784.141	880.9	387.035	387.037	3519.57	3132.54	1.846e-10	48.356	48.356	1	0		Unknown	0		FALSE	TPK3	sp|P05986|KAPC_YEAST	cAMP-dependent protein kinase type 3	sp|P06244|KAPA_YEAST
20180918_Lumos_RSLC6_Reiter_Ammerer_MFPL_onbead_Tpk1_1_1.39359.39359.4	YVPDVTYTLCGTPDYIAPEVVSTKPYNK		4	6172.78	784.141	880.9	387.035	387.037	3519.57	3132.54	8.944e-10	45.357	45.357	1	0		Unknown	0		FALSE	TPK3	sp|P05986|KAPC_YEAST	cAMP-dependent protein kinase type 3	sp|P06244|KAPA_YEAST
20180918_Lumos_RSLC6_Reiter_Ammerer_MFPL_onbead_Tpk1_4_3.41727.41727.3	YVPDVTYTLCGTPDYIAPEVVSTKPYNK		3	6059.71	1045.19	1174.2	387.034	387.036	3519.57	3132.54	1.486e-09	37.136	37.136	1	0		Unknown	0		FALSE	TPK3	sp|P05986|KAPC_YEAST	cAMP-dependent protein kinase type 3	sp|P06244|KAPA_YEAST
20180918_Lumos_RSLC6_Reiter_Ammerer_MFPL_onbead_Tpk1_1_2.43373.43373.2	VTSGKYSLQDFQILR		2	6147.14	877.976	641.843	-472.265	-472.263	1281.67	1753.94	0.01139	22.703	22.161	0.5525	0		Unknown	0		TRUE	TPK1	sp|P06244|KAPA_YEAST	cAMP-dependent protein kinase type 1
20180918_Lumos_RSLC6_Reiter_Ammerer_MFPL_onbead_Tpk1_2_1.40476.40476.4	YVPDVTYTLCGTPDYIAPEVVSTKPYNK		4	6055.61	784.141	880.9	387.034	387.036	3519.57	3132.54	3.472e-08	39.619	39.619	1	0		Unknown	0		FALSE	TPK3	sp|P05986|KAPC_YEAST	cAMP-dependent protein kinase type 3	sp|P06244|KAPA_YEAST
20180918_Lumos_RSLC6_Reiter_Ammerer_MFPL_onbead_Tpk1_3_2.42153.42153.3	YVPDVTYTLCGTPDYIAPEVVSTKPYNK		3	6112.78	1045.19	1174.2	387.033	387.035	3519.57	3132.54	1.206e-09	37.144	37.144	1	0		Unknown	0		FALSE	TPK3	sp|P05986|KAPC_YEAST	cAMP-dependent protein kinase type 3	sp|P06244|KAPA_YEAST
20180918_Lumos_RSLC6_Reiter_Ammerer_MFPL_onbead_Tpk1_1_2.43520.43520.2	FPPFFNEDVK		2	6165.05	620.306	620.305	-0.0011	0.0012	1238.6	1238.6	0.0007023	21.278	14.663	0.9999	0		Unknown	0		TRUE	TPK1	sp|P06244|KAPA_YEAST	cAMP-dependent protein kinase type 1
20180918_Lumos_RSLC6_Reiter_Ammerer_MFPL_onbead_Tpk1_4_2.40694.40694.4	YVPDVTYTLCGTPDYIAPEVVSTKPYNK		4	6076.99	784.141	880.899	387.032	387.035	3519.57	3132.54	4.085e-13	51.362	51.362	1	0		Unknown	0		FALSE	TPK3	sp|P05986|KAPC_YEAST	cAMP-dependent protein kinase type 3	sp|P06244|KAPA_YEAST
20180918_Lumos_RSLC6_Reiter_Ammerer_MFPL_onbead_Tpk1_1_2.43797.43797.3	YVPDVTYTLCGTPDYIAPEVVSTKPYNK		3	6199.63	1045.19	1174.2	387.032	387.034	3519.57	3132.54	3.618e-09	36.488	36.488	1	0		Unknown	0		FALSE	TPK3	sp|P05986|KAPC_YEAST	cAMP-dependent protein kinase type 3	sp|P06244|KAPA_YEAST
20180918_Lumos_RSLC6_Reiter_Ammerer_MFPL_onbead_Tpk1_1_3.44291.44291.4	YVPDVTYTLCGTPDYIAPEVVSTKPYNK		4	6201.02	784.141	880.899	387.03	387.032	3519.57	3132.54	1.284e-06	36.288	36.288	1	0		Unknown	0		FALSE	TPK3	sp|P05986|KAPC_YEAST	cAMP-dependent protein kinase type 3	sp|P06244|KAPA_YEAST
20180918_Lumos_RSLC6_Reiter_Ammerer_MFPL_onbead_Tpk1_1_3.44352.44352.3	YVPDVTYTLCGTPDYIAPEVVSTKPYNK		3	6208.68	1045.19	1174.2	387.03	387.032	3519.57	3132.54	2.13e-07	33.595	33.595	1	0		Unknown	0		FALSE	TPK3	sp|P05986|KAPC_YEAST	cAMP-dependent protein kinase type 3	sp|P06244|KAPA_YEAST
20180918_Lumos_RSLC6_Reiter_Ammerer_MFPL_onbead_Tpk1_2_2.40292.40292.4	YVPDVTYTLCGTPDYIAPEVVSTKPYNK		4	6208.54	784.141	880.652	386.042	386.044	3518.58	3132.54	0.01026	28.778	28.778	1	0		Unknown	0		FALSE	TPK3	sp|P05986|KAPC_YEAST	cAMP-dependent protein kinase type 3	sp|P06244|KAPA_YEAST
20180918_Lumos_RSLC6_Reiter_Ammerer_MFPL_onbead_Tpk1_4_3.41701.41701.3	YVPDVTYTLCGTPDYIAPEVVSTKPYNK		3	6055.61	1045.19	1173.87	386.042	386.044	3518.58	3132.54	9.505e-10	38.886	38.886	1	0		Unknown	0		FALSE	TPK3	sp|P05986|KAPC_YEAST	cAMP-dependent protein kinase type 3	sp|P06244|KAPA_YEAST
20180918_Lumos_RSLC6_Reiter_Ammerer_MFPL_onbead_Tpk1_4_1.39970.39970.3	YVPDVTYTLCGTPDYIAPEVVSTKPYNK		3	6221.59	1045.19	1173.87	386.041	386.043	3518.58	3132.54	2.889e-06	30.516	30.516	0.9973	0		Unknown	0		FALSE	TPK3	sp|P05986|KAPC_YEAST	cAMP-dependent protein kinase type 3	sp|P06244|KAPA_YEAST
20180918_Lumos_RSLC6_Reiter_Ammerer_MFPL_onbead_Tpk1_3_2.42864.42864.3	YVPDVTYTLCGTPDYIAPEVVSTKPYNK		3	6212.17	1045.19	1173.87	386.039	386.042	3518.58	3132.54	8.769e-09	33.725	33.725	1	0		Unknown	0		FALSE	TPK3	sp|P05986|KAPC_YEAST	cAMP-dependent protein kinase type 3	sp|P06244|KAPA_YEAST
20180918_Lumos_RSLC6_Reiter_Ammerer_MFPL_onbead_Tpk1_1_3.43158.43158.3	YVPDVTYTLCGTPDYIAPEVVSTKPYNK		3	6054.7	1045.19	1173.87	386.038	386.041	3518.57	3132.54	6.534e-09	36.937	36.937	1	0		Unknown	0		FALSE	TPK3	sp|P05986|KAPC_YEAST	cAMP-dependent protein kinase type 3	sp|P06244|KAPA_YEAST
20180918_Lumos_RSLC6_Reiter_Ammerer_MFPL_onbead_Tpk1_3_1.39982.39982.3	YVPDVTYTLCGTPDYIAPEVVSTKPYNK		3	6098.14	1045.19	1173.87	386.038	386.04	3518.57	3132.54	2.748e-09	38.793	38.793	1	0		Unknown	0		FALSE	TPK3	sp|P05986|KAPC_YEAST	cAMP-dependent protein kinase type 3	sp|P06244|KAPA_YEAST
20180918_Lumos_RSLC6_Reiter_Ammerer_MFPL_onbead_Tpk1_3_1.40483.40483.4	YVPDVTYTLCGTPDYIAPEVVSTKPYNK		4	6169.18	784.141	880.65	386.037	386.039	3518.57	3132.54	7.116e-08	39.115	39.115	1	0		Unknown	0		FALSE	TPK3	sp|P05986|KAPC_YEAST	cAMP-dependent protein kinase type 3	sp|P06244|KAPA_YEAST
20180918_Lumos_RSLC6_Reiter_Ammerer_MFPL_onbead_Tpk1_3_3.41209.41209.3	YVPDVTYTLCGTPDYIAPEVVSTKPYNK		3	6075.84	1045.19	1173.86	386.036	386.038	3518.57	3132.54	8.321e-10	39.773	39.773	1	0		Unknown	0		FALSE	TPK3	sp|P05986|KAPC_YEAST	cAMP-dependent protein kinase type 3	sp|P06244|KAPA_YEAST
20180918_Lumos_RSLC6_Reiter_Ammerer_MFPL_onbead_Tpk1_3_3.41484.41484.3	YVPDVTYTLCGTPDYIAPEVVSTKPYNK		3	6118.57	1045.19	1173.86	386.036	386.038	3518.57	3132.54	1.051e-09	36.097	36.097	1	0		Unknown	0		FALSE	TPK3	sp|P05986|KAPC_YEAST	cAMP-dependent protein kinase type 3	sp|P06244|KAPA_YEAST
20180918_Lumos_RSLC6_Reiter_Ammerer_MFPL_onbead_Tpk1_2_2.40272.40272.3	YVPDVTYTLCGTPDYIAPEVVSTKPYNK		3	6205.95	1045.19	1173.86	386.036	386.038	3518.57	3132.54	1.278e-08	36.182	36.182	1	0		Unknown	0		FALSE	TPK3	sp|P05986|KAPC_YEAST	cAMP-dependent protein kinase type 3	sp|P06244|KAPA_YEAST
20180918_Lumos_RSLC6_Reiter_Ammerer_MFPL_onbead_Tpk1_1_2.43867.43867.2	VTSGKYSLQDFQILR		2	6208.55	877.976	642.343	-471.264	-471.262	1282.67	1753.94	0.01331	22.455	22.146	0.8458	0		Unknown	0		TRUE	TPK1	sp|P06244|KAPA_YEAST	cAMP-dependent protein kinase type 1
20180918_Lumos_RSLC6_Reiter_Ammerer_MFPL_onbead_Tpk1_3_2.41955.41955.3	YVPDVTYTLCGTPDYIAPEVVSTKPYNK		3	6085.51	1045.19	1173.86	386.035	386.038	3518.57	3132.54	3.451e-10	39.768	39.768	1	0		Unknown	0		FALSE	TPK3	sp|P05986|KAPC_YEAST	cAMP-dependent protein kinase type 3	sp|P06244|KAPA_YEAST
20180918_Lumos_RSLC6_Reiter_Ammerer_MFPL_onbead_Tpk1_1_2.43885.43885.4	LGNLQNGTEDVKNHPWFK		4	6210.65	525.018	566.041	164.09	164.093	2260.13	2096.04	0.1286	19.665	17.317	0.6943	0		Unknown	0		TRUE	TPK1	sp|P06244|KAPA_YEAST	cAMP-dependent protein kinase type 1
20180918_Lumos_RSLC6_Reiter_Ammerer_MFPL_onbead_Tpk1_1_1.38848.38848.3	YVPDVTYTLCGTPDYIAPEVVSTKPYNK		3	6092.74	1045.19	1173.86	386.035	386.037	3518.57	3132.54	4.663e-11	42.716	42.716	1	0		Unknown	0		FALSE	TPK3	sp|P05986|KAPC_YEAST	cAMP-dependent protein kinase type 3	sp|P06244|KAPA_YEAST
20180918_Lumos_RSLC6_Reiter_Ammerer_MFPL_onbead_Tpk1_1_2.43916.43916.3	YPEEDINYGVQGEDPYADLFR		3	6214.61	830.708	912.081	244.119	244.122	2733.22	2489.1	2.485e-07	32.766	30.562	1	0		Unknown	0		TRUE	TPK1	sp|P06244|KAPA_YEAST	cAMP-dependent protein kinase type 1
20180918_Lumos_RSLC6_Reiter_Ammerer_MFPL_onbead_Tpk1_4_1.38604.38604.3	YVPDVTYTLCGTPDYIAPEVVSTKPYNK		3	6021.06	1045.19	1173.86	386.035	386.037	3518.57	3132.54	1.554e-11	42.667	42.667	1	0		Unknown	0		FALSE	TPK3	sp|P05986|KAPC_YEAST	cAMP-dependent protein kinase type 3	sp|P06244|KAPA_YEAST
20180918_Lumos_RSLC6_Reiter_Ammerer_MFPL_onbead_Tpk1_1_2.43935.43935.3	YPEEDINYGVQGEDPYADLFR		3	6217.03	830.708	911.747	243.118	243.121	2732.22	2489.1	1.472e-07	35.179	33.787	1	0		Unknown	0		TRUE	TPK1	sp|P06244|KAPA_YEAST	cAMP-dependent protein kinase type 1
20180918_Lumos_RSLC6_Reiter_Ammerer_MFPL_onbead_Tpk1_4_3.43017.43017.4	YVPDVTYTLCGTPDYIAPEVVSTKPYNK		4	6240.15	784.141	880.65	386.035	386.037	3518.57	3132.54	1.437e-08	40.669	39.746	1	0		Unknown	0		FALSE	TPK3	sp|P05986|KAPC_YEAST	cAMP-dependent protein kinase type 3	sp|P06244|KAPA_YEAST
20180918_Lumos_RSLC6_Reiter_Ammerer_MFPL_onbead_Tpk1_1_1.39193.39193.3	YVPDVTYTLCGTPDYIAPEVVSTKPYNK		3	6147.04	1045.19	1173.86	386.035	386.037	3518.57	3132.54	1.373e-08	30.662	30.662	1	0		Unknown	0		FALSE	TPK3	sp|P05986|KAPC_YEAST	cAMP-dependent protein kinase type 3	sp|P06244|KAPA_YEAST
20180918_Lumos_RSLC6_Reiter_Ammerer_MFPL_onbead_Tpk1_1_1.39670.39670.4	YVPDVTYTLCGTPDYIAPEVVSTKPYNK		4	6220.69	784.141	880.65	386.035	386.037	3518.57	3132.54	1.18e-10	45.479	45.479	1	0		Unknown	0		FALSE	TPK3	sp|P05986|KAPC_YEAST	cAMP-dependent protein kinase type 3	sp|P06244|KAPA_YEAST
20180918_Lumos_RSLC6_Reiter_Ammerer_MFPL_onbead_Tpk1_4_1.38619.38619.4	YVPDVTYTLCGTPDYIAPEVVSTKPYNK		4	6023.03	784.141	880.65	386.035	386.037	3518.57	3132.54	2.809e-12	51.383	51.383	1	0		Unknown	0		FALSE	TPK3	sp|P05986|KAPC_YEAST	cAMP-dependent protein kinase type 3	sp|P06244|KAPA_YEAST
20180918_Lumos_RSLC6_Reiter_Ammerer_MFPL_onbead_Tpk1_1_2.44111.44111.3	YPEEDINYGVQGEDPYADLFR	Y[243]PEEDINYGVQGEDPYADLFR	3	6238.27	857.363	1003.79	439.285	439.287	3008.35	2569.07	8.756e-08	33.285	30.629	1	0	1Y(79.9663)	Unknown	0		FALSE	TPK1	sp|P06244|KAPA_YEAST	cAMP-dependent protein kinase type 1
20180918_Lumos_RSLC6_Reiter_Ammerer_MFPL_onbead_Tpk1_1_2.44121.44121.3	YPEEDINYGVQGEDPYADLFR		3	6239.56	830.708	961.105	391.192	391.194	2880.29	2489.1	2.655e-09	41.289	35.851	1	0		Unknown	0		TRUE	TPK1	sp|P06244|KAPA_YEAST	cAMP-dependent protein kinase type 1
20180918_Lumos_RSLC6_Reiter_Ammerer_MFPL_onbead_Tpk1_1_2.44144.44144.2	YSLQDFQILR		2	6242.61	641.843	641.843	-0.0004	0.0019	1281.67	1281.67	0.01031	22.615	22.556	0.9995	0		Unknown	0		TRUE	TPK1	sp|P06244|KAPA_YEAST	cAMP-dependent protein kinase type 1
20180918_Lumos_RSLC6_Reiter_Ammerer_MFPL_onbead_Tpk1_1_1.38867.38867.4	YVPDVTYTLCGTPDYIAPEVVSTKPYNK		4	6095.82	784.141	880.65	386.035	386.037	3518.57	3132.54	2.849e-12	54.396	54.396	1	0		Unknown	0		FALSE	TPK3	sp|P05986|KAPC_YEAST	cAMP-dependent protein kinase type 3	sp|P06244|KAPA_YEAST
20180918_Lumos_RSLC6_Reiter_Ammerer_MFPL_onbead_Tpk1_1_2.44169.44169.2	FPPFFNEDVK		2	6245.7	620.306	620.305	-0.0011	0.0012	1238.6	1238.6	8.278e-07	24.619	12.223	1	0		Unknown	0		TRUE	TPK1	sp|P06244|KAPA_YEAST	cAMP-dependent protein kinase type 1
20180918_Lumos_RSLC6_Reiter_Ammerer_MFPL_onbead_Tpk1_1_2.44258.44258.3	YPEEDINYGVQGEDPYADLFR		3	6256.7	830.708	961.105	391.19	391.193	2880.29	2489.1	3.544e-07	34.256	33.152	1	0		Unknown	0		TRUE	TPK1	sp|P06244|KAPA_YEAST	cAMP-dependent protein kinase type 1
20180918_Lumos_RSLC6_Reiter_Ammerer_MFPL_onbead_Tpk1_3_1.39551.39551.3	YVPDVTYTLCGTPDYIAPEVVSTKPYNK		3	6039.01	1045.19	1173.86	386.035	386.037	3518.57	3132.54	2.085e-11	42.527	42.527	1	0		Unknown	0		FALSE	TPK3	sp|P05986|KAPC_YEAST	cAMP-dependent protein kinase type 3	sp|P06244|KAPA_YEAST
20180918_Lumos_RSLC6_Reiter_Ammerer_MFPL_onbead_Tpk1_1_2.44282.44282.4	NIETPYEPPIQQGQGDTSQFDKYPEEDINYGVQGEDPYADLFR		4	6259.69	1241.57	1281.34	159.104	159.107	5121.35	4962.24	1.69e-09	41.179	39.942	1	0		Unknown	0		TRUE	TPK1	sp|P06244|KAPA_YEAST	cAMP-dependent protein kinase type 1
20180918_Lumos_RSLC6_Reiter_Ammerer_MFPL_onbead_Tpk1_1_2.44294.44294.4	NIETPYEPPIQQGQGDTSQFDKYPEEDINYGVQGEDPYADLFR		4	6261.37	1241.57	1281.34	159.109	159.111	5121.35	4962.24	2.832e-09	39.929	39.929	1	0		Unknown	0		TRUE	TPK1	sp|P06244|KAPA_YEAST	cAMP-dependent protein kinase type 1
20180918_Lumos_RSLC6_Reiter_Ammerer_MFPL_onbead_Tpk1_1_2.44549.44549.3	YPEEDINYGVQGEDPYADLFR	Y[243]PEEDINY[243]GVQGEDPYADLFR	3	6293.97	884.019	1033.14	447.349	447.351	3096.38	2649.03	8.529e-06	33.138	19.873	0.9959	0	1Y(79.9663), 8Y(79.9663)	Unknown	0		FALSE	TPK1	sp|P06244|KAPA_YEAST	cAMP-dependent protein kinase type 1
20180918_Lumos_RSLC6_Reiter_Ammerer_MFPL_onbead_Tpk1_1_2.44556.44556.3	YPEEDINYGVQGEDPYADLFR	Y[243]PEEDINY[243]GVQGEDPYADLFR	3	6295.15	884.019	1032.8	446.351	446.353	3095.39	2649.03	7.142e-05	33.323	21.615	0.9989	0	1Y(79.9663), 8Y(79.9663)	Unknown	0		FALSE	TPK1	sp|P06244|KAPA_YEAST	cAMP-dependent protein kinase type 1
20180918_Lumos_RSLC6_Reiter_Ammerer_MFPL_onbead_Tpk1_1_2.44592.44592.2	VTSGKYSLQDFQILR		2	6299.46	877.976	641.843	-472.265	-472.262	1281.67	1753.94	0.01291	22.398	22.102	0.5313	0		Unknown	0		TRUE	TPK1	sp|P06244|KAPA_YEAST	cAMP-dependent protein kinase type 1
20180918_Lumos_RSLC6_Reiter_Ammerer_MFPL_onbead_Tpk1_1_2.44720.44720.2	YSLQDFQILR		2	6316.06	641.843	641.842	-0.0014	0.0009	1281.67	1281.67	3.098	22.053	21.673	0.9292	0		Unknown	0		TRUE	TPK1	sp|P06244|KAPA_YEAST	cAMP-dependent protein kinase type 1
20180918_Lumos_RSLC6_Reiter_Ammerer_MFPL_onbead_Tpk1_1_1.38898.38898.4	YVPDVTYTLCGTPDYIAPEVVSTKPYNK		4	6100.61	784.141	880.65	386.035	386.037	3518.57	3132.54	1.276e-10	51.348	51.348	1	0		Unknown	0		FALSE	TPK3	sp|P05986|KAPC_YEAST	cAMP-dependent protein kinase type 3	sp|P06244|KAPA_YEAST
20180918_Lumos_RSLC6_Reiter_Ammerer_MFPL_onbead_Tpk1_1_2.44913.44913.2	VTSGKYSLQDFQILR		2	6339.09	877.976	641.843	-472.265	-472.263	1281.67	1753.94	0.004563	23.305	22.126	0.6808	0		Unknown	0		TRUE	TPK1	sp|P06244|KAPA_YEAST	cAMP-dependent protein kinase type 1
20180918_Lumos_RSLC6_Reiter_Ammerer_MFPL_onbead_Tpk1_2_3.40789.40789.4	YVPDVTYTLCGTPDYIAPEVVSTKPYNK		4	6038.65	784.141	880.65	386.035	386.037	3518.57	3132.54	1.981e-13	54.448	54.448	1	0		Unknown	0		FALSE	TPK3	sp|P05986|KAPC_YEAST	cAMP-dependent protein kinase type 3	sp|P06244|KAPA_YEAST
20180918_Lumos_RSLC6_Reiter_Ammerer_MFPL_onbead_Tpk1_3_1.40962.40962.3	YVPDVTYTLCGTPDYIAPEVVSTKPYNK		3	6237.62	1045.19	1173.86	386.034	386.036	3518.57	3132.54	4.105e-10	39.733	39.733	1	0		Unknown	0		FALSE	TPK3	sp|P05986|KAPC_YEAST	cAMP-dependent protein kinase type 3	sp|P06244|KAPA_YEAST
20180918_Lumos_RSLC6_Reiter_Ammerer_MFPL_onbead_Tpk1_2_1.40455.40455.3	YVPDVTYTLCGTPDYIAPEVVSTKPYNK		3	6053.13	1045.19	1173.86	386.034	386.036	3518.57	3132.54	7.044e-10	39.845	39.845	1	0		Unknown	0		FALSE	TPK3	sp|P05986|KAPC_YEAST	cAMP-dependent protein kinase type 3	sp|P06244|KAPA_YEAST
20180918_Lumos_RSLC6_Reiter_Ammerer_MFPL_onbead_Tpk1_1_2.45096.45096.3	YPEEDINYGVQGEDPYADLFR	Y[243]PEEDINYGVQGEDPYADLFR	3	6361.66	857.363	1011.47	462.305	462.307	3031.37	2569.07	0.01255	24.514	22.861	0.8551	0	1Y(79.9663)	Unknown	0		FALSE	TPK1	sp|P06244|KAPA_YEAST	cAMP-dependent protein kinase type 1
20180918_Lumos_RSLC6_Reiter_Ammerer_MFPL_onbead_Tpk1_4_3.41965.41965.4	YVPDVTYTLCGTPDYIAPEVVSTKPYNK		4	6091.54	784.141	880.65	386.034	386.036	3518.57	3132.54	4.777e-12	51.356	51.356	1	0		Unknown	0		FALSE	TPK3	sp|P05986|KAPC_YEAST	cAMP-dependent protein kinase type 3	sp|P06244|KAPA_YEAST
20180918_Lumos_RSLC6_Reiter_Ammerer_MFPL_onbead_Tpk1_1_2.45130.45130.3	YPEEDINYGVQGEDPYADLFR	Y[243]PEEDINYGVQGEDPYADLFR	3	6365.98	857.363	1011.8	463.309	463.311	3032.38	2569.07	1.581e-06	30.282	28.045	0.9975	0	1Y(79.9663)	Unknown	0		FALSE	TPK1	sp|P06244|KAPA_YEAST	cAMP-dependent protein kinase type 1
20180918_Lumos_RSLC6_Reiter_Ammerer_MFPL_onbead_Tpk1_3_3.41208.41208.4	YVPDVTYTLCGTPDYIAPEVVSTKPYNK		4	6075.57	784.141	880.65	386.034	386.036	3518.57	3132.54	3.578e-11	48.472	48.472	1	0		Unknown	0		FALSE	TPK3	sp|P05986|KAPC_YEAST	cAMP-dependent protein kinase type 3	sp|P06244|KAPA_YEAST
20180918_Lumos_RSLC6_Reiter_Ammerer_MFPL_onbead_Tpk1_4_1.39041.39041.4	YVPDVTYTLCGTPDYIAPEVVSTKPYNK		4	6082.69	784.141	880.65	386.034	386.036	3518.57	3132.54	5.783e-10	45.273	45.273	1	0		Unknown	0		FALSE	TPK3	sp|P05986|KAPC_YEAST	cAMP-dependent protein kinase type 3	sp|P06244|KAPA_YEAST
20180918_Lumos_RSLC6_Reiter_Ammerer_MFPL_onbead_Tpk1_1_1.38628.38628.4	YVPDVTYTLCGTPDYIAPEVVSTKPYNK		4	6059.52	784.141	880.65	386.034	386.036	3518.57	3132.54	2.696e-13	51.362	51.362	1	0		Unknown	0		FALSE	TPK3	sp|P05986|KAPC_YEAST	cAMP-dependent protein kinase type 3	sp|P06244|KAPA_YEAST
20180918_Lumos_RSLC6_Reiter_Ammerer_MFPL_onbead_Tpk1_4_1.38860.38860.4	YVPDVTYTLCGTPDYIAPEVVSTKPYNK		4	6057.15	784.141	880.65	386.033	386.036	3518.57	3132.54	2.357e-12	48.45	48.45	1	0		Unknown	0		FALSE	TPK3	sp|P05986|KAPC_YEAST	cAMP-dependent protein kinase type 3	sp|P06244|KAPA_YEAST
20180918_Lumos_RSLC6_Reiter_Ammerer_MFPL_onbead_Tpk1_3_1.40091.40091.3	YVPDVTYTLCGTPDYIAPEVVSTKPYNK		3	6114.72	1045.19	1173.86	386.033	386.035	3518.57	3132.54	1.979e-07	30.826	30.826	1	0		Unknown	0		FALSE	TPK3	sp|P05986|KAPC_YEAST	cAMP-dependent protein kinase type 3	sp|P06244|KAPA_YEAST
20180918_Lumos_RSLC6_Reiter_Ammerer_MFPL_onbead_Tpk1_2_1.41244.41244.4	YVPDVTYTLCGTPDYIAPEVVSTKPYNK		4	6158.95	784.141	880.65	386.033	386.035	3518.57	3132.54	5.616e-08	37.386	36.387	1	0		Unknown	0		FALSE	TPK3	sp|P05986|KAPC_YEAST	cAMP-dependent protein kinase type 3	sp|P06244|KAPA_YEAST
20180918_Lumos_RSLC6_Reiter_Ammerer_MFPL_onbead_Tpk1_1_3.43835.43835.4	YVPDVTYTLCGTPDYIAPEVVSTKPYNK		4	6141.9	784.141	880.65	386.033	386.035	3518.57	3132.54	1.713e-07	33.869	33.869	1	0		Unknown	0		FALSE	TPK3	sp|P05986|KAPC_YEAST	cAMP-dependent protein kinase type 3	sp|P06244|KAPA_YEAST
20180918_Lumos_RSLC6_Reiter_Ammerer_MFPL_onbead_Tpk1_1_2.45638.45638.2	FPPFFNEDVK		2	6428.72	620.306	620.306	0.0002	0.0025	1238.6	1238.6	2.234e-05	22.247	13.374	1	0		Unknown	0		TRUE	TPK1	sp|P06244|KAPA_YEAST	cAMP-dependent protein kinase type 1
20180918_Lumos_RSLC6_Reiter_Ammerer_MFPL_onbead_Tpk1_1_2.45649.45649.2	FPPFFNEDVK		2	6430.09	620.306	620.806	0.9999	1.0022	1239.6	1238.6	0.01203	18.754	14.004	0.9997	0		0.9970:Label:15N(1) (15N(1))	0		TRUE	TPK1	sp|P06244|KAPA_YEAST	cAMP-dependent protein kinase type 1
20180918_Lumos_RSLC6_Reiter_Ammerer_MFPL_onbead_Tpk1_2_1.45915.45915.4	FYAAEVCLALEYLHSK		4	6830.23	464.987	541.504	306.069	306.071	2161.99	1855.92	0.00494	29.779	25.486	0.9993	0		Unknown	0		FALSE	TPK3	sp|P05986|KAPC_YEAST	cAMP-dependent protein kinase type 3	sp|P06244|KAPA_YEAST
20180918_Lumos_RSLC6_Reiter_Ammerer_MFPL_onbead_Tpk1_1_3.49210.49210.4	FYAAEVCLALEYLHSK		4	6848	464.987	541.504	306.069	306.071	2161.99	1855.92	5.426e-06	34.093	32.4	1	0		Unknown	0		FALSE	TPK3	sp|P05986|KAPC_YEAST	cAMP-dependent protein kinase type 3	sp|P06244|KAPA_YEAST
20180918_Lumos_RSLC6_Reiter_Ammerer_MFPL_onbead_Tpk1_1_2.45787.45787.2	YPEEDINYGVQGEDPYADLFR		2	6447.4	1245.56	1165.03	-161.061	-161.059	2328.04	2489.1	3.944e-08	32.525	30.676	1	0		Unknown	0		TRUE	TPK1	sp|P06244|KAPA_YEAST	cAMP-dependent protein kinase type 1
20180918_Lumos_RSLC6_Reiter_Ammerer_MFPL_onbead_Tpk1_1_3.49440.49440.4	FYAAEVCLALEYLHSK		4	6881.66	464.987	541.504	306.069	306.071	2161.99	1855.92	1.957e-05	36.968	35.061	1	0		Unknown	0		FALSE	TPK3	sp|P05986|KAPC_YEAST	cAMP-dependent protein kinase type 3	sp|P06244|KAPA_YEAST
20180918_Lumos_RSLC6_Reiter_Ammerer_MFPL_onbead_Tpk1_1_2.45801.45801.2	YPEEDINYGVQGEDPYADLFR		2	6449.13	1245.56	1164.03	-163.066	-163.063	2326.04	2489.1	1.962e-11	40.991	39.165	1	0		Unknown	0		TRUE	TPK1	sp|P06244|KAPA_YEAST	cAMP-dependent protein kinase type 1
20180918_Lumos_RSLC6_Reiter_Ammerer_MFPL_onbead_Tpk1_1_2.49068.49068.4	FYAAEVCLALEYLHSK		4	6872.51	464.987	541.504	306.069	306.071	2161.99	1855.92	1.89e-05	32.332	30.854	1	0		Unknown	0		FALSE	TPK3	sp|P05986|KAPC_YEAST	cAMP-dependent protein kinase type 3	sp|P06244|KAPA_YEAST
20180918_Lumos_RSLC6_Reiter_Ammerer_MFPL_onbead_Tpk1_1_2.45824.45824.3	YPEEDINYGVQGEDPYADLFR		3	6452.01	830.708	776.352	-163.067	-163.064	2326.04	2489.1	0.0001972	28.779	28.705	0.9977	0		Unknown	0		TRUE	TPK1	sp|P06244|KAPA_YEAST	cAMP-dependent protein kinase type 1
20180918_Lumos_RSLC6_Reiter_Ammerer_MFPL_onbead_Tpk1_1_2.45847.45847.2	VTSGKYSLQDFQILR		2	6454.94	877.976	641.842	-472.266	-472.264	1281.67	1753.94	0.008817	22.622	22.258	0.5929	0		Unknown	0		TRUE	TPK1	sp|P06244|KAPA_YEAST	cAMP-dependent protein kinase type 1
20180918_Lumos_RSLC6_Reiter_Ammerer_MFPL_onbead_Tpk1_1_2.45864.45864.2	VTSGKYSLQDFQILR		2	6457.13	877.976	641.842	-472.266	-472.264	1281.67	1753.94	0.009874	22.546	22.245	0.5754	0		Unknown	0		TRUE	TPK1	sp|P06244|KAPA_YEAST	cAMP-dependent protein kinase type 1
20180918_Lumos_RSLC6_Reiter_Ammerer_MFPL_onbead_Tpk1_3_1.45038.45038.3	FYAAEVCLALEYLHSK		3	6847.16	619.647	721.67	306.069	306.071	2161.99	1855.92	0.02909	22.417	17.996	0.9678	0		Unknown	0		FALSE	TPK3	sp|P05986|KAPC_YEAST	cAMP-dependent protein kinase type 3	sp|P06244|KAPA_YEAST
20180918_Lumos_RSLC6_Reiter_Ammerer_MFPL_onbead_Tpk1_3_3.46167.46167.4	FYAAEVCLALEYLHSK		4	6836.13	464.987	541.504	306.069	306.071	2161.99	1855.92	3.576e-05	34.979	33.46	1	0		Unknown	0		FALSE	TPK3	sp|P05986|KAPC_YEAST	cAMP-dependent protein kinase type 3	sp|P06244|KAPA_YEAST
20180918_Lumos_RSLC6_Reiter_Ammerer_MFPL_onbead_Tpk1_3_2.47378.47378.4	FYAAEVCLALEYLHSK		4	6851.12	464.987	541.504	306.068	306.071	2161.99	1855.92	4.508e-06	34.054	32.376	1	0		Unknown	0		FALSE	TPK3	sp|P05986|KAPC_YEAST	cAMP-dependent protein kinase type 3	sp|P06244|KAPA_YEAST
20180918_Lumos_RSLC6_Reiter_Ammerer_MFPL_onbead_Tpk1_3_2.47376.47376.3	FYAAEVCLALEYLHSK		3	6850.79	619.647	721.669	306.068	306.07	2161.99	1855.92	0.2531	20.09	17.372	0.8974	0		Unknown	0		FALSE	TPK3	sp|P05986|KAPC_YEAST	cAMP-dependent protein kinase type 3	sp|P06244|KAPA_YEAST
20180918_Lumos_RSLC6_Reiter_Ammerer_MFPL_onbead_Tpk1_4_2.46976.46976.4	FYAAEVCLALEYLHSK		4	6839.99	464.987	541.504	306.068	306.07	2161.99	1855.92	6.175e-06	34.935	33.471	1	0		Unknown	0		FALSE	TPK3	sp|P05986|KAPC_YEAST	cAMP-dependent protein kinase type 3	sp|P06244|KAPA_YEAST
20180918_Lumos_RSLC6_Reiter_Ammerer_MFPL_onbead_Tpk1_4_2.47903.47903.4	FYAAEVCLALEYLHSK		4	6955.5	464.987	541.504	306.068	306.07	2161.99	1855.92	7.957e-06	29.872	25.515	1	0		Unknown	0		FALSE	TPK3	sp|P05986|KAPC_YEAST	cAMP-dependent protein kinase type 3	sp|P06244|KAPA_YEAST
20180918_Lumos_RSLC6_Reiter_Ammerer_MFPL_onbead_Tpk1_1_2.46057.46057.2	YPEEDINYGVQGEDPYADLFR		2	6481.75	1245.56	1050.98	-389.16	-389.158	2099.94	2489.1	2.396e-10	33.622	28.224	1	0		Unknown	0		TRUE	TPK1	sp|P06244|KAPA_YEAST	cAMP-dependent protein kinase type 1
20180918_Lumos_RSLC6_Reiter_Ammerer_MFPL_onbead_Tpk1_1_2.48830.48830.3	FYAAEVCLALEYLHSK		3	6841.19	619.647	721.669	306.068	306.07	2161.99	1855.92	0.08932	20.144	17.353	0.9258	0		Unknown	0		FALSE	TPK3	sp|P05986|KAPC_YEAST	cAMP-dependent protein kinase type 3	sp|P06244|KAPA_YEAST
20180918_Lumos_RSLC6_Reiter_Ammerer_MFPL_onbead_Tpk1_4_1.44025.44025.4	FYAAEVCLALEYLHSK		4	6827.59	464.987	541.504	306.068	306.07	2161.99	1855.92	1.802e-05	32.38	30.904	1	0		Unknown	0		FALSE	TPK3	sp|P05986|KAPC_YEAST	cAMP-dependent protein kinase type 3	sp|P06244|KAPA_YEAST
20180918_Lumos_RSLC6_Reiter_Ammerer_MFPL_onbead_Tpk1_1_1.43611.43611.3	FYAAEVCLALEYLHSK		3	6836.92	619.647	721.669	306.068	306.07	2161.99	1855.92	0.1809	22.417	20.451	0.9143	0		Unknown	0		FALSE	TPK3	sp|P05986|KAPC_YEAST	cAMP-dependent protein kinase type 3	sp|P06244|KAPA_YEAST
20180918_Lumos_RSLC6_Reiter_Ammerer_MFPL_onbead_Tpk1_1_2.46328.46328.2	ITDFGFAK		2	6515.2	449.737	449.773	0.0714	0.0737	897.531	897.46	0.06388	14.33	11.185	0.9982	0		Unknown	0		FALSE	TPK3	sp|P05986|KAPC_YEAST	cAMP-dependent protein kinase type 3	sp|P06244|KAPA_YEAST, sp|P06245|KAPB_YEAST
20180918_Lumos_RSLC6_Reiter_Ammerer_MFPL_onbead_Tpk1_1_3.49203.49203.3	FYAAEVCLALEYLHSK		3	6847.23	619.647	721.669	306.068	306.07	2161.99	1855.92	1.055	22.427	20.798	0.3088	0		Unknown	0		FALSE	TPK3	sp|P05986|KAPC_YEAST	cAMP-dependent protein kinase type 3	sp|P06244|KAPA_YEAST
20180918_Lumos_RSLC6_Reiter_Ammerer_MFPL_onbead_Tpk1_1_2.46368.46368.2	YPEEDINYGVQGEDPYADLFR		2	6520.7	1245.56	1116	-259.114	-259.111	2229.99	2489.1	1.774e-10	33.589	28.149	1	0		Unknown	0		TRUE	TPK1	sp|P06244|KAPA_YEAST	cAMP-dependent protein kinase type 1
20180918_Lumos_RSLC6_Reiter_Ammerer_MFPL_onbead_Tpk1_1_2.46377.46377.3	YPEEDINYGVQGEDPYADLFR	Y[243]PEEDINYGVQGEDPYADLFR	3	6521.65	857.363	744.336	-339.083	-339.081	2229.99	2569.07	0.00406	25	23.155	0.9797	0	1Y(79.9663)	Unknown	0		FALSE	TPK1	sp|P06244|KAPA_YEAST	cAMP-dependent protein kinase type 1
20180918_Lumos_RSLC6_Reiter_Ammerer_MFPL_onbead_Tpk1_2_2.39663.39663.3	YVPDVTYTLCGTPDYIAPEVVSTKPYNK		3	6122.97	1045.19	1173.86	386.033	386.035	3518.57	3132.54	5.693e-10	36.055	36.055	1	0		Unknown	0		FALSE	TPK3	sp|P05986|KAPC_YEAST	cAMP-dependent protein kinase type 3	sp|P06244|KAPA_YEAST
20180918_Lumos_RSLC6_Reiter_Ammerer_MFPL_onbead_Tpk1_2_2.44679.44679.4	FYAAEVCLALEYLHSK		4	6838.54	464.987	541.504	306.068	306.07	2161.99	1855.92	1.541e-06	33.945	32.256	1	0		Unknown	0		FALSE	TPK3	sp|P05986|KAPC_YEAST	cAMP-dependent protein kinase type 3	sp|P06244|KAPA_YEAST
20180918_Lumos_RSLC6_Reiter_Ammerer_MFPL_onbead_Tpk1_4_2.47251.47251.3	FYAAEVCLALEYLHSK		3	6874.5	619.647	721.669	306.068	306.07	2161.99	1855.92	2.306	21.454	20.528	0.3587	0		Unknown	0		FALSE	TPK3	sp|P05986|KAPC_YEAST	cAMP-dependent protein kinase type 3	sp|P06244|KAPA_YEAST
20180918_Lumos_RSLC6_Reiter_Ammerer_MFPL_onbead_Tpk1_4_2.40714.40714.3	YVPDVTYTLCGTPDYIAPEVVSTKPYNK		3	6079.35	1045.19	1173.86	386.032	386.035	3518.57	3132.54	9.669e-09	37.035	37.035	1	0		Unknown	0		FALSE	TPK3	sp|P05986|KAPC_YEAST	cAMP-dependent protein kinase type 3	sp|P06244|KAPA_YEAST
20180918_Lumos_RSLC6_Reiter_Ammerer_MFPL_onbead_Tpk1_3_3.41479.41479.4	YVPDVTYTLCGTPDYIAPEVVSTKPYNK		4	6117.85	784.141	880.649	386.032	386.034	3518.57	3132.54	1.711e-12	57.434	57.434	1	0		Unknown	0		FALSE	TPK3	sp|P05986|KAPC_YEAST	cAMP-dependent protein kinase type 3	sp|P06244|KAPA_YEAST
20180918_Lumos_RSLC6_Reiter_Ammerer_MFPL_onbead_Tpk1_1_1.38860.38860.3	YVPDVTYTLCGTPDYIAPEVVSTKPYNK		3	6094.69	1045.19	1173.86	386.032	386.034	3518.57	3132.54	8.684e-11	39.823	39.823	1	0		Unknown	0		FALSE	TPK3	sp|P05986|KAPC_YEAST	cAMP-dependent protein kinase type 3	sp|P06244|KAPA_YEAST
20180918_Lumos_RSLC6_Reiter_Ammerer_MFPL_onbead_Tpk1_1_3.43457.43457.4	YVPDVTYTLCGTPDYIAPEVVSTKPYNK		4	6091.83	784.141	880.649	386.032	386.034	3518.57	3132.54	2.957e-13	54.361	54.361	1	0		Unknown	0		FALSE	TPK3	sp|P05986|KAPC_YEAST	cAMP-dependent protein kinase type 3	sp|P06244|KAPA_YEAST
20180918_Lumos_RSLC6_Reiter_Ammerer_MFPL_onbead_Tpk1_4_3.48330.48330.4	FYAAEVCLALEYLHSKDIIYR		4	7021.36	630.077	706.594	306.068	306.07	2822.35	2516.28	3.159e-09	35.032	32.35	1	0		Unknown	0		FALSE	TPK3	sp|P05986|KAPC_YEAST	cAMP-dependent protein kinase type 3	sp|P06244|KAPA_YEAST
20180918_Lumos_RSLC6_Reiter_Ammerer_MFPL_onbead_Tpk1_2_3.41031.41031.4	YVPDVTYTLCGTPDYIAPEVVSTKPYNK		4	6072.11	784.141	880.649	386.032	386.034	3518.57	3132.54	6.454e-13	54.511	54.511	1	0		Unknown	0		FALSE	TPK3	sp|P05986|KAPC_YEAST	cAMP-dependent protein kinase type 3	sp|P06244|KAPA_YEAST
20180918_Lumos_RSLC6_Reiter_Ammerer_MFPL_onbead_Tpk1_3_2.41938.41938.4	YVPDVTYTLCGTPDYIAPEVVSTKPYNK		4	6083.17	784.141	880.649	386.032	386.034	3518.57	3132.54	5.735e-11	48.395	48.395	1	0		Unknown	0		FALSE	TPK3	sp|P05986|KAPC_YEAST	cAMP-dependent protein kinase type 3	sp|P06244|KAPA_YEAST
20180918_Lumos_RSLC6_Reiter_Ammerer_MFPL_onbead_Tpk1_3_2.42788.42788.4	YVPDVTYTLCGTPDYIAPEVVSTKPYNK		4	6202.01	784.141	880.649	386.031	386.033	3518.57	3132.54	8.974e-11	48.045	48.045	1	0		Unknown	0		FALSE	TPK3	sp|P05986|KAPC_YEAST	cAMP-dependent protein kinase type 3	sp|P06244|KAPA_YEAST
20180918_Lumos_RSLC6_Reiter_Ammerer_MFPL_onbead_Tpk1_4_1.44011.44011.3	FYAAEVCLALEYLHSK		3	6825.57	619.647	721.669	306.068	306.07	2161.99	1855.92	1.344	20.143	18.712	0.6821	0		Unknown	0		FALSE	TPK3	sp|P05986|KAPC_YEAST	cAMP-dependent protein kinase type 3	sp|P06244|KAPA_YEAST
20180918_Lumos_RSLC6_Reiter_Ammerer_MFPL_onbead_Tpk1_4_3.48354.48354.4	FYAAEVCLALEYLHSKDIIYR		4	7025.16	630.077	706.593	306.068	306.07	2822.34	2516.28	0.001194	24.89	20.442	0.9882	0		Unknown	0		FALSE	TPK3	sp|P05986|KAPC_YEAST	cAMP-dependent protein kinase type 3	sp|P06244|KAPA_YEAST
20180918_Lumos_RSLC6_Reiter_Ammerer_MFPL_onbead_Tpk1_1_2.48810.48810.4	FYAAEVCLALEYLHSK		4	6838.34	464.987	541.504	306.067	306.07	2161.99	1855.92	0.0001714	34.953	33.492	1	0		Unknown	0		FALSE	TPK3	sp|P05986|KAPC_YEAST	cAMP-dependent protein kinase type 3	sp|P06244|KAPA_YEAST
20180918_Lumos_RSLC6_Reiter_Ammerer_MFPL_onbead_Tpk1_1_2.46982.46982.2	FPPFFNEDVK		2	6598.38	620.306	620.305	-0.0009	0.0014	1238.6	1238.6	0.0005086	19.014	12.107	0.9999	0		Unknown	0		TRUE	TPK1	sp|P06244|KAPA_YEAST	cAMP-dependent protein kinase type 1
20180918_Lumos_RSLC6_Reiter_Ammerer_MFPL_onbead_Tpk1_1_2.50943.50943.4	FYAAEVCLALEYLHSK		4	7126.79	464.987	541.504	306.067	306.07	2161.99	1855.92	2.98	17.512	16.095	0.2361	0		Unknown	0		FALSE	TPK3	sp|P05986|KAPC_YEAST	cAMP-dependent protein kinase type 3	sp|P06244|KAPA_YEAST
20180918_Lumos_RSLC6_Reiter_Ammerer_MFPL_onbead_Tpk1_2_3.41927.41927.4	YVPDVTYTLCGTPDYIAPEVVSTKPYNK		4	6201.48	784.141	880.649	386.03	386.032	3518.57	3132.54	0.000166	28.634	28.634	1	0		Unknown	0		FALSE	TPK3	sp|P05986|KAPC_YEAST	cAMP-dependent protein kinase type 3	sp|P06244|KAPA_YEAST
20180918_Lumos_RSLC6_Reiter_Ammerer_MFPL_onbead_Tpk1_1_2.47116.47116.2	YPEEDINYGVQGEDPYADLFR		2	6615.35	1245.56	1288.08	85.0364	85.0387	2574.14	2489.1	4.141e-10	37.43	33.359	1	0		85.0316:Thr->Trp (Thr->Trp substitution)	0		TRUE	TPK1	sp|P06244|KAPA_YEAST	cAMP-dependent protein kinase type 1
20180918_Lumos_RSLC6_Reiter_Ammerer_MFPL_onbead_Tpk1_1_2.47124.47124.2	YPEEDINYGVQGEDPYADLFR		2	6616.35	1245.56	1127.76	-235.588	-235.585	2253.51	2489.1	2.232e-08	28.489	23.026	1	0		Unknown	0		TRUE	TPK1	sp|P06244|KAPA_YEAST	cAMP-dependent protein kinase type 1
20180918_Lumos_RSLC6_Reiter_Ammerer_MFPL_onbead_Tpk1_1_2.47135.47135.3	FPPFFNEDVKDLLSR		3	6617.69	608.649	608.982	0.9997	1.002	1823.92	1822.93	3.106e-12	52.166	19.59	1	0		0.9970:Label:15N(1) (15N(1))	0		TRUE	TPK1	sp|P06244|KAPA_YEAST	cAMP-dependent protein kinase type 1
20180918_Lumos_RSLC6_Reiter_Ammerer_MFPL_onbead_Tpk1_1_2.47209.47209.4	NIETPYEPPIQQGQGDTSQFDKYPEEDINYGVQGEDPYADLFR	NIETPYEPPIQQGQGDT[181]SQFDKYPEEDINYGVQGEDPYADLFR	4	6627.17	1261.56	1294.07	130.038	130.04	5172.25	5042.21	4.383e-08	31.804	29.96	1	0	17T(79.9663)	Unknown	0		FALSE	TPK1	sp|P06244|KAPA_YEAST	cAMP-dependent protein kinase type 1
20180918_Lumos_RSLC6_Reiter_Ammerer_MFPL_onbead_Tpk1_1_2.47214.47214.2	FPPFFNEDVKDLLSR		2	6627.93	912.47	912.971	1.0011	1.0034	1823.93	1822.93	2.335e-11	38.569	14.59	1	0		0.9970:Label:15N(1) (15N(1))	0		TRUE	TPK1	sp|P06244|KAPA_YEAST	cAMP-dependent protein kinase type 1
20180918_Lumos_RSLC6_Reiter_Ammerer_MFPL_onbead_Tpk1_1_2.47222.47222.2	YPEEDINYGVQGEDPYADLFR		2	6628.96	1245.56	1292.82	94.5234	94.5257	2583.63	2489.1	2.396e-14	39.697	36.023	1	0		Unknown	0		TRUE	TPK1	sp|P06244|KAPA_YEAST	cAMP-dependent protein kinase type 1
20180918_Lumos_RSLC6_Reiter_Ammerer_MFPL_onbead_Tpk1_1_2.47229.47229.4	NIETPYEPPIQQGQGDTSQFDKYPEEDINYGVQGEDPYADLFR		4	6630.03	1241.57	1288.08	186.044	186.047	5148.29	4962.24	2.003e-11	44.849	43.018	1	0		Unknown	0		TRUE	TPK1	sp|P06244|KAPA_YEAST	cAMP-dependent protein kinase type 1
20180918_Lumos_RSLC6_Reiter_Ammerer_MFPL_onbead_Tpk1_2_3.41741.41741.3	YVPDVTYTLCGTPDYIAPEVVSTKPYNK		3	6173.64	1045.19	1173.86	386.029	386.031	3518.56	3132.54	7.848e-07	28.002	28.002	1	0		Unknown	0		FALSE	TPK3	sp|P05986|KAPC_YEAST	cAMP-dependent protein kinase type 3	sp|P06244|KAPA_YEAST
20180918_Lumos_RSLC6_Reiter_Ammerer_MFPL_onbead_Tpk1_1_2.47254.47254.3	FPPFFNEDVKDLLSR		3	6633.21	608.649	527.581	-243.204	-243.202	1579.72	1822.93	1.038e-08	41.452	20.312	1	0		Unknown	0		TRUE	TPK1	sp|P06244|KAPA_YEAST	cAMP-dependent protein kinase type 1
20180918_Lumos_RSLC6_Reiter_Ammerer_MFPL_onbead_Tpk1_1_2.47268.47268.2	YPEEDINYGVQGEDPYADLFR		2	6635.12	1245.56	1030	-431.114	-431.112	2057.99	2489.1	0.01126	17.77	13.593	0.8852	0		Unknown	0		TRUE	TPK1	sp|P06244|KAPA_YEAST	cAMP-dependent protein kinase type 1
20180918_Lumos_RSLC6_Reiter_Ammerer_MFPL_onbead_Tpk1_1_2.47282.47282.2	FPPFFNEDVK		2	6636.76	620.306	620.306	-0.0004	0.0019	1238.6	1238.6	4.82e-05	20.768	12.618	0.9999	0		Unknown	0		TRUE	TPK1	sp|P06244|KAPA_YEAST	cAMP-dependent protein kinase type 1
20180918_Lumos_RSLC6_Reiter_Ammerer_MFPL_onbead_Tpk1_1_2.47295.47295.4	NIETPYEPPIQQGQGDTSQFDKYPEEDINYGVQGEDPYADLFR		4	6638.31	1241.57	1293.32	207.028	207.03	5169.27	4962.24	7.015e-11	38.363	38.363	1	0		Unknown	0		TRUE	TPK1	sp|P06244|KAPA_YEAST	cAMP-dependent protein kinase type 1
20180918_Lumos_RSLC6_Reiter_Ammerer_MFPL_onbead_Tpk1_1_2.47351.47351.5	NIETPYEPPIQQGQGDTSQFDKYPEEDINYGVQGEDPYADLFR	NIETPYEPPIQQGQGDT[181]SQFDKY[243]PEEDINYGVQGEDPYADLFR	5	6645.72	1025.44	1035.26	49.0805	49.0828	5171.25	5122.17	7.204e-13	44.559	44.559	1	0	17T(79.9663), 23Y(79.9663)	Unknown	0		FALSE	TPK1	sp|P06244|KAPA_YEAST	cAMP-dependent protein kinase type 1
20180918_Lumos_RSLC6_Reiter_Ammerer_MFPL_onbead_Tpk1_1_2.47354.47354.5	NIETPYEPPIQQGQGDTSQFDKYPEEDINYGVQGEDPYADLFR		5	6646.19	993.456	1038.05	222.989	222.992	5185.23	4962.24	2.376e-09	35.649	35.649	1	0		Unknown	0		TRUE	TPK1	sp|P06244|KAPA_YEAST	cAMP-dependent protein kinase type 1
20180918_Lumos_RSLC6_Reiter_Ammerer_MFPL_onbead_Tpk1_1_2.47359.47359.4	NIETPYEPPIQQGQGDTSQFDKYPEEDINYGVQGEDPYADLFR		4	6646.81	1241.57	1293.83	209.03	209.032	5171.27	4962.24	1.123e-08	33.152	33.152	1	0		Unknown	0		TRUE	TPK1	sp|P06244|KAPA_YEAST	cAMP-dependent protein kinase type 1
20180918_Lumos_RSLC6_Reiter_Ammerer_MFPL_onbead_Tpk1_1_2.47395.47395.3	FPPFFNEDVKDLLSR		3	6651.27	608.649	608.649	-0.0016	0.0007	1822.92	1822.93	2.901e-15	60.539	17.45	1	0		Unknown	0		TRUE	TPK1	sp|P06244|KAPA_YEAST	cAMP-dependent protein kinase type 1
20180918_Lumos_RSLC6_Reiter_Ammerer_MFPL_onbead_Tpk1_1_2.47403.47403.5	NIETPYEPPIQQGQGDTSQFDKYPEEDINYGVQGEDPYADLFR		5	6652.18	993.456	1030.46	185.036	185.038	5147.28	4962.24	7.23e-09	40.082	40.082	1	0		Unknown	0		TRUE	TPK1	sp|P06244|KAPA_YEAST	cAMP-dependent protein kinase type 1
20180918_Lumos_RSLC6_Reiter_Ammerer_MFPL_onbead_Tpk1_1_2.47413.47413.3	FPPFFNEDVKDLLSR		3	6653.47	608.649	559.626	-147.068	-147.066	1675.86	1822.93	2.202e-13	50.685	17.88	1	0		Unknown	0		TRUE	TPK1	sp|P06244|KAPA_YEAST	cAMP-dependent protein kinase type 1
20180918_Lumos_RSLC6_Reiter_Ammerer_MFPL_onbead_Tpk1_1_2.47425.47425.3	FPPFFNEDVKDLLSR		3	6655.12	608.649	527.275	-244.123	-244.121	1578.8	1822.93	5.633e-08	44.584	20.409	1	0		Unknown	0		TRUE	TPK1	sp|P06244|KAPA_YEAST	cAMP-dependent protein kinase type 1
20180918_Lumos_RSLC6_Reiter_Ammerer_MFPL_onbead_Tpk1_1_2.47464.47464.2	FPPFFNEDVKDLLSR		2	6659.92	912.47	912.469	-0.0015	0.0008	1822.92	1822.93	1.968e-12	38.412	15.311	1	0		Unknown	0		TRUE	TPK1	sp|P06244|KAPA_YEAST	cAMP-dependent protein kinase type 1
20180918_Lumos_RSLC6_Reiter_Ammerer_MFPL_onbead_Tpk1_1_2.47494.47494.4	NIETPYEPPIQQGQGDTSQFDKYPEEDINYGVQGEDPYADLFR		4	6663.96	1241.57	1287.83	185.037	185.039	5147.28	4962.24	3.099e-15	49.396	47.413	1	0		Unknown	0		TRUE	TPK1	sp|P06244|KAPA_YEAST	cAMP-dependent protein kinase type 1
20180918_Lumos_RSLC6_Reiter_Ammerer_MFPL_onbead_Tpk1_1_2.47513.47513.4	NIETPYEPPIQQGQGDTSQFDKYPEEDINYGVQGEDPYADLFR		4	6666.65	1241.57	1287.58	184.036	184.038	5146.28	4962.24	1e-15	55.124	50.24	1	0		Unknown	0		TRUE	TPK1	sp|P06244|KAPA_YEAST	cAMP-dependent protein kinase type 1
20180918_Lumos_RSLC6_Reiter_Ammerer_MFPL_onbead_Tpk1_1_2.47515.47515.2	YPEEDINYGVQGEDPYADLFR		2	6666.8	1245.56	1246.06	1.009	1.0113	2490.11	2489.1	1.56e-15	53.092	36.275	1	0		Unknown	0		TRUE	TPK1	sp|P06244|KAPA_YEAST	cAMP-dependent protein kinase type 1
20180918_Lumos_RSLC6_Reiter_Ammerer_MFPL_onbead_Tpk1_1_2.47535.47535.2	YPEEDINYGVQGEDPYADLFR		2	6669.35	1245.56	1246.06	1.0034	1.0057	2490.11	2489.1	1e-15	55.375	36.272	1	0		0.9970:Label:15N(1) (15N(1))	0		TRUE	TPK1	sp|P06244|KAPA_YEAST	cAMP-dependent protein kinase type 1
20180918_Lumos_RSLC6_Reiter_Ammerer_MFPL_onbead_Tpk1_1_2.47557.47557.4	NIETPYEPPIQQGQGDTSQFDKYPEEDINYGVQGEDPYADLFR		4	6672.29	1241.57	1288.08	186.041	186.043	5148.28	4962.24	1.331e-10	40.081	40.081	1	0		Unknown	0		TRUE	TPK1	sp|P06244|KAPA_YEAST	cAMP-dependent protein kinase type 1
20180918_Lumos_RSLC6_Reiter_Ammerer_MFPL_onbead_Tpk1_1_2.47559.47559.2	YSLQDFQILR		2	6672.45	641.843	641.842	-0.0012	0.0011	1281.67	1281.67	0.0154	22.117	21.572	0.9994	0		Unknown	0		TRUE	TPK1	sp|P06244|KAPA_YEAST	cAMP-dependent protein kinase type 1
20180918_Lumos_RSLC6_Reiter_Ammerer_MFPL_onbead_Tpk1_2_3.41842.41842.4	YVPDVTYTLCGTPDYIAPEVVSTKPYNK		4	6188.52	784.141	880.649	386.029	386.031	3518.56	3132.54	5.573e-09	39.624	39.624	1	0		Unknown	0		FALSE	TPK3	sp|P05986|KAPC_YEAST	cAMP-dependent protein kinase type 3	sp|P06244|KAPA_YEAST
20180918_Lumos_RSLC6_Reiter_Ammerer_MFPL_onbead_Tpk1_1_2.47621.47621.3	YPEEDINYGVQGEDPYADLFR		3	6680.69	830.708	831.042	1.0017	1.004	2490.1	2489.1	3.128e-11	42.842	32.657	1	0		0.9970:Label:15N(1) (15N(1))	0		TRUE	TPK1	sp|P06244|KAPA_YEAST	cAMP-dependent protein kinase type 1
20180918_Lumos_RSLC6_Reiter_Ammerer_MFPL_onbead_Tpk1_1_2.47645.47645.3	FPPFFNEDVKDLLSR		3	6683.74	608.649	608.649	-0.0016	0.0007	1822.92	1822.93	1.2e-15	60.558	17.378	1	0		Unknown	0		TRUE	TPK1	sp|P06244|KAPA_YEAST	cAMP-dependent protein kinase type 1
20180918_Lumos_RSLC6_Reiter_Ammerer_MFPL_onbead_Tpk1_1_2.47666.47666.3	FPPFFNEDVKDLLSR		3	6686.57	608.649	559.626	-147.069	-147.066	1675.86	1822.93	3.071e-13	50.627	17.86	1	0		Unknown	0		TRUE	TPK1	sp|P06244|KAPA_YEAST	cAMP-dependent protein kinase type 1
20180918_Lumos_RSLC6_Reiter_Ammerer_MFPL_onbead_Tpk1_1_2.47685.47685.3	YPEEDINYGVQGEDPYADLFR		3	6688.99	830.708	831.042	1.0007	1.003	2490.1	2489.1	3.056e-09	38.513	32.731	1	0		0.9970:Label:15N(1) (15N(1))	0		TRUE	TPK1	sp|P06244|KAPA_YEAST	cAMP-dependent protein kinase type 1
20180918_Lumos_RSLC6_Reiter_Ammerer_MFPL_onbead_Tpk1_1_2.47717.47717.2	FPPFFNEDVKDLLSR		2	6693.25	912.47	912.469	-0.0017	0.0006	1822.92	1822.93	3.271e-12	40.328	13.649	1	0		Unknown	0		TRUE	TPK1	sp|P06244|KAPA_YEAST	cAMP-dependent protein kinase type 1
20180918_Lumos_RSLC6_Reiter_Ammerer_MFPL_onbead_Tpk1_1_2.47739.47739.3	YPEEDINYGVQGEDPYADLFR		3	6696.02	830.708	831.041	1	1.0023	2490.1	2489.1	5.019e-07	38.447	32.657	1	0		0.9970:Label:15N(1) (15N(1))	0		TRUE	TPK1	sp|P06244|KAPA_YEAST	cAMP-dependent protein kinase type 1
20180918_Lumos_RSLC6_Reiter_Ammerer_MFPL_onbead_Tpk1_1_2.47791.47791.2	YPEEDINYGVQGEDPYADLFR		2	6702.77	1245.56	1246.06	1.0039	1.0062	2490.11	2489.1	1e-15	58.269	39.13	1	0		0.9970:Label:15N(1) (15N(1))	0		TRUE	TPK1	sp|P06244|KAPA_YEAST	cAMP-dependent protein kinase type 1
20180918_Lumos_RSLC6_Reiter_Ammerer_MFPL_onbead_Tpk1_1_2.47803.47803.4	NIETPYEPPIQQGQGDTSQFDKYPEEDINYGVQGEDPYADLFR		4	6704.18	1241.57	1287.83	185.037	185.04	5147.28	4962.24	6.624e-08	34.988	34.988	1	0		Unknown	0		TRUE	TPK1	sp|P06244|KAPA_YEAST	cAMP-dependent protein kinase type 1
20180918_Lumos_RSLC6_Reiter_Ammerer_MFPL_onbead_Tpk1_1_2.47838.47838.3	FPPFFNEDVKDLLSR		3	6708.33	608.649	621.632	38.9486	38.9509	1861.87	1822.93	0.009891	21.78	16.695	0.9396	0		Unknown	0		TRUE	TPK1	sp|P06244|KAPA_YEAST	cAMP-dependent protein kinase type 1
20180918_Lumos_RSLC6_Reiter_Ammerer_MFPL_onbead_Tpk1_1_2.47843.47843.2	YPEEDINYGVQGEDPYADLFR		2	6709.02	1245.56	1287.58	84.0432	84.0455	2573.15	2489.1	5.352e-12	38.432	33.394	1	0		Unknown	0		TRUE	TPK1	sp|P06244|KAPA_YEAST	cAMP-dependent protein kinase type 1
20180918_Lumos_RSLC6_Reiter_Ammerer_MFPL_onbead_Tpk1_1_2.47852.47852.3	FPPFFNEDVKDLLSR		3	6710.03	608.649	560.638	-144.032	-144.03	1678.89	1822.93	0.0002246	26.349	19.15	0.9914	0		Unknown	0		TRUE	TPK1	sp|P06244|KAPA_YEAST	cAMP-dependent protein kinase type 1
20180918_Lumos_RSLC6_Reiter_Ammerer_MFPL_onbead_Tpk1_1_2.47874.47874.2	YSLQDFQILR		2	6712.66	641.843	641.841	-0.0045	-0.0022	1281.67	1281.67	1.14	9.346	9.268	0.9648	0		Unknown	0		TRUE	TPK1	sp|P06244|KAPA_YEAST	cAMP-dependent protein kinase type 1
20180918_Lumos_RSLC6_Reiter_Ammerer_MFPL_onbead_Tpk1_1_2.47905.47905.3	FPPFFNEDVKDLLSR		3	6716.83	608.649	608.648	-0.0024	-0.0001	1822.92	1822.93	5.918e-15	57.418	17.41	1	0		Unknown	0		TRUE	TPK1	sp|P06244|KAPA_YEAST	cAMP-dependent protein kinase type 1
20180918_Lumos_RSLC6_Reiter_Ammerer_MFPL_onbead_Tpk1_1_2.47920.47920.3	FPPFFNEDVKDLLSR		3	6718.94	608.649	559.625	-147.071	-147.069	1675.85	1822.93	4.975e-15	50.604	17.838	1	0		Unknown	0		TRUE	TPK1	sp|P06244|KAPA_YEAST	cAMP-dependent protein kinase type 1
20180918_Lumos_RSLC6_Reiter_Ammerer_MFPL_onbead_Tpk1_1_2.47975.47975.2	FPPFFNEDVKDLLSR		2	6726.87	912.47	912.469	-0.0012	0.0011	1822.92	1822.93	2.564e-12	40.318	13.51	1	0		Unknown	0		TRUE	TPK1	sp|P06244|KAPA_YEAST	cAMP-dependent protein kinase type 1
20180918_Lumos_RSLC6_Reiter_Ammerer_MFPL_onbead_Tpk1_1_2.48030.48030.4	NIETPYEPPIQQGQGDTSQFDKYPEEDINYGVQGEDPYADLFR		4	6734.14	1241.57	1246.57	19.9946	19.9969	4982.24	4962.24	1e-15	38.557	36.652	1	0		19.9898:Trp->Hydroxykynurenin (tryptophan oxidation to hydroxykynurenin)	0		TRUE	TPK1	sp|P06244|KAPA_YEAST	cAMP-dependent protein kinase type 1
20180918_Lumos_RSLC6_Reiter_Ammerer_MFPL_onbead_Tpk1_1_2.48032.48032.2	ITDFGFAK		2	6734.43	449.737	449.737	-0.0008	0.0015	897.459	897.46	0.004151	13.999	10.187	0.9997	0		Unknown	0		FALSE	TPK3	sp|P05986|KAPC_YEAST	cAMP-dependent protein kinase type 3	sp|P06244|KAPA_YEAST, sp|P06245|KAPB_YEAST
20180918_Lumos_RSLC6_Reiter_Ammerer_MFPL_onbead_Tpk1_1_2.48036.48036.4	NIETPYEPPIQQGQGDTSQFDKYPEEDINYGVQGEDPYADLFR		4	6735.1	1241.57	1246.32	18.999	19.0013	4981.24	4962.24	6.594e-14	44.019	41.985	1	0		19.0098:Gln->Phe (Gln->Phe substitution)	0		TRUE	TPK1	sp|P06244|KAPA_YEAST	cAMP-dependent protein kinase type 1
20180918_Lumos_RSLC6_Reiter_Ammerer_MFPL_onbead_Tpk1_1_2.48079.48079.3	FPPFFNEDVKDLLSR		3	6740.88	608.649	559.285	-148.091	-148.089	1674.83	1822.93	4.223e-13	48.801	17.037	1	0		Unknown	0		TRUE	TPK1	sp|P06244|KAPA_YEAST	cAMP-dependent protein kinase type 1
20180918_Lumos_RSLC6_Reiter_Ammerer_MFPL_onbead_Tpk1_4_3.47172.47172.4	FYAAEVCLALEYLHSK		4	6846.25	464.987	541.504	306.068	306.07	2161.99	1855.92	1.961e-05	32.429	30.961	0.9968	0		Unknown	0		FALSE	TPK3	sp|P05986|KAPC_YEAST	cAMP-dependent protein kinase type 3	sp|P06244|KAPA_YEAST
20180918_Lumos_RSLC6_Reiter_Ammerer_MFPL_onbead_Tpk1_1_2.48117.48117.3	VTSGKYSLQDFQILR		3	6745.7	585.653	642.343	170.071	170.074	1924.01	1753.94	0.006635	26.748	26.21	0.537	0		Unknown	0		TRUE	TPK1	sp|P06244|KAPA_YEAST	cAMP-dependent protein kinase type 1
20180918_Lumos_RSLC6_Reiter_Ammerer_MFPL_onbead_Tpk1_1_2.48151.48151.3	FPPFFNEDVKDLLSR		3	6750.5	608.649	608.982	1.0003	1.0026	1823.93	1822.93	1.498e-14	57.548	17.628	1	0		0.9970:Label:15N(1) (15N(1))	0		TRUE	TPK1	sp|P06244|KAPA_YEAST	cAMP-dependent protein kinase type 1
20180918_Lumos_RSLC6_Reiter_Ammerer_MFPL_onbead_Tpk1_1_2.48213.48213.2	FPPFFNEDVKDLLSR		2	6759.25	912.47	912.97	0.9997	1.002	1823.92	1822.93	5.983e-12	40.548	14.878	1	0		0.9970:Label:15N(1) (15N(1))	0		TRUE	TPK1	sp|P06244|KAPA_YEAST	cAMP-dependent protein kinase type 1
20180918_Lumos_RSLC6_Reiter_Ammerer_MFPL_onbead_Tpk1_1_2.48233.48233.2	FPPFFNEDVK		2	6762.16	620.306	620.305	-0.001	0.0013	1238.6	1238.6	0.000236	19.642	12.531	0.9999	0		Unknown	0		TRUE	TPK1	sp|P06244|KAPA_YEAST	cAMP-dependent protein kinase type 1
20180918_Lumos_RSLC6_Reiter_Ammerer_MFPL_onbead_Tpk1_1_2.48251.48251.2	YSLQDFQILR		2	6764.52	641.843	642.344	1.0021	1.0044	1282.67	1281.67	0.02021	21.913	20.998	0.9995	0		0.9970:Label:15N(1) (15N(1))	0		TRUE	TPK1	sp|P06244|KAPA_YEAST	cAMP-dependent protein kinase type 1
[truncated: 7,280 more rows]

## Sheet: 1B. TPK1 peptides
MaxQuant results (database search): all TPK1 peptides identified in the exploratory measurements
[truncated: 49 more rows]
[truncated: 23 more columns]

## Sheet: 1C. PRM TPK1 normalis. peptides
PRM assay: TPK1 non-modified peptides used for normalisation between samples; quantitative values were normalised to PRTC retention time peptides (in Skyline)
[truncated: 46 more rows]

[truncated: 1 more sheets: 1D.PRM TPK1 modif peptide quant]
